# Supplementary material for: Inherited burden for disease predisposition in diverse populations
Source: Research Square preprint supplement (doi:10.21203/rs.3.rs-6169692/v1), 2025-03-10
Supplement: Supplementary file 2 [file 882bfbc45f7e4b9beda66426.xlsx]

## Sheet: Table S1
#Table S1. 3895 disease genes and their disease mechanism, OMIM phenotypes, PanelApp panels & their matched ICD-10 group, and count of associated disease group.
Gene	Disease Mechanism	OMIM	Panel; Inheritance; ICD-10	ICD-10 Group Count
AAAS	LoF	Achalasia-addisonianism-alacrimia syndrome (231550) (AR)	Severe Paediatric Disorders (AR ) (-); Fetal anomalies (AR ) (Congenital); Familial dysautonomia (AR ) (Nervous); Congenital adrenal hypoplasia (AR ) (Endocrine/Metabolic)	3
AAGAB	LoF	Keratoderma, palmoplantar, punctate type IA (148600) (AD)	Palmoplantar keratoderma and erythrokeratodermas (AD ) (Skin)	1
AARS1	LoF+GoF	?Leukoencephalopathy, hereditary diffuse, with spheroids 2 (619661) (AD);Charcot-Marie-Tooth disease, axonal, type 2N (613287) (AD);Developmental and epileptic encephalopathy 29 (616339) (AR);Trichothiodystrophy 8, nonphotosensitive (619691) (AR)	Severe Paediatric Disorders (AD_GOF ) (-); DDG2P (AR ) (Congenital); Adult onset leukodystrophy (AD_GOF ) (Nervous)	2
AARS2	LoF	Combined oxidative phosphorylation deficiency 8 (614096) (AR);Leukoencephalopathy, progressive, with ovarian failure (615889) (AR)	Severe Paediatric Disorders (AR ) (-); White matter disorders and cerebral calcification - narrow panel (AR ) (Nervous); Undiagnosed metabolic disorders (AR ) (Endocrine/Metabolic); Primary ovarian insufficiency (AR ) (Endocrine/Metabolic); Possible mitochondrial disorder - nuclear genes (AR ) (Endocrine/Metabolic); Paediatric or syndromic cardiomyopathy (AR ) (Circulatory); Fetal anomalies (AR )…	4
AASS	LoF	Hyperlysinemia (238700) (AR)	DDG2P (AR ) (Congenital); Undiagnosed metabolic disorders (AR ) (Endocrine/Metabolic); Severe Paediatric Disorders (AR ) (-); Intellectual disability - microarray and sequencing (AR ) (Nervous)	3
ABAT	LoF	GABA-transaminase deficiency (613163) (AR)	Severe Paediatric Disorders (AR ) (-); Undiagnosed metabolic disorders (AR ) (Endocrine/Metabolic); Mitochondrial DNA maintenance disorder (AR ) (Endocrine/Metabolic); Early onset or syndromic epilepsy (AR ) (Nervous); DDG2P (AR ) (Congenital)	3
ABCA1	LoF	HDL deficiency, familial, 1 (604091) (AD);Tangier disease (205400) (AR)	Severe Paediatric Disorders (AD ) (-); Undiagnosed metabolic disorders (AR ) (Endocrine/Metabolic); Hereditary neuropathy (AR ) (Nervous)	2
ABCA12	LoF	Ichthyosis, congenital, autosomal recessive 4A (601277) (AR);Ichthyosis, congenital, autosomal recessive 4B (harlequin) (242500) (AR)	Autosomal recessive congenital ichthyosis (AR ) (Skin); Severe Paediatric Disorders (AR ) (-); Fetal anomalies (AR ) (Congenital)	2
ABCA2	LoF	Intellectual developmental disorder with poor growth and with or without seizures or ataxia (618808) (AR)	Intellectual disability - microarray and sequencing (AR ) (Nervous)	1
ABCA3	LoF	Surfactant metabolism dysfunction, pulmonary, 3 (610921) (AR)	Severe Paediatric Disorders (AR ) (-); Surfactant deficiency (AR ) (Respiratory); Familial pulmonary fibrosis (AR ) (Respiratory)	1
ABCA4	LoF	{Macular degeneration, age-related, 2} (153800) (AD);Cone-rod dystrophy 3 (604116) (AR);Fundus flavimaculatus (248200) (AR);Retinal dystrophy, early-onset severe (248200) (AR);Retinitis pigmentosa 19 (601718) (AR);Stargardt disease 1 (248200) (AR)	Severe Paediatric Disorders (AD ) (-); Retinal disorders (AR ) (Eye)	1
ABCB11	LoF	Cholestasis, benign recurrent intrahepatic, 2 (605479) (AR);Cholestasis, progressive familial intrahepatic 2 (601847) (AR)	Severe Paediatric Disorders (AR ) (-); Undiagnosed metabolic disorders (AR ) (Endocrine/Metabolic); Neonatal cholestasis (AR ) (Digestive); DDG2P (AR ) (Congenital)	3
ABCB4	LoF	Cholestasis, intrahepatic, of pregnancy, 3 (614972) (AD, AR);Cholestasis, progressive familial intrahepatic 3 (602347) (AR);Gallbladder disease 1 (600803) (AD, AR)	Severe Paediatric Disorders (AD ) (-); Undiagnosed metabolic disorders (AD ) (Endocrine/Metabolic); Neonatal cholestasis (AD ) (Digestive)	2
ABCB6	LoF	[Blood group, Langereis system] (111600);Dyschromatosis universalis hereditaria 3 (615402) (AD);Microphthalmia, isolated, with coloboma 7 (614497) (AD);Pseudohyperkalemia, familial, 2, due to red cell leak (609153) (AD)	Pigmentary skin disorders (AD ) (Skin); Structural eye disease (AD ) (Eye)	2
ABCB7	LoF	Anemia, sideroblastic, with ataxia (301310) (XL)	Severe Paediatric Disorders (XLR ) (-); Undiagnosed metabolic disorders (XLR ) (Endocrine/Metabolic); Rare anaemia (XLR ) (Blood/Immune); Possible mitochondrial disorder - nuclear genes (XLR ) (Endocrine/Metabolic); Mitochondrial disorders (XLR ) (Endocrine/Metabolic); Likely inborn error of metabolism - targeted testing not possible (XLR ) (Endocrine/Metabolic); Iron metabolism disorders - NOT c…	4
ABCC2	LoF	Dubin-Johnson syndrome (237500) (AR)	Severe Paediatric Disorders (AR ) (-); Neonatal cholestasis (AR ) (Digestive)	1
ABCC6	LoF	Arterial calcification, generalized, of infancy, 2 (614473) (AR);Pseudoxanthoma elasticum (264800) (AR);Pseudoxanthoma elasticum, forme fruste (177850) (AD)	Severe Paediatric Disorders (AD ) (-); Retinal disorders (AR ) (Eye); Pseudoxanthoma elasticum (AR ) (Musculoskeletal/Connective); Generalised arterial calcification in infancy (AR ) (Circulatory); Fetal anomalies (AR ) (Congenital); Familial cerebral small vessel disease (AD ) (Nervous)	5
ABCC8	LoF	Diabetes mellitus, noninsulin-dependent (125853) (AD);Diabetes mellitus, permanent neonatal 3, with or without neurologic features (618857) (AD, AR);Diabetes mellitus, transient neonatal 2 (610374);Hyperinsulinemic hypoglycemia, familial, 1 (256450) (AD, AR);Hypoglycemia of infancy, leucine-sensitive (240800) (AD);Diabetes mellitus, noninsulin-dependent (125853) (AD);Diabetes mellitus, permanent …	Severe Paediatric Disorders (AD ) (-); Diabetes with additional phenotypes suggestive of a monogenic aetiology (AD ) (Endocrine/Metabolic)	1
ABCC9	LoF	?Atrial fibrillation, familial, 12 (614050) (AD);Cardiomyopathy, dilated, 1O (608569) (AD);Hypertrichotic osteochondrodysplasia (Cantu syndrome) (239850) (AD);Intellectual disability and myopathy syndrome (619719) (AR)	Fetal anomalies (AD ) (Congenital); Skeletal dysplasia (AD ) (Musculoskeletal/Connective); Severe Paediatric Disorders (AD ) (-); Intellectual disability - microarray and sequencing (AD ) (Nervous); Dilated Cardiomyopathy and conduction defects (AD ) (Circulatory)	4
ABCD1	LoF	Adrenoleukodystrophy (300100) (XLR);Adrenomyeloneuropathy, adult (300100) (XLR)	DDG2P (XLR ) (Congenital); White matter disorders and cerebral calcification - narrow panel (XLR ) (Nervous); Undiagnosed metabolic disorders (XLR ) (Endocrine/Metabolic); Severe Paediatric Disorders (XLR ) (-); Peroxisomal disorders (XLR ) (Endocrine/Metabolic); Likely inborn error of metabolism - targeted testing not possible (XLR ) (Endocrine/Metabolic); Intellectual disability - microarray an…	3
ABCD4	LoF	Methylmalonic aciduria and homocystinuria, cblJ type (614857) (AR)	Severe Paediatric Disorders (AR ) (-); Undiagnosed metabolic disorders (AR ) (Endocrine/Metabolic); Intellectual disability - microarray and sequencing (AR ) (Nervous); DDG2P (AR ) (Congenital)	3
ABCG5	LoF	Sitosterolemia 2 (618666) (AR)	Severe Paediatric Disorders (AR ) (-); Sitosterolaemia (AR ) (Endocrine/Metabolic); Inherited bleeding disorders (AR ) (Blood/Immune); Familial hypercholesterolaemia (AR ) (Endocrine/Metabolic)	2
ABCG8	LoF	{Gallbladder disease 4} (611465);Sitosterolemia 1 (210250) (AR)	Severe Paediatric Disorders (AR ) (-); Sitosterolaemia (AR ) (Endocrine/Metabolic); Inherited bleeding disorders (AR ) (Blood/Immune); Familial hypercholesterolaemia (AR ) (Endocrine/Metabolic)	2
ABHD12	LoF	Polyneuropathy, hearing loss, ataxia, retinitis pigmentosa, and cataract (612674) (AR);Polyneuropathy, hearing loss, ataxia, retinitis pigmentosa, and cataract (612674) (AR)	Severe Paediatric Disorders (AR ) (-); Undiagnosed metabolic disorders (AR ) (Endocrine/Metabolic); Monogenic hearing loss (AR ) (Ear); Bilateral congenital or childhood onset cataracts (AR ) (Eye); Ataxia and cerebellar anomalies - narrow panel (AR ) (Nervous)	4
ABHD16A	LoF	Spastic paraplegia 86, autosomal recessive (619735) (AR)	White matter disorders and cerebral calcification - narrow panel (AR ) (Nervous); DDG2P (AR ) (Congenital)	2
ABHD5	LoF	Chanarin-Dorfman syndrome (275630) (AR)	Palmoplantar keratodermas (AR ) (Skin); Undiagnosed metabolic disorders (AR ) (Endocrine/Metabolic); Severe Paediatric Disorders (AR ) (-); Intellectual disability - microarray and sequencing (AR ) (Nervous); Fetal anomalies (AR ) (Congenital)	4
ABL1	GoF	Congenital heart defects and skeletal malformations syndrome (617602) (AD);Leukemia, Philadelphia chromosome-positive, resistant to imatinib (608232) (SMu);Congenital heart defects and skeletal malformations syndrome (617602) (AD);Leukemia, Philadelphia chromosome-positive, resistant to imatinib (608232) (SMu)	Fetal anomalies (AD_GOF ) (Congenital); Thoracic aortic aneurysm or dissection GMS (AD_GOF ) (Circulatory); Severe Paediatric Disorders (AD_GOF ) (-); Paediatric disorders - additional genes (AD_GOF ) (-); Familial non syndromic congenital heart disease (AD_GOF ) (Ear)	3
ACAD8	LoF	Isobutyryl-CoA dehydrogenase deficiency (611283) (AR)	Severe Paediatric Disorders (AR ) (-); Undiagnosed metabolic disorders (AR ) (Endocrine/Metabolic)	1
ACAD9	LoF	Mitochondrial complex I deficiency, nuclear type 20 (611126) (AR)	Severe Paediatric Disorders (AR ) (-); Undiagnosed metabolic disorders (AR ) (Endocrine/Metabolic); Rhabdomyolysis and metabolic muscle disorders (AR ) (Musculoskeletal/Connective); Paediatric or syndromic cardiomyopathy (AR ) (Circulatory); Mitochondrial disorder with complex I deficiency (AR ) (Endocrine/Metabolic); Intellectual disability - microarray and sequencing (AR ) (Nervous); Fetal anom…	5
ACADM	LoF	Acyl-CoA dehydrogenase, medium chain, deficiency of (201450) (AR)	Severe Paediatric Disorders (AR ) (-); Rhabdomyolysis and metabolic muscle disorders (AR ) (Musculoskeletal/Connective); Intellectual disability - microarray and sequencing (AR ) (Nervous); Hyperammonaemia (AR ) (Endocrine/Metabolic); DDG2P (AR ) (Congenital)	4
ACADS	LoF	Acyl-CoA dehydrogenase, short-chain, deficiency of (201470) (AR)	Severe Paediatric Disorders (AR ) (-); Undiagnosed metabolic disorders (AR ) (Endocrine/Metabolic); Intellectual disability - microarray and sequencing (AR ) (Nervous); DDG2P (AR ) (Congenital)	3
ACADSB	LoF	2-methylbutyrylglycinuria (610006) (AR)	Severe Paediatric Disorders (AR ) (-); Undiagnosed metabolic disorders (AR ) (Endocrine/Metabolic)	1
ACADVL	LoF	VLCAD deficiency (201475) (AR)	Severe Paediatric Disorders (AR ) (-); Rhabdomyolysis and metabolic muscle disorders (AR ) (Musculoskeletal/Connective); Paediatric or syndromic cardiomyopathy (AR ) (Circulatory); Hyperammonaemia (AR ) (Endocrine/Metabolic); Fetal anomalies (AR ) (Congenital)	4
ACAN	LoF	?Spondyloepiphyseal dysplasia, Kimberley type (608361) (AD);Short stature and advanced bone age, with or without early-onset osteoarthritis and/or osteochondritis dissecans (165800) (AD);Spondyloepimetaphyseal dysplasia, aggrecan type (612813) (AR)	Fetal anomalies (AD ) (Congenital); Skeletal dysplasia (AD ) (Musculoskeletal/Connective); Severe Paediatric Disorders (AD ) (-)	2
ACAT1	LoF	Alpha-methylacetoacetic aciduria (203750) (AR)	Severe Paediatric Disorders (AR ) (-); Undiagnosed metabolic disorders (AR ) (Endocrine/Metabolic); Ketotic hypoglycaemia (AR ) (Endocrine/Metabolic); DDG2P (AR ) (Congenital)	2
ACBD5	LoF	Retinal dystrophy with leukodystrophy (618863) (AR)	White matter disorders and cerebral calcification - narrow panel (AR ) (Nervous); Retinal disorders (AR ) (Eye); Peroxisomal disorders (AR ) (Endocrine/Metabolic); DDG2P (AR ) (Congenital)	4
ACD	LoF	?Dyskeratosis congenita, autosomal dominant 6 (616553) (AD, AR);?Dyskeratosis congenita, autosomal recessive 7 (616553) (AD, AR)	Familial pulmonary fibrosis (AD ) (Respiratory); Haematological malignancies for rare disease (AD ) (Neoplasm); Cytopenia - NOT Fanconi anaemia (AD ) (Blood/Immune); COVID-19 research (AD ) (Blood/Immune)	3
ACE	LoF	[Angiotensin I-converting enzyme, benign serum increase];{Microvascular complications of diabetes 3} (612624);{Myocardial infarction, susceptibility to};{SARS, progression of};{Stroke, hemorrhagic} (614519);Renal tubular dysgenesis (267430) (AR);[Angiotensin I-converting enzyme, benign serum increase];{Microvascular complications of diabetes 3} (612624);{Myocardial infarction, susceptibility to};…	Severe Paediatric Disorders (AR ) (-); Unexplained kidney failure in young people (AR ) (Genitourinary); Paediatric disorders - additional genes (AR ) (-); Fetal anomalies (AR ) (Congenital)	2
ACER3	LoF	?Leukodystrophy, progressive, early childhood-onset (617762) (AR)	DDG2P (AR ) (Congenital); White matter disorders and cerebral calcification - narrow panel (AR ) (Nervous)	2
ACO2	LoF	Infantile cerebellar-retinal degeneration (614559) (AR);Optic atrophy 9 (616289) (AD, AR)	Severe Paediatric Disorders (AD ) (-); Undiagnosed metabolic disorders (AD ) (Endocrine/Metabolic); Possible mitochondrial disorder - nuclear genes (AD ) (Endocrine/Metabolic); Optic neuropathy (AD ) (Eye); DDG2P (AR ) (Congenital); Ataxia and cerebellar anomalies - narrow panel (AD ) (Nervous)	4
ACOX1	LoF+GoF	Mitchell syndrome (618960) (AD);Peroxisomal acyl-CoA oxidase deficiency (264470) (AR)	Hereditary neuropathy or pain disorder (AD_GOF ) (Nervous); Severe Paediatric Disorders (AR ) (-); Peroxisomal disorders (AR ) (Endocrine/Metabolic); Fetal anomalies (AR ) (Congenital)	3
ACP4	LoF	Amelogenesis imperfecta, type IJ (617297) (AR)	Amelogenesis imperfecta (AR ) (Musculoskeletal/Connective)	1
ACP5	LoF	Spondyloenchondrodysplasia with immune dysregulation (607944) (AR)	Skeletal dysplasia (AR ) (Musculoskeletal/Connective); White matter disorders and cerebral calcification - narrow panel (AR ) (Nervous); Severe Paediatric Disorders (AR ) (-); Fetal anomalies (AR ) (Congenital); COVID-19 research (AR ) (Blood/Immune)	4
ACSF3	LoF	Combined malonic and methylmalonic aciduria (614265) (AR)	Severe Paediatric Disorders (AR ) (-); Undiagnosed metabolic disorders (AR ) (Endocrine/Metabolic)	1
ACSL4	LoF	Intellectual developmental disorder, X-linked 63 (300387) (XLD)	DDG2P (XLD ) (Congenital); Severe Paediatric Disorders (XLD ) (-); Intellectual disability - microarray and sequencing (XLD ) (Nervous)	2
ACTA1	LoF	?Myopathy, scapulohumeroperoneal (616852) (AD);Congenital myopathy 2A, typical, autosomal dominant (161800) (AD);Congenital myopathy 2B, severe infantile, autosomal recessive (620265) (AR);Congenital myopathy 2C, severe infantile, autosomal dominant (620278) (AD)	Fetal anomalies (AD ) (Congenital); Severe Paediatric Disorders (AD ) (-); Paediatric or syndromic cardiomyopathy (AD ) (Circulatory); Distal myopathies (AD ) (Musculoskeletal/Connective)	3
ACTA2	LoF	Aortic aneurysm, familial thoracic 6 (611788) (AD);Moyamoya disease 5 (614042);Smooth muscle dysfunction syndrome (613834) (AD)	Cerebral vascular malformations (AD ) (Congenital); Thoracic aortic aneurysm or dissection GMS (AD ) (Circulatory); Severe Paediatric Disorders (AD ) (-); Gastrointestinal neuromuscular disorders (AD ) (Digestive)	3
ACTB	LoF+GoF	Baraitser-Winter syndrome 1 (243310) (AD);Becker nevus, syndromic or isolated, somatic mosaic (604919);Congenital smooth muscle hamartoma with or without hemihypertrophy, somatic mosaic (620479);Dystonia-deafness syndrome 1 (607371) (AD);Thrombocytopenia 8, with dysmorphic features and developmental delay (620475) (AD)	Mosaic skin disorders - deep sequencing (AD ) (Skin); Severe Paediatric Disorders (AD ) (-); Rare syndromic craniosynostosis or isolated multisuture synostosis (AD ) (Musculoskeletal/Connective); Ocular coloboma (AD ) (Eye); Malformations of cortical development (AD ) (Nervous); Inherited bleeding disorders (AD ) (Blood/Immune); Fetal anomalies (AD ) (Congenital); COVID-19 research (AD ) (Blood/I…	6
ACTC1	LoF	Atrial septal defect 5 (612794) (AD);Cardiomyopathy, dilated, 1R (613424) (AD);Cardiomyopathy, hypertrophic, 11 (612098) (AD);Left ventricular noncompaction 4 (613424) (AD)	Fetal anomalies (AD ) (Congenital); Severe Paediatric Disorders (AD ) (-); Paediatric disorders - additional genes (AD ) (-); Left Ventricular Noncompaction Cardiomyopathy (AD ) (Circulatory)	2
ACTG1	LoF	Baraitser-Winter syndrome 2 (614583) (AD);Deafness, autosomal dominant 20/26 (604717) (AD)	Fetal anomalies (AD ) (Congenital); Severe Paediatric Disorders (AD ) (-); Rare syndromic craniosynostosis or isolated multisuture synostosis (AD ) (Musculoskeletal/Connective); Ocular coloboma (AD ) (Eye); Monogenic hearing loss (AD ) (Ear); Malformations of cortical development (AD ) (Nervous)	5
ACTG2	LoF	Megacystis-microcolon-intestinal hypoperistalsis syndrome 5 (619431) (AD);Visceral myopathy 1 (155310) (AD)	Fetal anomalies (AD ) (Congenital); Unexplained kidney failure in young people (AD ) (Genitourinary); Severe Paediatric Disorders (AD ) (-); Paediatric disorders - additional genes (AD ) (-); Gastrointestinal neuromuscular disorders (AD ) (Digestive)	3
ACTL6A	LoF	-	Intellectual disability - microarray and sequencing (AD ) (Nervous)	1
ACTL6B	LoF+GoF	Developmental and epileptic encephalopathy 76 (618468) (AR);Intellectual developmental disorder with severe speech and ambulation defects (618470) (AD)	Severe Paediatric Disorders (AD_GOF ) (-); Intellectual disability - microarray and sequencing (AD_GOF ) (Nervous); DDG2P (AR ) (Congenital)	2
ACTN1	LoF	Bleeding disorder, platelet-type, 15 (615193) (AD)	Severe Paediatric Disorders (AD ) (-); Inherited bleeding disorders (AD ) (Blood/Immune)	1
ACTN2	LoF	Cardiomyopathy, dilated, 1AA, with or without LVNC (612158) (AD);Cardiomyopathy, hypertrophic, 23, with or without LVNC (612158) (AD);Congenital myopathy 8 (618654) (AD);Myopathy, distal, 6, adult onset (618655) (AD)	Congenital myopathy (AD ) (Musculoskeletal/Connective); Hypertrophic cardiomyopathy (AD ) (Circulatory)	2
ACTN4	LoF	Glomerulosclerosis, focal segmental, 1 (603278) (AD)	Severe Paediatric Disorders (AD ) (-); Unexplained kidney failure in young people (AD ) (Genitourinary)	1
ACVR1	LoF	Fibrodysplasia ossificans progressiva (135100) (AD)	DDG2P (AD ) (Congenital); Skeletal dysplasia (AD ) (Musculoskeletal/Connective); Severe Paediatric Disorders (AD ) (-)	2
ACVR2B	LoF	Heterotaxy, visceral, 4, autosomal (613751)	Fetal anomalies (AD ) (Congenital); Severe Paediatric Disorders (AD ) (-); Paediatric disorders - additional genes (AD ) (-)	1
ACVRL1	LoF	Telangiectasia, hereditary hemorrhagic, type 2 (600376) (AD)	Cerebral vascular malformations (AD ) (Congenital); Vascular skin disorders (AD ) (Skin); Severe Paediatric Disorders (AD ) (-); Inherited bleeding disorders (AD ) (Blood/Immune); Hereditary haemorrhagic telangiectasia (AD ) (Circulatory)	4
ACY1	LoF	Aminoacylase 1 deficiency (609924) (AR)	Severe Paediatric Disorders (AR ) (-); Undiagnosed metabolic disorders (AR ) (Endocrine/Metabolic); Intellectual disability - microarray and sequencing (AR ) (Nervous); Fetal anomalies (AR ) (Congenital)	3
ADA	LoF	Adenosine deaminase deficiency, partial (102700) (AR, SMo);Severe combined immunodeficiency due to ADA deficiency (102700) (AR, SMo);Adenosine deaminase deficiency, partial (102700) (AR, SMo);Severe combined immunodeficiency due to ADA deficiency (102700) (AR, SMo)	Severe Paediatric Disorders (AR ) (-); Undiagnosed metabolic disorders (AR ) (Endocrine/Metabolic); Infantile enterocolitis & monogenic inflammatory bowel disease (AR ) (Digestive); DDG2P (AR ) (Congenital); COVID-19 research (AR ) (Blood/Immune)	4
ADA2	LoF	Sneddon syndrome (182410) (AR);Vasculitis, autoinflammation, immunodeficiency, and hematologic defects syndrome (615688) (AR)	Rare genetic inflammatory skin disorders (AR ) (Skin); Severe Paediatric Disorders (AR ) (-); Cytopenias and congenital anaemias (AR ) (Blood/Immune); COVID-19 research (AR ) (Blood/Immune); Autoinflammatory disorders (AR ) (Musculoskeletal/Connective)	3
ADAM10	LoF	{Alzheimer disease 18, susceptibility to} (615590);Reticulate acropigmentation of Kitamura (615537) (AD)	Pigmentary skin disorders (AD ) (Skin)	1
ADAM17	LoF	?Inflammatory skin and bowel disease, neonatal, 1 (614328) (AR)	Palmoplantar keratodermas (AR ) (Skin); Infantile enterocolitis & monogenic inflammatory bowel disease (AR ) (Digestive); COVID-19 research (AR ) (Blood/Immune)	3
ADAM22	LoF	Developmental and epileptic encephalopathy 61 (617933) (AR)	Intellectual disability - microarray and sequencing (AR ) (Nervous); DDG2P (AR ) (Congenital)	2
ADAM9	LoF	Cone-rod dystrophy 9 (612775) (AR)	Retinal disorders (AR ) (Eye)	1
ADAMTS10	LoF	Weill-Marchesani syndrome 1, recessive (277600) (AR)	Skeletal dysplasia (AR ) (Musculoskeletal/Connective); Severe Paediatric Disorders (AR ) (-); Glaucoma developmental (AR ) (Eye); Fetal anomalies (AR ) (Congenital); Arthrogryposis (AR ) (Musculoskeletal/Connective)	3
ADAMTS13	LoF	Thrombotic thrombocytopenic purpura, hereditary (274150) (AR)	Vascular skin disorders (AR ) (Skin); Severe Paediatric Disorders (AR ) (-); Inherited bleeding disorders (AR ) (Blood/Immune)	2
ADAMTS15	LoF	Arthrogryposis, distal, type 12 (620545) (AR)	Arthrogryposis (AR ) (Musculoskeletal/Connective)	1
ADAMTS17	LoF	Weill-Marchesani 4 syndrome, recessive (613195) (AR)	Skeletal dysplasia (AR ) (Musculoskeletal/Connective); Severe Paediatric Disorders (AR ) (-); Glaucoma developmental (AR ) (Eye); Fetal anomalies (AR ) (Congenital)	3
ADAMTS18	LoF	Microcornea, myopic chorioretinal atrophy, and telecanthus (615458) (AR)	Corneal abnormalities (AR ) (Eye); DDG2P (AR ) (Congenital)	2
ADAMTS19	LoF	Cardiac valvular dysplasia 2 (620067) (AR)	Familial non syndromic congenital heart disease (AR ) (Ear); Paediatric disorders - additional genes (AR ) (-)	1
ADAMTS2	LoF	Ehlers-Danlos syndrome, dermatosparaxis type (225410) (AR)	Ehlers Danlos syndrome with a likely monogenic cause (AR ) (Musculoskeletal/Connective)	1
ADAMTS3	LoF	Hennekam lymphangiectasia-lymphedema syndrome 3 (618154) (AR)	Intestinal failure or congenital diarrhoea (AR ) (Digestive); Primary lymphoedema (AR ) (Circulatory); Fetal anomalies (AR ) (Congenital)	3
ADAMTS9	LoF	-	DDG2P (AR ) (Congenital)	1
ADAMTSL2	LoF	Geleophysic dysplasia 1 (231050) (AR)	Skeletal dysplasia (AR ) (Musculoskeletal/Connective); Severe Paediatric Disorders (AR ) (-); Fetal anomalies (AR ) (Congenital)	2
ADAMTSL4	LoF	Ectopia lentis et pupillae (225200) (AR);Ectopia lentis, isolated, autosomal recessive (225100) (AR)	Rare syndromic craniosynostosis or isolated multisuture synostosis (AR ) (Musculoskeletal/Connective); Thoracic aortic aneurysm or dissection (AR ) (Circulatory); Structural eye disease (AR ) (Eye)	3
ADAR	LoF	Aicardi-Goutieres syndrome 6 (615010) (AR);Dyschromatosis symmetrica hereditaria (127400) (AD)	Fetal anomalies (AD ) (Congenital); Undiagnosed metabolic disorders (AD ) (Endocrine/Metabolic); Severe Paediatric Disorders (AD ) (-); Pigmentary skin disorders (AD ) (Skin); Early onset dystonia (AD ) (Nervous); COVID-19 research (AR ) (Blood/Immune)	5
ADARB1	LoF	Neurodevelopmental disorder with hypotonia, microcephaly, and seizures (618862) (AR)	Severe microcephaly (AR ) (Nervous)	1
ADAT3	LoF	Neurodevelopmental disorder with brain abnormalities, poor growth, and dysmorphic facies (615286) (AR)	Severe Paediatric Disorders (AR ) (-); Intellectual disability - microarray and sequencing (AR ) (Nervous)	1
ADCY5	LoF+GoF	Dyskinesia with orofacial involvement, autosomal dominant (606703) (AD);Dyskinesia with orofacial involvement, autosomal recessive (619647) (AR);Neurodevelopmental disorder with hyperkinetic movements and dyskinesia (619651) (AR)	DDG2P (AD ) (Congenital); Skeletal Muscle Channelopathies (AD ) (Musculoskeletal/Connective); Severe Paediatric Disorders (AD ) (-); Brain channelopathy (AD ) (Nervous)	3
ADCY6	LoF	Lethal congenital contracture syndrome 8 (616287) (AR)	Arthrogryposis (AR ) (Musculoskeletal/Connective)	1
ADD1	LoF	{Hypertension, essential, salt-sensitive} (145500) (Mu);{Hypertension, essential, salt-sensitive} (145500) (Mu);{Hypertension, essential, salt-sensitive} (145500) (Mu);{Hypertension, essential, salt-sensitive} (145500) (Mu);{Hypertension, essential, salt-sensitive} (145500) (Mu);{Hypertension, essential, salt-sensitive} (145500) (Mu);{Hypertension, essential, salt-sensitive} (145500) (Mu);{Hypert…	Intellectual disability - microarray and sequencing (AD ) (Nervous)	1
ADD3	LoF	Cerebral palsy, spastic quadriplegic, 3 (617008) (AR)	Severe Paediatric Disorders (AR ) (-); Intellectual disability - microarray and sequencing (AR ) (Nervous)	1
ADGRG1	LoF	Cortical dysplasia, complex, with other brain malformations 14A, (bilateral frontoparietal) (606854) (AR);Cortical dysplasia, complex, with other brain malformations 14B, (bilateral perisylvian) (615752)	Severe Paediatric Disorders (AD ) (-); Fetal anomalies (AR ) (Congenital); Ataxia and cerebellar anomalies - narrow panel (AR ) (Nervous)	2
ADGRG6	LoF	Lethal congenital contracture syndrome 9 (616503) (AR)	Severe Paediatric Disorders (AR ) (-); Fetal anomalies (AR ) (Congenital); Arthrogryposis (AR ) (Musculoskeletal/Connective)	2
ADGRV1	LoF	?Febrile seizures, familial, 4 (604352) (AD);Usher syndrome, type 2C (605472) (AR, DD);Usher syndrome, type 2C, GPR98/PDZD7 digenic (605472) (AR, DD);?Febrile seizures, familial, 4 (604352) (AD);Usher syndrome, type 2C (605472) (AR, DD);Usher syndrome, type 2C, GPR98/PDZD7 digenic (605472) (AR, DD)	Severe Paediatric Disorders (AR ) (-); Retinal disorders (AR ) (Eye); Monogenic hearing loss (AR ) (Ear)	2
ADK	LoF	Hypermethioninemia due to adenosine kinase deficiency (614300) (AR)	Severe Paediatric Disorders (AR ) (-); Neonatal cholestasis (AR ) (Digestive); Intellectual disability - microarray and sequencing (AR ) (Nervous)	2
ADNP	LoF	Helsmoortel-van der Aa syndrome (615873) (AD);Helsmoortel-van der Aa syndrome (615873) (AD)	Severe Paediatric Disorders (AD ) (-); Intellectual disability - microarray and sequencing (AD ) (Nervous); Fetal anomalies (AD ) (Congenital)	2
ADPRS	LoF	Neurodegeneration, childhood-onset, stress-induced, with variable ataxia and seizures (618170) (AR)	DDG2P (AR ) (Congenital); Severe Paediatric Disorders (AR ) (-); Ataxia and cerebellar anomalies - narrow panel (AR ) (Nervous)	2
ADSL	LoF	Adenylosuccinase deficiency (103050) (AR)	Severe Paediatric Disorders (AR ) (-); Undiagnosed metabolic disorders (AR ) (Endocrine/Metabolic); Fetal anomalies (AR ) (Congenital); Early onset or syndromic epilepsy (AR ) (Nervous)	3
ADSS1	LoF	Myopathy, distal, 5 (617030) (AR)	Distal myopathies (AR ) (Musculoskeletal/Connective)	1
AEBP1	LoF	Ehlers-Danlos syndrome, classic-like, 2 (618000) (AR)	Ehlers Danlos syndrome with a likely monogenic cause (AR ) (Musculoskeletal/Connective)	1
AFF2	LoF	Intellectual developmental disorder, X-linked 109 (309548) (XLR)	DDG2P (XLR ) (Congenital); Severe Paediatric Disorders (XLR ) (-); Intellectual disability - microarray and sequencing (XLR ) (Nervous)	2
AFF3	LoF	KINSSHIP syndrome (619297) (AD)	DDG2P (AD ) (Congenital); Skeletal dysplasia (AD ) (Musculoskeletal/Connective); Early onset or syndromic epilepsy (AD ) (Nervous)	3
AFF4	GoF	CHOPS syndrome (616368) (AD)	Severe Paediatric Disorders (AD_GOF ) (-); Intellectual disability - microarray and sequencing (AD_GOF ) (Nervous); Fetal anomalies (AD_GOF ) (Congenital)	2
AFG2A	LoF	Neurodevelopmental disorder with hearing loss, seizures, and brain abnormalities (616577) (AR)	Severe Paediatric Disorders (AR ) (-); Monogenic hearing loss (AR ) (Ear); Fetal anomalies (AR ) (Congenital); Early onset or syndromic epilepsy (AR ) (Nervous)	3
AFG2B	LoF	Deafness, autosomal recessive 119 (619615) (AR);Neurodevelopmental disorder with hearing loss and spasticity (619616) (AR)	Early onset dystonia (AR ) (Nervous); Monogenic hearing loss (AR ) (Ear); DDG2P (AR ) (Congenital)	3
AFG3L2	LoF	Optic atrophy 12 (618977) (AD);Spastic ataxia 5, autosomal recessive (614487) (AR);Spinocerebellar ataxia 28 (610246) (AD)	Severe Paediatric Disorders (AD ) (-); Undiagnosed metabolic disorders (AD ) (Endocrine/Metabolic); Optic neuropathy (AD ) (Eye); Mitochondrial DNA maintenance disorder (AD ) (Endocrine/Metabolic); Early onset dystonia (AD ) (Nervous)	3
AGA	LoF	Aspartylglucosaminuria (208400) (AR)	Skeletal dysplasia (AR ) (Musculoskeletal/Connective); Severe Paediatric Disorders (AR ) (-); Lysosomal storage disorder (AR ) (Endocrine/Metabolic); Intellectual disability - microarray and sequencing (AR ) (Nervous); DDG2P (AR ) (Congenital)	4
AGBL5	LoF	Retinitis pigmentosa 75 (617023) (AR)	Retinal disorders (AR ) (Eye)	1
AGK	LoF	Cataract 38, autosomal recessive (614691) (AR);Sengers syndrome (212350) (AR)	Severe Paediatric Disorders (AR ) (-); Possible mitochondrial disorder - nuclear genes (AR ) (Endocrine/Metabolic); Peroxisomal disorders (AR ) (Endocrine/Metabolic); Paediatric or syndromic cardiomyopathy (AR ) (Circulatory); Fetal anomalies (AR ) (Congenital); Bilateral congenital or childhood onset cataracts (AR ) (Eye)	4
AGL	LoF	Glycogen storage disease IIIa (232400) (AR);Glycogen storage disease IIIb (232400) (AR)	Severe Paediatric Disorders (AR ) (-); Rhabdomyolysis and metabolic muscle disorders (AR ) (Musculoskeletal/Connective); Ketotic hypoglycaemia (AR ) (Endocrine/Metabolic); Glycogen storage disease (AR ) (Endocrine/Metabolic); Fetal anomalies (AR ) (Congenital)	3
AGO1	LoF	Neurodevelopmental disorder with language delay and behavioral abnormalities, with or without seizures (620292) (AD)	DDG2P (AD ) (Congenital); Intellectual disability - microarray and sequencing (AD ) (Nervous)	2
AGO2	LoF	Lessel-Kreienkamp syndrome (619149) (AD)	Intellectual disability - microarray and sequencing (AD ) (Nervous)	1
AGPAT2	LoF	Lipodystrophy, congenital generalized, type 1 (608594) (AR)	Lipodystrophy - childhood onset (AR ) (Endocrine/Metabolic); Diabetes with additional phenotypes suggestive of a monogenic aetiology (AR ) (Endocrine/Metabolic)	1
AGPS	LoF	Rhizomelic chondrodysplasia punctata, type 3 (600121) (AR)	Chondrodysplasia punctata (AR ) (Musculoskeletal/Connective); Severe Paediatric Disorders (AR ) (-); Peroxisomal disorders (AR ) (Endocrine/Metabolic); Fetal anomalies (AR ) (Congenital); Bilateral congenital or childhood onset cataracts (AR ) (Eye)	4
AGR2	LoF	Respiratory infections, recurrent, and failure to thrive with or without diarrhea (620233) (AR)	Respiratory ciliopathies including non-CF bronchiectasis (AR ) (Respiratory); Primary immunodeficiency or monogenic inflammatory bowel disease (AR ) (Blood/Immune); Intestinal failure or congenital diarrhoea (AR ) (Digestive)	3
AGRN	LoF	Myasthenic syndrome, congenital, 8, with pre- and postsynaptic defects (615120) (AR)	Severe Paediatric Disorders (AR ) (-); Other rare neuromuscular disorders (AR ) (Musculoskeletal/Connective)	1
AGT	LoF	Renal tubular dysgenesis (267430) (AR);Renal tubular dysgenesis (267430) (AR)	Severe Paediatric Disorders (AR ) (-); Unexplained kidney failure in young people (AR ) (Genitourinary); Paediatric disorders - additional genes (AR ) (-)	1
AGTPBP1	LoF	Neurodegeneration, childhood-onset, with cerebellar atrophy (618276) (AR)	Hereditary neuropathy (AR ) (Nervous); DDG2P (AR ) (Congenital)	2
AGTR1	LoF+GoF	{Hypertension, essential} (145500) (Mu);Renal tubular dysgenesis (267430) (AR);{Hypertension, essential} (145500) (Mu);Renal tubular dysgenesis (267430) (AR);{Hypertension, essential} (145500) (Mu);Renal tubular dysgenesis (267430) (AR);{Hypertension, essential} (145500) (Mu);Renal tubular dysgenesis (267430) (AR);{Hypertension, essential} (145500) (Mu);Renal tubular dysgenesis (267430) (AR);{Hyp…	Severe Paediatric Disorders (AR ) (-); Unexplained kidney failure in young people (AR ) (Genitourinary); Paediatric disorders - additional genes (AR ) (-); Fetal anomalies (AR ) (Congenital)	2
AGXT	LoF	Hyperoxaluria, primary, type 1 (259900) (AR)	Severe Paediatric Disorders (AR ) (-); Peroxisomal disorders (AR ) (Endocrine/Metabolic); Nephrocalcinosis or nephrolithiasis (AR ) (Genitourinary); DDG2P (AR ) (Congenital)	3
AHCY	LoF	Hypermethioninemia with deficiency of S-adenosylhomocysteine hydrolase (613752) (AR);Hypermethioninemia with deficiency of S-adenosylhomocysteine hydrolase (613752) (AR)	Intellectual disability - microarray and sequencing (AR ) (Nervous); Undiagnosed metabolic disorders (AR ) (Endocrine/Metabolic); Fetal hydrops (AR ) (Congenital)	3
AHDC1	LoF	Xia-Gibbs syndrome (615829) (AD)	Rare syndromic craniosynostosis or isolated multisuture synostosis (AD ) (Musculoskeletal/Connective); Severe Paediatric Disorders (AD ) (-); Intellectual disability - microarray and sequencing (AD ) (Nervous); Fetal anomalies (AD ) (Congenital)	3
AHI1	LoF	Joubert syndrome 3 (608629) (AR)	Severe Paediatric Disorders (AR ) (-); Unexplained young onset end-stage renal disease (AR ) (Genitourinary); Retinal disorders (AR ) (Eye); Rare multisystem ciliopathy disorders (AR ) (Congenital); Intellectual disability - microarray and sequencing (AR ) (Nervous); Fetal anomalies (AR ) (Congenital)	4
AICDA	LoF	Immunodeficiency with hyper-IgM, type 2 (605258) (AR)	COVID-19 research (AD ) (Blood/Immune); Severe Paediatric Disorders (AR ) (-); Infantile enterocolitis & monogenic inflammatory bowel disease (AR ) (Digestive)	2
AIFM1	LoF	Combined oxidative phosphorylation deficiency 6 (300816) (XLR);Cowchock syndrome (310490) (XLR);Deafness, X-linked 5 (300614) (XLR);Spondyloepimetaphyseal dysplasia, X-linked, with hypomyelinating leukodystrophy (300232) (XLR)	DDG2P (XLR ) (Congenital); White matter disorders and cerebral calcification - narrow panel (XLR ) (Nervous); Undiagnosed metabolic disorders (XLR ) (Endocrine/Metabolic); Severe Paediatric Disorders (XLR ) (-); Possible mitochondrial disorder - nuclear genes (XLR ) (Endocrine/Metabolic); Monogenic hearing loss (XLR ) (Ear); Mitochondrial disorders (XLR ) (Endocrine/Metabolic); Likely inborn erro…	4
AIMP1	LoF	Leukodystrophy, hypomyelinating, 3 (260600) (AR)	Severe Paediatric Disorders (AR ) (-); White matter disorders and cerebral calcification - narrow panel (AR ) (Nervous); DDG2P (AR ) (Congenital)	2
AIP	LoF	Pituitary adenoma 1, multiple types (102200) (AD, SMu);Pituitary adenoma predisposition (102200) (AD, SMu)	Adult solid tumours for rare disease (AD ) (Neoplasm)	1
AIPL1	LoF	Cone-rod dystrophy (604393) (AD, AR);Leber congenital amaurosis 4 (604393) (AD, AR);Retinitis pigmentosa, juvenile (604393) (AD, AR)	Retinal disorders (AD ) (Eye); Severe Paediatric Disorders (AR ) (-); DDG2P (AR ) (Congenital)	2
AIRE	LoF	Autoimmune polyendocrinopathy syndrome , type I, with or without reversible metaphyseal dysplasia (240300) (AD, AR)	Severe Paediatric Disorders (AD ) (-); Retinal disorders (AD ) (Eye); Rare genetic inflammatory skin disorders (AR ) (Skin); Familial hypoparathyroidism (AD ) (Endocrine/Metabolic); DDG2P (AR ) (Congenital); COVID-19 research (AD ) (Blood/Immune); Autoimmune Polyendocrine Syndrome (AD ) (Endocrine/Metabolic)	5
AK1	LoF	Hemolytic anemia due to adenylate kinase deficiency (612631) (AR)	Severe Paediatric Disorders (AR ) (-); Cytopenias and congenital anaemias (AR ) (Blood/Immune)	1
AK2	LoF	Reticular dysgenesis (267500) (AR)	DDG2P (AR ) (Congenital); Severe Paediatric Disorders (AR ) (-); Cytopenia - NOT Fanconi anaemia (AR ) (Blood/Immune); COVID-19 research (AR ) (Blood/Immune)	2
AKR1D1	LoF	Bile acid synthesis defect, congenital, 2 (235555) (AR)	Severe Paediatric Disorders (AR ) (-); Undiagnosed metabolic disorders (AR ) (Endocrine/Metabolic); Neonatal cholestasis (AR ) (Digestive); DDG2P (AR ) (Congenital)	3
AKT1	GoF	Breast cancer, somatic (114480);Colorectal cancer, somatic (114500);Cowden syndrome 6 (615109);Ovarian cancer, somatic (167000);Proteus syndrome, somatic (176920);Breast cancer, somatic (114480);Colorectal cancer, somatic (114500);Cowden syndrome 6 (615109);Ovarian cancer, somatic (167000);Proteus syndrome, somatic (176920);Breast cancer, somatic (114480);Colorectal cancer, somatic (114500);Cowde…	Mosaic skin disorders - deep sequencing (AD_GOF ) (Skin); Severe Paediatric Disorders (AD_GOF ) (-); Segmental overgrowth disorders - Deep sequencing (AD_GOF ) (Congenital); Neurological segmental overgrowth (AD_GOF ) (Nervous)	3
AKT2	LoF	Diabetes mellitus, type II (125853) (AD);Hypoinsulinemic hypoglycemia with hemihypertrophy (240900) (AD);Diabetes mellitus, type II (125853) (AD);Hypoinsulinemic hypoglycemia with hemihypertrophy (240900) (AD);Diabetes mellitus, type II (125853) (AD);Hypoinsulinemic hypoglycemia with hemihypertrophy (240900) (AD);Diabetes mellitus, type II (125853) (AD);Hypoinsulinemic hypoglycemia with hemihyper…	Beckwith-Wiedemann syndrome BWS and other congenital overgrowth disorders (AD ) (Congenital); Congenital hyperinsulinism (AD ) (Endocrine/Metabolic)	2
AKT3	LoF	Megalencephaly-polymicrogyria-polydactyly-hydrocephalus syndrome 2 (615937) (AD)	Segmental overgrowth disorders - Deep sequencing (AD ) (Congenital); Severe Paediatric Disorders (AD ) (-); Hydrocephalus (AD ) (Nervous)	2
ALAD	LoF	{Lead poisoning, susceptibility to} (612740) (AR);Porphyria, acute hepatic (612740) (AR)	Cutaneous photosensitivity with a likely genetic cause (AR ) (Skin); Severe Paediatric Disorders (AR ) (-); Non-acute porphyrias (AR ) (Endocrine/Metabolic)	2
ALAS2	GoF	Anemia, sideroblastic, 1 (300751) (XLR);Protoporphyria, erythropoietic, X-linked (300752) (XL)	Cutaneous photosensitivity with a likely genetic cause (XLR_GOF ) (Skin); Vascular skin disorders (XLR_GOF ) (Skin); Undiagnosed metabolic disorders (XLR_GOF ) (Endocrine/Metabolic); Severe Paediatric Disorders (XLR_GOF ) (-); Rare anaemia (XLR_GOF ) (Blood/Immune); Non-acute porphyrias (XLR_GOF ) (Endocrine/Metabolic); Likely inborn error of metabolism - targeted testing not possible (XLR_GOF ) …	3
ALB	LoF	?[Dysalbuminemic hypertriiodothyroninemia] (615999) (AD, AR);[Dysalbuminemic hyperthyroxinemia] (615999) (AD, AR);Analbuminemia (616000) (AR)	Severe Paediatric Disorders (AD ) (-); Hyperthyroidism (AD ) (Endocrine/Metabolic)	1
ALDH18A1	LoF	Cutis laxa, autosomal dominant 3 (616603) (AD);Cutis laxa, autosomal recessive, type IIIA (219150) (AR);Spastic paraplegia 9A, autosomal dominant (601162) (AD);Spastic paraplegia 9B, autosomal recessive (616586) (AR)	Fetal anomalies (AD ) (Congenital); Undiagnosed metabolic disorders (AD ) (Endocrine/Metabolic); Severe Paediatric Disorders (AD ) (-); Hereditary spastic paraplegia (AD ) (Nervous); Ehlers Danlos syndrome with a likely monogenic cause (AD ) (Musculoskeletal/Connective); Bilateral congenital or childhood onset cataracts (AD ) (Eye)	5
ALDH1A2	LoF	Diaphragmatic hernia 4, with cardiovascular defects (620025) (AR)	DDG2P (AR ) (Congenital)	1
ALDH1A3	LoF	Microphthalmia, isolated 8 (615113) (AR)	Severe Paediatric Disorders (AR ) (-); Ocular coloboma (AR ) (Eye); Fetal anomalies (AR ) (Congenital)	2
ALDH3A2	LoF	Sjogren-Larsson syndrome (270200) (AR)	Autosomal recessive congenital ichthyosis (AR ) (Skin); White matter disorders and cerebral calcification - narrow panel (AR ) (Nervous); Undiagnosed metabolic disorders (AR ) (Endocrine/Metabolic); Severe Paediatric Disorders (AR ) (-); Retinal disorders (AR ) (Eye); Fetal anomalies (AR ) (Congenital)	5
ALDH4A1	LoF	Hyperprolinemia, type II (239510) (AR)	Severe Paediatric Disorders (AR ) (-); Undiagnosed metabolic disorders (AR ) (Endocrine/Metabolic); Intellectual disability - microarray and sequencing (AR ) (Nervous); DDG2P (AR ) (Congenital)	3
ALDH5A1	LoF	Succinic semialdehyde dehydrogenase deficiency (271980) (AR)	Severe Paediatric Disorders (AR ) (-); Undiagnosed metabolic disorders (AR ) (Endocrine/Metabolic); Neurotransmitter disorders (AR ) (Nervous); DDG2P (AR ) (Congenital)	3
ALDH6A1	LoF	Methylmalonate semialdehyde dehydrogenase deficiency (614105) (AR)	Severe Paediatric Disorders (AR ) (-); Undiagnosed metabolic disorders (AR ) (Endocrine/Metabolic)	1
ALDH7A1	LoF	Epilepsy, early-onset, 4, vitamin B6-dependent (266100) (AR)	Severe Paediatric Disorders (AR ) (-); Undiagnosed metabolic disorders (AR ) (Endocrine/Metabolic); Fetal anomalies (AR ) (Congenital); Early onset or syndromic epilepsy (AR ) (Nervous)	3
ALDOA	LoF	Glycogen storage disease XII (611881) (AR)	Severe Paediatric Disorders (AR ) (-); Rhabdomyolysis and metabolic muscle disorders (AR ) (Musculoskeletal/Connective); Ketotic hypoglycaemia (AR ) (Endocrine/Metabolic); Glycogen storage disease (AR ) (Endocrine/Metabolic); Fetal anomalies (AR ) (Congenital); Cytopenias and congenital anaemias (AR ) (Blood/Immune)	4
ALDOB	LoF	Fructose intolerance, hereditary (229600) (AR)	Severe Paediatric Disorders (AR ) (-); Neonatal cholestasis (AR ) (Digestive); Ketotic hypoglycaemia (AR ) (Endocrine/Metabolic); Glycogen storage disease (AR ) (Endocrine/Metabolic)	2
ALG1	LoF	Congenital disorder of glycosylation, type Ik (608540) (AR)	Severe Paediatric Disorders (AR ) (-); Fetal anomalies (AR ) (Congenital); Early onset or syndromic epilepsy (AR ) (Nervous); Congenital disorders of glycosylation (AR ) (Endocrine/Metabolic)	3
ALG11	LoF	Congenital disorder of glycosylation, type Ip (613661) (AR)	DDG2P (AR ) (Congenital); Severe Paediatric Disorders (AR ) (-); Early onset or syndromic epilepsy (AR ) (Nervous); Congenital disorders of glycosylation (AR ) (Endocrine/Metabolic)	3
ALG12	LoF	Congenital disorder of glycosylation, type Ig (607143) (AR)	Skeletal dysplasia (AR ) (Musculoskeletal/Connective); Severe Paediatric Disorders (AR ) (-); Intellectual disability - microarray and sequencing (AR ) (Nervous); Fetal anomalies (AR ) (Congenital); Congenital disorders of glycosylation (AR ) (Endocrine/Metabolic)	4
ALG13	GoF	Developmental and epileptic encephalopathy 36 (300884) (XL)	Severe Paediatric Disorders (XLD_GOF ) (-); Intellectual disability - microarray and sequencing (XLD_GOF ) (Nervous); Early onset or syndromic epilepsy (XLD_GOF ) (Nervous); DDG2P (XLD_GOF ) (Congenital)	2
ALG14	LoF	?Myasthenic syndrome, congenital, 15, without tubular aggregates (616227) (AR);Intellectual developmental disorder with epilepsy, behavioral abnormalities, and coarse facies (619031) (AR);Myopathy, epilepsy, and progressive cerebral atrophy (619036) (AR)	Congenital myaesthenic syndrome (AR ) (Musculoskeletal/Connective); Early onset or syndromic epilepsy (AR ) (Nervous); Congenital disorders of glycosylation (AR ) (Endocrine/Metabolic)	3
ALG2	LoF	Congenital disorder of glycosylation, type Ii (607906) (AR);Myasthenic syndrome, congenital, 14, with tubular aggregates (616228) (AR)	Congenital myaesthenic syndrome (AR ) (Musculoskeletal/Connective); Fetal anomalies (AR ) (Congenital)	2
ALG3	LoF	Congenital disorder of glycosylation, type Id (601110) (AR)	Skeletal dysplasia (AR ) (Musculoskeletal/Connective); Severe Paediatric Disorders (AR ) (-); Fetal anomalies (AR ) (Congenital); Early onset or syndromic epilepsy (AR ) (Nervous); Congenital disorders of glycosylation (AR ) (Endocrine/Metabolic); Arthrogryposis (AR ) (Musculoskeletal/Connective)	4
ALG5	LoF	Polycystic kidney disease 7 (620056) (AD)	Cystic kidney disease (AD ) (Genitourinary)	1
ALG6	LoF	Congenital disorder of glycosylation, type Ic (603147) (AR)	Severe Paediatric Disorders (AR ) (-); Fetal anomalies (AR ) (Congenital); Early onset or syndromic epilepsy (AR ) (Nervous); Congenital disorders of glycosylation (AR ) (Endocrine/Metabolic)	3
ALG8	LoF	Congenital disorder of glycosylation, type Ih (608104) (AR);Polycystic liver disease 3 with or without kidney cysts (617874) (AD)	Ductal plate malformation (AD ) (Congenital); Severe Paediatric Disorders (AD ) (-); Polycystic liver disease (AD ) (Digestive); Early onset or syndromic epilepsy (AR ) (Nervous); Cystic kidney disease (AD ) (Genitourinary); Congenital disorders of glycosylation (AR ) (Endocrine/Metabolic)	5
ALG9	LoF	Congenital disorder of glycosylation, type Il (608776) (AR);Gillessen-Kaesbach-Nishimura syndrome (263210) (AR)	Cystic kidney disease (AD ) (Genitourinary); Skeletal dysplasia (AR ) (Musculoskeletal/Connective); Severe Paediatric Disorders (AR ) (-); Fetal anomalies (AR ) (Congenital); Early onset or syndromic epilepsy (AR ) (Nervous); Congenital disorders of glycosylation (AR ) (Endocrine/Metabolic)	5
ALK	LoF	{Neuroblastoma, susceptibility to, 3} (613014)	Childhood solid tumours (AD ) (Neoplasm)	1
ALKBH8	LoF	Intellectual developmental disorder, autosomal recessive 71 (618504) (AR)	Severe Paediatric Disorders (AR ) (-); Early onset or syndromic epilepsy (AR ) (Nervous); DDG2P (AR ) (Congenital)	2
ALMS1	LoF	Alstrom syndrome (203800) (AR)	Severe Paediatric Disorders (AR ) (-); Unexplained young onset end-stage renal disease (AR ) (Genitourinary); Severe early-onset obesity (AR ) (Endocrine/Metabolic); Retinal disorders (AR ) (Eye); Rare multisystem ciliopathy disorders (AR ) (Congenital); Paediatric or syndromic cardiomyopathy (AR ) (Circulatory); Monogenic hearing loss (AR ) (Ear); Intellectual disability - microarray and sequenc…	7
ALOX12B	LoF	Ichthyosis, congenital, autosomal recessive 2 (242100) (AR)	Palmoplantar keratoderma and erythrokeratodermas (AR ) (Skin); Severe Paediatric Disorders (AR ) (-); Fetal anomalies (AR ) (Congenital)	2
ALOXE3	LoF	Ichthyosis, congenital, autosomal recessive 3 (606545) (AR)	Palmoplantar keratoderma and erythrokeratodermas (AR ) (Skin); Severe Paediatric Disorders (AR ) (-); Fetal anomalies (AR ) (Congenital)	2
ALPI	LoF	-	COVID-19 research (AR ) (Blood/Immune)	1
ALPK1	GoF	ROSAH syndrome (614979) (AD)	Primary immunodeficiency or monogenic inflammatory bowel disease (AD_GOF ) (Blood/Immune); Optic neuropathy (AD_GOF ) (Eye)	2
ALPK3	LoF	Cardiomyopathy, familial hypertrophic 27 (618052) (AR)	Hypertrophic cardiomyopathy (AR ) (Circulatory)	1
ALPL	LoF	Hypophosphatasia, adult (146300) (AD, AR);Hypophosphatasia, childhood (241510) (AR);Hypophosphatasia, infantile (241500) (AR);Odontohypophosphatasia (146300) (AD, AR)	Skeletal dysplasia (AD ) (Musculoskeletal/Connective); Undiagnosed metabolic disorders (AD ) (Endocrine/Metabolic); Severe Paediatric Disorders (AD ) (-); Fetal anomalies (AD ) (Congenital); Early onset or syndromic epilepsy (AR ) (Nervous)	4
ALS2	LoF	Amyotrophic lateral sclerosis 2, juvenile (205100) (AR);Primary lateral sclerosis, juvenile (606353) (AR);Spastic paralysis, infantile onset ascending (607225) (AR)	Severe Paediatric Disorders (AR ) (-); Hereditary spastic paraplegia (AR ) (Nervous); DDG2P (AR ) (Congenital); Amyotrophic lateral sclerosis/motor neuron disease (AR ) (Musculoskeletal/Connective)	3
ALX1	LoF	Frontonasal dysplasia 3 (613456) (AR)	Skeletal dysplasia (AR ) (Musculoskeletal/Connective); Severe Paediatric Disorders (AR ) (-); Fetal anomalies (AR ) (Congenital)	2
ALX3	LoF	Frontonasal dysplasia 1 (136760) (AR)	Skeletal dysplasia (AR ) (Musculoskeletal/Connective); Severe Paediatric Disorders (AR ) (-); Fetal anomalies (AR ) (Congenital)	2
ALX4	GoF	{Craniosynostosis 5, susceptibility to} (615529) (AD);Frontonasal dysplasia 2 (613451) (AR);Parietal foramina 2 (609597) (AD)	Skeletal dysplasia (AD_GOF ) (Musculoskeletal/Connective); Severe Paediatric Disorders (AD_GOF ) (-); Fetal anomalies (AD_GOF ) (Congenital)	2
AMACR	LoF	Alpha-methylacyl-CoA racemase deficiency (614307) (AR);Bile acid synthesis defect, congenital, 4 (214950) (AR)	Severe Paediatric Disorders (AR ) (-); Retinal disorders (AR ) (Eye); Peroxisomal disorders (AR ) (Endocrine/Metabolic); Fetal anomalies (AR ) (Congenital); Cholestasis (AR ) (Digestive)	4
AMBN	LoF	Amelogenesis imperfecta, type IF (616270) (AR)	Amelogenesis imperfecta (AR ) (Musculoskeletal/Connective)	1
AMELX	LoF	Amelogenesis imperfecta, type 1E (301200) (XLD)	Amelogenesis imperfecta (XLD ) (Musculoskeletal/Connective); Severe Paediatric Disorders (XLD ) (-)	1
AMER1	LoF	Osteopathia striata with cranial sclerosis (300373) (XLD)	Clefting (XLD ) (Musculoskeletal/Connective); Skeletal dysplasia (XLD ) (Musculoskeletal/Connective); Severe Paediatric Disorders (XLD ) (-); Osteopetrosis (XLD ) (Musculoskeletal/Connective); Intellectual disability - microarray and sequencing (XLD ) (Nervous); Fetal anomalies (XLD ) (Congenital); DDG2P (XLD ) (Congenital)	3
AMH	LoF	Persistent Mullerian duct syndrome, type I (261550) (AR);Persistent Mullerian duct syndrome, type I (261550) (AR)	Disorders of sex development (AR ) (Endocrine/Metabolic)	1
AMHR2	LoF	Persistent Mullerian duct syndrome, type II (261550) (AR);Persistent Mullerian duct syndrome, type II (261550) (AR)	Disorders of sex development (AR ) (Endocrine/Metabolic)	1
AMMECR1	LoF	Midface hypoplasia, hearing impairment, elliptocytosis, and nephrocalcinosis (300990) (XLR)	Severe Paediatric Disorders (XLR ) (-); IUGR and IGF abnormalities (XLR ) (Congenital); Fetal anomalies (XLR ) (Congenital)	1
AMN	LoF	Imerslund-Grasbeck syndrome 2 (618882) (AR)	Severe Paediatric Disorders (AR ) (-); Unexplained kidney failure in young people (AR ) (Genitourinary); Undiagnosed metabolic disorders (AR ) (Endocrine/Metabolic); Cytopenias and congenital anaemias (AR ) (Blood/Immune)	3
AMOTL1	LoF	-	DDG2P (AD ) (Congenital)	1
AMPD1	LoF	Myopathy due to myoadenylate deaminase deficiency (615511) (AR)	Rhabdomyolysis and metabolic muscle disorders (AR ) (Musculoskeletal/Connective)	1
AMPD2	LoF	?Spastic paraplegia 63, autosomal recessive (615686) (AR);Pontocerebellar hypoplasia, type 9 (615809) (AR)	Severe Paediatric Disorders (AR ) (-); Fetal anomalies (AR ) (Congenital); Ataxia and cerebellar anomalies - narrow panel (AR ) (Nervous)	2
AMT	LoF	Glycine encephalopathy 2 (620398)	Severe Paediatric Disorders (AR ) (-); Undiagnosed metabolic disorders (AR ) (Endocrine/Metabolic); Fetal anomalies (AR ) (Congenital); Early onset or syndromic epilepsy (AR ) (Nervous)	3
ANAPC1	LoF	Rothmund-Thomson syndrome, type 1 (618625) (AR)	Ectodermal dysplasia (AR ) (Skin); Fetal anomalies (AR ) (Congenital); Bilateral congenital or childhood onset cataracts (AR ) (Eye)	3
ANG	LoF	Amyotrophic lateral sclerosis 9 (611895)	Amyotrophic lateral sclerosis/motor neuron disease (AD ) (Musculoskeletal/Connective); Adult onset neurodegenerative disorder (AD ) (Nervous)	2
ANGPTL3	LoF	Hypobetalipoproteinemia, familial, 2 (605019) (AR)	Intestinal failure or congenital diarrhoea (AR ) (Digestive)	1
ANGPTL6	LoF	-	Cerebral vascular malformations (AD ) (Congenital)	1
ANK1	LoF	Spherocytosis, type 1 (182900) (AD, AR)	Severe Paediatric Disorders (AD ) (-); Cytopenias and congenital anaemias (AD ) (Blood/Immune)	1
ANK2	LoF	Cardiac arrhythmia, ankyrin-B-related (600919) (AD);Long QT syndrome 4 (600919) (AD)	Intellectual disability - microarray and sequencing (AD ) (Nervous)	1
ANK3	LoF	Intellectual developmental disorder, autosomal recessive 37 (615493) (AR)	Intellectual disability - microarray and sequencing (AD ) (Nervous)	1
ANKH	LoF	Chondrocalcinosis 2 (118600) (AD);Craniometaphyseal dysplasia (123000) (AD)	Fetal anomalies (AD ) (Congenital); Skeletal dysplasia (AD ) (Musculoskeletal/Connective); Severe Paediatric Disorders (AD ) (-)	2
ANKLE2	LoF	Microcephaly 16, primary, autosomal recessive (616681) (AR)	Severe microcephaly (AR ) (Nervous)	1
ANKRD11	LoF	KBG syndrome (148050) (AD)	IUGR and IGF abnormalities (AD ) (Congenital); Skeletal dysplasia (AD ) (Musculoskeletal/Connective); Severe Paediatric Disorders (AD ) (-); Early onset or syndromic epilepsy (AD ) (Nervous)	3
ANKRD17	LoF	Chopra-Amiel-Gordon syndrome (619504) (AD)	DDG2P (AD ) (Congenital); Intellectual disability - microarray and sequencing (AD ) (Nervous)	2
ANKRD26	GoF	Thrombocytopenia 2 (188000) (AD)	Severe Paediatric Disorders (AD_GOF ) (-); Inherited bleeding disorders (AD_GOF ) (Blood/Immune); Haematological malignancies for rare disease (AD_GOF ) (Neoplasm); DDG2P (AD_GOF ) (Congenital)	3
ANKS6	LoF	Nephronophthisis 16 (615382) (AR)	Severe Paediatric Disorders (AR ) (-); Tubulointerstitial kidney disease (AR ) (Genitourinary); Rare multisystem ciliopathy disorders (AR ) (Congenital); Fetal anomalies (AR ) (Congenital)	2
ANO10	LoF	Spinocerebellar ataxia, autosomal recessive 10 (613728) (AR)	Severe Paediatric Disorders (AR ) (-); Undiagnosed metabolic disorders (AR ) (Endocrine/Metabolic); Possible mitochondrial disorder - nuclear genes (AR ) (Endocrine/Metabolic); Ataxia and cerebellar anomalies - narrow panel (AR ) (Nervous)	2
ANO3	LoF	Dystonia 24 (615034) (AD)	Severe Paediatric Disorders (AD ) (-); Early onset dystonia (AD ) (Nervous)	1
ANO5	LoF+GoF	Gnathodiaphyseal dysplasia (166260) (AD);Miyoshi muscular dystrophy 3 (613319) (AR);Muscular dystrophy, limb-girdle, autosomal recessive 12 (611307) (AR)	DDG2P (AD_GOF ) (Congenital); Skeletal dysplasia (AD_GOF ) (Musculoskeletal/Connective); Severe Paediatric Disorders (AD_GOF ) (-); Distal myopathies (AR ) (Musculoskeletal/Connective)	2
ANO6	LoF	Scott syndrome (262890) (AR)	Severe Paediatric Disorders (AR ) (-); Inherited bleeding disorders (AR ) (Blood/Immune)	1
ANOS1	LoF	Hypogonadotropic hypogonadism 1 with or without anosmia (Kallmann syndrome 1) (308700) (XLR)	Fetal anomalies (XLR ) (Congenital); Unexplained young onset end-stage renal disease (XLR ) (Genitourinary); Severe Paediatric Disorders (XLR ) (-); Paediatric disorders - additional genes (XLR ) (-); Hypogonadotropic hypogonadism GMS (XLR ) (Endocrine/Metabolic); Hypogonadotropic hypogonadism (XLR ) (Endocrine/Metabolic); CAKUT (XLR ) (Genitourinary)	3
ANTXR1	LoF	{?Hemangioma, capillary infantile, susceptibility to} (602089) (AD);GAPO syndrome (230740) (AR);{?Hemangioma, capillary infantile, susceptibility to} (602089) (AD);GAPO syndrome (230740) (AR);{?Hemangioma, capillary infantile, susceptibility to} (602089) (AD);GAPO syndrome (230740) (AR)	Severe Paediatric Disorders (AR ) (-); Fetal anomalies (AR ) (Congenital)	1
ANTXR2	LoF	Hyaline fibromatosis syndrome (228600) (AR)	Skeletal dysplasia (AR ) (Musculoskeletal/Connective); Severe Paediatric Disorders (AR ) (-); Fetal anomalies (AR ) (Congenital); Arthrogryposis (AR ) (Musculoskeletal/Connective)	2
ANXA11	LoF	Amyotrophic lateral sclerosis 23 (617839) (AD);Inclusion body myopathy and brain white matter abnormalities (619733) (AD)	Adult onset neurodegenerative disorder (AD ) (Nervous)	1
AP1G1	LoF	Usmani-Riazuddin syndrome, autosomal dominant (619467) (AD);Usmani-Riazuddin syndrome, autosomal recessive (619548) (AR)	DDG2P (AD ) (Congenital); Early onset or syndromic epilepsy (AD ) (Nervous)	2
AP1S1	LoF	MEDNIK syndrome (609313) (AR)	Palmoplantar keratodermas (AR ) (Skin); Vici Syndrome and other autophagy disorders (AR ) (Congenital); Severe Paediatric Disorders (AR ) (-); Monogenic hearing loss (AR ) (Ear); Intestinal failure or congenital diarrhoea (AR ) (Digestive); Intellectual disability - microarray and sequencing (AR ) (Nervous)	5
AP1S2	LoF	Pettigrew syndrome (304340) (XLR)	Severe Paediatric Disorders (XLR ) (-); White matter disorders and cerebral calcification - narrow panel (XLR ) (Nervous); Structural basal ganglia disorders (XLR ) (Nervous); Intracerebral calcification disorders (XLR ) (Nervous); Intellectual disability - microarray and sequencing (XLR ) (Nervous); Hydrocephalus (XLR ) (Nervous); Hereditary ataxia (XLR ) (Nervous); Fetal anomalies (XLR ) (Conge…	2
AP1S3	LoF	{Psoriasis 15, pustular, susceptibility to} (616106) (AD)	COVID-19 research (AR ) (Blood/Immune)	1
AP2M1	LoF	Intellectual developmental disorder 60 with seizures (618587) (AD)	Severe Paediatric Disorders (AD ) (-); Early onset or syndromic epilepsy (AD ) (Nervous); DDG2P (AD ) (Congenital)	2
AP2S1	LoF	Hypocalciuric hypercalcemia, type III (600740) (AD)	DDG2P (AD ) (Congenital); Renal tubulopathies (AD ) (Genitourinary); Familial hyperparathyroidism or hypocalciuric hypercalcaemia (AD ) (Endocrine/Metabolic)	3
AP3B1	LoF	Hermansky-Pudlak syndrome 2 (608233) (AR)	Pigmentary skin disorders (AR ) (Skin); Vici Syndrome and other autophagy disorders (AR ) (Congenital); Severe Paediatric Disorders (AR ) (-); Intellectual disability - microarray and sequencing (AR ) (Nervous); Inherited bleeding disorders (AR ) (Blood/Immune); Familial pulmonary fibrosis (AR ) (Respiratory); COVID-19 research (AR ) (Blood/Immune)	5
AP3B2	LoF	Developmental and epileptic encephalopathy 48 (617276) (AR)	Severe Paediatric Disorders (AR ) (-); Early onset or syndromic epilepsy (AR ) (Nervous); DDG2P (AR ) (Congenital)	2
AP3D1	LoF	?Hermansky-Pudlak syndrome 10 (617050) (AR)	Severe Paediatric Disorders (AR ) (-); Inherited bleeding disorders (AR ) (Blood/Immune); COVID-19 research (AR ) (Blood/Immune)	1
AP4B1	LoF	Spastic paraplegia 47, autosomal recessive (614066) (AR)	Severe Paediatric Disorders (AR ) (-); White matter disorders and cerebral calcification - narrow panel (AR ) (Nervous); DDG2P (AR ) (Congenital)	2
AP4E1	LoF	Spastic paraplegia 51, autosomal recessive (613744) (AR);Stuttering, familial persistent, 1 (184450) (AD)	Severe Paediatric Disorders (AD ) (-); Hereditary spastic paraplegia (AR ) (Nervous); Fetal anomalies (AR ) (Congenital)	2
AP4M1	LoF	Spastic paraplegia 50, autosomal recessive (612936) (AR)	Severe Paediatric Disorders (AR ) (-); Hereditary spastic paraplegia (AR ) (Nervous); DDG2P (AR ) (Congenital)	2
AP4S1	LoF	Spastic paraplegia 52, autosomal recessive (614067) (AR)	Severe Paediatric Disorders (AR ) (-); Hereditary spastic paraplegia (AR ) (Nervous); DDG2P (AR ) (Congenital)	2
AP5Z1	LoF	Spastic paraplegia 48, autosomal recessive (613647) (AR)	Severe Paediatric Disorders (AR ) (-); Childhood onset hereditary spastic paraplegia (AR ) (Nervous)	1
APC	LoF	Adenoma, periampullary, somatic (175100);Adenomatous polyposis coli (175100) (AD);Brain tumor-polyposis syndrome 2 (175100) (AD);Colorectal cancer, somatic (114500);Desmoid disease, hereditary (135290) (AD);Gardner syndrome (175100) (AD);Gastric adenocarcinoma and proximal polyposis of the stomach (619182) (AD);Gastric cancer, somatic (613659);Hepatoblastoma, somatic (114550);Adenoma, periampulla…	Severe Paediatric Disorders (AD ) (-); Inherited non-medullary thyroid cancer (AD ) (Neoplasm); Additional findings health related - children (AD ) (-)	1
APC2	LoF	Cortical dysplasia, complex, with other brain malformations 10 (618677) (AR);Intellectual developmental disorder, autosomal recessive 74 (617169) (AR)	Malformations of cortical development (AR ) (Nervous); DDG2P (AR ) (Congenital)	2
APCDD1	LoF	Hypotrichosis 1 (605389) (AD)	Non-syndromic hypotrichosis (AD ) (Skin)	1
APOA1	LoF	Amyloidosis, hereditary systemic 3 (620657);Hypoalphalipoproteinemia, primary, 2 (618463) (AR);Hypoalphalipoproteinemia, primary, 2, intermediate (619836) (AD)	Severe Paediatric Disorders (AD ) (-); Undiagnosed metabolic disorders (AD ) (Endocrine/Metabolic); Periodic fever syndromes (AD ) (Musculoskeletal/Connective)	2
APOA2	LoF	{Hypercholesterolemia, familial, modifier of} (143890) (AD, AR);Apolipoprotein A-II deficiency;{Hypercholesterolemia, familial, modifier of} (143890) (AD, AR);Apolipoprotein A-II deficiency;{Hypercholesterolemia, familial, modifier of} (143890) (AD, AR);Apolipoprotein A-II deficiency;{Hypercholesterolemia, familial, modifier of} (143890) (AD, AR);Apolipoprotein A-II deficiency	Periodic fever syndromes (AD ) (Musculoskeletal/Connective)	1
APOA5	LoF	{Hypertriglyceridemia, susceptibility to} (145750) (AD);Hyperchylomicronemia, late-onset (144650) (AD)	Severe Paediatric Disorders (AD ) (-); Severe hypertriglyceridaemia (AD ) (Endocrine/Metabolic)	1
APOB	LoF	Hypercholesterolemia, familial, 2 (144010) (AD);Hypobetalipoproteinemia (615558) (AR)	Severe Paediatric Disorders (AD ) (-); Intestinal failure or congenital diarrhoea (AR ) (Digestive); Familial hypercholesterolaemia (AD ) (Endocrine/Metabolic); Additional findings health related - children (AD ) (-)	2
APOC2	LoF	Hyperlipoproteinemia, type Ib (207750) (AR)	Periodic fever syndromes (AD ) (Musculoskeletal/Connective); Severe Paediatric Disorders (AR ) (-); Severe hypertriglyceridaemia (AR ) (Endocrine/Metabolic)	2
APOE	GoF	{?Alzheimer disease, protection against, due to APOE3-Christchurch} (607822) (AD);{?Macular degeneration, age-related} (603075) (AD);{Coronary artery disease, severe, susceptibility to} (617347);Alzheimer disease 2 (104310) (AD);Hyperlipoproteinemia, type III (617347);Lipoprotein glomerulopathy (611771);Sea-blue histiocyte disease (269600) (AR);{?Alzheimer disease, protection against, due to APOE…	Familial hypercholesterolaemia (AD_GOF ) (Endocrine/Metabolic); Severe Paediatric Disorders (AR_GOF ) (-); Proteinuric renal disease (AD_GOF ) (Genitourinary)	2
APOL1	LoF	{Glomerulosclerosis, focal segmental, 4, susceptibility to} (612551) (AD)	COVID-19 research (AD ) (Blood/Immune)	1
APP	LoF	Alzheimer disease 1, familial (104300) (AD);Cerebral amyloid angiopathy, Dutch, Italian, Iowa, Flemish, Arctic variants (605714) (AD);Alzheimer disease 1, familial (104300) (AD);Cerebral amyloid angiopathy, Dutch, Italian, Iowa, Flemish, Arctic variants (605714) (AD);Alzheimer disease 1, familial (104300) (AD);Cerebral amyloid angiopathy, Dutch, Italian, Iowa, Flemish, Arctic variants (605714) (A…	Early onset dementia encompassing fronto-temporal dementia and prion disease (AD ) (Nervous)	1
APPL1	LoF	{Maturity-onset diabetes of the young, type 14} (616511) (AD)	Familial diabetes (AD ) (Endocrine/Metabolic)	1
APRT	LoF	Adenine phosphoribosyltransferase deficiency (614723) (AR)	Severe Paediatric Disorders (AR ) (-); Undiagnosed metabolic disorders (AR ) (Endocrine/Metabolic); Nephrocalcinosis or nephrolithiasis (AR ) (Genitourinary)	2
APTX	LoF	Ataxia, early-onset, with oculomotor apraxia and hypoalbuminemia (208920) (AR)	DDG2P (AR ) (Congenital); Undiagnosed metabolic disorders (AR ) (Endocrine/Metabolic); Severe Paediatric Disorders (AR ) (-); Possible mitochondrial disorder - nuclear genes (AR ) (Endocrine/Metabolic); Early onset dystonia (AR ) (Nervous)	3
AQP2	LoF	Diabetes insipidus, nephrogenic, 2 (125800) (AD, AR)	Renal tubulopathies (AD ) (Genitourinary); Monogenic nephrogenic diabetes insipidus (AD ) (Endocrine/Metabolic)	2
AQP5	LoF	Palmoplantar keratoderma, Bothnian type (600231) (AD)	Palmoplantar keratoderma and erythrokeratodermas (AD ) (Skin)	1
AR	LoF	{Prostate cancer, susceptibility to} (301120) (XL);Androgen insensitivity (300068) (XLR);Androgen insensitivity, partial, with or without breast cancer (312300) (XLR);Hypospadias 1, X-linked (300633) (XLR);Spinal and bulbar muscular atrophy, X-linked 1 (313200) (XLR)	DDG2P (XLR ) (Congenital); Severe Paediatric Disorders (XLR ) (-); Other rare neuromuscular disorders (XLR ) (Musculoskeletal/Connective); Fetal anomalies (XLR ) (Congenital); Disorders of sex development (XLR ) (Endocrine/Metabolic)	3
ARCN1	LoF	Short stature-micrognathia syndrome (617164) (AD)	Fetal anomalies (AD ) (Congenital); Skeletal dysplasia (AD ) (Musculoskeletal/Connective); Severe Paediatric Disorders (AD ) (-); Intellectual disability - microarray and sequencing (AD ) (Nervous)	3
ARF1	LoF	Periventricular nodular heterotopia 8 (618185) (AD)	DDG2P (AD ) (Congenital); Malformations of cortical development (AD ) (Nervous)	2
ARF3	LoF	-	DDG2P (AD ) (Congenital)	1
ARFGEF1	LoF	Developmental delay, impaired speech, and behavioral abnormalities, with or without seizures (619964) (AD)	DDG2P (AD ) (Congenital); Early onset or syndromic epilepsy (AD ) (Nervous)	2
ARFGEF2	LoF	Periventricular heterotopia with microcephaly (608097) (AR);Periventricular heterotopia with microcephaly (608097) (AR)	Severe Paediatric Disorders (AR ) (-); Malformations of cortical development (AR ) (Nervous); Fetal anomalies (AR ) (Congenital)	2
ARFGEF3	LoF	-	Childhood onset dystonia, chorea or related movement disorder (AD ) (Nervous)	1
ARG1	LoF	Argininemia (207800) (AR)	Severe Paediatric Disorders (AR ) (-); Hyperammonaemia (AR ) (Endocrine/Metabolic); Hereditary spastic paraplegia (AR ) (Nervous); DDG2P (AR ) (Congenital)	3
ARHGAP29	LoF	-	Fetal anomalies (AD ) (Congenital); Clefting (AD ) (Musculoskeletal/Connective)	2
ARHGAP31	GoF	Adams-Oliver syndrome 1 (100300) (AD)	Limb disorders (AD_GOF ) (Musculoskeletal/Connective); Severe Paediatric Disorders (AD_GOF ) (-); Fetal anomalies (AD_GOF ) (Congenital)	2
ARHGAP35	LoF	-	DDG2P (AD ) (Congenital)	1
ARHGDIA	LoF	Nephrotic syndrome, type 8 (615244) (AR)	Severe Paediatric Disorders (AR ) (-); Unexplained kidney failure in young people (AR ) (Genitourinary)	1
ARHGEF1	LoF	?Immunodeficiency 62 (618459) (AR)	COVID-19 research (AR ) (Blood/Immune)	1
ARHGEF18	LoF	Retinitis pigmentosa 78 (617433) (AR)	Retinal disorders (AR ) (Eye)	1
ARHGEF9	LoF	Developmental and epileptic encephalopathy 8 (300607) (XL)	Severe Paediatric Disorders (XLD ) (-); Intellectual disability - microarray and sequencing (XLD ) (Nervous); Early onset or syndromic epilepsy (XLD ) (Nervous); DDG2P (XLD ) (Congenital)	2
ARID1A	LoF	Coffin-Siris syndrome 2 (614607) (AD)	Fetal anomalies (AD ) (Congenital); Severe Paediatric Disorders (AD ) (-); Intellectual disability - microarray and sequencing (AD ) (Nervous)	2
ARID1B	LoF	Coffin-Siris syndrome 1 (135900) (AD)	Rare syndromic craniosynostosis or isolated multisuture synostosis (AD ) (Musculoskeletal/Connective); Severe Paediatric Disorders (AD ) (-); Fetal anomalies (AD ) (Congenital); Early onset or syndromic epilepsy (AD ) (Nervous)	3
ARID2	LoF	Coffin-Siris syndrome 6 (617808) (AD)	DDG2P (AD ) (Congenital); Severe Paediatric Disorders (AD ) (-); Intellectual disability - microarray and sequencing (AD ) (Nervous)	2
ARIH1	LoF	-	Thoracic aortic aneurysm or dissection (AD ) (Circulatory)	1
ARL13B	LoF	Joubert syndrome 8 (612291) (AR)	Severe Paediatric Disorders (AR ) (-); Unexplained young onset end-stage renal disease (AR ) (Genitourinary); Retinal disorders (AR ) (Eye); Rare multisystem ciliopathy disorders (AR ) (Congenital); Intellectual disability - microarray and sequencing (AR ) (Nervous); Fetal anomalies (AR ) (Congenital)	4
ARL2BP	LoF	Retinitis pigmentosa 82 with or without situs inversus (615434) (AR)	Retinal disorders (AR ) (Eye)	1
ARL3	LoF	Joubert syndrome 35 (618161) (AR);Retinitis pigmentosa 83 (618173) (AD)	DDG2P (AR ) (Congenital); Retinal disorders (AD ) (Eye)	2
ARL6	LoF	{Bardet-Biedl syndrome 1, modifier of} (209900) (AR, DR);Bardet-Biedl syndrome 3 (600151) (AR);Retinitis pigmentosa 55 (613575) (AR);{Bardet-Biedl syndrome 1, modifier of} (209900) (AR, DR);Bardet-Biedl syndrome 3 (600151) (AR);Retinitis pigmentosa 55 (613575) (AR);{Bardet-Biedl syndrome 1, modifier of} (209900) (AR, DR);Bardet-Biedl syndrome 3 (600151) (AR);Retinitis pigmentosa 55 (613575) (AR)	Limb disorders (AR ) (Musculoskeletal/Connective); Unexplained young onset end-stage renal disease (AR ) (Genitourinary); Severe Paediatric Disorders (AR ) (-); Severe early-onset obesity (AR ) (Endocrine/Metabolic); Retinal disorders (AR ) (Eye); Rare multisystem ciliopathy disorders (AR ) (Congenital); Intellectual disability - microarray and sequencing (AR ) (Nervous); Fetal anomalies (AR ) (C…	6
ARL6IP1	LoF	Spastic paraplegia 61, autosomal recessive (615685) (AR)	Childhood onset hereditary spastic paraplegia (AR ) (Nervous)	1
ARMC5	LoF	ACTH-independent macronodular adrenal hyperplasia 2 (615954) (AD, SMu)	Primary pigmented nodular adrenocortical disease (AD ) (Endocrine/Metabolic)	1
ARMC9	LoF	Joubert syndrome 30 (617622) (AR)	Fetal anomalies (AR ) (Congenital); Unexplained young onset end-stage renal disease (AR ) (Genitourinary); Severe Paediatric Disorders (AR ) (-); Rare multisystem ciliopathy disorders (AR ) (Congenital); Ophthalmological ciliopathies (AR ) (Eye); Intellectual disability - microarray and sequencing (AR ) (Nervous)	4
ARPC1B	LoF	Immunodeficiency 71 with inflammatory disease and congenital thrombocytopenia (617718) (AR)	Severe Paediatric Disorders (AR ) (-); Inherited bleeding disorders (AR ) (Blood/Immune); COVID-19 research (AR ) (Blood/Immune)	1
ARPC4	LoF	Developmental delay, language impairment, and ocular abnormalities (620141) (AD)	DDG2P (AD ) (Congenital); Severe microcephaly (AD ) (Nervous)	2
ARSA	LoF	Metachromatic leukodystrophy (250100) (AR)	Severe Paediatric Disorders (AR ) (-); White matter disorders and cerebral calcification - narrow panel (AR ) (Nervous); Lysosomal storage disorder (AR ) (Endocrine/Metabolic); Fetal anomalies (AR ) (Congenital)	3
ARSB	LoF	Mucopolysaccharidosis type VI (Maroteaux-Lamy) (253200) (AR)	Skeletal dysplasia (AR ) (Musculoskeletal/Connective); Severe Paediatric Disorders (AR ) (-); Mucopolysaccharideosis, Gaucher, Fabry (AR ) (Endocrine/Metabolic); Hydrocephalus (AR ) (Nervous); Fetal anomalies (AR ) (Congenital)	4
ARSG	LoF	Usher syndrome, type IV (618144) (AR)	Lysosomal storage disorder (AR ) (Endocrine/Metabolic); Retinal disorders (AR ) (Eye)	2
ARSL	LoF	Chondrodysplasia punctata, X-linked recessive (302950) (XLR)	DDG2P (XLR ) (Congenital); Undiagnosed metabolic disorders (XLR ) (Endocrine/Metabolic); Skeletal dysplasia (XLR ) (Musculoskeletal/Connective); Severe Paediatric Disorders (XLR ) (-); Pigmentary skin disorders (XLR ) (Skin); Palmoplantar keratodermas (XLR ) (Skin); Limb disorders (XLR ) (Musculoskeletal/Connective); Likely inborn error of metabolism - targeted testing not possible (XLR ) (Endocr…	5
ARV1	LoF	Developmental and epileptic encephalopathy 38 (617020) (AR)	Severe Paediatric Disorders (AR ) (-); Early onset or syndromic epilepsy (AR ) (Nervous)	1
ARX	LoF	Developmental and epileptic encephalopathy 1 (308350) (XLR);Hydranencephaly with abnormal genitalia (300215) (XL);Intellectual developmental disorder, X-linked 29 (300419) (XLR);Lissencephaly, X-linked 2 (300215) (XL);Partington syndrome (309510) (XLR);Proud syndrome (300004) (XL)	Severe Paediatric Disorders (XLD ) (-); Malformations of cortical development (XLD ) (Nervous); Intestinal failure or congenital diarrhoea (XLD ) (Digestive); Intellectual disability - microarray and sequencing (XLD ) (Nervous); Fetal anomalies (XLD ) (Congenital); Early onset or syndromic epilepsy (XLD ) (Nervous); Early onset dystonia (XLR ) (Nervous); Disorders of sex development (XLD ) (Endoc…	4
ASAH1	LoF	Farber lipogranulomatosis (228000) (AR);Spinal muscular atrophy with progressive myoclonic epilepsy (159950) (AR)	Severe Paediatric Disorders (AR ) (-); Other rare neuromuscular disorders (AR ) (Musculoskeletal/Connective); Lysosomal storage disorder (AR ) (Endocrine/Metabolic); Fetal hydrops (AR ) (Congenital); Familial pulmonary fibrosis (AR ) (Respiratory); Early onset or syndromic epilepsy (AR ) (Nervous)	5
ASCC1	LoF	Barrett esophagus/esophageal adenocarcinoma (614266);Spinal muscular atrophy with congenital bone fractures 2 (616867) (AR);Barrett esophagus/esophageal adenocarcinoma (614266);Spinal muscular atrophy with congenital bone fractures 2 (616867) (AR)	Severe Paediatric Disorders (AR ) (-); Paediatric disorders - additional genes (AR ) (-); Fetal anomalies (AR ) (Congenital); Arthrogryposis (AR ) (Musculoskeletal/Connective)	2
ASCC3	LoF	Intellectual developmental disorder, autosomal recessive 81 (620700) (AR)	Congenital myopathy (AR ) (Musculoskeletal/Connective)	1
ASH1L	LoF	Intellectual developmental disorder, autosomal dominant 52 (617796) (AD)	DDG2P (AD ) (Congenital); Severe Paediatric Disorders (AD ) (-); Early onset or syndromic epilepsy (AD ) (Nervous)	2
ASL	LoF	Argininosuccinic aciduria (207900) (AR)	Severe Paediatric Disorders (AR ) (-); Intellectual disability - microarray and sequencing (AR ) (Nervous); Hyperammonaemia (AR ) (Endocrine/Metabolic); DDG2P (AR ) (Congenital)	3
ASNS	LoF	Asparagine synthetase deficiency (615574) (AR)	Severe Paediatric Disorders (AR ) (-); Fetal anomalies (AR ) (Congenital); Early onset or syndromic epilepsy (AR ) (Nervous)	2
ASPA	LoF	Canavan disease (271900) (AR)	Severe Paediatric Disorders (AR ) (-); White matter disorders and cerebral calcification - narrow panel (AR ) (Nervous); Undiagnosed metabolic disorders (AR ) (Endocrine/Metabolic); Fetal anomalies (AR ) (Congenital)	3
ASPH	LoF	Traboulsi syndrome (601552) (AR)	Structural eye disease (AR ) (Eye); Thoracic aortic aneurysm or dissection GMS (AR ) (Circulatory); DDG2P (AR ) (Congenital)	3
ASPM	LoF	Microcephaly 5, primary, autosomal recessive (608716) (AR)	Severe Paediatric Disorders (AR ) (-); Malformations of cortical development (AR ) (Nervous); Fetal anomalies (AR ) (Congenital)	2
ASPRV1	LoF	Ichthyosis, lamellar, autosomal dominant (146750) (AD)	Ichthyosis and erythrokeratoderma (AD ) (Skin)	1
ASS1	LoF	Citrullinemia (215700) (AR)	Severe Paediatric Disorders (AR ) (-); Intellectual disability - microarray and sequencing (AR ) (Nervous); Hyperammonaemia (AR ) (Endocrine/Metabolic); Fetal anomalies (AR ) (Congenital)	3
ASXL1	LoF	Bohring-Opitz syndrome (605039) (AD);Myelodysplastic syndrome, somatic (614286);Bohring-Opitz syndrome (605039) (AD);Myelodysplastic syndrome, somatic (614286);Bohring-Opitz syndrome (605039) (AD);Myelodysplastic syndrome, somatic (614286);Bohring-Opitz syndrome (605039) (AD);Myelodysplastic syndrome, somatic (614286);Bohring-Opitz syndrome (605039) (AD);Myelodysplastic syndrome, somatic (614286)	Fetal anomalies (AD ) (Congenital); Severe Paediatric Disorders (AD ) (-); Limb disorders (AD ) (Musculoskeletal/Connective); Intellectual disability - microarray and sequencing (AD ) (Nervous); Arthrogryposis (AD ) (Musculoskeletal/Connective)	3
ASXL2	LoF	Shashi-Pena syndrome (617190) (AD)	Beckwith-Wiedemann syndrome BWS and other congenital overgrowth disorders (AD ) (Congenital); Skeletal dysplasia (AD ) (Musculoskeletal/Connective); Severe Paediatric Disorders (AD ) (-); Intellectual disability - microarray and sequencing (AD ) (Nervous)	3
ASXL3	LoF	Bainbridge-Ropers syndrome (615485) (AD)	DDG2P (AD ) (Congenital); Severe Paediatric Disorders (AD ) (-); Early onset or syndromic epilepsy (AD ) (Nervous)	2
ATAD1	LoF+GoF	Hyperekplexia 4 (618011) (AR)	Severe Paediatric Disorders (AR ) (-); Paroxysmal central nervous system disorders (AR ) (Nervous)	1
ATAD3A	GoF	Harel-Yoon syndrome (617183) (AD, AR);Pontocerebellar hypoplasia, hypotonia, and respiratory insufficiency syndrome, neonatal lethal (618810) (AR)	Severe Paediatric Disorders (AD_GOF ) (-); Undiagnosed metabolic disorders (AD_GOF ) (Endocrine/Metabolic); Possible mitochondrial disorder - nuclear genes (AD_GOF ) (Endocrine/Metabolic); Intellectual disability - microarray and sequencing (AD_GOF ) (Nervous); Fetal anomalies (AD_GOF ) (Congenital); Bilateral congenital or childhood onset cataracts (AR_GOF ) (Eye)	4
ATCAY	LoF	Ataxia, cerebellar, Cayman type (601238) (AR)	Severe Paediatric Disorders (AR ) (-); Ataxia and cerebellar anomalies - narrow panel (AR ) (Nervous)	1
ATF6	LoF	Achromatopsia 7 (616517) (AR)	Retinal disorders (AR ) (Eye)	1
ATG7	LoF	Spinocerebellar ataxia, autosomal recessive 31 (619422) (AR)	Ataxia and cerebellar anomalies - narrow panel (AR ) (Nervous); Optic neuropathy (AR ) (Eye); DDG2P (AR ) (Congenital)	3
ATIC	LoF	AICA-ribosiduria due to ATIC deficiency (608688) (AR)	Severe Paediatric Disorders (AR ) (-); Undiagnosed metabolic disorders (AR ) (Endocrine/Metabolic); Intellectual disability - microarray and sequencing (AR ) (Nervous); Fetal anomalies (AR ) (Congenital)	3
ATL1	LoF	Neuropathy, hereditary sensory, type ID (613708) (AD);Spastic paraplegia 3A, autosomal dominant (182600) (AD)	DDG2P (AD ) (Congenital); Severe Paediatric Disorders (AD ) (-); Pain syndromes (AD ) (Nervous)	2
ATL3	LoF	Neuropathy, hereditary sensory, type IF (615632) (AD)	Pain syndromes (AD ) (Nervous)	1
ATM	LoF	{Breast cancer, susceptibility to} (114480) (AD, SMu);Ataxia-telangiectasia (208900) (AR);Lymphoma, B-cell non-Hodgkin, somatic;Lymphoma, mantle cell, somatic;T-cell prolymphocytic leukemia, somatic;{Breast cancer, susceptibility to} (114480) (AD, SMu);Ataxia-telangiectasia (208900) (AR);Lymphoma, B-cell non-Hodgkin, somatic;Lymphoma, mantle cell, somatic;T-cell prolymphocytic leukemia, somatic;{…	Familial breast cancer (AD ) (Neoplasm); Vascular skin disorders (AR ) (Skin); Severe Paediatric Disorders (AR ) (-); Early onset dystonia (AR ) (Nervous); DDG2P (AR ) (Congenital); COVID-19 research (AR ) (Blood/Immune)	5
ATN1	LoF	Congenital hypotonia, epilepsy, developmental delay, and digital anomalies (618494) (AD);Dentatorubral-pallidoluysian atrophy (125370) (AD)	DDG2P (AD ) (Congenital); Severe Paediatric Disorders (AD ) (-); Early onset or syndromic epilepsy (AD ) (Nervous)	2
ATOH7	LoF	Persistent hyperplastic primary vitreous, autosomal recessive (221900) (AR)	Glaucoma developmental (AR ) (Eye)	1
ATP13A2	LoF	Kufor-Rakeb syndrome (606693) (AR);Spastic paraplegia 78, autosomal recessive (617225) (AR)	Severe Paediatric Disorders (AR ) (-); Parkinson Disease and Complex Parkinsonism (AR ) (Nervous); Lysosomal storage disorder (AR ) (Endocrine/Metabolic); DDG2P (AR ) (Congenital)	3
ATP13A3	LoF	Pulmonary hypertension, primary, 5 (265400) (AR)	Pulmonary arterial hypertension (AR ) (Circulatory)	1
ATP1A1	LoF	Charcot-Marie-Tooth disease, axonal, type 2DD (618036) (AD);Hypomagnesemia, seizures, and impaired intellectual development 2 (618314) (AD)	DDG2P (AD ) (Congenital); Severe Paediatric Disorders (AD ) (-); Renal tubulopathies (AD ) (Genitourinary); Hereditary neuropathy (AD ) (Nervous)	3
ATP1A2	LoF+GoF	Alternating hemiplegia of childhood 1 (104290) (AD);Developmental and epileptic encephalopathy 98 (619605) (AD);Fetal akinesia, respiratory insufficiency, microcephaly, polymicrogyria, and dysmorphic facies (619602) (AR);Migraine, familial basilar (602481) (AD);Migraine, familial hemiplegic, 2 (602481) (AD)	DDG2P (AD ) (Congenital); Skeletal Muscle Channelopathies (AD ) (Musculoskeletal/Connective); Severe Paediatric Disorders (AD ) (-); Brain channelopathy (AD ) (Nervous)	3
ATP1A3	GoF	Alternating hemiplegia of childhood 2 (614820) (AD);CAPOS syndrome (601338) (AD);Developmental and epileptic encephalopathy 99 (619606) (AD);Dystonia-12 (128235) (AD)	DDG2P (AD_GOF ) (Congenital); Severe Paediatric Disorders (AD_GOF ) (-); Parkinson Disease and Complex Parkinsonism (AD_GOF ) (Nervous); Auditory Neuropathy Spectrum Disorde (AD_GOF ) (Ear)	3
ATP2A1	LoF	Brody myopathy (601003) (AR)	Severe Paediatric Disorders (AR ) (-); Skeletal Muscle Channelopathies (AR ) (Musculoskeletal/Connective)	1
ATP2B1	LoF	Intellectual developmental disorder, autosomal dominant 66 (619910) (AD)	DDG2P (AD ) (Congenital); Intellectual disability - microarray and sequencing (AD ) (Nervous)	2
ATP2C1	LoF	Hailey-Hailey disease (169600) (AD)	Epidermolysis bullosa and congenital skin fragility (AD ) (Skin)	1
ATP5F1AP1	LoF	?Mitochondrial complex V (ATP synthase) deficiency, nuclear type 4B, encephalopathic type (615228) (AR)	Mitochondrial disorder with complex V deficiency (AD ) (Endocrine/Metabolic); Undiagnosed metabolic disorders (AD ) (Endocrine/Metabolic); DDG2P (AD ) (Congenital)	2
ATP5F1D	LoF	Mitochondrial complex V (ATP synthase) deficiency (618120) (AR)	DDG2P (AR ) (Congenital); Severe Paediatric Disorders (AR ) (-); Mitochondrial disorder with complex V deficiency (AR ) (Endocrine/Metabolic); Likely inborn error of metabolism - targeted testing not possible (AR ) (Endocrine/Metabolic)	2
ATP5F1E	LoF	Mitochondrial complex V (ATP synthase) deficiency, nuclear type 3 (614053) (AR);Mitochondrial complex V (ATP synthase) deficiency, nuclear type 3 (614053) (AR)	Undiagnosed metabolic disorders (AR ) (Endocrine/Metabolic)	1
ATP5MC3	LoF	Dystonia, early-onset, and/or spastic paraplegia (619681) (AD)	Childhood onset dystonia, chorea or related movement disorder (AD ) (Nervous); Mitochondrial disorder with complex V deficiency (AD ) (Endocrine/Metabolic); Likely inborn error of metabolism - targeted testing not possible (AD ) (Endocrine/Metabolic)	2
ATP5PO	LoF	Mitochondrial complex V (ATP synthase) deficiency, nuclear type 7 (620359) (AR)	Early onset or syndromic epilepsy (AR ) (Nervous); Mitochondrial disorders (AR ) (Endocrine/Metabolic); Likely inborn error of metabolism - targeted testing not possible (AR ) (Endocrine/Metabolic); Fetal anomalies (AR ) (Congenital)	3
ATP6AP1	LoF	Immunodeficiency 47 (300972) (XLR)	Severe Paediatric Disorders (XLR ) (-); Undiagnosed metabolic disorders (XLR ) (Endocrine/Metabolic); Primary immunodeficiency or monogenic inflammatory bowel disease (XLR ) (Blood/Immune); Likely inborn error of metabolism - targeted testing not possible (XLR ) (Endocrine/Metabolic); COVID-19 research (XLR ) (Blood/Immune); Congenital disorders of glycosylation (XLR ) (Endocrine/Metabolic)	2
ATP6AP2	LoF	?Parkinsonism with spasticity, X-linked (300911) (XLR);Congenital disorder of glycosylation, type IIr (301045) (XLR);Intellectual developmental disorder, X-linked syndromic, Hedera type (300423) (XLR)	Severe Paediatric Disorders (XLR ) (-); Intellectual disability - microarray and sequencing (XLR ) (Nervous)	1
ATP6V0A1	LoF	Developmental and epileptic encephalopathy 104 (619970) (AD);Neurodevelopmental disorder with epilepsy and brain atrophy (619971) (AR)	DDG2P (AD ) (Congenital); Ataxia and cerebellar anomalies - narrow panel (AD ) (Nervous)	2
ATP6V0A2	LoF	Cutis laxa, autosomal recessive, type IIA (219200) (AR);Wrinkly skin syndrome (278250) (AR)	Skeletal dysplasia (AR ) (Musculoskeletal/Connective); Severe Paediatric Disorders (AR ) (-); Fetal anomalies (AR ) (Congenital); Early onset or syndromic epilepsy (AR ) (Nervous); Congenital disorders of glycosylation (AR ) (Endocrine/Metabolic)	4
ATP6V0A4	LoF	Distal renal tubular acidosis 3, with or without sensorineural hearing loss (602722) (AR)	Nephrocalcinosis or nephrolithiasis (AR ) (Genitourinary)	1
ATP6V0C	LoF	Epilepsy, early-onset, 3, with or without developmental delay (620465) (AD)	DDG2P (AD ) (Congenital)	1
ATP6V1A	LoF+GoF	Cutis laxa, autosomal recessive, type IID (617403) (AR);Developmental and epileptic encephalopathy 93 (618012) (AD)	DDG2P (AD ) (Congenital); Severe Paediatric Disorders (AD ) (-); Intellectual disability - microarray and sequencing (AD ) (Nervous); Ehlers Danlos syndrome with a likely monogenic cause (AR ) (Musculoskeletal/Connective)	3
ATP6V1B1	LoF	Distal renal tubular acidosis 2 with progressive sensorineural hearing loss (267300) (AR)	Severe Paediatric Disorders (AR ) (-); Nephrocalcinosis or nephrolithiasis (AR ) (Genitourinary); Monogenic hearing loss (AR ) (Ear); DDG2P (AR ) (Congenital)	3
ATP6V1B2	LoF	Deafness, congenital, with onychodystrophy, autosomal dominant (124480) (AD);Zimmermann-Laband syndrome 2 (616455) (AD)	DDG2P (AD ) (Congenital); Severe Paediatric Disorders (AD ) (-); Monogenic hearing loss (AD ) (Ear); Intellectual disability - microarray and sequencing (AD ) (Nervous)	3
ATP6V1E1	LoF	Cutis laxa, autosomal recessive, type IIC (617402) (AR)	DDG2P (AR ) (Congenital)	1
ATP7A	LoF	Menkes disease (309400) (XLR);Neuronopathy, distal hereditary motor, X-linked (300489) (XLR);Occipital horn syndrome (304150) (XLR)	DDG2P (XLR ) (Congenital); Undiagnosed metabolic disorders (XLR ) (Endocrine/Metabolic); Skeletal dysplasia (XLR ) (Musculoskeletal/Connective); Severe Paediatric Disorders (XLR ) (-); Likely inborn error of metabolism - targeted testing not possible (XLR ) (Endocrine/Metabolic); Intellectual disability - microarray and sequencing (XLR ) (Nervous); Hereditary neuropathy or pain disorder (XLR ) (N…	4
ATP7B	LoF	Wilson disease (277900) (AR)	Severe Paediatric Disorders (AR ) (-); Neonatal cholestasis (AR ) (Digestive); Iron metabolism disorders - NOT common HFE mutations (AR ) (Endocrine/Metabolic); Brain channelopathy (AR ) (Nervous)	3
ATP8A2	LoF	Cerebellar ataxia, impaired intellectual development, and dysequilibrium syndrome 4 (615268) (AR)	Ataxia and cerebellar anomalies - narrow panel (AR ) (Nervous)	1
ATP8B1	LoF	Cholestasis, benign recurrent intrahepatic (243300) (AR);Cholestasis, intrahepatic, of pregnancy, 1 (147480) (AD);Cholestasis, progressive familial intrahepatic 1 (211600) (AR)	Undiagnosed metabolic disorders (AD ) (Endocrine/Metabolic); Severe Paediatric Disorders (AR ) (-); Neonatal cholestasis (AD ) (Digestive); DDG2P (AR ) (Congenital)	3
ATP9A	LoF	Neurodevelopmental disorder with poor growth and behavioral abnormalities (620242) (AR);Neurodevelopmental disorder with poor growth and behavioral abnormalities (620242) (AR)	Intellectual disability - microarray and sequencing (AR ) (Nervous); DDG2P (AR ) (Congenital)	2
ATPAF2	LoF	?Mitochondrial complex V (ATP synthase) deficiency, nuclear type 1 (604273) (AR)	Mitochondrial disorder with complex V deficiency (AR ) (Endocrine/Metabolic); Undiagnosed metabolic disorders (AR ) (Endocrine/Metabolic)	1
ATR	LoF	?Cutaneous telangiectasia and cancer syndrome, familial (614564) (AD);Seckel syndrome 1 (210600) (AR)	Severe Paediatric Disorders (AR ) (-); Severe microcephaly (AR ) (Nervous); Fetal anomalies (AR ) (Congenital)	2
ATRX	LoF	Alpha-thalassemia myelodysplasia syndrome, somatic (300448);Alpha-thalassemia/impaired intellectual development syndrome (301040) (XLD);Intellectual disability-hypotonic facies syndrome, X-linked (309580) (XLR)	DDG2P (XLD ) (Congenital); Severe Paediatric Disorders (XLD ) (-); Severe microcephaly (XLD ) (Nervous); Intellectual disability - microarray and sequencing (XLD ) (Nervous); Gastrointestinal neuromuscular disorders (XLD ) (Digestive); Fetal anomalies (XLD ) (Congenital); Early onset or syndromic epilepsy (XLD ) (Nervous); Disorders of sex development (XLD ) (Endocrine/Metabolic)	4
AUH	LoF	3-methylglutaconic aciduria, type I (250950) (AR)	Severe Paediatric Disorders (AR ) (-); White matter disorders and cerebral calcification - narrow panel (AR ) (Nervous); Hyperammonaemia (AR ) (Endocrine/Metabolic); DDG2P (AR ) (Congenital)	3
AUTS2	LoF	Intellectual developmental disorder, autosomal dominant 26 (615834) (AD)	DDG2P (AD ) (Congenital); Severe Paediatric Disorders (AD ) (-); Intellectual disability - microarray and sequencing (AD ) (Nervous)	2
AVP	LoF	Diabetes insipidus, neurohypophyseal (125700) (AD);Diabetes insipidus, neurohypophyseal (125700) (AD)	Hereditary isolated diabetes insipidus (AD ) (Endocrine/Metabolic)	1
AVPR2	LoF	Diabetes insipidus, nephrogenic, 1 (304800) (XLR);Nephrogenic syndrome of inappropriate antidiuresis (300539) (XLR)	Severe Paediatric Disorders (XLR ) (-); Renal tubulopathies (XLR ) (Genitourinary); Monogenic nephrogenic diabetes insipidus (XLR ) (Endocrine/Metabolic); Hereditary isolated diabetes insipidus (XLR ) (Endocrine/Metabolic)	2
AXIN2	LoF	Colorectal cancer, somatic (114500);Oligodontia-colorectal cancer syndrome (608615) (AD);Colorectal cancer, somatic (114500);Oligodontia-colorectal cancer syndrome (608615) (AD);Colorectal cancer, somatic (114500);Oligodontia-colorectal cancer syndrome (608615) (AD);Colorectal cancer, somatic (114500);Oligodontia-colorectal cancer syndrome (608615) (AD);Colorectal cancer, somatic (114500);Oligodo…	Ectodermal dysplasia (AD ) (Skin)	1
B2M	LoF	Amyloidosis, hereditary systemic 6 (620659);Immunodeficiency 43 (241600) (AR)	Severe Paediatric Disorders (AD ) (-); COVID-19 research (AR ) (Blood/Immune)	1
B3GALNT2	LoF	Muscular dystrophy-dystroglycanopathy (congenital with brain and eye anomalies), type A, 11 (615181) (AR)	Severe Paediatric Disorders (AR ) (-); Structural eye disease (AR ) (Eye); Other rare neuromuscular disorders (AR ) (Musculoskeletal/Connective); Hydrocephalus (AR ) (Nervous); Fetal anomalies (AR ) (Congenital); Congenital disorders of glycosylation (AR ) (Endocrine/Metabolic)	5
B3GALT6	LoF	Al-Gazali syndrome (609465) (AR);Ehlers-Danlos syndrome, spondylodysplastic type, 2 (615349) (AR);Spondyloepimetaphyseal dysplasia with joint laxity, type 1, with or without fractures (271640) (AR)	Skeletal dysplasia (AR ) (Musculoskeletal/Connective); Severe Paediatric Disorders (AR ) (-); Fetal anomalies (AR ) (Congenital); Congenital disorders of glycosylation (AR ) (Endocrine/Metabolic)	3
B3GAT3	LoF	Multiple joint dislocations, short stature, craniofacial dysmorphism, with or without congenital heart defects (245600) (AR)	Skeletal dysplasia (AR ) (Musculoskeletal/Connective); Severe Paediatric Disorders (AR ) (-); Fetal anomalies (AR ) (Congenital); Congenital disorders of glycosylation (AR ) (Endocrine/Metabolic)	3
B3GLCT	LoF	Peters-plus syndrome (261540) (AR)	Skeletal dysplasia (AR ) (Musculoskeletal/Connective); Severe Paediatric Disorders (AR ) (-); Hydrocephalus (AR ) (Nervous); Glaucoma developmental (Unknown ) (Eye); Fetal anomalies (AR ) (Congenital); Congenital disorders of glycosylation (AR ) (Endocrine/Metabolic)	5
B4GALNT1	LoF	Spastic paraplegia 26, autosomal recessive (609195) (AR)	Severe Paediatric Disorders (AR ) (-); Hereditary spastic paraplegia (AR ) (Nervous); Congenital disorders of glycosylation (AR ) (Endocrine/Metabolic)	2
B4GALT1	LoF	Combined low LDL and fibrinogen (620364) (AR);Congenital disorder of glycosylation, type IId (607091) (AR)	Severe Paediatric Disorders (AR ) (-); DDG2P (AR ) (Congenital); Congenital disorders of glycosylation (AR ) (Endocrine/Metabolic)	2
B4GALT7	LoF	Ehlers-Danlos syndrome, spondylodysplastic type, 1 (130070) (AR)	Fetal anomalies (AR ) (Congenital); Skeletal dysplasia (AR ) (Musculoskeletal/Connective); Severe Paediatric Disorders (AR ) (-); Intellectual disability - microarray and sequencing (AR ) (Nervous); Congenital disorders of glycosylation (AR ) (Endocrine/Metabolic)	4
B4GAT1	LoF	Muscular dystrophy-dystroglycanopathy (congenital with brain and eye anomalies), type A, 13 (615287) (AR)	Severe Paediatric Disorders (AR ) (-); Other rare neuromuscular disorders (AR ) (Musculoskeletal/Connective); Hydrocephalus (AR ) (Nervous); Fetal anomalies (AR ) (Congenital)	3
B9D1	LoF	?Meckel syndrome 9 (614209) (AR);Joubert syndrome 27 (617120) (AR)	DDG2P (AR ) (Congenital)	1
B9D2	LoF	?Meckel syndrome 10 (614175) (AR);Joubert syndrome 34 (614175) (AR)	Severe Paediatric Disorders (AR ) (-); Unexplained young onset end-stage renal disease (AR ) (Genitourinary); Rare multisystem ciliopathy disorders (AR ) (Congenital); Ophthalmological ciliopathies (AR ) (Eye); Intellectual disability - microarray and sequencing (AR ) (Nervous); Fetal anomalies (AR ) (Congenital)	4
BAAT	LoF	Bile acid conjugation defect 1 (619232) (AR)	Severe Paediatric Disorders (AR ) (-); Undiagnosed metabolic disorders (AR ) (Endocrine/Metabolic); Neonatal cholestasis (AR ) (Digestive)	2
BACH2	LoF	Immunodeficiency 60 and autoimmunity (618394) (AD)	Severe Paediatric Disorders (AD ) (-); Infantile enterocolitis & monogenic inflammatory bowel disease (AD ) (Digestive); COVID-19 research (AD ) (Blood/Immune)	2
BAG3	LoF	Cardiomyopathy, dilated, 1HH (613881) (AD);Myopathy, myofibrillar, 6 (612954) (AD)	Severe Paediatric Disorders (AD ) (-); Hereditary neuropathy (AD ) (Nervous); Distal myopathies (AD ) (Musculoskeletal/Connective); Dilated Cardiomyopathy and conduction defects (AD ) (Circulatory)	3
BANF1	LoF	Nestor-Guillermo progeria syndrome (614008) (AR)	DDG2P (AR ) (Congenital)	1
BAP1	LoF	{Uveal melanoma, susceptibility to, 2} (606661) (AD);Kury-Isidor syndrome (619762) (AD);Tumor predisposition syndrome 1 (614327) (AD)	DDG2P (AD ) (Congenital); Pigmentary skin disorders (AD ) (Skin); Melanoma pertinent cancer susceptibility (AD ) (Neoplasm); Early onset or syndromic epilepsy (AD ) (Nervous)	4
BBS1	LoF	Bardet-Biedl syndrome 1 (209900) (AR, DR);Bardet-Biedl syndrome 1 (209900) (AR, DR);Bardet-Biedl syndrome 1 (209900) (AR, DR)	Limb disorders (AR ) (Musculoskeletal/Connective); Unexplained young onset end-stage renal disease (AR ) (Genitourinary); Severe Paediatric Disorders (AR ) (-); Severe early-onset obesity (AR ) (Endocrine/Metabolic); Retinal disorders (AR ) (Eye); Rare multisystem ciliopathy disorders (AR ) (Congenital); Fetal anomalies (AR ) (Congenital); Ataxia and cerebellar anomalies - narrow panel (AR ) (Ner…	6
BBS10	LoF	Bardet-Biedl syndrome 10 (615987) (AR)	Limb disorders (AR ) (Musculoskeletal/Connective); Unexplained young onset end-stage renal disease (AR ) (Genitourinary); Severe Paediatric Disorders (AR ) (-); Severe early-onset obesity (AR ) (Endocrine/Metabolic); Retinal disorders (AR ) (Eye); Rare multisystem ciliopathy disorders (AR ) (Congenital); Intellectual disability - microarray and sequencing (AR ) (Nervous); Fetal anomalies (AR ) (C…	6
BBS12	LoF	Bardet-Biedl syndrome 12 (615989) (AR)	Limb disorders (AR ) (Musculoskeletal/Connective); Unexplained young onset end-stage renal disease (AR ) (Genitourinary); Severe Paediatric Disorders (AR ) (-); Severe early-onset obesity (AR ) (Endocrine/Metabolic); Retinal disorders (AR ) (Eye); Rare multisystem ciliopathy disorders (AR ) (Congenital); Intellectual disability - microarray and sequencing (AR ) (Nervous); Fetal anomalies (AR ) (C…	6
BBS2	LoF	Bardet-Biedl syndrome 2 (615981) (AR);Retinitis pigmentosa 74 (616562) (AR)	Limb disorders (AR ) (Musculoskeletal/Connective); Unexplained young onset end-stage renal disease (AR ) (Genitourinary); Severe Paediatric Disorders (AR ) (-); Severe early-onset obesity (AR ) (Endocrine/Metabolic); Retinal disorders (AR ) (Eye); Rare multisystem ciliopathy disorders (AR ) (Congenital); Intellectual disability - microarray and sequencing (AR ) (Nervous); Fetal anomalies (AR ) (C…	6
BBS4	LoF	Bardet-Biedl syndrome 4 (615982) (AR)	Limb disorders (AR ) (Musculoskeletal/Connective); Unexplained young onset end-stage renal disease (AR ) (Genitourinary); Severe Paediatric Disorders (AR ) (-); Severe early-onset obesity (AR ) (Endocrine/Metabolic); Retinal disorders (AR ) (Eye); Rare multisystem ciliopathy disorders (AR ) (Congenital); Intellectual disability - microarray and sequencing (AR ) (Nervous); Fetal anomalies (AR ) (C…	6
BBS5	LoF	Bardet-Biedl syndrome 5 (615983) (AR)	Limb disorders (AR ) (Musculoskeletal/Connective); Unexplained young onset end-stage renal disease (AR ) (Genitourinary); Severe Paediatric Disorders (AR ) (-); Severe early-onset obesity (AR ) (Endocrine/Metabolic); Retinal disorders (AR ) (Eye); Rare multisystem ciliopathy disorders (AR ) (Congenital); Intellectual disability - microarray and sequencing (AR ) (Nervous); Fetal anomalies (AR ) (C…	6
BBS7	LoF	Bardet-Biedl syndrome 7 (615984) (AR)	Limb disorders (AR ) (Musculoskeletal/Connective); Unexplained young onset end-stage renal disease (AR ) (Genitourinary); Severe Paediatric Disorders (AR ) (-); Severe early-onset obesity (AR ) (Endocrine/Metabolic); Retinal disorders (AR ) (Eye); Rare multisystem ciliopathy disorders (AR ) (Congenital); Intellectual disability - microarray and sequencing (AR ) (Nervous); Fetal anomalies (AR ) (C…	6
BBS9	LoF	Bardet-Biedl syndrome 9 (615986) (AR)	Limb disorders (AR ) (Musculoskeletal/Connective); Unexplained young onset end-stage renal disease (AR ) (Genitourinary); Severe Paediatric Disorders (AR ) (-); Severe early-onset obesity (AR ) (Endocrine/Metabolic); Retinal disorders (AR ) (Eye); Rare multisystem ciliopathy disorders (AR ) (Congenital); Intellectual disability - microarray and sequencing (AR ) (Nervous); Fetal anomalies (AR ) (C…	6
BCAP31	LoF	Deafness, dystonia, and cerebral hypomyelination (300475) (XLR)	DDG2P (XLR ) (Congenital); White matter disorders and cerebral calcification - narrow panel (XLR ) (Nervous); Severe Paediatric Disorders (XLR ) (-); Intellectual disability - microarray and sequencing (XLR ) (Nervous); Inherited white matter disorders (XLR ) (Nervous); Fetal anomalies (XLR ) (Congenital); Early onset dystonia (XLR ) (Nervous); Childhood onset dystonia, chorea or related movement…	2
BCAS3	LoF	Hengel-Maroofian-Schols syndrome (619641) (AR)	Childhood onset hereditary spastic paraplegia (AR ) (Nervous); DDG2P (AR ) (Congenital)	2
BCAT2	LoF	Hypervalinemia and hyperleucine-isoleucinemia (618850) (AR)	Likely inborn error of metabolism - targeted testing not possible (AR ) (Endocrine/Metabolic)	1
BCKDHA	LoF	Maple syrup urine disease, type Ia (248600) (AR)	Severe Paediatric Disorders (AR ) (-); Hyperammonaemia (AR ) (Endocrine/Metabolic); Early onset or syndromic epilepsy (AR ) (Nervous); DDG2P (AR ) (Congenital)	3
BCKDHB	LoF	Maple syrup urine disease, type Ib (620698) (AR)	Severe Paediatric Disorders (AR ) (-); Hyperammonaemia (AR ) (Endocrine/Metabolic); Hereditary neuropathy (AR ) (Nervous); DDG2P (AR ) (Congenital)	3
BCKDK	LoF	Branched-chain keto acid dehydrogenase kinase deficiency (614923) (AR)	Severe Paediatric Disorders (AR ) (-); Undiagnosed metabolic disorders (AR ) (Endocrine/Metabolic); Intellectual disability - microarray and sequencing (AR ) (Nervous)	2
BCL10	LoF	?Immunodeficiency 37 (616098) (AR);{Lymphoma, follicular, somatic} (605027);{Male germ cell tumor, somatic} (273300);{Mesothelioma, somatic} (156240);{Sezary syndrome, somatic};Lymphoma, MALT, somatic (137245);?Immunodeficiency 37 (616098) (AR);{Lymphoma, follicular, somatic} (605027);{Male germ cell tumor, somatic} (273300);{Mesothelioma, somatic} (156240);{Sezary syndrome, somatic};Lymphoma, MA…	COVID-19 research (AR ) (Blood/Immune)	1
BCL11A	LoF	Dias-Logan syndrome (617101) (AD)	Severe Paediatric Disorders (AD ) (-); Intellectual disability - microarray and sequencing (AD ) (Nervous); Fetal anomalies (AD ) (Congenital)	2
BCL11B	LoF	Immunodeficiency 49, severe combined (617237) (AD);Intellectual developmental disorder with dysmorphic facies, speech delay, and T-cell abnormalities (618092) (AD)	DDG2P (AD ) (Congenital); Severe Paediatric Disorders (AD ) (-); Rare syndromic craniosynostosis or isolated multisuture synostosis (AD ) (Musculoskeletal/Connective); Intellectual disability - microarray and sequencing (AD ) (Nervous); COVID-19 research (AD ) (Blood/Immune)	4
BCOR	LoF	Microphthalmia, syndromic 2 (300166) (XLD)	DDG2P (XLD ) (Congenital); Structural eye disease (XLD ) (Eye); Severe Paediatric Disorders (XLD ) (-); Intellectual disability - microarray and sequencing (XLD ) (Nervous); Fetal anomalies (XLD ) (Congenital); Clefting (XLD ) (Musculoskeletal/Connective); Bilateral congenital or childhood onset cataracts (XLD ) (Eye); Anophthalmia or microphthalmia (XLD ) (Eye)	4
BCS1L	LoF	Bjornstad syndrome (262000) (AR);GRACILE syndrome (603358) (AR);Mitochondrial complex III deficiency, nuclear type 1 (124000) (AR)	Severe Paediatric Disorders (AR ) (-); White matter disorders and cerebral calcification - narrow panel (AR ) (Nervous); Undiagnosed metabolic disorders (AR ) (Endocrine/Metabolic); Monogenic hearing loss (AR ) (Ear); Mitochondrial liver disease, including transient infantile liver failure (AR ) (Endocrine/Metabolic); Fetal anomalies (AR ) (Congenital); Cholestasis (AR ) (Digestive)	5
BEST1	LoF	?Microcornea, rod-cone dystrophy, cataract, and posterior staphyloma 2 (193220) (AD);Bestrophinopathy, autosomal recessive (611809);Macular dystrophy, vitelliform, 2 (153700) (AD);Retinitis pigmentosa-50 (613194);Retinitis pigmentosa, concentric (613194);Vitreoretinochoroidopathy (193220) (AD)	Structural eye disease (AD ) (Eye)	1
BFSP1	LoF	Cataract 33, multiple types (611391) (AD, AR);Cataract 33, multiple types (611391) (AD, AR)	Bilateral congenital or childhood onset cataracts (AD ) (Eye)	1
BFSP2	LoF	Cataract 12, multiple types (611597) (AD)	Fetal anomalies (AD ) (Congenital); Severe Paediatric Disorders (AD ) (-); Bilateral congenital or childhood onset cataracts (AD ) (Eye)	2
BGN	LoF	Meester-Loeys syndrome (300989) (XL);Spondyloepimetaphyseal dysplasia, X-linked (300106) (XLR)	DDG2P (XLD ) (Congenital); Thoracic aortic aneurysm or dissection GMS (XLD ) (Circulatory); Thoracic aortic aneurysm or dissection (XLD ) (Circulatory); Severe Paediatric Disorders (XLD ) (-); Fetal anomalies (XLD ) (Congenital); Ehlers Danlos syndrome with a likely monogenic cause (XLD ) (Musculoskeletal/Connective)	3
BHLHA9	LoF	?Camptosynpolydactyly, complex (607539) (AR);Syndactyly, mesoaxial synostotic, with phalangeal reduction (609432) (AR)	DDG2P (AD ) (Congenital); Severe Paediatric Disorders (AR ) (-); Limb disorders (AR ) (Musculoskeletal/Connective)	2
BICD2	LoF	Spinal muscular atrophy, lower extremity-predominant, 2A, autosomal dominant (615290) (AD);Spinal muscular atrophy, lower extremity-predominant, 2B, autosomal dominant (618291) (AD)	Fetal anomalies (AD ) (Congenital); Severe Paediatric Disorders (AD ) (-); Other rare neuromuscular disorders (AD ) (Musculoskeletal/Connective); Hereditary neuropathy (AD ) (Nervous)	3
BICRA	LoF	Coffin-Siris syndrome 12 (619325) (AD)	DDG2P (AD ) (Congenital); Intellectual disability - microarray and sequencing (AD ) (Nervous)	2
BIN1	LoF	Centronuclear myopathy 2 (255200) (AR)	Severe Paediatric Disorders (AR ) (-); Other rare neuromuscular disorders (AR ) (Musculoskeletal/Connective); Fetal anomalies (AR ) (Congenital)	2
BLK	LoF	Maturity-onset diabetes of the young, type 11 (613375) (AD)	COVID-19 research (AD ) (Blood/Immune)	1
BLM	LoF	Bloom syndrome (210900) (AR)	Severe Paediatric Disorders (AR ) (-); Severe microcephaly (AR ) (Nervous); IUGR and IGF abnormalities (AR ) (Congenital); Insulin resistance including lipodystrophy (AR ) (Endocrine/Metabolic); Haematological malignancies for rare disease (AR ) (Neoplasm); COVID-19 research (AR ) (Blood/Immune)	5
BLNK	LoF	?Agammaglobulinemia 4 (613502) (AR)	COVID-19 research (AR ) (Blood/Immune)	1
BLOC1S1	LoF	-	White matter disorders and cerebral calcification - narrow panel (AR ) (Nervous)	1
BLOC1S3	LoF	Hermansky-Pudlak syndrome 8 (614077) (AR)	Albinism or congenital nystagmus (AR ) (Skin); Severe Paediatric Disorders (AR ) (-); Inherited bleeding disorders (AR ) (Blood/Immune)	2
BLOC1S5	LoF	Hermansky-Pudlak syndrome 11 (619172) (AR)	Albinism or congenital nystagmus (AR ) (Skin)	1
BLOC1S6	LoF	Hermansky-Pudlak syndrome 9 (614171) (AR)	Albinism or congenital nystagmus (AR ) (Skin); Severe Paediatric Disorders (AR ) (-); Primary immunodeficiency or monogenic inflammatory bowel disease (AR ) (Blood/Immune); Inherited bleeding disorders (AR ) (Blood/Immune); DDG2P (AR ) (Congenital)	3
BLTP1	LoF	Alkuraya-Kucinskas syndrome (617822) (AR)	Severe Paediatric Disorders (AR ) (-); Structural eye disease (AR ) (Eye); Hydrocephalus (AR ) (Nervous); Fetal anomalies (AR ) (Congenital); Arthrogryposis (AR ) (Musculoskeletal/Connective)	4
BMP1	LoF	Osteogenesis imperfecta, type XIII (614856) (AR)	Skeletal dysplasia (AR ) (Musculoskeletal/Connective); Severe Paediatric Disorders (AR ) (-); Fetal anomalies (AR ) (Congenital)	2
BMP15	LoF	Ovarian dysgenesis 2 (300510) (XL);Premature ovarian failure 4 (300510) (XL)	Primary ovarian insufficiency (XLD ) (Endocrine/Metabolic)	1
BMP2	LoF	{HFE hemochromatosis, modifier of} (235200) (AR);Brachydactyly, type A2 (112600) (AD);Short stature, facial dysmorphism, and skeletal anomalies with or without cardiac anomalies 1 (617877) (AD);{HFE hemochromatosis, modifier of} (235200) (AR);Brachydactyly, type A2 (112600) (AD);Short stature, facial dysmorphism, and skeletal anomalies with or without cardiac anomalies 1 (617877) (AD);{HFE hemoch…	Fetal anomalies (AD ) (Congenital); Severe Paediatric Disorders (AD ) (-); Limb disorders (AD ) (Musculoskeletal/Connective)	2
BMP4	LoF	Microphthalmia, syndromic 6 (607932) (AD);Orofacial cleft 11 (600625)	Limb disorders (AD ) (Musculoskeletal/Connective); Severe Paediatric Disorders (AD ) (-); Ocular coloboma (AD ) (Eye); Intellectual disability - microarray and sequencing (AD ) (Nervous); Fetal anomalies (AD ) (Congenital); Deafness and congenital structural abnormalities (AD ) (Ear)	5
BMP6	LoF	{Iron overload, susceptibility to} (620121) (AD)	Iron metabolism disorders - NOT common HFE mutations (AD ) (Endocrine/Metabolic)	1
BMPER	LoF	Diaphanospondylodysostosis (608022) (AR)	Skeletal dysplasia (AR ) (Musculoskeletal/Connective); Severe Paediatric Disorders (AR ) (-); Fetal anomalies (AR ) (Congenital)	2
BMPR1A	LoF	Polyposis syndrome, hereditary mixed, 2 (610069);Polyposis, juvenile intestinal (174900) (AD);Polyposis syndrome, hereditary mixed, 2 (610069);Polyposis, juvenile intestinal (174900) (AD)	Severe Paediatric Disorders (AD ) (-); Colorectal cancer pertinent cancer susceptibility (AD ) (Neoplasm)	1
BMPR1B	LoF	Acromesomelic dysplasia 3 (609441) (AR);Brachydactyly, type A1, D (616849) (AD);Brachydactyly, type A2 (112600) (AD);Acromesomelic dysplasia 3 (609441) (AR);Brachydactyly, type A1, D (616849) (AD);Brachydactyly, type A2 (112600) (AD);Acromesomelic dysplasia 3 (609441) (AR);Brachydactyly, type A1, D (616849) (AD);Brachydactyly, type A2 (112600) (AD)	Limb disorders (AD ) (Musculoskeletal/Connective); Severe Paediatric Disorders (AD ) (-); Fetal anomalies (AR ) (Congenital)	2
BNC2	LoF	Lower urinary tract obstruction, congenital (618612) (AD)	Fetal anomalies (AD ) (Congenital); Severe Paediatric Disorders (AD ) (-); CAKUT (AD ) (Genitourinary)	2
BOLA3	LoF	Multiple mitochondrial dysfunctions syndrome 2 with hyperglycinemia (614299) (AR)	DDG2P (AR ) (Congenital); White matter disorders and cerebral calcification - narrow panel (AR ) (Nervous); Severe Paediatric Disorders (AR ) (-); Pyruvate dehydrogenase PDH deficiency (AR ) (Endocrine/Metabolic); Possible mitochondrial disorder - nuclear genes (AR ) (Endocrine/Metabolic)	3
BPGM	LoF	Erythrocytosis, familial, 8 (222800) (AR)	Hereditary Erythrocytosis (AD ) (Blood/Immune)	1
BPNT2	LoF	Chondrodysplasia with joint dislocations, GPAPP type (614078) (AR)	Skeletal dysplasia (AR ) (Musculoskeletal/Connective); Severe Paediatric Disorders (AR ) (-); Fetal anomalies (AR ) (Congenital)	2
BPTF	LoF	{Kaposi sarcoma, susceptibility to} (148000) (AD);Neurodevelopmental disorder with dysmorphic facies and distal limb anomalies (617755) (AD)	DDG2P (AD ) (Congenital); Severe Paediatric Disorders (AD ) (-); Severe microcephaly (AD ) (Nervous)	2
BRAF	GoF	Adenocarcinoma of lung, somatic (211980);Cardiofaciocutaneous syndrome (115150) (AD);Colorectal cancer, somatic (114500);LEOPARD syndrome 3 (613707) (AD);Melanoma, malignant, somatic (155600);Nonsmall cell lung cancer, somatic (211980);Noonan syndrome 7 (613706) (AD);Adenocarcinoma of lung, somatic (211980);Cardiofaciocutaneous syndrome (115150) (AD);Colorectal cancer, somatic (114500);LEOPARD sy…	IUGR and IGF abnormalities (AD_GOF ) (Congenital); Severe Paediatric Disorders (AD_GOF ) (-); Rare syndromic craniosynostosis or isolated multisuture synostosis (AD_GOF ) (Musculoskeletal/Connective); Primary lymphoedema (AD_GOF ) (Circulatory); Pituitary hormone deficiency (AD_GOF ) (Endocrine/Metabolic); Pigmentary skin disorders (AD_GOF ) (Skin); Neurofibromatosis Type 1 (AD_GOF ) (Neoplasm); …	7
BRAT1	LoF	Neurodevelopmental disorder with cerebellar atrophy and with or without seizures (618056) (AR);Rigidity and multifocal seizure syndrome, lethal neonatal (614498) (AR)	Severe Paediatric Disorders (AR ) (-); Fetal anomalies (AR ) (Congenital); Early onset or syndromic epilepsy (AR ) (Nervous)	2
BRCA1	LoF	{Breast-ovarian cancer, familial, 1} (604370) (AD, Mu);{Pancreatic cancer, susceptibility to, 4} (614320);Fanconi anemia, complementation group S (617883) (AR)	Severe Paediatric Disorders (AD ) (-); Pigmentary skin disorders (AR ) (Skin); Familial breast cancer (AD ) (Neoplasm); DDG2P (AR ) (Congenital); COVID-19 research (AR ) (Blood/Immune); Additional findings health related - adult specific (AD ) (Neoplasm)	4
BRCA2	LoF	{Breast cancer, male, susceptibility to} (114480) (AD, SMu);{Breast-ovarian cancer, familial, 2} (612555) (AD);{Glioblastoma 3} (613029) (AR);{Medulloblastoma} (155255) (AD, AR, SMu);{Pancreatic cancer 2} (613347);{Prostate cancer} (176807) (AD, SMu);Fanconi anemia, complementation group D1 (605724) (AR);Wilms tumor (194070) (AD, SMu);{Breast cancer, male, susceptibility to} (114480) (AD, SMu);{B…	Familial breast cancer (AD ) (Neoplasm); Severe Paediatric Disorders (AR ) (-); Severe microcephaly (AR ) (Nervous); Radial dysplasia (AR ) (Musculoskeletal/Connective); Pigmentary skin disorders (AR ) (Skin); Fetal anomalies (AR ) (Congenital); Cytopenias and congenital anaemias (AR ) (Blood/Immune); COVID-19 research (AR ) (Blood/Immune); Additional findings health related - adult specific (AD …	6
BRD4	LoF	Cornelia de Lange syndrome 6 (620568) (AD)	DDG2P (AD ) (Congenital); Severe Paediatric Disorders (AD ) (-); Intellectual disability - microarray and sequencing (AD ) (Nervous)	2
BRF1	LoF	Cerebellofaciodental syndrome (616202) (AR)	Severe Paediatric Disorders (AR ) (-); Intellectual disability - microarray and sequencing (AR ) (Nervous); DDG2P (AR ) (Congenital)	2
BRIP1	LoF	{Breast cancer, early-onset, susceptibility to} (114480) (AD, SMu);Fanconi anemia, complementation group J (609054);{Breast cancer, early-onset, susceptibility to} (114480) (AD, SMu);Fanconi anemia, complementation group J (609054);{Breast cancer, early-onset, susceptibility to} (114480) (AD, SMu);Fanconi anemia, complementation group J (609054);{Breast cancer, early-onset, susceptibility to} (11…	Ovarian cancer pertinent cancer susceptibility (AD ) (Neoplasm); Severe Paediatric Disorders (AR ) (-); Severe microcephaly (AR ) (Nervous); Radial dysplasia (AR ) (Musculoskeletal/Connective); Pigmentary skin disorders (AR ) (Skin); Fetal anomalies (AR ) (Congenital); Cytopenias and congenital anaemias (AR ) (Blood/Immune); COVID-19 research (AR ) (Blood/Immune)	6
BRPF1	LoF	Intellectual developmental disorder with dysmorphic facies and ptosis (617333) (AD)	Severe Paediatric Disorders (AD ) (-); Intellectual disability - microarray and sequencing (AD ) (Nervous); Fetal anomalies (AD ) (Congenital)	2
BRSK2	LoF	-	DDG2P (AD ) (Congenital); Severe Paediatric Disorders (AD ) (-); Intellectual disability - microarray and sequencing (AD ) (Nervous)	2
BRWD3	LoF	Intellectual developmental disorder, X-linked 93 (300659) (XLR)	Beckwith-Wiedemann syndrome BWS and other congenital overgrowth disorders (XLR ) (Congenital); Severe Paediatric Disorders (XLR ) (-); Intellectual disability - microarray and sequencing (XLR ) (Nervous); DDG2P (XLR ) (Congenital)	2
BSCL2	LoF	Encephalopathy, progressive, with or without lipodystrophy (615924) (AR);Lipodystrophy, congenital generalized, type 2 (269700) (AR);Neuronopathy, distal hereditary motor, autosomal dominant 13 (619112) (AD);Silver spastic paraplegia syndrome (270685) (AD)	Severe Paediatric Disorders (AD ) (-); Lipodystrophy - childhood onset (AR ) (Endocrine/Metabolic); Hereditary spastic paraplegia (AD ) (Nervous); Diabetes with additional phenotypes suggestive of a monogenic aetiology (AR ) (Endocrine/Metabolic)	2
BSND	LoF	Bartter syndrome, type 4a (602522) (AR);Sensorineural deafness with mild renal dysfunction (602522) (AR)	Severe Paediatric Disorders (AR ) (-); Nephrocalcinosis or nephrolithiasis (AR ) (Genitourinary); Monogenic hearing loss (AR ) (Ear); Fetal anomalies (AR ) (Congenital)	3
BTD	LoF	Biotinidase deficiency (253260) (AR)	Severe Paediatric Disorders (AR ) (-); Undiagnosed metabolic disorders (AR ) (Endocrine/Metabolic); Possible mitochondrial disorder - nuclear genes (AR ) (Endocrine/Metabolic); Ketotic hypoglycaemia (AR ) (Endocrine/Metabolic); Fetal anomalies (AR ) (Congenital); Early onset or syndromic epilepsy (AR ) (Nervous)	3
BTK	LoF	Agammaglobulinemia, X-linked 1 (300755) (XLR);Isolated growth hormone deficiency, type III, with agammaglobulinemia (307200) (XLR)	Severe Paediatric Disorders (XLR ) (-); Primary immunodeficiency or monogenic inflammatory bowel disease (XLR ) (Blood/Immune); Pituitary hormone deficiency (XLR ) (Endocrine/Metabolic); Infantile enterocolitis & monogenic inflammatory bowel disease (XLR ) (Digestive); COVID-19 research (XLR ) (Blood/Immune); Agammaglobulinaemia with absent BTK expression (XLR ) (Blood/Immune)	3
BUB1	LoF	Colorectal cancer with chromosomal instability, somatic (114500);Microcephaly 30, primary, autosomal recessive (620183) (AR);Colorectal cancer with chromosomal instability, somatic (114500);Microcephaly 30, primary, autosomal recessive (620183) (AR);Colorectal cancer with chromosomal instability, somatic (114500);Microcephaly 30, primary, autosomal recessive (620183) (AR);Colorectal cancer with c…	Intellectual disability - microarray and sequencing (AR ) (Nervous); DDG2P (AR ) (Congenital)	2
BUB1B	LoF	[Premature chromatid separation trait] (176430) (AD);Colorectal cancer, somatic (114500);Mosaic variegated aneuploidy syndrome 1 (257300) (AR);[Premature chromatid separation trait] (176430) (AD);Colorectal cancer, somatic (114500);Mosaic variegated aneuploidy syndrome 1 (257300) (AR);[Premature chromatid separation trait] (176430) (AD);Colorectal cancer, somatic (114500);Mosaic variegated aneupl…	Severe Paediatric Disorders (AR ) (-); Hydrocephalus (AR ) (Nervous); Fetal anomalies (AR ) (Congenital); Familial rhabdomyosarcoma (AR ) (Neoplasm)	3
C12orf4	LoF	Intellectual developmental disorder, autosomal recessive 66 (618221) (AR)	Severe Paediatric Disorders (AR ) (-); Intellectual disability - microarray and sequencing (AR ) (Nervous)	1
C12orf57	LoF	Temtamy syndrome (218340) (AR)	Severe Paediatric Disorders (AR ) (-); Ocular coloboma (AR ) (Eye); Early onset or syndromic epilepsy (AR ) (Nervous); DDG2P (AR ) (Congenital)	3
C14orf39	LoF	?Premature ovarian failure 18 (619203) (AR);Spermatogenic failure 52 (619202) (AR)	Primary ovarian insufficiency (AR ) (Endocrine/Metabolic)	1
C19orf12	LoF	?Spastic paraplegia 43, autosomal recessive (615043) (AR);Neurodegeneration with brain iron accumulation 4 (614298) (AD, AR)	Severe Paediatric Disorders (AD ) (-); Undiagnosed metabolic disorders (AD ) (Endocrine/Metabolic); Parkinson Disease and Complex Parkinsonism (AD ) (Nervous); Optic neuropathy (AD ) (Eye)	3
C1QA	LoF	C1q deficiency 1 (613652) (AR)	Severe Paediatric Disorders (AR ) (-); COVID-19 research (AR ) (Blood/Immune)	1
C1QB	LoF	C1q deficiency 2 (620321) (AR)	Severe Paediatric Disorders (AR ) (-); COVID-19 research (AR ) (Blood/Immune)	1
C1QBP	LoF	Combined oxidative phosphorylation deficiency 33 (617713) (AR)	Severe Paediatric Disorders (AR ) (-); Possible mitochondrial disorder - nuclear genes (AR ) (Endocrine/Metabolic); Likely inborn error of metabolism - targeted testing not possible (AR ) (Endocrine/Metabolic); Fetal anomalies (AR ) (Congenital)	2
C1QC	LoF	C1q deficiency 3 (620322) (AR)	Severe Paediatric Disorders (AR ) (-); COVID-19 research (AR ) (Blood/Immune)	1
C1QTNF5	LoF	Retinal degeneration, late-onset, autosomal dominant (605670) (AD)	Retinal disorders (AD ) (Eye)	1
C1R	LoF+GoF	Ehlers-Danlos syndrome, periodontal type, 1 (130080) (AD)	Ehlers Danlos syndrome with a likely monogenic cause (AD ) (Musculoskeletal/Connective); Severe Paediatric Disorders (AD ) (-); COVID-19 research (AD ) (Blood/Immune)	2
C1S	LoF+GoF	C1s deficiency (613783);Ehlers-Danlos syndrome, periodontal type, 2 (617174) (AD)	Ehlers Danlos syndrome with a likely monogenic cause (AD_GOF ) (Musculoskeletal/Connective); Severe Paediatric Disorders (AD_GOF ) (-); COVID-19 research (AD_GOF ) (Blood/Immune)	2
C2	LoF	{Macular degeneration, age-related, 14, reduced risk of} (615489) (DD);C2 deficiency (217000) (AR)	Severe Paediatric Disorders (AR ) (-); COVID-19 research (AR ) (Blood/Immune)	1
C2CD3	LoF	Orofaciodigital syndrome XIV (615948) (AR)	Thoracic dystrophies (AR ) (Musculoskeletal/Connective); Severe Paediatric Disorders (AR ) (-); Rare multisystem ciliopathy disorders (AR ) (Congenital); Intellectual disability - microarray and sequencing (AR ) (Nervous); Fetal anomalies (AR ) (Congenital)	3
C2orf69	LoF	Combined oxidative phosphorylation deficiency 53 (619423) (AR)	White matter disorders and cerebral calcification - narrow panel (AR ) (Nervous); Primary immunodeficiency or monogenic inflammatory bowel disease (AR ) (Blood/Immune); Mitochondrial disorders (AR ) (Endocrine/Metabolic)	3
C3	LoF+GoF	{Hemolytic uremic syndrome, atypical, susceptibility to, 5} (612925) (AD);{Macular degeneration, age-related, 9} (611378);C3 deficiency (613779) (AR)	Membranoproliferative glomerulonephritis including C3 glomerulopathy (AD_GOF ) (Genitourinary); Severe Paediatric Disorders (AR ) (-); COVID-19 research (AD_GOF ) (Blood/Immune); Atypical haemolytic uraemic syndrome (AD_GOF ) (Blood/Immune)	2
C3orf52	LoF	Hypotrichosis 15 (620177) (AR)	Ectodermal dysplasia (AR ) (Skin)	1
C4A	LoF	[Blood group, Rodgers] (614374);C4a deficiency (614380) (AR)	Severe Paediatric Disorders (AR ) (-); COVID-19 research (AR ) (Blood/Immune)	1
C4B	LoF	C4B deficiency (614379)	Severe Paediatric Disorders (AR ) (-); COVID-19 research (AR ) (Blood/Immune)	1
C5	LoF	[Eculizumab, poor response to] (615749) (AD);C5 deficiency (609536) (AR)	Severe Paediatric Disorders (AR ) (-); COVID-19 research (AR ) (Blood/Immune)	1
C6	LoF	C6 deficiency (612446) (AR)	Severe Paediatric Disorders (AR ) (-); COVID-19 research (AR ) (Blood/Immune)	1
C7	LoF	C7 deficiency (610102)	Severe Paediatric Disorders (AR ) (-); COVID-19 research (AR ) (Blood/Immune)	1
C8A	LoF	C8 deficiency, type I (613790) (AR)	Severe Paediatric Disorders (AR ) (-); COVID-19 research (AR ) (Blood/Immune)	1
C8B	LoF	C8 deficiency, type II (613789) (AR)	Severe Paediatric Disorders (AR ) (-); COVID-19 research (AR ) (Blood/Immune)	1
C8G	LoF	-	Severe Paediatric Disorders (AR ) (-); COVID-19 research (AR ) (Blood/Immune)	1
C9	LoF	{Macular degeneration, age-related, 15, susceptibility to} (615591) (AD);C9 deficiency (613825)	Severe Paediatric Disorders (AR ) (-); COVID-19 research (AR ) (Blood/Immune)	1
CA2	LoF	Osteopetrosis, autosomal recessive 3, with renal tubular acidosis (259730) (AR)	Skeletal dysplasia (AR ) (Musculoskeletal/Connective); Severe Paediatric Disorders (AR ) (-); Nephrocalcinosis or nephrolithiasis (AR ) (Genitourinary); Intellectual disability - microarray and sequencing (AR ) (Nervous); Fetal anomalies (AR ) (Congenital)	4
CA5A	LoF	Hyperammonemia due to carbonic anhydrase VA deficiency (615751) (AR)	Severe Paediatric Disorders (AR ) (-); Possible mitochondrial disorder - nuclear genes (AR ) (Endocrine/Metabolic); Hyperammonaemia (AR ) (Endocrine/Metabolic); DDG2P (AR ) (Congenital)	2
CA8	LoF	Spinocerebellar ataxia, autosomal recessive 34 (613227) (AR)	Severe Paediatric Disorders (AR ) (-); Fetal anomalies (AR ) (Congenital); Ataxia and cerebellar anomalies - narrow panel (AR ) (Nervous)	2
CABP2	LoF	Deafness, autosomal recessive 93 (614899) (AR)	Monogenic hearing loss (AR ) (Ear)	1
CABP4	LoF	Cone-rod synaptic disorder, congenital nonprogressive (610427) (AR)	Retinal disorders (AR ) (Eye)	1
CACNA1A	LoF+GoF	Developmental and epileptic encephalopathy 42 (617106) (AD);Episodic ataxia, type 2 (108500) (AD);Migraine, familial hemiplegic, 1 (141500) (AD);Migraine, familial hemiplegic, 1, with progressive cerebellar ataxia (141500) (AD);Spinocerebellar ataxia 6 (183086) (AD)	DDG2P (AD ) (Congenital); Skeletal Muscle Channelopathies (AD ) (Musculoskeletal/Connective); Severe Paediatric Disorders (AD ) (-); Infantile nystagmus (AD ) (Eye); Brain channelopathy (AD ) (Nervous); Albinism or congenital nystagmus (AD ) (Skin)	5
CACNA1B	LoF	Neurodevelopmental disorder with seizures and nonepileptic hyperkinetic movements (618497) (AR)	Severe Paediatric Disorders (AR ) (-); Early onset or syndromic epilepsy (AR ) (Nervous); DDG2P (AR ) (Congenital)	2
CACNA1C	GoF	Brugada syndrome 3 (611875) (AD);Long QT syndrome 8 (618447) (AD);Neurodevelopmental disorder with hypotonia, language delay, and skeletal defects with or without seizures (620029) (AD);Timothy syndrome (601005) (AD)	Fetal anomalies (AD_GOF ) (Congenital); Severe Paediatric Disorders (AD_GOF ) (-); Hypertrophic cardiomyopathy (AD_GOF ) (Circulatory); Early onset or syndromic epilepsy (AD_GOF ) (Nervous); Congenital hyperinsulinism (AD_GOF ) (Endocrine/Metabolic)	4
CACNA1D	GoF	Primary aldosteronism, seizures, and neurologic abnormalities (615474) (AD);Sinoatrial node dysfunction and deafness (614896) (AR)	Severe Paediatric Disorders (AD_GOF ) (-); Early onset or syndromic epilepsy (AD_GOF ) (Nervous); DDG2P (AD_GOF ) (Congenital); Congenital hyperinsulinism (AD_GOF ) (Endocrine/Metabolic)	3
CACNA1E	GoF	Developmental and epileptic encephalopathy 69 (618285) (AD)	Fetal anomalies (AD_GOF ) (Congenital); Severe Paediatric Disorders (AD_GOF ) (-); Early onset or syndromic epilepsy (AD_GOF ) (Nervous); Arthrogryposis (AD_GOF ) (Musculoskeletal/Connective)	3
CACNA1F	LoF	Aland Island eye disease (300600) (XL);Cone-rod dystrophy, X-linked, 3 (300476) (XLR);Night blindness, congenital stationary (incomplete), 2A, X-linked (300071) (XL)	Albinism or congenital nystagmus (XLR ) (Skin); Severe Paediatric Disorders (XLR ) (-); Retinal disorders (XLR ) (Eye)	2
CACNA1G	LoF+GoF	Spinocerebellar ataxia 42 (616795) (AD);Spinocerebellar ataxia 42, early-onset, severe, with neurodevelopmental deficits (618087) (AD)	Fetal anomalies (AD ) (Congenital); Severe Paediatric Disorders (AD ) (-); Ataxia and cerebellar anomalies - narrow panel (AD ) (Nervous)	2
CACNA1I	GoF	Neurodevelopmental disorder with speech impairment and with or without seizures (620114) (AD)	Early onset or syndromic epilepsy (AD_GOF ) (Nervous)	1
CACNA1S	LoF	{Malignant hyperthermia susceptibility 5} (601887) (AD);{Thyrotoxic periodic paralysis, susceptibility to, 1} (188580) (AD);Congenital myopathy 18 due to dihydropyridine receptor defect (620246) (AD, AR);Hypokalemic periodic paralysis, type 1 (170400) (AD)	Severe Paediatric Disorders (AD ) (-); Rhabdomyolysis and metabolic muscle disorders (AD ) (Musculoskeletal/Connective); Malignant hyperthermia (AD ) (Musculoskeletal/Connective)	1
CACNA2D1	LoF	Developmental and epileptic encephalopathy 110 (620149) (AR)	Intellectual disability - microarray and sequencing (AR ) (Nervous)	1
CACNA2D2	LoF	Cerebellar atrophy with seizures and variable developmental delay (618501) (AR)	Hereditary ataxia (AR ) (Nervous)	1
CACNA2D4	LoF	Retinal cone dystrophy 4 (610478) (AR)	Retinal disorders (AR ) (Eye)	1
CACNB4	LoF	?Episodic ataxia, type 5 (613855) (AD);{Epilepsy, idiopathic generalized, susceptibility to, 9} (607682) (AD);{Epilepsy, juvenile myoclonic, susceptibility to, 6} (607682) (AD)	Severe Paediatric Disorders (AD ) (-); Brain channelopathy (AD ) (Nervous)	1
CAD	LoF	Developmental and epileptic encephalopathy 50 (616457) (AR)	Severe Paediatric Disorders (AR ) (-); DDG2P (AR ) (Congenital); Ataxia and cerebellar anomalies - narrow panel (AR ) (Nervous)	2
CALM1	LoF	Long QT syndrome 14 (616247) (AD);Ventricular tachycardia, catecholaminergic polymorphic, 4 (614916) (AD)	Long QT syndrome (AD ) (Circulatory)	1
CALM2	LoF	Long QT syndrome 15 (616249) (AD)	Long QT syndrome (AD ) (Circulatory)	1
CALM3	LoF	?Ventricular tachycardia, catecholaminergic polymorphic 6 (618782) (AD);Long QT syndrome 16 (618782) (AD)	Long QT syndrome (AD ) (Circulatory)	1
CAMK2A	LoF+GoF	?Intellectual developmental disorder, autosomal recessive 63 (618095) (AR);Intellectual developmental disorder, autosomal dominant 53 (617798) (AD)	DDG2P (AD ) (Congenital); Severe Paediatric Disorders (AD ) (-); Intellectual disability - microarray and sequencing (AD ) (Nervous)	2
CAMK2B	LoF+GoF	Intellectual developmental disorder, autosomal dominant 54 (617799) (AD)	DDG2P (AD ) (Congenital); Severe Paediatric Disorders (AD ) (-); Severe microcephaly (AD ) (Nervous)	2
CAMK2G	GoF	Intellectual developmental disorder, autosomal dominant 59 (618522) (AD)	DDG2P (AD_GOF ) (Congenital)	1
CAMK4	LoF	-	Intellectual disability - microarray and sequencing (AD ) (Nervous)	1
CAMSAP1	LoF	Cortical dysplasia, complex, with other brain malformations 12 (620316) (AR)	DDG2P (AR ) (Congenital)	1
CAMTA1	LoF	Cerebellar dysfunction with variable cognitive and behavioral abnormalities (614756) (AD)	DDG2P (AD ) (Congenital); Severe Paediatric Disorders (AD ) (-); Ataxia and cerebellar anomalies - narrow panel (AD ) (Nervous)	2
CANT1	LoF	Desbuquois dysplasia 1 (251450) (AR);Epiphyseal dysplasia, multiple, 7 (617719) (AR)	Skeletal dysplasia (AR ) (Musculoskeletal/Connective); Severe Paediatric Disorders (AR ) (-); Fetal anomalies (AR ) (Congenital)	2
CAPN1	LoF	Spastic paraplegia 76, autosomal recessive (616907) (AR)	Severe Paediatric Disorders (AR ) (-); Hereditary spastic paraplegia (AR ) (Nervous)	1
CAPN15	LoF	Oculogastrointestinal neurodevelopmental syndrome (619318) (AR)	Intellectual disability - microarray and sequencing (AR ) (Nervous); Anophthalmia or microphthalmia (AR ) (Eye)	2
CAPN3	LoF	Muscular dystrophy, limb-girdle, autosomal dominant 4 (618129) (AD);Muscular dystrophy, limb-girdle, autosomal recessive 1 (253600) (AR)	Severe Paediatric Disorders (AD ) (-); Other rare neuromuscular disorders (AR ) (Musculoskeletal/Connective)	1
CAPN5	GoF	Vitreoretinopathy, neovascular inflammatory (193235) (AD)	Retinal disorders (AD_GOF ) (Eye)	1
CAPRIN1	LoF+GoF	Neurodegeneration, childhood-onset, with cerebellar ataxia and cognitive decline (620636) (AD);Neurodevelopmental disorder with language impairment, autism, and attention deficit-hyperactivity disorder (620782) (AD)	DDG2P (AD ) (Congenital); Early onset or syndromic epilepsy (AD ) (Nervous)	2
CARD11	LoF+GoF	B-cell expansion with NFKB and T-cell anergy (616452) (AD);Immunodeficiency 11A (615206) (AR);Immunodeficiency 11B with atopic dermatitis (617638) (AD)	Rare genetic inflammatory skin disorders (AD_GOF ) (Skin); Severe Paediatric Disorders (AD_GOF ) (-); Severe multi-system atopic disease with high IgE (AD_GOF ) (Blood/Immune)	2
CARD14	GoF	Pityriasis rubra pilaris (173200) (AD);Psoriasis 2 (602723) (AD)	Palmoplantar keratoderma and erythrokeratodermas (AD_GOF ) (Skin); Severe Paediatric Disorders (AD_GOF ) (-); COVID-19 research (AD_GOF ) (Blood/Immune); Autoinflammatory disorders (AD_GOF ) (Musculoskeletal/Connective)	3
CARD9	LoF	Immunodeficiency 103, susceptibility to fungal infection (212050) (AR)	Rare genetic inflammatory skin disorders (AR ) (Skin); Severe Paediatric Disorders (AR ) (-); COVID-19 research (AR ) (Blood/Immune)	2
CARMIL2	LoF	Immunodeficiency 58 (618131) (AR)	Severe Paediatric Disorders (AR ) (-); COVID-19 research (AR ) (Blood/Immune)	1
CARS1	LoF	Microcephaly, developmental delay, and brittle hair syndrome (618891) (AR)	Xeroderma pigmentosum, Trichothiodystrophy or Cockayne syndrome (AR ) (Skin); Severe Paediatric Disorders (AR ) (-); Intellectual disability - microarray and sequencing (AR ) (Nervous); DDG2P (AR ) (Congenital)	3
CARS2	LoF	Combined oxidative phosphorylation deficiency 27 (616672) (AR)	Severe Paediatric Disorders (AR ) (-); Possible mitochondrial disorder - nuclear genes (AR ) (Endocrine/Metabolic); Likely inborn error of metabolism - targeted testing not possible (AR ) (Endocrine/Metabolic); Early onset or syndromic epilepsy (AR ) (Nervous); DDG2P (AR ) (Congenital)	3
CASK	LoF	FG syndrome 4 (300422) (XLR);Intellectual developmental disorder and microcephaly with pontine and cerebellar hypoplasia (300749) (XL);Intellectual developmental disorder, with or without nystagmus (300422) (XLR)	DDG2P (XLR ) (Congenital); Severe Paediatric Disorders (XLR ) (-); Severe microcephaly (XLR ) (Nervous); Malformations of cortical development (XLR ) (Nervous); Intellectual disability - microarray and sequencing (XLR ) (Nervous); Hereditary ataxia with onset in adulthood (XLR ) (Nervous); Hereditary ataxia (XLR ) (Nervous); Fetal anomalies (XLR ) (Congenital); Early onset or syndromic epilepsy (…	3
CASP10	LoF	Autoimmune lymphoproliferative syndrome, type II (603909) (AD);Gastric cancer, somatic (613659);Lymphoma, non-Hodgkin, somatic (605027);Autoimmune lymphoproliferative syndrome, type II (603909) (AD);Gastric cancer, somatic (613659);Lymphoma, non-Hodgkin, somatic (605027);Autoimmune lymphoproliferative syndrome, type II (603909) (AD);Gastric cancer, somatic (613659);Lymphoma, non-Hodgkin, somatic …	Severe Paediatric Disorders (AD ) (-); COVID-19 research (AD ) (Blood/Immune)	1
CASP14	LoF	Ichthyosis, congenital, autosomal recessive 12 (617320) (AR)	Palmoplantar keratodermas (AR ) (Skin)	1
CASP8	LoF	?Caspase 8 lymphadenopathy syndrome (607271) (AR);{Breast cancer, protection against} (114480) (AD, SMu);{Lung cancer, protection against} (211980) (AD, SMu);Hepatocellular carcinoma, somatic (114550);?Caspase 8 lymphadenopathy syndrome (607271) (AR);{Breast cancer, protection against} (114480) (AD, SMu);{Lung cancer, protection against} (211980) (AD, SMu);Hepatocellular carcinoma, somatic (11455…	COVID-19 research (AR ) (Blood/Immune)	1
CASQ1	LoF	Myopathy, vacuolar, with CASQ1 aggregates (616231) (AD)	Severe Paediatric Disorders (AD ) (Musculoskeletal/Connective)	1
CASQ2	LoF	Ventricular tachycardia, catecholaminergic polymorphic, 2 (611938) (AR)	Severe Paediatric Disorders (AR ) (-); Catecholaminergic polymorphic VT (AR ) (Circulatory)	1
CASR	LoF+GoF	{?Epilepsy idiopathic generalized, susceptibility to, 8} (612899) (AD);Hyperparathyroidism, neonatal (239200) (AD, AR);Hypocalcemia, autosomal dominant (601198) (AD);Hypocalcemia, autosomal dominant, with Bartter syndrome (601198) (AD);Hypocalciuric hypercalcemia, type I (145980) (AD)	Fetal anomalies (AD ) (Congenital); Skeletal dysplasia (AD ) (Musculoskeletal/Connective); Severe Paediatric Disorders (AD ) (-); Nephrocalcinosis or nephrolithiasis (AD ) (Genitourinary); Familial hypoparathyroidism (AD ) (Endocrine/Metabolic)	4
CAST	LoF	Peeling skin with leukonychia, acral punctate keratoses, cheilitis, and knuckle pads (616295) (AR)	Palmoplantar keratoderma and erythrokeratodermas (AR ) (Skin)	1
CAT	LoF	Acatalasemia (614097)	Severe Paediatric Disorders (AD ) (-); Peroxisomal disorders (AD ) (Endocrine/Metabolic)	1
CAV1	LoF	Lipodystrophy, congenital generalized, type 3 (612526) (AR);Lipodystrophy, familial partial, type 7 (606721) (AD);Pulmonary hypertension, primary, 3 (615343) (AD)	Lipodystrophy - childhood onset (AD ) (Endocrine/Metabolic)	1
CAV3	LoF+GoF	Cardiomyopathy, familial hypertrophic (192600) (AD, DD);Creatine phosphokinase, elevated serum (123320) (AD);Long QT syndrome 9 (611818) (AD);Myopathy, distal, Tateyama type (614321) (AD);Rippling muscle disease 2 (606072) (AD);Cardiomyopathy, familial hypertrophic (192600) (AD, DD);Creatine phosphokinase, elevated serum (123320) (AD);Long QT syndrome 9 (611818) (AD);Myopathy, distal, Tateyama ty…	Severe Paediatric Disorders (AD ) (-); Rhabdomyolysis and metabolic muscle disorders (AD ) (Musculoskeletal/Connective)	1
CAVIN1	LoF	Lipodystrophy, congenital generalized, type 4 (613327) (AR)	Severe Paediatric Disorders (AR ) (-); Lipodystrophy - childhood onset (AR ) (Endocrine/Metabolic); Insulin resistance including lipodystrophy (AR ) (Endocrine/Metabolic); Congenital muscular dystrophy (AR ) (Musculoskeletal/Connective)	2
CBL	GoF	?Juvenile myelomonocytic leukemia (607785) (AD, SMu);Noonan syndrome-like disorder with or without juvenile myelomonocytic leukemia (613563) (AD);?Juvenile myelomonocytic leukemia (607785) (AD, SMu);Noonan syndrome-like disorder with or without juvenile myelomonocytic leukemia (613563) (AD)	IUGR and IGF abnormalities (AD_GOF ) (Congenital); Severe Paediatric Disorders (AD_GOF ) (-); Primary lymphoedema (AD_GOF ) (Circulatory); Pigmentary skin disorders (AD_GOF ) (Skin); Intellectual disability - microarray and sequencing (AD_GOF ) (Nervous); Haematological malignancies for rare disease (AD_GOF ) (Neoplasm)	5
CBLIF	LoF	Intrinsic factor deficiency (261000) (AR)	Severe Paediatric Disorders (AR ) (-); Undiagnosed metabolic disorders (AR ) (Endocrine/Metabolic); Rare anaemia (AR ) (Blood/Immune)	2
CBS	LoF	Homocystinuria, B6-responsive and nonresponsive types (236200) (AR);Thrombosis, hyperhomocysteinemic (236200) (AR)	Severe Paediatric Disorders (AR ) (-); Undiagnosed metabolic disorders (AR ) (Endocrine/Metabolic); Thoracic aortic aneurysm or dissection GMS (AR ) (Circulatory); Structural eye disease (AR ) (Eye); Intellectual disability - microarray and sequencing (AR ) (Nervous); DDG2P (AR ) (Congenital)	5
CBY1	LoF	-	Neurological ciliopathies (AR ) (Nervous)	1
CC2D1A	LoF	Intellectual developmental disorder, autosomal recessive 3 (608443) (AR)	Severe Paediatric Disorders (AR ) (-); Intellectual disability - microarray and sequencing (AR ) (Nervous); DDG2P (AR ) (Congenital)	2
CC2D2A	LoF	COACH syndrome 2 (619111) (AR);Joubert syndrome 9 (612285) (AR);Meckel syndrome 6 (612284) (AR);Retinitis pigmentosa 93 (619845) (AR)	Skeletal dysplasia (AR ) (Musculoskeletal/Connective); Unexplained young onset end-stage renal disease (AR ) (Genitourinary); Severe Paediatric Disorders (AR ) (-); Rare multisystem ciliopathy disorders (AR ) (Congenital); Ocular coloboma (AR ) (Eye); Neonatal cholestasis (AR ) (Digestive); Hydrocephalus (AR ) (Nervous); Ductal plate malformation (AR ) (Congenital)	6
CCBE1	LoF	Hennekam lymphangiectasia-lymphedema syndrome 1 (235510) (AR)	Vascular skin disorders (AR ) (Skin); Severe Paediatric Disorders (AR ) (-); Primary lymphoedema (AR ) (Circulatory); Intestinal failure or congenital diarrhoea (AR ) (Digestive); Intellectual disability - microarray and sequencing (AR ) (Nervous); Fetal hydrops (AR ) (Congenital); COVID-19 research (AR ) (Blood/Immune)	6
CCDC103	LoF	Ciliary dyskinesia, primary, 17 (614679) (AR)	Severe Paediatric Disorders (AR ) (-); Respiratory ciliopathies including non-CF bronchiectasis (AR ) (Respiratory); Primary ciliary disorders (AR ) (Congenital); Laterality disorders and isomerism (AR ) (Congenital)	2
CCDC115	LoF	Congenital disorder of glycosylation, type IIo (616828) (AR)	Severe Paediatric Disorders (AR ) (-); DDG2P (AR ) (Congenital); Congenital disorders of glycosylation (AR ) (Endocrine/Metabolic)	2
CCDC22	LoF	Ritscher-Schinzel syndrome 2 (300963) (XLR)	DDG2P (XLR ) (Congenital); Severe Paediatric Disorders (XLR ) (-); Intellectual disability - microarray and sequencing (XLR ) (Nervous)	2
CCDC32	LoF	Cardiofacioneurodevelopmental syndrome (619123) (AR)	Intellectual disability - microarray and sequencing (AR ) (Nervous); Rare multisystem ciliopathy disorders (AR ) (Congenital); DDG2P (AR ) (Congenital)	2
CCDC39	LoF	Ciliary dyskinesia, primary, 14 (613807) (AR)	Severe Paediatric Disorders (AR ) (-); Respiratory ciliopathies including non-CF bronchiectasis (AR ) (Respiratory); Primary ciliary disorders (AR ) (Congenital); Laterality disorders and isomerism (AR ) (Congenital)	2
CCDC40	LoF	Ciliary dyskinesia, primary, 15 (613808) (AR)	Severe Paediatric Disorders (AR ) (-); Respiratory ciliopathies including non-CF bronchiectasis (AR ) (Respiratory); Primary ciliary disorders (AR ) (Congenital); Laterality disorders and isomerism (AR ) (Congenital)	2
CCDC47	LoF	Trichohepatoneurodevelopmental syndrome (618268) (AR)	Severe Paediatric Disorders (AR ) (-); Intellectual disability - microarray and sequencing (AR ) (Nervous); DDG2P (AR ) (Congenital)	2
CCDC50	LoF	?Deafness, autosomal dominant 44 (607453) (AD)	Monogenic hearing loss (AD ) (Ear)	1
CCDC65	LoF	Ciliary dyskinesia, primary, 27 (615504) (AR)	Severe Paediatric Disorders (AR ) (-); Respiratory ciliopathies including non-CF bronchiectasis (AR ) (Respiratory); Primary ciliary disorders (AR ) (Congenital); DDG2P (AR ) (Congenital)	2
CCDC78	LoF	?Centronuclear myopathy 4 (614807) (AD)	DDG2P (AD ) (Congenital); Congenital myopathy (AD ) (Musculoskeletal/Connective)	2
CCDC8	LoF	3-M syndrome 3 (614205) (AR)	Skeletal dysplasia (AR ) (Musculoskeletal/Connective); Severe Paediatric Disorders (AR ) (-); IUGR and IGF abnormalities (AR ) (Congenital)	2
CCDC82	LoF	-	Intellectual disability - microarray and sequencing (AR ) (Nervous)	1
CCDC88C	LoF+GoF	?Spinocerebellar ataxia 40 (616053) (AD);Hydrocephalus, congenital, 1 (236600) (AR)	Severe Paediatric Disorders (AD_GOF ) (-); Hydrocephalus (AR ) (Nervous); Fetal anomalies (AR ) (Congenital)	2
CCL2	LoF	{Coronary artery disease, modifier of};{HIV-1, resistance to} (609423);{Mycobacterium tuberculosis, susceptibility to} (607948);{Spina bifida, susceptibility to} (182940) (AD);{Coronary artery disease, modifier of};{HIV-1, resistance to} (609423);{Mycobacterium tuberculosis, susceptibility to} (607948);{Spina bifida, susceptibility to} (182940) (AD);{Coronary artery disease, modifier of};{HIV-1, …	COVID-19 research (AD ) (Blood/Immune)	1
CCL5	LoF	{HIV-1 disease, delayed progression of} (609423);{HIV-1 disease, rapid progression of} (609423);{HIV-1 disease, delayed progression of} (609423);{HIV-1 disease, rapid progression of} (609423);{HIV-1 disease, delayed progression of} (609423);{HIV-1 disease, rapid progression of} (609423);{HIV-1 disease, delayed progression of} (609423);{HIV-1 disease, rapid progression of} (609423);{HIV-1 disease,…	COVID-19 research (AD ) (Blood/Immune)	1
CCM2	LoF	Cerebral cavernous malformations-2 (603284) (AD)	Cerebral vascular malformations (AD ) (Congenital)	1
CCN6	LoF	Progressive pseudorheumatoid dysplasia (208230) (AR)	Skeletal dysplasia (AR ) (Musculoskeletal/Connective); Severe Paediatric Disorders (AR ) (-)	1
CCND2	GoF	Megalencephaly-polymicrogyria-polydactyly-hydrocephalus syndrome 3 (615938) (AD)	Segmental overgrowth disorders - Deep sequencing (AD_GOF ) (Congenital); Severe Paediatric Disorders (AD_GOF ) (-); Limb disorders (AD_GOF ) (Musculoskeletal/Connective); Hydrocephalus (AD_GOF ) (Nervous)	3
CCNF	GoF	Frontotemporal dementia and/or amyotrophic lateral sclerosis 5 (619141) (AD)	Adult onset neurodegenerative disorder (AD_GOF ) (Nervous)	1
CCNO	LoF	Ciliary dyskinesia, primary, 29 (615872) (AR)	Severe Paediatric Disorders (AR ) (-); Respiratory ciliopathies including non-CF bronchiectasis (AR ) (Respiratory); Primary ciliary disorders (AR ) (Congenital); DDG2P (AR ) (Congenital)	2
CCNQ	LoF	STAR syndrome (300707) (XLD)	Limb disorders (XLD ) (Musculoskeletal/Connective); Skeletal dysplasia (XLD ) (Musculoskeletal/Connective); Severe Paediatric Disorders (XLD ) (-); Non-syndromic familial congenital anorectal malformations (XLD ) (Digestive); Fetal anomalies (XLD ) (Congenital); DDG2P (XLD ) (Congenital); CAKUT (XLD ) (Genitourinary)	4
CCT5	LoF	?Neuropathy, hereditary sensory, with spastic paraplegia (256840) (AR)	Severe Paediatric Disorders (AR ) (Nervous)	1
CD151	LoF	[Blood group, Raph] (179620);Epidermolysis bullosa simplex 7, with nephropathy and deafness (609057) (AR)	Proteinuric renal disease (AR ) (Genitourinary); DDG2P (AR ) (Congenital)	2
CD19	LoF	Immunodeficiency, common variable, 3 (613493) (AR)	Severe Paediatric Disorders (AR ) (-); COVID-19 research (AR ) (Blood/Immune)	1
CD247	LoF	?Immunodeficiency 25 (610163) (AR)	Severe Paediatric Disorders (AR ) (-); COVID-19 research (AR ) (Blood/Immune)	1
CD27	LoF	Lymphoproliferative syndrome 2 (615122) (AR)	Severe Paediatric Disorders (AR ) (-); COVID-19 research (AR ) (Blood/Immune)	1
CD3D	LoF	Immunodeficiency 19, severe combined (615617) (AR)	Severe Paediatric Disorders (AR ) (-); COVID-19 research (AR ) (Blood/Immune)	1
CD3E	LoF	Immunodeficiency 18 (615615) (AR);Immunodeficiency 18, SCID variant (615615) (AR)	Severe Paediatric Disorders (AR ) (-); COVID-19 research (AR ) (Blood/Immune)	1
CD3G	LoF	Immunodeficiency 17, CD3 gamma deficient (615607) (AR)	Severe Paediatric Disorders (AR ) (-); Infantile enterocolitis & monogenic inflammatory bowel disease (AR ) (Digestive); COVID-19 research (AR ) (Blood/Immune)	2
CD40	LoF	Immunodeficiency with hyper-IgM, type 3 (606843) (AR);Immunodeficiency with hyper-IgM, type 3 (606843) (AR)	Severe Paediatric Disorders (AR ) (-); COVID-19 research (AR ) (Blood/Immune)	1
CD40LG	LoF	Immunodeficiency, X-linked, with hyper-IgM (308230) (XLR)	Severe Paediatric Disorders (XLR ) (-); Primary immunodeficiency or monogenic inflammatory bowel disease (XLR ) (Blood/Immune); Infantile enterocolitis & monogenic inflammatory bowel disease (XLR ) (Digestive); Gastrointestinal epithelial barrier disorders (XLR ) (Digestive); COVID-19 research (XLR ) (Blood/Immune)	2
CD46	LoF	{Hemolytic uremic syndrome, atypical, susceptibility to, 2} (612922) (AD, AR)	Unexplained kidney failure in young people (AD ) (Genitourinary); COVID-19 research (AD ) (Blood/Immune); Atypical haemolytic uraemic syndrome (AD ) (Blood/Immune)	2
CD55	LoF	[Blood group Cromer] (613793) (AR);Complement hyperactivation, angiopathic thrombosis, and protein-losing enteropathy (226300) (AR)	Severe Paediatric Disorders (AR ) (-); Intestinal failure or congenital diarrhoea (AR ) (Digestive); COVID-19 research (AR ) (Blood/Immune)	2
CD59	LoF	Hemolytic anemia, CD59-mediated, with or without immune-mediated polyneuropathy (612300) (AR)	Severe Paediatric Disorders (AR ) (-); Hereditary neuropathy (AR ) (Nervous); Cytopenias and congenital anaemias (AR ) (Blood/Immune); COVID-19 research (AR ) (Blood/Immune)	2
CD70	LoF	Lymphoproliferative syndrome 3 (618261) (AR)	Severe Paediatric Disorders (AR ) (-); COVID-19 research (AR ) (Blood/Immune)	1
CD79A	LoF	Agammaglobulinemia 3 (613501) (AR)	Severe Paediatric Disorders (AR ) (-); COVID-19 research (AR ) (Blood/Immune)	1
CD79B	LoF	Agammaglobulinemia 6 (612692) (AR)	Severe Paediatric Disorders (AR ) (-); COVID-19 research (AR ) (Blood/Immune)	1
CD81	LoF	Immunodeficiency, common variable, 6 (613496) (AR)	Severe Paediatric Disorders (AR ) (-); COVID-19 research (AR ) (Blood/Immune)	1
CD8A	LoF	Immunodeficiency 116 (608957) (AR)	Severe Paediatric Disorders (AR ) (-); COVID-19 research (AR ) (Blood/Immune)	1
CDAN1	LoF	Dyserythropoietic anemia, congenital, type Ia (224120) (AR)	Severe Paediatric Disorders (AR ) (-); Fetal hydrops (AR ) (Congenital); Cytopenias and congenital anaemias (AR ) (Blood/Immune)	2
CDC14A	LoF	Deafness, autosomal recessive 32, with or without immotile sperm (608653) (AR)	Monogenic hearing loss (AR ) (Ear)	1
CDC42	GoF	Takenouchi-Kosaki syndrome (616737) (AD)	Severe Paediatric Disorders (AD_GOF ) (-); Intellectual disability - microarray and sequencing (AD_GOF ) (Nervous); Inherited bleeding disorders (AD_GOF ) (Blood/Immune); DDG2P (AD_GOF ) (Congenital); COVID-19 research (AD_GOF ) (Blood/Immune)	3
CDC45	LoF	Meier-Gorlin syndrome 7 (617063) (AR)	Skeletal dysplasia (AR ) (Musculoskeletal/Connective); Severe Paediatric Disorders (AR ) (-); Fetal anomalies (AR ) (Congenital)	2
CDC6	LoF	?Meier-Gorlin syndrome 5 (613805) (AR)	Intellectual disability - microarray and sequencing (AR ) (Nervous); IUGR and IGF abnormalities (AR ) (Congenital); Deafness and congenital structural abnormalities (AR ) (Ear)	3
CDC73	LoF	Hyperparathyroidism-jaw tumor syndrome (145001) (AD);Hyperparathyroidism, familial primary (145000) (AD);Parathyroid adenoma with cystic changes (145001) (AD);Parathyroid carcinoma (608266)	Parathyroid Cancer (AD ) (Neoplasm); Familial hyperparathyroidism or hypocalciuric hypercalcaemia (AD ) (Endocrine/Metabolic)	2
CDCA7	LoF	Immunodeficiency-centromeric instability-facial anomalies syndrome 3 (616910) (AR)	Severe Paediatric Disorders (AR ) (-); COVID-19 research (AR ) (Blood/Immune)	1
CDH1	LoF	Blepharocheilodontic syndrome 1 (119580) (AD);Breast cancer, lobular, somatic (114480);Diffuse gastric and lobular breast cancer syndrome with or without cleft lip and/or palate (137215) (AD);Endometrial carcinoma, somatic (608089);Ovarian cancer, somatic (167000);Blepharocheilodontic syndrome 1 (119580) (AD);Breast cancer, lobular, somatic (114480);Diffuse gastric and lobular breast cancer syndr…	Fetal anomalies (AD ) (Congenital); Severe Paediatric Disorders (AD ) (-); Clefting (AD ) (Musculoskeletal/Connective); Adult solid tumours for rare disease (AD ) (Neoplasm)	3
CDH11	LoF	Elsahy-Waters syndrome (211380) (AR);Teebi hypertelorism syndrome 2 (619736) (AD)	Severe Paediatric Disorders (AR ) (-); Intellectual disability - microarray and sequencing (AR ) (Nervous); DDG2P (AR ) (Congenital)	2
CDH15	LoF	Intellectual developmental disorder, autosomal dominant 3 (612580) (AD)	Severe Paediatric Disorders (AD ) (Nervous)	1
CDH2	LoF	?Attention deficit-hyperactivity disorder 8 (619957) (AR);Agenesis of corpus callosum, cardiac, ocular, and genital syndrome (618929) (AD);Arrhythmogenic right ventricular dysplasia 14 (618920) (AD)	DDG2P (AD ) (Congenital); Paediatric disorders - additional genes (AD ) (-); Malformations of cortical development (AD ) (Nervous); Dilated and arrhythmogenic cardiomyopathy (AD ) (Circulatory)	3
CDH23	LoF	{Pituitary adenoma 5, multiple types} (617540) (AD);Deafness, autosomal recessive 12 (601386) (AR);Usher syndrome, type 1D (601067) (AR, DR);Usher syndrome, type 1D/F digenic (601067) (AR, DR);{Pituitary adenoma 5, multiple types} (617540) (AD);Deafness, autosomal recessive 12 (601386) (AR);Usher syndrome, type 1D (601067) (AR, DR);Usher syndrome, type 1D/F digenic (601067) (AR, DR)	Severe Paediatric Disorders (AR ) (-); Retinal disorders (AR ) (Eye); Monogenic hearing loss (AR ) (Ear); DDG2P (AR ) (Congenital)	3
CDH3	LoF	Ectodermal dysplasia, ectrodactyly, and macular dystrophy (225280) (AR);Hypotrichosis, congenital, with juvenile macular dystrophy (601553) (AR)	Ectodermal dysplasia (AR ) (Skin); Skeletal dysplasia (AR ) (Musculoskeletal/Connective); Severe Paediatric Disorders (AR ) (-); Retinal disorders (AR ) (Eye); Fetal anomalies (AR ) (Congenital)	4
CDHR1	LoF	Cone-rod dystrophy 15 (613660) (AR);Macular dystrophy, retinal (613660) (AR);Retinitis pigmentosa 65 (613660) (AR)	Retinal disorders (AR ) (Eye)	1
CDIN1	LoF	Dyserythropoietic anemia, congenital, type Ib (615631) (AR)	Severe Paediatric Disorders (AR ) (-); Cytopenias and congenital anaemias (AR ) (Blood/Immune)	1
CDK10	LoF	Al Kaissi syndrome (617694) (AR)	Severe Paediatric Disorders (AR ) (-); Intellectual disability - microarray and sequencing (AR ) (Nervous)	1
CDK13	LoF	Congenital heart defects, dysmorphic facial features, and intellectual developmental disorder (617360) (AD)	Fetal anomalies (AD ) (Congenital); Severe Paediatric Disorders (AD ) (-); Rare syndromic craniosynostosis or isolated multisuture synostosis (AD ) (Musculoskeletal/Connective); Malformations of cortical development (AD ) (Nervous)	3
CDK19	LoF+GoF	Developmental and epileptic encephalopathy 87 (618916) (AD)	DDG2P (AD ) (Congenital); Early onset or syndromic epilepsy (AD ) (Nervous)	2
CDK4	LoF	{Melanoma, cutaneous malignant, 3} (609048) (AD)	Pigmentary skin disorders (AD ) (Skin); Melanoma pertinent cancer susceptibility (AD ) (Neoplasm)	2
CDK5RAP2	LoF	Microcephaly 3, primary, autosomal recessive (604804) (AR)	Severe Paediatric Disorders (AR ) (-); Severe microcephaly (AR ) (Nervous); Fetal anomalies (AR ) (Congenital)	2
CDK8	LoF	Intellectual developmental disorder with hypotonia and behavioral abnormalities (618748) (AD)	Fetal anomalies (AD ) (Congenital); Severe Paediatric Disorders (AD ) (-); Intellectual disability - microarray and sequencing (AD ) (Nervous)	2
CDK9	LoF	-	Bilateral congenital or childhood onset cataracts (AR ) (Eye)	1
CDKL5	LoF	Developmental and epileptic encephalopathy 2 (300672) (XLD)	DDG2P (XLD ) (Congenital); Severe Paediatric Disorders (XLD ) (-); Intellectual disability - microarray and sequencing (XLD ) (Nervous); Fetal anomalies (XLD ) (Congenital); Early onset or syndromic epilepsy (XLD ) (Nervous)	2
CDKN1B	LoF	Multiple endocrine neoplasia, type IV (610755) (AD)	Neuroendocrine cancer pertinent cancer susceptibility (AD ) (Neoplasm); Familial hyperparathyroidism or hypocalciuric hypercalcaemia (AD ) (Endocrine/Metabolic)	2
CDKN1C	LoF+GoF	Beckwith-Wiedemann syndrome (130650) (AD);IMAGE syndrome (614732) (AD)	IUGR and IGF abnormalities (AD ) (Congenital); Skeletal dysplasia (AD ) (Musculoskeletal/Connective); Severe Paediatric Disorders (AD ) (-); Familial rhabdomyosarcoma (AD ) (Neoplasm); Congenital adrenal hypoplasia (AD ) (Endocrine/Metabolic)	4
CDKN2A	LoF	{Melanoma and neural system tumor syndrome} (155755) (AD);{Melanoma-pancreatic cancer syndrome} (606719) (AD);{Melanoma, cutaneous malignant, 2} (155601) (AD)	Pigmentary skin disorders (AD ) (Skin); Melanoma pertinent cancer susceptibility (AD ) (Neoplasm)	2
CDON	LoF	Holoprosencephaly 11 (614226) (AD)	Fetal anomalies (AD ) (Congenital); Structural eye disease (AR ) (Eye); Severe Paediatric Disorders (AD ) (-); Holoprosencephaly - NOT chromosomal (AD ) (Nervous)	3
CDSN	LoF	Hypotrichosis 2 (146520) (AD);Peeling skin syndrome 1 (270300) (AR)	Non-syndromic hypotrichosis (AD ) (Skin); Severe Paediatric Disorders (AD ) (-)	1
CDT1	LoF	Meier-Gorlin syndrome 4 (613804) (AR)	Skeletal dysplasia (AR ) (Musculoskeletal/Connective); Severe Paediatric Disorders (AR ) (-); Severe microcephaly (AR ) (Nervous); IUGR and IGF abnormalities (AR ) (Congenital); Deafness and congenital structural abnormalities (AR ) (Ear)	4
CDX1	LoF	-	Severe Paediatric Disorders (AD ) (-); Paediatric disorders - additional genes (AD ) (-); Non-syndromic familial congenital anorectal malformations (AD ) (Digestive)	1
CDX2	LoF	-	Limb disorders (AD ) (Musculoskeletal/Connective); VACTERL-like phenotypes (AD ) (Congenital)	2
CEACAM16	LoF	Deafness, autosomal dominant 4B (614614) (AD);Deafness, autosomal recessive 113 (618410) (AR)	Monogenic hearing loss (AD ) (Ear)	1
CEBPA	LoF	?Leukemia, acute myeloid (601626) (AD, SMu);Leukemia, acute myeloid, somatic (601626);?Leukemia, acute myeloid (601626) (AD, SMu);Leukemia, acute myeloid, somatic (601626);?Leukemia, acute myeloid (601626) (AD, SMu);Leukemia, acute myeloid, somatic (601626);?Leukemia, acute myeloid (601626) (AD, SMu);Leukemia, acute myeloid, somatic (601626);?Leukemia, acute myeloid (601626) (AD, SMu);Leukemia, a…	Haematological malignancies for rare disease (AD ) (Neoplasm)	1
CEBPE	GoF	?Immunodeficiency 108 with autoinflammation (260570) (AR);Specific granule deficiency (245480) (AD, AR)	COVID-19 research (AD_GOF ) (Blood/Immune); Severe Paediatric Disorders (AR_GOF ) (-)	1
CEL	LoF	Maturity-onset diabetes of the young, type VIII (609812) (AD)	Familial diabetes (AD ) (Endocrine/Metabolic)	1
CELA3B	LoF	-	Pancreatitis (AD ) (Endocrine/Metabolic)	1
CELF2	LoF	Developmental and epileptic encephalopathy 97 (619561) (AD)	DDG2P (AD ) (Congenital); Early onset or syndromic epilepsy (AD ) (Nervous)	2
CELSR1	LoF	Lymphatic malformation 9 (619319) (AD)	Fetal anomalies (AD ) (Congenital); Primary lymphoedema (AD ) (Circulatory)	2
CENPF	LoF	Stromme syndrome (243605) (AR)	Limb disorders (AR ) (Musculoskeletal/Connective); Unexplained young onset end-stage renal disease (AR ) (Genitourinary); Structural eye disease (AR ) (Eye); Severe Paediatric Disorders (AR ) (-); Rare multisystem ciliopathy disorders (AR ) (Congenital); Hydrocephalus (AR ) (Nervous); Fetal anomalies (AR ) (Congenital)	5
CENPJ	LoF	?Seckel syndrome 4 (613676) (AR);Microcephaly 6, primary, autosomal recessive (608393) (AR)	Severe Paediatric Disorders (AR ) (-); Severe microcephaly (AR ) (Nervous); IUGR and IGF abnormalities (AR ) (Congenital)	2
CEP104	LoF	Intellectual developmental disorder, autosomal recessive 77 (619988) (AR);Joubert syndrome 25 (616781) (AR)	Severe Paediatric Disorders (AR ) (-); Unexplained young onset end-stage renal disease (AR ) (Genitourinary); Rare multisystem ciliopathy disorders (AR ) (Congenital); Ophthalmological ciliopathies (AR ) (Eye); Intellectual disability - microarray and sequencing (AR ) (Nervous); Fetal anomalies (AR ) (Congenital)	4
CEP120	LoF	Joubert syndrome 31 (617761) (AR);Short-rib thoracic dysplasia 13 with or without polydactyly (616300) (AR)	Thoracic dystrophies (AR ) (Musculoskeletal/Connective); Severe Paediatric Disorders (AR ) (-); Rare multisystem ciliopathy disorders (AR ) (Congenital); Intellectual disability - microarray and sequencing (AR ) (Nervous); Fetal anomalies (AR ) (Congenital)	3
CEP135	LoF	Microcephaly 8, primary, autosomal recessive (614673) (AR)	Severe Paediatric Disorders (AR ) (-); Severe microcephaly (AR ) (Nervous); Fetal anomalies (AR ) (Congenital)	2
CEP152	LoF	Microcephaly 9, primary, autosomal recessive (614852) (AR);Seckel syndrome 5 (613823) (AR)	Severe Paediatric Disorders (AR ) (-); Severe microcephaly (AR ) (Nervous); Fetal anomalies (AR ) (Congenital)	2
CEP164	LoF	Nephronophthisis 15 (614845) (AR)	Severe Paediatric Disorders (AR ) (-); Tubulointerstitial kidney disease (AR ) (Genitourinary); Retinal disorders (AR ) (Eye); Rare multisystem ciliopathy disorders (AR ) (Congenital); Fetal anomalies (AR ) (Congenital)	3
CEP19	LoF	Morbid obesity and spermatogenic failure (615703) (AR)	Severe early-onset obesity (AR ) (Endocrine/Metabolic)	1
CEP250	LoF	Cone-rod dystrophy and hearing loss 2 (618358) (AR);Cone-rod dystrophy and hearing loss 2 (618358) (AR)	Retinal disorders (AR ) (Eye); Monogenic hearing loss (AR ) (Ear)	2
CEP290	LoF	?Bardet-Biedl syndrome 14 (615991) (AR);Joubert syndrome 5 (610188) (AR);Leber congenital amaurosis 10 (611755);Meckel syndrome 4 (611134) (AR);Senior-Loken syndrome 6 (610189) (AR);?Bardet-Biedl syndrome 14 (615991) (AR);Joubert syndrome 5 (610188) (AR);Leber congenital amaurosis 10 (611755);Meckel syndrome 4 (611134) (AR);Senior-Loken syndrome 6 (610189) (AR)	Skeletal dysplasia (AR ) (Musculoskeletal/Connective); Unexplained young onset end-stage renal disease (AR ) (Genitourinary); Severe Paediatric Disorders (AR ) (-); Rare multisystem ciliopathy disorders (AR ) (Congenital); Intellectual disability - microarray and sequencing (AR ) (Nervous); Glaucoma developmental (Unknown ) (Eye); Fetal anomalies (AR ) (Congenital)	5
CEP41	LoF	Joubert syndrome 15 (614464) (AR)	Severe Paediatric Disorders (AR ) (-); Unexplained young onset end-stage renal disease (AR ) (Genitourinary); Rare multisystem ciliopathy disorders (AR ) (Congenital); Ophthalmological ciliopathies (AR ) (Eye); Intellectual disability - microarray and sequencing (AR ) (Nervous); Fetal anomalies (AR ) (Congenital)	4
CEP55	LoF	Multinucleated neurons, anhydramnios, renal dysplasia, cerebellar hypoplasia, and hydranencephaly (236500) (AR)	Limb disorders (AR ) (Musculoskeletal/Connective); Severe microcephaly (AR ) (Nervous); Fetal anomalies (AR ) (Congenital); CAKUT (AR ) (Genitourinary)	4
CEP57	LoF	Mosaic variegated aneuploidy syndrome 2 (614114) (AR)	Fetal anomalies (AR ) (Congenital); Severe Paediatric Disorders (AR ) (-); Severe microcephaly (AR ) (Nervous)	2
CEP63	LoF	?Seckel syndrome 6 (614728) (AR)	Severe Paediatric Disorders (AR ) (-); Fetal anomalies (AR ) (Congenital)	1
CEP78	LoF	Cone-rod dystrophy and hearing loss (617236) (AR)	Retinal disorders (AR ) (Eye); Monogenic hearing loss (AR ) (Ear)	2
CEP83	LoF	Nephronophthisis 18 (615862) (AR)	Severe Paediatric Disorders (AR ) (-); Tubulointerstitial kidney disease (AR ) (Genitourinary); Rare multisystem ciliopathy disorders (AR ) (Congenital); Hydrocephalus (AR ) (Nervous); Fetal anomalies (AR ) (Congenital)	3
CEP85L	LoF	Lissencephaly 10 (618873) (AD)	DDG2P (AD ) (Congenital); Malformations of cortical development (AD ) (Nervous)	2
CERKL	LoF	Retinitis pigmentosa 26 (608380) (AR)	Retinal disorders (AR ) (Eye)	1
CERS1	LoF	Epilepsy, progressive myoclonic, 8 (616230) (AR)	Early onset or syndromic epilepsy (AR ) (Nervous)	1
CERS3	LoF	Ichthyosis, congenital, autosomal recessive 9 (615023) (AR)	Autosomal recessive congenital ichthyosis (AR ) (Skin); Fetal anomalies (AR ) (Congenital)	2
CERT1	LoF	Intellectual developmental disorder, autosomal dominant 34 (616351) (AD)	Fetal anomalies (AD ) (Congenital); Severe Paediatric Disorders (AD ) (-); Intellectual disability - microarray and sequencing (AD ) (Nervous)	2
CFAP276	LoF	-	Hereditary neuropathy (AD ) (Nervous)	1
CFAP298	LoF	Ciliary dyskinesia, primary, 26 (615500) (AR)	Respiratory ciliopathies including non-CF bronchiectasis (AR ) (Respiratory); Primary ciliary disorders (AR ) (Congenital); Laterality disorders and isomerism (AR ) (Congenital)	2
CFAP300	LoF	Ciliary dyskinesia, primary, 38 (618063) (AR)	Severe Paediatric Disorders (AR ) (-); Respiratory ciliopathies including non-CF bronchiectasis (AR ) (Respiratory); Laterality disorders and isomerism (AR ) (Congenital)	2
CFAP410	LoF	Retinal dystrophy with macular staphyloma (617547) (AR);Spondylometaphyseal dysplasia, axial (602271) (AR)	Thoracic dystrophies (AR ) (Musculoskeletal/Connective); Severe Paediatric Disorders (AR ) (-); Retinal disorders (AR ) (Eye); Rare multisystem ciliopathy disorders (AR ) (Congenital); Fetal anomalies (AR ) (Congenital)	3
CFAP418	LoF	Bardet-Biedl syndrome 21 (617406) (AR);Cone-rod dystrophy 16 (614500) (AR);Retinitis pigmentosa 64 (614500) (AR)	Severe Paediatric Disorders (AR ) (-); Retinal disorders (AR ) (Eye); Fetal anomalies (AR ) (Congenital)	2
CFAP45	LoF	Heterotaxy, visceral, 11, autosomal, with male infertility (619608) (AR)	Laterality disorders and isomerism (AR ) (Congenital)	1
CFAP52	LoF	Heterotaxy, visceral, 10, autosomal, with male infertility (619607) (AR)	Laterality disorders and isomerism (AR ) (Congenital)	1
CFAP53	LoF	Heterotaxy, visceral, 6, autosomal recessive (614779) (AR)	Familial non syndromic congenital heart disease (AR ) (Ear); Paediatric disorders - additional genes (AR ) (-); Laterality disorders and isomerism (AR ) (Congenital)	2
CFB	LoF+GoF	?Complement factor B deficiency (615561) (AR);{Hemolytic uremic syndrome, atypical, susceptibility to, 4} (612924) (AD);{Macular degeneration, age-related, 14, reduced risk of} (615489) (DD)	Membranoproliferative glomerulonephritis including C3 glomerulopathy (AD_GOF ) (Genitourinary); COVID-19 research (AD_GOF ) (Blood/Immune); Atypical haemolytic uraemic syndrome (AD_GOF ) (Blood/Immune)	2
CFC1	LoF	Heterotaxy, visceral, 2, autosomal (605376) (AD)	Severe Paediatric Disorders (AD ) (-); Paediatric disorders - additional genes (AD ) (-); Fetal anomalies (AD ) (Congenital); Familial non syndromic congenital heart disease (AD ) (Ear)	2
CFD	LoF	Complement factor D deficiency (613912) (AR)	Severe Paediatric Disorders (AR ) (-); COVID-19 research (AR ) (Blood/Immune)	1
CFH	LoF	{Hemolytic uremic syndrome, atypical, susceptibility to, 1} (235400) (AD, AR);{Macular degeneration, age-related, 4} (610698) (AD);Basal laminar drusen (126700) (AD);Complement factor H deficiency (609814) (AD, AR)	Severe Paediatric Disorders (AD ) (-); Unexplained kidney failure in young people (AD ) (Genitourinary); Retinal disorders (AD ) (Eye); COVID-19 research (AD ) (Blood/Immune); Atypical haemolytic uraemic syndrome (AD ) (Blood/Immune)	3
CFHR1	LoF	{Hemolytic uremic syndrome, atypical, susceptibility to} (235400) (AD, AR);{Macular degeneration, age-related, reduced risk of} (603075) (AD);{Hemolytic uremic syndrome, atypical, susceptibility to} (235400) (AD, AR);{Macular degeneration, age-related, reduced risk of} (603075) (AD)	Membranoproliferative glomerulonephritis including C3 glomerulopathy (AD ) (Genitourinary); COVID-19 research (AD ) (Blood/Immune); Atypical haemolytic uraemic syndrome (AD ) (Blood/Immune)	2
CFHR2	LoF	-	Membranoproliferative glomerulonephritis including C3 glomerulopathy (AD ) (Genitourinary); COVID-19 research (AD ) (Blood/Immune)	2
CFHR3	LoF	{Hemolytic uremic syndrome, atypical, susceptibility to} (235400) (AD, AR);{Macular degeneration, age-related, reduced risk of} (603075) (AD);{Hemolytic uremic syndrome, atypical, susceptibility to} (235400) (AD, AR);{Macular degeneration, age-related, reduced risk of} (603075) (AD)	Unexplained young onset end-stage renal disease (AD ) (Genitourinary); COVID-19 research (AD ) (Blood/Immune); Atypical haemolytic uraemic syndrome (AD ) (Blood/Immune)	2
CFHR4	LoF	-	COVID-19 research (AD ) (Blood/Immune)	1
CFHR5	LoF+GoF	Nephropathy due to CFHR5 deficiency (614809) (AD)	Severe Paediatric Disorders (AD_GOF ) (-); Membranoproliferative glomerulonephritis including C3 glomerulopathy (AD_GOF ) (Genitourinary); COVID-19 research (AD_GOF ) (Blood/Immune)	2
CFI	LoF	{Hemolytic uremic syndrome, atypical, susceptibility to, 3} (612923) (AD);{Macular degeneration, age-related, 13, susceptibility to} (615439) (AD);Complement factor I deficiency (610984) (AR)	Membranoproliferative glomerulonephritis including C3 glomerulopathy (AD ) (Genitourinary); Severe Paediatric Disorders (AR ) (-); COVID-19 research (AD ) (Blood/Immune); Atypical haemolytic uraemic syndrome (AD ) (Blood/Immune)	2
CFL2	LoF	Nemaline myopathy 7, autosomal recessive (610687) (AR)	Severe Paediatric Disorders (AR ) (-); Other rare neuromuscular disorders (AR ) (Musculoskeletal/Connective); Fetal anomalies (AR ) (Congenital)	2
CFP	LoF	Properdin deficiency, X-linked (312060) (XLR)	Severe Paediatric Disorders (XLR ) (-); Primary immunodeficiency or monogenic inflammatory bowel disease (XLR ) (Blood/Immune); COVID-19 research (XLR ) (Blood/Immune)	1
CFTR	LoF	{Bronchiectasis with or without elevated sweat chloride 1, modifier of} (211400) (AD);{Hypertrypsinemia, neonatal};{Pancreatitis, hereditary} (167800) (AD);Congenital bilateral absence of vas deferens (277180) (AR);Cystic fibrosis (219700) (AR);Sweat chloride elevation without CF;{Bronchiectasis with or without elevated sweat chloride 1, modifier of} (211400) (AD);{Hypertrypsinemia, neonatal};{Pa…	Additional findings reproductive carrier status (AD ) (Congenital); Severe Paediatric Disorders (AD ) (-); Pancreatitis (AR ) (Endocrine/Metabolic); Non-CF bronchiectasis (AR ) (Respiratory); Neonatal cholestasis (AR ) (Digestive); Fetal anomalies (AR ) (Congenital); COVID-19 research (AR ) (Blood/Immune)	5
CHAMP1	LoF	Neurodevelopmental disorder with hypotonia, impaired language, and dysmorphic features (616579) (AD)	Severe Paediatric Disorders (AD ) (-); Severe microcephaly (AD ) (Nervous); Fetal anomalies (AD ) (Congenital)	2
CHAT	LoF	Myasthenic syndrome, congenital, 6, presynaptic (254210) (AR)	Severe Paediatric Disorders (AR ) (-); Other rare neuromuscular disorders (AR ) (Musculoskeletal/Connective); Fetal anomalies (AR ) (Congenital)	2
CHCHD10	GoF	?Myopathy, isolated mitochondrial, autosomal dominant (616209) (AD);Frontotemporal dementia and/or amyotrophic lateral sclerosis 2 (615911) (AD);Spinal muscular atrophy, Jokela type (615048) (AD)	Severe Paediatric Disorders (AD_GOF ) (-); Undiagnosed metabolic disorders (AD_GOF ) (Endocrine/Metabolic); Possible mitochondrial disorder - nuclear genes (AD_GOF ) (Endocrine/Metabolic); Other rare neuromuscular disorders (AD_GOF ) (Musculoskeletal/Connective); Adult onset neurodegenerative disorder (AD_GOF ) (Nervous)	3
CHCHD2	LoF	Parkinson disease 22, autosomal dominant (616710) (AD)	Adult onset neurodegenerative disorder (AD ) (Nervous)	1
CHD1	LoF	Pilarowski-Bjornsson syndrome (617682) (AD)	DDG2P (AD ) (Congenital)	1
CHD2	LoF	Developmental and epileptic encephalopathy 94 (615369) (AD)	DDG2P (AD ) (Congenital); Severe Paediatric Disorders (AD ) (-); Early onset or syndromic epilepsy (AD ) (Nervous)	2
CHD3	LoF	Snijders Blok-Campeau syndrome (618205) (AD)	DDG2P (AD ) (Congenital); Severe Paediatric Disorders (AD ) (-); Intellectual disability - microarray and sequencing (AD ) (Nervous)	2
CHD4	LoF	Sifrim-Hitz-Weiss syndrome (617159) (AD)	VACTERL-like phenotypes (AD ) (Congenital); Severe Paediatric Disorders (AD ) (-); Early onset or syndromic epilepsy (AD ) (Nervous)	2
CHD5	LoF	Parenti-Mignot neurodevelopmental syndrome (619873) (AD)	Early onset or syndromic epilepsy (AD ) (Nervous)	1
CHD7	LoF	CHARGE syndrome (214800) (AD);Hypogonadotropic hypogonadism 5 with or without anosmia (612370) (AD)	Choanal atresia (AD ) (Musculoskeletal/Connective); Unexplained kidney failure in young people (AD ) (Genitourinary); Severe Paediatric Disorders (AD ) (-); Pituitary hormone deficiency (AD ) (Endocrine/Metabolic); Ocular coloboma (AD ) (Eye); IUGR and IGF abnormalities (AD ) (Congenital); Intellectual disability - microarray and sequencing (AD ) (Nervous); Deafness and congenital structural abno…	8
CHD8	LoF	Intellectual developmental disorder with autism and macrocephaly (615032) (AD)	Beckwith-Wiedemann syndrome BWS and other congenital overgrowth disorders (AD ) (Congenital); Severe Paediatric Disorders (AD ) (-); Intellectual disability - microarray and sequencing (AD ) (Nervous)	2
CHEK2	LoF	Osteosarcoma, somatic (259500);Prostate cancer, somatic (176807);Tumor predisposition syndrome 4, breast/prostate/colorectal (609265);Osteosarcoma, somatic (259500);Prostate cancer, somatic (176807);Tumor predisposition syndrome 4, breast/prostate/colorectal (609265);Osteosarcoma, somatic (259500);Prostate cancer, somatic (176807);Tumor predisposition syndrome 4, breast/prostate/colorectal (60926…	Familial breast cancer (AD ) (Neoplasm)	1
CHKA	LoF	Neurodevelopmental disorder with microcephaly, movement abnormalities, and seizures (620023) (AR)	Severe microcephaly (AR ) (Nervous); DDG2P (AR ) (Congenital)	2
CHKB	LoF	Muscular dystrophy, congenital, megaconial type (602541) (AR)	Severe Paediatric Disorders (AR ) (-); Undiagnosed metabolic disorders (AR ) (Endocrine/Metabolic); Rhabdomyolysis and metabolic muscle disorders (AR ) (Musculoskeletal/Connective); Intellectual disability - microarray and sequencing (AR ) (Nervous); Fetal anomalies (AR ) (Congenital)	4
CHM	LoF	Choroideremia (303100) (XL)	DDG2P (XLR ) (Congenital); Severe Paediatric Disorders (XLR ) (-); Retinal disorders (XLR ) (Eye)	2
CHMP1A	LoF	Pontocerebellar hypoplasia, type 8 (614961) (AR)	Severe Paediatric Disorders (AR ) (-); Fetal anomalies (AR ) (Congenital); Ataxia and cerebellar anomalies - narrow panel (AR ) (Nervous)	2
CHMP2B	LoF	Frontotemporal dementia and/or amyotrophic lateral sclerosis 7 (600795) (AD)	Severe Paediatric Disorders (AD ) (-); Early onset dementia encompassing fronto-temporal dementia and prion disease (AD ) (Nervous)	1
CHMP4B	GoF	Cataract 31, multiple types (605387) (AD);Cataract 31, multiple types (605387) (AD)	Bilateral congenital or childhood onset cataracts (AD_GOF ) (Eye)	1
CHRDL1	LoF	Megalocornea 1, X-linked (309300) (XLR)	DDG2P (XLR ) (Congenital); Structural eye disease (XLR ) (Eye); Severe Paediatric Disorders (XLR ) (-); Corneal abnormalities (XLR ) (Eye)	2
CHRM3	LoF	Prune belly syndrome (100100) (AR)	Unexplained kidney failure in young people (AR ) (Genitourinary)	1
CHRNA1	LoF	Multiple pterygium syndrome, lethal type (253290) (AR);Myasthenic syndrome, congenital, 1A, slow-channel (601462) (AD);Myasthenic syndrome, congenital, 1B, fast-channel (608930) (AD, AR)	Severe Paediatric Disorders (AD ) (-); Other rare neuromuscular disorders (AD ) (Musculoskeletal/Connective); Fetal anomalies (AR ) (Congenital)	2
CHRNA2	LoF	Epilepsy, nocturnal frontal lobe, type 4 (610353) (AD)	Severe Paediatric Disorders (AD ) (-); Early onset or syndromic epilepsy (AD ) (Nervous)	1
CHRNA3	LoF	{Lung cancer susceptibility 2} (612052);Bladder dysfunction, autonomic, with impaired pupillary reflex and secondary CAKUT (191800) (AR)	Fetal anomalies (AR ) (Congenital); Paediatric disorders - additional genes (AR ) (-); CAKUT (AR ) (Genitourinary)	2
CHRNA4	GoF	{Nicotine addiction, susceptibility to} (188890);Epilepsy, nocturnal frontal lobe, 1 (600513) (AD);{Nicotine addiction, susceptibility to} (188890);Epilepsy, nocturnal frontal lobe, 1 (600513) (AD);{Nicotine addiction, susceptibility to} (188890);Epilepsy, nocturnal frontal lobe, 1 (600513) (AD)	Severe Paediatric Disorders (AD_GOF ) (-); Early onset or syndromic epilepsy (AD_GOF ) (Nervous); DDG2P (AD_GOF ) (Congenital)	2
CHRNB1	LoF+GoF	?Myasthenic syndrome, congenital, 2C, associated with acetylcholine receptor deficiency (616314) (AR);Myasthenic syndrome, congenital, 2A, slow-channel (616313) (AD)	Fetal anomalies (AD ) (Congenital); Severe Paediatric Disorders (AD ) (-); Other rare neuromuscular disorders (AD ) (Musculoskeletal/Connective)	2
CHRNB2	LoF	Epilepsy, nocturnal frontal lobe, 3 (605375)	DDG2P (AD ) (Congenital); Severe Paediatric Disorders (AD ) (-); Early onset or syndromic epilepsy (AD ) (Nervous)	2
CHRND	LoF	?Myasthenic syndrome, congenital, 3A, slow-channel (616321) (AD);?Myasthenic syndrome, congenital, 3C, associated with acetylcholine receptor deficiency (616323) (AR);Multiple pterygium syndrome, lethal type (253290) (AR);Myasthenic syndrome, congenital, 3B, fast-channel (616322) (AR)	Severe Paediatric Disorders (AD ) (-); Other rare neuromuscular disorders (AD ) (Musculoskeletal/Connective); Fetal anomalies (AR ) (Congenital)	2
CHRNE	LoF	Myasthenic syndrome, congenital, 4A, slow-channel (605809) (AD, AR);Myasthenic syndrome, congenital, 4B, fast-channel (616324) (AR);Myasthenic syndrome, congenital, 4C, associated with acetylcholine receptor deficiency (608931) (AR)	Fetal anomalies (AD ) (Congenital); Severe Paediatric Disorders (AD ) (-); Other rare neuromuscular disorders (AD ) (Musculoskeletal/Connective)	2
CHRNG	LoF	Escobar syndrome (265000) (AR);Multiple pterygium syndrome, lethal type (253290) (AR)	Severe Paediatric Disorders (AR ) (-); Other rare neuromuscular disorders (AR ) (Musculoskeletal/Connective); Fetal anomalies (AR ) (Congenital)	2
CHST14	LoF	Ehlers-Danlos syndrome, musculocontractural type 1 (601776) (AR)	Fetal anomalies (AR ) (Congenital); Skeletal dysplasia (AR ) (Musculoskeletal/Connective); Severe Paediatric Disorders (AR ) (-); Inherited bleeding disorders (AR ) (Blood/Immune); Congenital disorders of glycosylation (AR ) (Endocrine/Metabolic); Arthrogryposis (AR ) (Musculoskeletal/Connective)	4
CHST3	LoF	Spondyloepiphyseal dysplasia with congenital joint dislocations (143095) (AR)	Skeletal dysplasia (AR ) (Musculoskeletal/Connective); Severe Paediatric Disorders (AR ) (-); Fetal anomalies (AR ) (Congenital); Congenital disorders of glycosylation (AR ) (Endocrine/Metabolic)	3
CHST6	LoF	Macular corneal dystrophy (217800) (AR)	Severe Paediatric Disorders (AR ) (-); Corneal abnormalities (AR ) (Eye); Congenital disorders of glycosylation (AR ) (Endocrine/Metabolic)	2
CHSY1	LoF	Temtamy preaxial brachydactyly syndrome (605282) (AR)	Limb disorders (AR ) (Musculoskeletal/Connective); Severe Paediatric Disorders (AR ) (-); Fetal anomalies (AR ) (Congenital); Congenital disorders of glycosylation (AR ) (Endocrine/Metabolic)	3
CHUK	LoF	?Cocoon syndrome (613630) (AR);?Popliteal pterygium syndrome, Bartsocas-Papas type 2 (619339) (AR)	Severe Paediatric Disorders (AR ) (-); Fetal anomalies (AR ) (Congenital)	1
CIB1	LoF	{Epidermodysplasia verruciformis, susceptibility to, 3} (618267) (AR)	Pigmentary skin disorders (AR ) (Skin); COVID-19 research (AR ) (Blood/Immune)	2
CIB2	LoF	Deafness, autosomal recessive 48 (609439) (AR);Usher syndrome, type IJ (614869) (AR)	DDG2P (AR ) (Congenital); Severe Paediatric Disorders (AR ) (-); Monogenic hearing loss (AR ) (Ear)	2
CIC	LoF	Intellectual developmental disorder, autosomal dominant 45 (617600) (AD)	DDG2P (AD ) (Congenital); White matter disorders and cerebral calcification - narrow panel (AD ) (Nervous); Severe Paediatric Disorders (AD ) (-)	2
CIITA	LoF	{Rheumatoid arthritis, susceptibility to} (180300);MHC class II deficiency 1 (209920) (AR);{Rheumatoid arthritis, susceptibility to} (180300);MHC class II deficiency 1 (209920) (AR)	Severe Paediatric Disorders (AR ) (-); COVID-19 research (AR ) (Blood/Immune)	1
CILK1	LoF	{Epilepsy, juvenile myoclonic, susceptibility to, 10} (617924) (AD);Endocrine-cerebroosteodysplasia (612651) (AR)	Severe Paediatric Disorders (AD ) (-); Unexplained young onset end-stage renal disease (AR ) (Genitourinary); Thoracic dystrophies (AR ) (Musculoskeletal/Connective); Rare multisystem ciliopathy disorders (AR ) (Congenital); Neurological ciliopathies (AR ) (Nervous); Fetal anomalies (AR ) (Congenital)	4
CISD2	LoF	Wolfram syndrome 2 (604928) (AR)	Severe Paediatric Disorders (AR ) (-); Undiagnosed metabolic disorders (AR ) (Endocrine/Metabolic); Optic neuropathy (AR ) (Eye); Monogenic hearing loss (AR ) (Ear); Diabetes with additional phenotypes suggestive of a monogenic aetiology (AR ) (Endocrine/Metabolic); DDG2P (AR ) (Congenital)	4
CIT	LoF	Microcephaly 17, primary, autosomal recessive (617090) (AR)	Severe Paediatric Disorders (AR ) (-); Severe microcephaly (AR ) (Nervous); Fetal anomalies (AR ) (Congenital)	2
CKAP2L	LoF	Filippi syndrome (272440) (AR)	Limb disorders (AR ) (Musculoskeletal/Connective); Severe Paediatric Disorders (AR ) (-); Severe microcephaly (AR ) (Nervous); Fetal anomalies (AR ) (Congenital)	3
CLCN1	LoF	Myotonia congenita, dominant (160800) (AD);Myotonia congenita, recessive (255700) (AR);Myotonia levior (160800) (AD)	Skeletal Muscle Channelopathies (AD ) (Musculoskeletal/Connective)	1
CLCN2	LoF+GoF	{Epilepsy, idiopathic generalized, susceptibility to, 11} (607628) (AD);{Epilepsy, juvenile absence, susceptibility to, 2} (607628) (AD);{Epilepsy, juvenile myoclonic, susceptibility to, 8} (607628) (AD);Hyperaldosteronism, familial, type II (605635) (AD);Leukoencephalopathy with ataxia (615651) (AR)	Severe Paediatric Disorders (AD_GOF ) (-); White matter disorders and cerebral calcification - narrow panel (AR ) (Nervous)	1
CLCN3	LoF+GoF	Neurodevelopmental disorder with hypotonia and brain abnormalities (619512) (AD);Neurodevelopmental disorder with seizures and brain abnormalities (619517) (AR)	DDG2P (AD ) (Congenital); Early onset or syndromic epilepsy (AD ) (Nervous)	2
CLCN4	LoF	Raynaud-Claes syndrome (300114) (XLD)	DDG2P (XLD ) (Congenital); Severe Paediatric Disorders (XLD ) (-); Intellectual disability - microarray and sequencing (XLD ) (Nervous); Fetal anomalies (XLD ) (Congenital); Early onset or syndromic epilepsy (XLD ) (Nervous)	2
CLCN5	LoF	Dent disease 1 (300009) (XLR);Hypophosphatemic rickets (300554) (XLR);Nephrolithiasis, type I (310468) (XLR);Proteinuria, low molecular weight, with hypercalciuric nephrocalcinosis (308990) (XLR)	Skeletal dysplasia (XLR ) (Musculoskeletal/Connective); Unexplained young onset end-stage renal disease (XLR ) (Genitourinary); Unexplained kidney failure in young people (XLR ) (Genitourinary); Severe Paediatric Disorders (XLR ) (-); Proteinuric renal disease (XLR ) (Genitourinary); Nephrocalcinosis or nephrolithiasis (XLR ) (Genitourinary)	2
CLCN6	GoF	Ceroid lipofuscinosis, neuronal, 15 (619173) (AD)	Neuronal ceroid lipofuscinosis (AD_GOF ) (Nervous); DDG2P (AD_GOF ) (Congenital)	2
CLCN7	LoF+GoF	Hypopigmentation, organomegaly, and delayed myelination and development (618541) (AD);Osteopetrosis, autosomal dominant 2 (166600) (AD);Osteopetrosis, autosomal recessive 4 (611490) (AR)	Fetal anomalies (AD_GOF ) (Congenital); Skeletal dysplasia (AD_GOF ) (Musculoskeletal/Connective); Severe Paediatric Disorders (AD_GOF ) (-); COVID-19 research (AR ) (Blood/Immune)	3
CLCNKB	LoF	Bartter syndrome, type 3 (607364) (AR);Bartter syndrome, type 4b, digenic (613090) (DR)	DDG2P (AR ) (Congenital); Nephrocalcinosis or nephrolithiasis (AD ) (Genitourinary)	2
CLDN1	LoF	Ichthyosis, leukocyte vacuoles, alopecia, and sclerosing cholangitis (607626) (AR)	Ichthyosis and erythrokeratoderma (AR ) (Skin); Severe Paediatric Disorders (AR ) (-); Neonatal cholestasis (AR ) (Digestive)	2
CLDN10	LoF	HELIX syndrome (617671) (AR)	Renal tubulopathies (AR ) (Genitourinary)	1
CLDN11	LoF	Leukodystrophy, hypomyelinating, 22 (619328) (AD)	White matter disorders and cerebral calcification - narrow panel (AD ) (Nervous)	1
CLDN14	LoF	Deafness, autosomal recessive 29 (614035) (AR)	Severe Paediatric Disorders (AR ) (-); Monogenic hearing loss (AR ) (Ear)	1
CLDN16	LoF	Hypomagnesemia 3, renal (248250) (AR)	Severe Paediatric Disorders (AR ) (-); Undiagnosed metabolic disorders (AR ) (Endocrine/Metabolic); Nephrocalcinosis or nephrolithiasis (AR ) (Genitourinary)	2
CLDN19	LoF	Hypomagnesemia 5, renal, with ocular involvement (248190) (AR)	Severe Paediatric Disorders (AR ) (-); Undiagnosed metabolic disorders (AR ) (Endocrine/Metabolic); Structural eye disease (AR ) (Eye); Nephrocalcinosis or nephrolithiasis (AR ) (Genitourinary); DDG2P (AR ) (Congenital)	4
CLDN5	LoF	-	White matter disorders and cerebral calcification - narrow panel (AD ) (Nervous)	1
CLDN9	LoF	Deafness, autosomal recessive 116 (619093) (AR)	Monogenic hearing loss (AR ) (Ear)	1
CLMP	LoF	Congenital short bowel syndrome (615237) (AR)	Gastrointestinal neuromuscular disorders (AR ) (Digestive); DDG2P (AR ) (Congenital)	2
CLN3	LoF	Ceroid lipofuscinosis, neuronal, 3 (204200) (AR)	Severe Paediatric Disorders (AR ) (-); Retinal disorders (AR ) (Eye); Neuronal ceroid lipofuscinosis (AR ) (Nervous); Lysosomal storage disorder (AR ) (Endocrine/Metabolic); DDG2P (AR ) (Congenital)	4
CLN5	LoF	Ceroid lipofuscinosis, neuronal, 5 (256731) (AR)	Severe Paediatric Disorders (AR ) (-); Retinal disorders (AR ) (Eye); Lysosomal storage disorder (AR ) (Endocrine/Metabolic); DDG2P (AR ) (Congenital); Ataxia and cerebellar anomalies - narrow panel (AR ) (Nervous)	4
CLN6	LoF	Ceroid lipofuscinosis, neuronal, 6A (601780) (AR);Ceroid lipofuscinosis, neuronal, 6B (Kufs type) (204300) (AR)	Severe Paediatric Disorders (AR ) (-); Retinal disorders (AR ) (Eye); Lysosomal storage disorder (AR ) (Endocrine/Metabolic); DDG2P (AR ) (Congenital); Ataxia and cerebellar anomalies - narrow panel (AR ) (Nervous)	4
CLN8	LoF	Ceroid lipofuscinosis, neuronal, 8 (600143) (AR);Ceroid lipofuscinosis, neuronal, 8, Northern epilepsy variant (610003) (AR)	Severe Paediatric Disorders (AR ) (-); Retinal disorders (AR ) (Eye); Neuronal ceroid lipofuscinosis (AR ) (Nervous); Lysosomal storage disorder (AR ) (Endocrine/Metabolic); DDG2P (AR ) (Congenital)	4
CLP1	LoF	Pontocerebellar hypoplasia, type 10 (615803) (AR)	Severe Paediatric Disorders (AR ) (-); Fetal anomalies (AR ) (Congenital); Ataxia and cerebellar anomalies - narrow panel (AR ) (Nervous)	2
CLPB	LoF	3-methylglutaconic aciduria, type VIIA, autosomal dominant (619835) (AD);3-methylglutaconic aciduria, type VIIB, autosomal recessive (616271) (AR);Neutropenia, severe congenital, 9, autosomal dominant (619813) (AD)	Fetal anomalies (AD ) (Congenital); Undiagnosed metabolic disorders (AD ) (Endocrine/Metabolic); Severe Paediatric Disorders (AR ) (-); Primary immunodeficiency or monogenic inflammatory bowel disease (AD ) (Blood/Immune); Possible mitochondrial disorder - nuclear genes (AD ) (Endocrine/Metabolic); Early onset or syndromic epilepsy (AD ) (Nervous); Cytopenia - NOT Fanconi anaemia (AD ) (Blood/Imm…	4
CLPP	LoF	Perrault syndrome 3 (614129) (AR)	Severe Paediatric Disorders (AR ) (-); White matter disorders and cerebral calcification - narrow panel (AR ) (Nervous); Undiagnosed metabolic disorders (AR ) (Endocrine/Metabolic); Primary ovarian insufficiency (AR ) (Endocrine/Metabolic); Possible mitochondrial disorder - nuclear genes (AR ) (Endocrine/Metabolic); Monogenic hearing loss (AR ) (Ear); DDG2P (AR ) (Congenital)	4
CLRN1	LoF	Retinitis pigmentosa 61 (614180);Usher syndrome, type 3A (276902) (AR)	Severe Paediatric Disorders (AD ) (-); Retinal disorders (AR ) (Eye); Monogenic hearing loss (AR ) (Ear)	2
CLTC	LoF	Intellectual developmental disorder, autosomal dominant 56 (617854) (AD)	DDG2P (AD ) (Congenital); Severe Paediatric Disorders (AD ) (-); Early onset or syndromic epilepsy (AD ) (Nervous)	2
CNBP	LoF	Myotonic dystrophy 2 (602668) (AD)	Severe Paediatric Disorders (AD ) (-); Other rare neuromuscular disorders (AD ) (Musculoskeletal/Connective)	1
CNGA1	LoF	Retinitis pigmentosa 49 (613756) (AR)	Retinal disorders (AD ) (Eye)	1
CNGA3	LoF	Achromatopsia 2 (216900) (AR)	Retinal disorders (AR ) (Eye)	1
CNGB1	LoF	Retinitis pigmentosa 45 (613767) (AR)	Retinal disorders (AR ) (Eye)	1
CNGB3	LoF	Achromatopsia 3 (262300) (AR)	Severe Paediatric Disorders (AR ) (-); Retinal disorders (AR ) (Eye)	1
CNKSR2	LoF	Intellectual developmental disorder, X-linked syndromic, Houge type (301008) (XL)	DDG2P (XLR ) (Congenital); Severe Paediatric Disorders (XLR ) (-); Intellectual disability - microarray and sequencing (XLR ) (Nervous); Early onset or syndromic epilepsy (XLR ) (Nervous)	2
CNNM2	LoF	Hypomagnesemia 6, renal (613882) (AD);Hypomagnesemia, seizures, and impaired intellectual development 1 (616418) (AD, AR)	Severe Paediatric Disorders (AD ) (-); Undiagnosed metabolic disorders (AD ) (Endocrine/Metabolic); Renal tubulopathies (AD ) (Genitourinary); Early onset or syndromic epilepsy (AD ) (Nervous); DDG2P (AD ) (Congenital)	4
CNNM4	LoF	Jalili syndrome (217080) (AR)	Amelogenesis imperfecta (AR ) (Musculoskeletal/Connective); Retinal disorders (AR ) (Eye)	2
CNOT1	LoF	Holoprosencephaly 12, with or without pancreatic agenesis (618500) (AD);Vissers-Bodmer syndrome (619033) (AD)	Fetal anomalies (AD ) (Congenital); Severe Paediatric Disorders (AD ) (-); Holoprosencephaly - NOT chromosomal (AD ) (Nervous)	2
CNOT2	LoF	Intellectual developmental disorder with nasal speech, dysmorphic facies, and variable skeletal anomalies (618608) (AD)	Intellectual disability - microarray and sequencing (AD ) (Nervous)	1
CNOT3	LoF	Intellectual developmental disorder with speech delay, autism, and dysmorphic facies (618672) (AD)	Severe Paediatric Disorders (AD ) (-); Intellectual disability - microarray and sequencing (AD ) (Nervous); Fetal anomalies (AD ) (Congenital)	2
CNPY3	LoF	Developmental and epileptic encephalopathy 60 (617929) (AR)	Severe Paediatric Disorders (AR ) (-); Early onset or syndromic epilepsy (AR ) (Nervous); DDG2P (AR ) (Congenital)	2
CNTNAP1	LoF	Hypomyelinating neuropathy, congenital, 3 (618186) (AR);Lethal congenital contracture syndrome 7 (616286) (AR)	Severe Paediatric Disorders (AR ) (-); White matter disorders and cerebral calcification - narrow panel (AR ) (Nervous); Fetal anomalies (AR ) (Congenital); Arthrogryposis (AR ) (Musculoskeletal/Connective)	3
CNTNAP2	LoF	{Autism susceptibility 15} (612100);Pitt-Hopkins like syndrome 1 (610042) (AR)	Severe Paediatric Disorders (AD ) (-); Fetal anomalies (AR ) (Congenital); Early onset or syndromic epilepsy (AR ) (Nervous)	2
COA5	LoF	?Mitochondrial complex IV, deficiency, nuclear type 9 (616500) (AR)	Paediatric or syndromic cardiomyopathy (AR ) (Circulatory)	1
COA6	LoF	Mitochondrial complex IV deficiency, nuclear type 13 (616501) (AR)	Severe Paediatric Disorders (AR ) (-); Paediatric or syndromic cardiomyopathy (AR ) (Circulatory); Mitochondrial disorder with complex IV deficiency (AR ) (Endocrine/Metabolic); Likely inborn error of metabolism - targeted testing not possible (AR ) (Endocrine/Metabolic)	2
COA7	LoF	Spinocerebellar ataxia, autosomal recessive, with axonal neuropathy 3 (618387) (AR)	Severe Paediatric Disorders (AR ) (-); White matter disorders and cerebral calcification - narrow panel (AR ) (Nervous); Mitochondrial disorder with complex IV deficiency (AR ) (Endocrine/Metabolic); Likely inborn error of metabolism - targeted testing not possible (AR ) (Endocrine/Metabolic)	2
COA8	LoF	Mitochondrial complex IV deficiency, nuclear type 17 (619061) (AR)	Severe Paediatric Disorders (AR ) (-); White matter disorders and cerebral calcification - narrow panel (AR ) (Nervous); Undiagnosed metabolic disorders (AR ) (Endocrine/Metabolic); Mitochondrial disorder with complex IV deficiency (AR ) (Endocrine/Metabolic); DDG2P (AR ) (Congenital)	3
COASY	LoF	Neurodegeneration with brain iron accumulation 6 (615643) (AR);Pontocerebellar hypoplasia, type 12 (618266) (AR)	Severe Paediatric Disorders (AR ) (-); Fetal anomalies (AR ) (Congenital); Early onset dystonia (AR ) (Nervous)	2
COCH	LoF	?Deafness, autosomal recessive 110 (618094) (AR);Deafness, autosomal dominant 9 (601369) (AD)	Severe Paediatric Disorders (AD ) (-); Familial Meniere Disease (AD ) (Ear)	1
COG1	LoF	Congenital disorder of glycosylation, type IIg (611209) (AR)	Skeletal dysplasia (AR ) (Musculoskeletal/Connective); Severe Paediatric Disorders (AR ) (-); Intellectual disability - microarray and sequencing (AR ) (Nervous); Fetal anomalies (AR ) (Congenital); Congenital disorders of glycosylation (AR ) (Endocrine/Metabolic)	4
COG4	LoF	Congenital disorder of glycosylation, type IIj (613489) (AR);Saul-Wilson syndrome (618150) (AD)	Growth failure in early childhood (AD ) (Congenital); Skeletal dysplasia (AD ) (Musculoskeletal/Connective); Severe Paediatric Disorders (AD ) (-); Intellectual disability - microarray and sequencing (AR ) (Nervous); Congenital disorders of glycosylation (AR ) (Endocrine/Metabolic); Bilateral congenital or childhood onset cataracts (AD ) (Eye)	5
COG5	LoF	Congenital disorder of glycosylation, type IIi (613612) (AR)	Severe Paediatric Disorders (AR ) (-); Intellectual disability - microarray and sequencing (AR ) (Nervous); Fetal anomalies (AR ) (Congenital); Congenital disorders of glycosylation (AR ) (Endocrine/Metabolic)	3
COG6	LoF	Congenital disorder of glycosylation, type IIl (614576) (AR);Shaheen syndrome (615328) (AR)	Severe Paediatric Disorders (AR ) (-); Intellectual disability - microarray and sequencing (AR ) (Nervous); Fetal anomalies (AR ) (Congenital); Congenital disorders of glycosylation (AR ) (Endocrine/Metabolic)	3
COG7	LoF	Congenital disorder of glycosylation, type IIe (608779) (AR)	Fetal anomalies (AR ) (Congenital); Severe Paediatric Disorders (AR ) (-); Neonatal cholestasis (AR ) (Digestive); Early onset or syndromic epilepsy (AR ) (Nervous); Congenital disorders of glycosylation (AR ) (Endocrine/Metabolic)	4
COG8	LoF	Congenital disorder of glycosylation, type IIh (611182)	Severe Paediatric Disorders (AR ) (-); Intellectual disability - microarray and sequencing (AR ) (Nervous); Fetal anomalies (AR ) (Congenital); Congenital disorders of glycosylation (AR ) (Endocrine/Metabolic)	3
COL10A1	LoF+GoF	Metaphyseal chondrodysplasia, Schmid type (156500) (AD)	Skeletal dysplasia (AD ) (Musculoskeletal/Connective); Severe Paediatric Disorders (AD ) (-); Fetal anomalies (AD ) (Congenital)	2
COL11A1	LoF	{Lumbar disc herniation, susceptibility to} (603932);Deafness, autosomal dominant 37 (618533) (AD);Fibrochondrogenesis 1 (228520) (AR);Marshall syndrome (154780) (AD);Stickler syndrome, type II (604841) (AD);{Lumbar disc herniation, susceptibility to} (603932);Deafness, autosomal dominant 37 (618533) (AD);Fibrochondrogenesis 1 (228520) (AR);Marshall syndrome (154780) (AD);Stickler syndrome, type …	Fetal anomalies (AD ) (Congenital); Stickler syndrome (AD ) (Musculoskeletal/Connective); Severe Paediatric Disorders (AD ) (-); Retinal disorders (AD ) (Eye); Monogenic hearing loss (AD ) (Ear)	4
COL11A2	LoF	Deafness, autosomal dominant 13 (601868) (AD);Deafness, autosomal recessive 53 (609706) (AR);Fibrochondrogenesis 2 (614524) (AD, AR);Otospondylomegaepiphyseal dysplasia, autosomal dominant (184840) (AD);Otospondylomegaepiphyseal dysplasia, autosomal recessive (215150) (AR)	Fetal anomalies (AD ) (Congenital); Stickler syndrome (AD ) (Musculoskeletal/Connective); Severe Paediatric Disorders (AD ) (-); Monogenic hearing loss (AD ) (Ear)	3
COL12A1	LoF	?Ullrich congenital muscular dystrophy 2 (616470) (AR);Bethlem myopathy 2 (616471) (AD)	Fetal anomalies (AD ) (Congenital); Severe Paediatric Disorders (AD ) (-); Other rare neuromuscular disorders (AD ) (Musculoskeletal/Connective); Ehlers Danlos syndrome with a likely monogenic cause (AD ) (Musculoskeletal/Connective)	2
COL13A1	LoF	Myasthenic syndrome, congenital, 19 (616720) (AR)	Severe Paediatric Disorders (AR ) (-); Other rare neuromuscular disorders (AR ) (Musculoskeletal/Connective); Fetal anomalies (AR ) (Congenital)	2
COL17A1	LoF	Epidermolysis bullosa, junctional 4, intermediate (619787) (AR);Epithelial recurrent erosion dystrophy (122400) (AD)	Epidermolysis bullosa (AD ) (Skin); Severe Paediatric Disorders (AD ) (-); Corneal dystrophy (AD ) (Eye); Amelogenesis imperfecta (AD ) (Musculoskeletal/Connective)	3
COL18A1	LoF	Glaucoma, primary closed-angle (618880) (AD);Knobloch syndrome, type 1 (267750) (AR)	Severe Paediatric Disorders (AR ) (-); Fetal anomalies (AR ) (Congenital); Early onset or syndromic epilepsy (AR ) (Nervous); Bilateral congenital or childhood onset cataracts (AR ) (Eye)	3
COL1A1	LoF	{Bone mineral density variation QTL, osteoporosis} (166710) (AD);Caffey disease (114000) (AD);Combined osteogenesis imperfecta and Ehlers-Danlos syndrome 1 (619115) (AD);Ehlers-Danlos syndrome, arthrochalasia type, 1 (130060) (AD);Osteogenesis imperfecta, type I (166200) (AD);Osteogenesis imperfecta, type II (166210) (AD);Osteogenesis imperfecta, type III (259420) (AD);Osteogenesis imperfecta, ty…	Fetal anomalies (AD ) (Congenital); Thoracic aortic aneurysm or dissection (AD ) (Circulatory); Skeletal dysplasia (AD ) (Musculoskeletal/Connective); Severe Paediatric Disorders (AD ) (-); Inherited bleeding disorders (AD ) (Blood/Immune)	4
COL1A2	LoF+GoF	{Osteoporosis, postmenopausal} (166710) (AD);Combined osteogenesis imperfecta and Ehlers-Danlos syndrome 2 (619120) (AD);Ehlers-Danlos syndrome, arthrochalasia type, 2 (617821) (AD);Ehlers-Danlos syndrome, cardiac valvular type (225320) (AR);Osteogenesis imperfecta, type II (166210) (AD);Osteogenesis imperfecta, type III (259420) (AD);Osteogenesis imperfecta, type IV (166220) (AD);{Osteoporosis, …	Fetal anomalies (AD ) (Congenital); Thoracic aortic aneurysm or dissection (AD ) (Circulatory); Skeletal dysplasia (AD ) (Musculoskeletal/Connective); Severe Paediatric Disorders (AD ) (-)	3
COL25A1	LoF	Fibrosis of extraocular muscles, congenital, 5 (616219) (AR)	Arthrogryposis (AR ) (Musculoskeletal/Connective); DDG2P (AR ) (Congenital)	2
COL27A1	LoF	Steel syndrome (615155) (AR)	DDG2P (AR ) (Congenital)	1
COL2A1	LoF	?Epiphyseal dysplasia, multiple, with myopia and deafness (132450) (AD);?Vitreoretinopathy with phalangeal epiphyseal dysplasia (619248) (AD);Achondrogenesis, type II or hypochondrogenesis (200610) (AD);Avascular necrosis of the femoral head (608805) (AD);Czech dysplasia (609162) (AD);Kniest dysplasia (156550) (AD);Legg-Calve-Perthes disease (150600) (AD);Osteoarthritis with mild chondrodysplasia…	Fetal anomalies (AD ) (Congenital); Severe Paediatric Disorders (AD ) (-); Monogenic hearing loss (AD ) (Ear); Limb disorders (AD ) (Musculoskeletal/Connective); Bilateral congenital or childhood onset cataracts (AD ) (Eye)	4
COL3A1	LoF	Ehlers-Danlos syndrome, vascular type (130050) (AD);Polymicrogyria with or without vascular-type EDS (618343) (AR)	Cerebral vascular malformations (AD ) (Congenital); Thoracic aortic aneurysm or dissection GMS (AD ) (Circulatory); Severe Paediatric Disorders (AD ) (-); Pneumothorax - familial (AD ) (Respiratory); Familial cerebral small vessel disease (AD ) (Nervous); Ehlers Danlos syndrome with a likely monogenic cause (AD ) (Musculoskeletal/Connective); Bleeding and platelet disorders (AD ) (Blood/Immune)	6
COL4A1	LoF	?Retinal arteries, tortuosity of (180000) (AD);{Hemorrhage, intracerebral, susceptibility to} (614519);Angiopathy, hereditary, with nephropathy, aneurysms, and muscle cramps (611773) (AD);Brain small vessel disease with or without ocular anomalies (175780) (AD);Microangiopathy and leukoencephalopathy, pontine, autosomal dominant (618564) (AD)	Fetal anomalies (AD ) (Congenital); Severe Paediatric Disorders (AD ) (-); Hydrocephalus (AD ) (Nervous); Cystic kidney disease (AD ) (Genitourinary); Bilateral congenital or childhood onset cataracts (AD ) (Eye)	4
COL4A2	LoF	{Hemorrhage, intracerebral, susceptibility to} (614519);Brain small vessel disease 2 (614483) (AD)	Fetal anomalies (AD ) (Congenital); Severe Paediatric Disorders (AD ) (-); Familial cerebral small vessel disease (AD ) (Nervous)	2
COL4A3	LoF	Alport syndrome 3A, autosomal dominant (104200) (AD);Alport syndrome 3B, autosomal recessive (620536);Hematuria, benign familial, 2 (620320) (AD)	DDG2P (AD ) (Congenital); Unexplained kidney failure in young people (AD ) (Genitourinary); Severe Paediatric Disorders (AD ) (-)	2
COL4A4	LoF	Alport syndrome 2, autosomal recessive (203780) (AR);Hematuria, familial benign, 1 (141200) (AD)	Severe Paediatric Disorders (AD ) (-); Unexplained kidney failure in young people (AD ) (Genitourinary); DDG2P (AR ) (Congenital)	2
COL4A5	LoF	Alport syndrome 1, X-linked (301050) (XLD)	Severe Paediatric Disorders (XLD ) (-); Unexplained young onset end-stage renal disease (XLD ) (Genitourinary); Unexplained kidney failure in young people (XLD ) (Genitourinary); Proteinuric renal disease (XLD ) (Genitourinary); Monogenic hearing loss (XLD ) (Ear); Haematuria (XLD ) (Genitourinary)	2
COL5A1	LoF	Ehlers-Danlos syndrome, classic type, 1 (130000) (AD);Fibromuscular dysplasia, multifocal (619329) (AD)	Ehlers Danlos syndrome with a likely monogenic cause (AD ) (Musculoskeletal/Connective); Thoracic aortic aneurysm or dissection GMS (AD ) (Circulatory); Severe Paediatric Disorders (AD ) (-); Inherited bleeding disorders (AD ) (Blood/Immune)	3
COL5A2	LoF	Ehlers-Danlos syndrome, classic type, 2 (130010) (AD)	Ehlers Danlos syndrome with a likely monogenic cause (AD ) (Musculoskeletal/Connective); Thoracic aortic aneurysm or dissection GMS (AD ) (Circulatory); Severe Paediatric Disorders (AD ) (-); Inherited bleeding disorders (AD ) (Blood/Immune)	3
COL6A1	LoF	Bethlem myopathy 1A (158810) (AD);Ullrich congenital muscular dystrophy 1A (254090) (AD, AR)	DDG2P (AD ) (Congenital); Severe Paediatric Disorders (AD ) (-); Other rare neuromuscular disorders (AD ) (Musculoskeletal/Connective); Ehlers Danlos syndrome with a likely monogenic cause (AD ) (Musculoskeletal/Connective)	2
COL6A2	LoF	?Myosclerosis, congenital (255600) (AR);Bethlem myopathy 1B (620725) (AD, AR);Ullrich congenital muscular dystrophy 1B (620727) (AD, AR)	DDG2P (AD ) (Congenital); Severe Paediatric Disorders (AD ) (-); Other rare neuromuscular disorders (AD ) (Musculoskeletal/Connective); Ehlers Danlos syndrome with a likely monogenic cause (AD ) (Musculoskeletal/Connective)	2
COL6A3	LoF	Bethlem myopathy 1C (620726) (AD, AR);Dystonia 27 (616411) (AR);Ullrich congenital muscular dystrophy 1C (620728) (AD, AR)	Fetal anomalies (AD ) (Congenital); Severe Paediatric Disorders (AD ) (-); Other rare neuromuscular disorders (AD ) (Musculoskeletal/Connective); Ehlers Danlos syndrome with a likely monogenic cause (AD ) (Musculoskeletal/Connective)	2
COL7A1	LoF	Epidermolysis bullosa dystrophica inversa (226600) (AR);Epidermolysis bullosa dystrophica, autosomal dominant (131750) (AD);Epidermolysis bullosa dystrophica, autosomal recessive (226600) (AR);Epidermolysis bullosa dystrophica, Bart type (132000) (AD);Epidermolysis bullosa dystrophica, localisata variant (226600) (AR);Epidermolysis bullosa pruriginosa (604129) (AD, AR);Epidermolysis bullosa, pret…	Epidermolysis bullosa (AD ) (Skin); Severe Paediatric Disorders (AD ) (-); Primary immunodeficiency or monogenic inflammatory bowel disease (AR ) (Blood/Immune)	2
COL8A2	LoF	Corneal dystrophy, Fuchs endothelial, 1 (136800) (AD);Corneal dystrophy, posterior polymorphous 2 (609140) (AD)	Corneal abnormalities (AD ) (Eye)	1
COL9A1	LoF	?Epiphyseal dysplasia, multiple, 6 (614135) (AD);Stickler syndrome, type IV (614134) (AR)	Fetal anomalies (AD ) (Congenital); Skeletal dysplasia (AD ) (Musculoskeletal/Connective); Severe Paediatric Disorders (AD ) (-); Retinal disorders (AR ) (Eye); Monogenic hearing loss (AR ) (Ear)	4
COL9A2	LoF	?Stickler syndrome, type V (614284) (AR);Epiphyseal dysplasia, multiple, 2 (600204) (AD)	Fetal anomalies (AD ) (Congenital); Severe Paediatric Disorders (AD ) (-); Retinal disorders (AR ) (Eye); Multiple Epiphyseal Dysplasia (AD ) (Musculoskeletal/Connective); Monogenic hearing loss (AR ) (Ear)	4
COL9A3	LoF	{Intervertebral disc disease, susceptibility to} (603932);Epiphyseal dysplasia, multiple, 3, with or without myopathy (600969) (AD);Stickler syndrome, type VI (620022) (AR);{Intervertebral disc disease, susceptibility to} (603932);Epiphyseal dysplasia, multiple, 3, with or without myopathy (600969) (AD);Stickler syndrome, type VI (620022) (AR);{Intervertebral disc disease, susceptibility to} (603…	DDG2P (AD ) (Congenital); Severe Paediatric Disorders (AD ) (-); Retinal disorders (AR ) (Eye); Multiple Epiphyseal Dysplasia (AD ) (Musculoskeletal/Connective)	3
COLEC10	LoF	3MC syndrome 3 (248340) (AR)	Clefting (AR ) (Musculoskeletal/Connective); Severe Paediatric Disorders (AR ) (-); Fetal anomalies (AR ) (Congenital)	2
COLEC11	LoF	3MC syndrome 2 (265050) (AR)	Skeletal dysplasia (AR ) (Musculoskeletal/Connective); Severe Paediatric Disorders (AR ) (-); Intellectual disability - microarray and sequencing (AR ) (Nervous); Fetal anomalies (AR ) (Congenital)	3
COLGALT1	LoF	Brain small vessel disease 3 (618360) (AR)	White matter disorders and cerebral calcification - narrow panel (AR ) (Nervous)	1
COLQ	LoF	Myasthenic syndrome, congenital, 5 (603034) (AR)	Severe Paediatric Disorders (AR ) (-); Other rare neuromuscular disorders (AR ) (Musculoskeletal/Connective); Fetal anomalies (AR ) (Congenital)	2
COMP	LoF	Carpal tunnel syndrome 2 (619161) (AD);Epiphyseal dysplasia, multiple, 1 (132400) (AD);Pseudoachondroplasia (177170) (AD)	Multiple Epiphyseal Dysplasia (AD ) (Musculoskeletal/Connective); Severe Paediatric Disorders (AD ) (-)	1
COPA	LoF	{Autoimmune interstitial lung, joint, and kidney disease} (616414) (AD)	Severe Paediatric Disorders (AD ) (-); COVID-19 research (AD ) (Blood/Immune)	1
COPB2	LoF	?Microcephaly 19, primary, autosomal recessive (617800) (AR);Osteoporosis, childhood- or juvenile-onset, with developmental delay (619884) (AD)	DDG2P (AD ) (Congenital); Osteogenesis imperfecta (AD ) (Musculoskeletal/Connective); Intellectual disability - microarray and sequencing (AD ) (Nervous)	3
COQ2	LoF	{Multiple system atrophy, susceptibility to} (146500) (AD, AR);Coenzyme Q10 deficiency, primary, 1 (607426) (AR)	Severe Paediatric Disorders (AR ) (-); White matter disorders and cerebral calcification - narrow panel (AR ) (Nervous); Unexplained kidney failure in young people (AR ) (Genitourinary); Undiagnosed metabolic disorders (AR ) (Endocrine/Metabolic); Retinal disorders (AR ) (Eye); Possible mitochondrial disorder - nuclear genes (AR ) (Endocrine/Metabolic); DDG2P (AR ) (Congenital)	5
COQ4	LoF	Coenzyme Q10 deficiency, primary, 7 (616276) (AR);Spastic ataxia 10, autosomal recessive (620666) (AR)	Severe Paediatric Disorders (AR ) (-); Undiagnosed metabolic disorders (AR ) (Endocrine/Metabolic); Rhabdomyolysis and metabolic muscle disorders (AR ) (Musculoskeletal/Connective); Possible mitochondrial disorder - nuclear genes (AR ) (Endocrine/Metabolic); Fetal anomalies (AR ) (Congenital); Ataxia and cerebellar anomalies - narrow panel (AR ) (Nervous)	4
COQ6	LoF	Coenzyme Q10 deficiency, primary, 6 (614650) (AR)	Severe Paediatric Disorders (AR ) (-); Unexplained kidney failure in young people (AR ) (Genitourinary); Undiagnosed metabolic disorders (AR ) (Endocrine/Metabolic); Possible mitochondrial disorder - nuclear genes (AR ) (Endocrine/Metabolic)	2
COQ7	LoF	Coenzyme Q10 deficiency, primary, 8 (616733) (AR);Neuronopathy, distal hereditary motor, autosomal recessive 9 (620402) (AR)	Possible mitochondrial disorder - nuclear genes (AR ) (Endocrine/Metabolic); Undiagnosed metabolic disorders (AR ) (Endocrine/Metabolic); Fetal anomalies (AR ) (Congenital)	2
COQ8A	LoF	Coenzyme Q10 deficiency, primary, 4 (612016) (AR)	Severe Paediatric Disorders (AR ) (-); White matter disorders and cerebral calcification - narrow panel (AR ) (Nervous); Undiagnosed metabolic disorders (AR ) (Endocrine/Metabolic); Rhabdomyolysis and metabolic muscle disorders (AR ) (Musculoskeletal/Connective); Possible mitochondrial disorder - nuclear genes (AR ) (Endocrine/Metabolic); DDG2P (AR ) (Congenital)	4
COQ8B	LoF	Nephrotic syndrome, type 9 (615573) (AR)	Severe Paediatric Disorders (AR ) (-); Unexplained kidney failure in young people (AR ) (Genitourinary); Undiagnosed metabolic disorders (AR ) (Endocrine/Metabolic); Possible mitochondrial disorder - nuclear genes (AR ) (Endocrine/Metabolic)	2
COQ9	LoF	Coenzyme Q10 deficiency, primary, 5 (614654) (AR)	Severe Paediatric Disorders (AR ) (-); Undiagnosed metabolic disorders (AR ) (Endocrine/Metabolic); Possible mitochondrial disorder - nuclear genes (AR ) (Endocrine/Metabolic); Fetal anomalies (AR ) (Congenital); Early onset or syndromic epilepsy (AR ) (Nervous)	3
CORO1A	LoF	Immunodeficiency 8 (615401) (AR)	Severe Paediatric Disorders (AR ) (-); COVID-19 research (AR ) (Blood/Immune)	1
COX10	LoF	Mitochondrial complex IV deficiency, nuclear type 3 (619046) (AR)	DDG2P (AR ) (Congenital); White matter disorders and cerebral calcification - narrow panel (AR ) (Nervous); Undiagnosed metabolic disorders (AR ) (Endocrine/Metabolic); Severe Paediatric Disorders (AR ) (-); Paediatric or syndromic cardiomyopathy (AR ) (Circulatory); Mitochondrial disorder with complex IV deficiency (AR ) (Endocrine/Metabolic)	4
COX14	LoF	?Mitochondrial complex IV deficiency, nuclear type 10 (619053) (AR)	Mitochondrial disorder with complex IV deficiency (AR ) (Endocrine/Metabolic); Undiagnosed metabolic disorders (AR ) (Endocrine/Metabolic)	1
COX15	LoF	Mitochondrial complex IV deficiency, nuclear type 6 (615119) (AR)	DDG2P (AR ) (Congenital); White matter disorders and cerebral calcification - narrow panel (AR ) (Nervous); Undiagnosed metabolic disorders (AR ) (Endocrine/Metabolic); Severe Paediatric Disorders (AR ) (-); Paediatric or syndromic cardiomyopathy (AR ) (Circulatory); Mitochondrial disorder with complex IV deficiency (AR ) (Endocrine/Metabolic)	4
COX16	LoF	Mitochondrial complex IV deficiency, nuclear type 22 (619355) (AR)	DDG2P (AR ) (Congenital)	1
COX20	LoF	Mitochondrial complex IV deficiency, nuclear type 11 (619054) (AR)	Severe Paediatric Disorders (AR ) (-); Undiagnosed metabolic disorders (AR ) (Endocrine/Metabolic); Mitochondrial disorder with complex IV deficiency (AR ) (Endocrine/Metabolic); Ataxia and cerebellar anomalies - narrow panel (AR ) (Nervous)	2
COX4I1	LoF	Mitochondrial complex IV deficiency, nuclear type 16 (619060) (AR)	Mitochondrial disorder with complex IV deficiency (AR ) (Endocrine/Metabolic)	1
COX6A1	LoF	Charcot-Marie-Tooth disease, recessive intermediate D (616039) (AR)	Severe Paediatric Disorders (AR ) (-); Undiagnosed metabolic disorders (AR ) (Endocrine/Metabolic); Mitochondrial disorder with complex IV deficiency (AR ) (Endocrine/Metabolic); Hereditary neuropathy (AR ) (Nervous)	2
COX6A2	LoF	Mitochondrial complex IV deficiency, nuclear type 18 (619062) (AR)	Congenital myopathy (AR ) (Musculoskeletal/Connective); Mitochondrial disorder with complex IV deficiency (AR ) (Endocrine/Metabolic)	2
COX6B1	LoF	Mitochondrial complex IV deficiency, nuclear type 7 (619051) (AR)	Severe Paediatric Disorders (AR ) (-); Undiagnosed metabolic disorders (AR ) (Endocrine/Metabolic); Mitochondrial disorder with complex IV deficiency (AR ) (Endocrine/Metabolic); DDG2P (AR ) (Congenital)	2
COX7B	LoF	Linear skin defects with multiple congenital anomalies 2 (300887) (XLD)	DDG2P (XLD ) (Congenital); Undiagnosed metabolic disorders (XLD ) (Endocrine/Metabolic); Severe Paediatric Disorders (XLD ) (-); Possible mitochondrial disorder - nuclear genes (XLD ) (Endocrine/Metabolic); Pigmentary skin disorders (XLD ) (Skin); Mitochondrial disorders (XLD ) (Endocrine/Metabolic); Mitochondrial disorder with complex IV deficiency (XLD ) (Endocrine/Metabolic); Likely inborn err…	3
CP	LoF	Aceruloplasminemia (604290) (AR)	Severe Paediatric Disorders (AR ) (-); Iron metabolism disorders - NOT common HFE mutations (AR ) (Endocrine/Metabolic); Early onset dystonia (AR ) (Nervous)	2
CPAMD8	LoF	Anterior segment dysgenesis 8 (617319) (AR)	Glaucoma developmental (AR ) (Eye); DDG2P (AR ) (Congenital)	2
CPE	LoF	BDV syndrome (619326) (AR)	Intellectual disability - microarray and sequencing (AR ) (Nervous); Severe early-onset obesity (AR ) (Endocrine/Metabolic)	2
CPLANE1	LoF	Joubert syndrome 17 (614615) (AR);Orofaciodigital syndrome VI (277170) (AR)	Clefting (AR ) (Musculoskeletal/Connective); Unexplained young onset end-stage renal disease (AR ) (Genitourinary); Severe Paediatric Disorders (AR ) (-); Rare multisystem ciliopathy disorders (AR ) (Congenital); Ophthalmological ciliopathies (AR ) (Eye); Intellectual disability - microarray and sequencing (AR ) (Nervous); Fetal anomalies (AR ) (Congenital)	5
CPLX1	LoF	Developmental and epileptic encephalopathy 63 (617976) (AR)	Early onset or syndromic epilepsy (AR ) (Nervous)	1
CPOX	LoF	Coproporphyria (121300) (AD, AR);Harderoporphyria (618892) (AR)	Cutaneous photosensitivity with a likely genetic cause (AD ) (Skin); Severe Paediatric Disorders (AD ) (-); Non-acute porphyrias (AD ) (Endocrine/Metabolic); Hereditary neuropathy (AD ) (Nervous)	3
CPS1	LoF	{Pulmonary hypertension, neonatal, susceptibility to} (615371);Carbamoylphosphate synthetase I deficiency (237300) (AR)	Severe Paediatric Disorders (AR ) (-); Intellectual disability - microarray and sequencing (AR ) (Nervous); Hyperammonaemia (AR ) (Endocrine/Metabolic); DDG2P (AR ) (Congenital)	3
CPSF3	LoF	Neurodevelopmental disorder with microcephaly, hypotonia, nystagmus, and seizures (619876) (AR)	DDG2P (AR ) (Congenital)	1
CPT1A	LoF	CPT deficiency, hepatic, type IA (255120) (AR)	Severe Paediatric Disorders (AR ) (-); Hyperammonaemia (AR ) (Endocrine/Metabolic)	1
CPT1C	LoF+GoF	?Spastic paraplegia 73, autosomal dominant (616282) (AD)	Childhood onset hereditary spastic paraplegia (AD ) (Nervous)	1
CPT2	LoF	{Encephalopathy, acute, infection-induced, 4, susceptibility to} (614212) (AD, AR);CPT II deficiency, infantile (600649) (AR);CPT II deficiency, lethal neonatal (608836) (AR);CPT II deficiency, myopathic, stress-induced (255110) (AD, AR)	Severe Paediatric Disorders (AD ) (-); Undiagnosed metabolic disorders (AD ) (Endocrine/Metabolic); Rhabdomyolysis and metabolic muscle disorders (AD ) (Musculoskeletal/Connective); Paediatric or syndromic cardiomyopathy (AD ) (Circulatory); Fetal anomalies (AR ) (Congenital)	4
CR2	LoF	?Immunodeficiency, common variable, 7 (614699) (AR);{Systemic lupus erythematosus, susceptibility to, 9} (610927)	Severe Paediatric Disorders (AR ) (-); COVID-19 research (AR ) (Blood/Immune)	1
CRADD	LoF	Intellectual developmental disorder, autosomal recessive 34, with variant lissencephaly (614499) (AR)	Severe Paediatric Disorders (AR ) (-); Malformations of cortical development (AR ) (Nervous); Fetal anomalies (AR ) (Congenital)	2
CRB1	LoF	Leber congenital amaurosis 8 (613835) (AR);Pigmented paravenous chorioretinal atrophy (172870) (AD);Retinitis pigmentosa-12 (600105) (AR)	Severe Paediatric Disorders (AD ) (-); Retinal disorders (AR ) (Eye); DDG2P (AR ) (Congenital)	2
CRB2	LoF	Focal segmental glomerulosclerosis 9 (616220) (AR);Ventriculomegaly with cystic kidney disease (219730) (AR)	Severe Paediatric Disorders (AR ) (-); Unexplained young onset end-stage renal disease (AR ) (Genitourinary); Rare multisystem ciliopathy disorders (AR ) (Congenital); Hydrocephalus (AR ) (Nervous); Fetal anomalies (AR ) (Congenital)	3
CREB3L1	LoF	Osteogenesis imperfecta, type XVI (616229) (AR)	Skeletal dysplasia (AR ) (Musculoskeletal/Connective); Fetal anomalies (AR ) (Congenital)	2
CREB3L3	LoF	Hypertriglyceridemia 2 (619324) (AD)	Severe hypertriglyceridaemia (AD ) (Endocrine/Metabolic)	1
CREBBP	LoF	Menke-Hennekam syndrome 1 (618332) (AD);Rubinstein-Taybi syndrome 1 (180849) (AD)	IUGR and IGF abnormalities (AD ) (Congenital); Skeletal dysplasia (AD ) (Musculoskeletal/Connective); Severe Paediatric Disorders (AD ) (-); Severe microcephaly (AD ) (Nervous); Glaucoma developmental (AD ) (Eye)	4
CRELD1	LoF	{Atrioventricular septal defect, susceptibility to, 2} (606217) (AD);Atrioventricular septal defect, partial, with heterotaxy syndrome (606217) (AD);Jeffries-Lakhani neurodevelopmental syndrome (620771) (AR)	DDG2P (AD ) (Congenital)	1
CRIM1	LoF	-	Structural eye disease (AD ) (Eye)	1
CRIPT	LoF	Rothmund-Thomson syndrome, type 3 (615789) (AR)	Severe Paediatric Disorders (AR ) (-); IUGR and IGF abnormalities (AR ) (Congenital)	1
CRLF1	LoF	Cold-induced sweating syndrome 1 (272430) (AR)	Severe Paediatric Disorders (AR ) (-); Fetal anomalies (AR ) (Congenital); Arthrogryposis (AR ) (Musculoskeletal/Connective)	2
CRLS1	LoF	Combined oxidative phosphorylation deficiency 57 (620167) (AR);Combined oxidative phosphorylation deficiency 57 (620167) (AR)	Mitochondrial disorders (AR ) (Endocrine/Metabolic); Likely inborn error of metabolism - targeted testing not possible (AR ) (Endocrine/Metabolic)	1
CRPPA	LoF	Muscular dystrophy-dystroglycanopathy (congenital with brain and eye anomalies), type A, 7 (614643) (AR);Muscular dystrophy-dystroglycanopathy (limb-girdle), type C, 7 (616052) (AR)	Severe Paediatric Disorders (AR ) (-); Structural eye disease (AR ) (Eye); Other rare neuromuscular disorders (AR ) (Musculoskeletal/Connective); Hydrocephalus (AR ) (Nervous); Fetal anomalies (AR ) (Congenital); Congenital disorders of glycosylation (AR ) (Endocrine/Metabolic)	5
CRTAP	LoF	Osteogenesis imperfecta, type VII (610682) (AR)	Skeletal dysplasia (AR ) (Musculoskeletal/Connective); Severe Paediatric Disorders (AR ) (-); Fetal anomalies (AR ) (Congenital)	2
CRX	LoF	Cone-rod retinal dystrophy-2 (120970) (AD);Leber congenital amaurosis 7 (613829)	DDG2P (AD ) (Congenital); Severe Paediatric Disorders (AD ) (-); Retinal disorders (AD ) (Eye)	2
CRYAA	LoF	Cataract 9, multiple types (604219) (AD, AR)	Fetal anomalies (AD ) (Congenital); Severe Paediatric Disorders (AD ) (-); Bilateral congenital or childhood onset cataracts (AD ) (Eye)	2
CRYAB	LoF	Cardiomyopathy, dilated, 1II (615184) (AD);Cataract 16, multiple types (613763) (AD, AR);Myopathy, myofibrillar, 2 (608810) (AD);Myopathy, myofibrillar, fatal infantile hypertonic, alpha-B crystallin-related (613869) (AR)	Severe Paediatric Disorders (AD ) (-); Distal myopathies (AD ) (Musculoskeletal/Connective); Bilateral congenital or childhood onset cataracts (AD ) (Eye)	2
CRYBA1	LoF	Cataract 10, multiple types (600881) (AD)	Fetal anomalies (AD ) (Congenital); Severe Paediatric Disorders (AD ) (-); Bilateral congenital or childhood onset cataracts (AD ) (Eye)	2
CRYBA4	LoF	Cataract 23 (610425) (AD)	Severe Paediatric Disorders (AD ) (-); Fetal anomalies (AD ) (Congenital); Bilateral congenital or childhood onset cataracts (AD ) (Eye)	2
CRYBB1	LoF	Cataract 17, multiple types (611544) (AD, AR)	Fetal anomalies (AD ) (Congenital); Severe Paediatric Disorders (AD ) (-); Bilateral congenital or childhood onset cataracts (AD ) (Eye)	2
CRYBB2	LoF	Cataract 3, multiple types (601547) (AD)	Fetal anomalies (AD ) (Congenital); Severe Paediatric Disorders (AD ) (-); Bilateral congenital or childhood onset cataracts (AD ) (Eye)	2
CRYBB3	LoF	Cataract 22 (609741) (AD, AR)	Fetal anomalies (AD ) (Congenital); Severe Paediatric Disorders (AD ) (-); Bilateral congenital or childhood onset cataracts (AD ) (Eye)	2
CRYGC	LoF	Cataract 2, multiple types (604307) (AD)	Fetal anomalies (AD ) (Congenital); Severe Paediatric Disorders (AD ) (-); Bilateral congenital or childhood onset cataracts (AD ) (Eye)	2
CRYGD	LoF	Cataract 4, multiple types (115700) (AD)	Severe Paediatric Disorders (AD ) (-); Fetal anomalies (AD ) (Congenital); Bilateral congenital or childhood onset cataracts (AD ) (Eye)	2
CRYGS	LoF	Cataract 20, multiple types (116100) (AD)	Bilateral congenital or childhood onset cataracts (AD ) (Eye)	1
CRYM	LoF	Deafness, autosomal dominant 40 (616357) (AD)	Monogenic hearing loss (AD ) (Ear)	1
CSDE1	LoF	-	Intellectual disability - microarray and sequencing (AD ) (Nervous)	1
CSF1R	LoF	Brain abnormalities, neurodegeneration, and dysosteosclerosis (618476) (AR);Leukoencephalopathy, diffuse hereditary, with spheroids 1 (221820) (AD)	Severe Paediatric Disorders (AD ) (-); Parkinson Disease and Complex Parkinsonism (AD ) (Nervous); Fetal anomalies (AR ) (Congenital)	2
CSF2RA	LoF	Surfactant metabolism dysfunction, pulmonary, 4 (300770)	Severe Paediatric Disorders (PsAR ) (-); Familial pulmonary fibrosis (PsAR ) (Respiratory); COVID-19 research (PsAR ) (Blood/Immune)	2
CSF2RB	LoF	Surfactant metabolism dysfunction, pulmonary, 5 (614370) (AR)	Severe Paediatric Disorders (AR ) (-); Familial pulmonary fibrosis (AR ) (Respiratory); COVID-19 research (AR ) (Blood/Immune)	2
CSF3R	LoF	?Neutrophilia, hereditary (162830) (AD);Neutropenia, severe congenital, 7, autosomal recessive (617014) (AR)	Severe Paediatric Disorders (AR ) (-); Cytopenias and congenital anaemias (AR ) (Blood/Immune); COVID-19 research (AR ) (Blood/Immune)	1
CSGALNACT1	LoF	Skeletal dysplasia, mild, with joint laxity and advanced bone age (618870) (AR)	Skeletal dysplasia (AR ) (Musculoskeletal/Connective); Congenital disorders of glycosylation (AR ) (Endocrine/Metabolic)	2
CSNK1G1	LoF	-	Intellectual disability - microarray and sequencing (AD ) (Nervous)	1
CSNK2A1	LoF	Okur-Chung neurodevelopmental syndrome (617062) (AD);Okur-Chung neurodevelopmental syndrome (617062) (AD)	Fetal anomalies (AD ) (Congenital); Severe Paediatric Disorders (AD ) (-); Malformations of cortical development (AD ) (Nervous)	2
CSNK2B	LoF	Poirier-Bienvenu neurodevelopmental syndrome (618732) (AD)	DDG2P (AD ) (Congenital); Severe Paediatric Disorders (AD ) (-); Early onset or syndromic epilepsy (AD ) (Nervous)	2
CSPP1	LoF	Joubert syndrome 21 (615636) (AR)	Thoracic dystrophies (AR ) (Musculoskeletal/Connective); Unexplained young onset end-stage renal disease (AR ) (Genitourinary); Severe Paediatric Disorders (AR ) (-); Retinal disorders (AR ) (Eye); Rare multisystem ciliopathy disorders (AR ) (Congenital); Intellectual disability - microarray and sequencing (AR ) (Nervous); Fetal anomalies (AR ) (Congenital)	5
CSRP3	LoF	?Cardiomyopathy, dilated, 1M (607482);Cardiomyopathy, hypertrophic, 12 (612124) (AD)	Hypertrophic cardiomyopathy (AD ) (Circulatory)	1
CSTA	LoF	Peeling skin syndrome 4 (607936) (AR)	Peeling skin syndrome (AR ) (Skin); DDG2P (AR ) (Congenital)	2
CSTB	LoF	Epilepsy, progressive myoclonic 1A (Unverricht and Lundborg) (254800) (AR)	DDG2P (AR ) (Congenital); Severe Paediatric Disorders (AR ) (-); Early onset dystonia (AR ) (Nervous)	2
CTBP1	LoF	Hypotonia, ataxia, developmental delay, and tooth enamel defect syndrome (617915) (AD)	DDG2P (AD ) (Congenital); Severe Paediatric Disorders (AD ) (-); Ataxia and cerebellar anomalies - narrow panel (AD ) (Nervous)	2
CTC1	LoF	Cerebroretinal microangiopathy with calcifications and cysts (612199) (AR)	Severe Paediatric Disorders (AR ) (-); White matter disorders and cerebral calcification - narrow panel (AR ) (Nervous); Retinal disorders (AR ) (Eye); Pulmonary fibrosis familial (AR ) (Respiratory); Haematological malignancies for rare disease (AR ) (Neoplasm); Fetal anomalies (AR ) (Congenital); Cytopenias and congenital anaemias (AR ) (Blood/Immune); COVID-19 research (AR ) (Blood/Immune)	6
CTCF	LoF	Intellectual developmental disorder, autosomal dominant 21 (615502) (AD)	Fetal anomalies (AD ) (Congenital); Severe Paediatric Disorders (AD ) (-); Severe microcephaly (AD ) (Nervous); Clefting (AD ) (Musculoskeletal/Connective)	3
CTDP1	LoF	Congenital cataracts, facial dysmorphism, and neuropathy (604168) (AR)	Severe Paediatric Disorders (AR ) (-); Hereditary neuropathy (AR ) (Nervous); DDG2P (AR ) (Congenital)	2
CTH	LoF	Cystathioninuria (219500) (AR)	Severe Paediatric Disorders (AD ) (-); Undiagnosed metabolic disorders (AR ) (Endocrine/Metabolic)	1
CTLA4	LoF	{Celiac disease, susceptibility to, 3} (609755);{Diabetes mellitus, insulin-dependent, 12} (601388);{Hashimoto thyroiditis} (140300) (AD);{Systemic lupus erythematosus, susceptibility to} (152700) (AD);Immune dysregulation with autoimmunity, immunodeficiency, and lymphoproliferation (616100) (AD);{Celiac disease, susceptibility to, 3} (609755);{Diabetes mellitus, insulin-dependent, 12} (601388);{…	Severe Paediatric Disorders (AD ) (-); Infantile enterocolitis & monogenic inflammatory bowel disease (AD ) (Digestive); COVID-19 research (AD ) (Blood/Immune)	2
CTNNA1	LoF	Macular dystrophy, patterned, 2 (608970) (AD)	Hereditary diffuse gastric cancer (AD ) (Neoplasm); Retinal disorders (AD ) (Eye)	2
CTNNA2	LoF	Cortical dysplasia, complex, with other brain malformations 9 (618174) (AR)	Severe Paediatric Disorders (AR ) (-); Malformations of cortical development (AR ) (Nervous); DDG2P (AR ) (Congenital)	2
CTNNB1	LoF	Colorectal cancer, somatic (114500);Exudative vitreoretinopathy 7 (617572) (AD);Hepatocellular carcinoma, somatic (114550);Medulloblastoma, somatic (155255);Neurodevelopmental disorder with spastic diplegia and visual defects (615075) (AD);Ovarian cancer, somatic (167000);Pilomatricoma, somatic (132600);Colorectal cancer, somatic (114500);Exudative vitreoretinopathy 7 (617572) (AD);Hepatocellular…	Fetal anomalies (AD ) (Congenital); Severe Paediatric Disorders (AD ) (-); Severe microcephaly (AD ) (Nervous); Retinal disorders (AD ) (Eye)	3
CTNND1	LoF	Blepharocheilodontic syndrome 2 (617681) (AD)	Fetal anomalies (AD ) (Congenital); Severe Paediatric Disorders (AD ) (-); Intellectual disability - microarray and sequencing (AD ) (Nervous); Familial non syndromic congenital heart disease (AD ) (Ear); Choanal atresia (AD ) (Musculoskeletal/Connective)	4
CTNND2	LoF	-	DDG2P (AD ) (Congenital)	1
CTNS	LoF	Cystinosis, atypical nephropathic (219800) (AR);Cystinosis, late-onset juvenile or adolescent nephropathic (219900) (AR);Cystinosis, nephropathic (219800) (AR);Cystinosis, ocular nonnephropathic (219750) (AR)	Severe Paediatric Disorders (AR ) (-); Unexplained young onset end-stage renal disease (AR ) (Genitourinary); Lysosomal storage disorder (AR ) (Endocrine/Metabolic); DDG2P (AR ) (Congenital)	3
CTPS1	LoF	Immunodeficiency 24 (615897) (AR)	Severe Paediatric Disorders (AR ) (-); COVID-19 research (AR ) (Blood/Immune)	1
CTR9	LoF	-	Intellectual disability - microarray and sequencing (AD ) (Nervous); Childhood solid tumours (AD ) (Neoplasm)	2
CTSA	LoF	Galactosialidosis (256540) (AR);Galactosialidosis (256540) (AR)	Adult onset neurodegenerative disorder (AD ) (Nervous); Skeletal dysplasia (AR ) (Musculoskeletal/Connective); Severe Paediatric Disorders (AR ) (-); Lysosomal storage disorder (AR ) (Endocrine/Metabolic); Fetal hydrops (AR ) (Congenital)	4
CTSC	LoF	Haim-Munk syndrome (245010) (AR);Papillon-Lefevre syndrome (245000) (AR);Periodontitis 1, juvenile (170650) (AR)	Palmoplantar keratoderma and erythrokeratodermas (AR ) (Skin); Undiagnosed metabolic disorders (AR ) (Endocrine/Metabolic); Skeletal dysplasia (AR ) (Musculoskeletal/Connective); Severe Paediatric Disorders (AR ) (-); COVID-19 research (AR ) (Blood/Immune)	4
CTSD	LoF	Ceroid lipofuscinosis, neuronal, 10 (610127) (AR)	Severe Paediatric Disorders (AR ) (-); Retinal disorders (AR ) (Eye); Neuronal ceroid lipofuscinosis (AR ) (Nervous); Lysosomal storage disorder (AR ) (Endocrine/Metabolic); Fetal anomalies (AR ) (Congenital)	4
CTSF	LoF	Ceroid lipofuscinosis, neuronal, 13 (Kufs type) (615362) (AR)	Severe Paediatric Disorders (AR ) (-); Neuronal ceroid lipofuscinosis (AR ) (Nervous); Lysosomal storage disorder (AR ) (Endocrine/Metabolic)	2
CTSK	LoF	Pycnodysostosis (265800) (AR)	Skeletal dysplasia (AR ) (Musculoskeletal/Connective); Severe Paediatric Disorders (AR ) (-); Lysosomal storage disorder (AR ) (Endocrine/Metabolic); Fetal anomalies (AR ) (Congenital)	3
CTU2	LoF	Microcephaly, facial dysmorphism, renal agenesis, and ambiguous genitalia syndrome (618142) (AR)	Severe microcephaly (AR ) (Nervous); Paediatric disorders - additional genes (AR ) (-); Fetal anomalies (AR ) (Congenital); Disorders of sex development (AR ) (Endocrine/Metabolic); CAKUT (AR ) (Genitourinary)	4
CUBN	LoF	[Proteinuria, chronic benign] (618884) (AR);Imerslund-Grasbeck syndrome 1 (261100) (AR)	Severe Paediatric Disorders (AR ) (-); Unexplained kidney failure in young people (AR ) (Genitourinary); Undiagnosed metabolic disorders (AR ) (Endocrine/Metabolic); Cytopenias and congenital anaemias (AR ) (Blood/Immune)	3
CUL3	LoF	Neurodevelopmental disorder with or without autism or seizures (619239) (AD);Pseudohypoaldosteronism, type IIE (614496) (AD)	DDG2P (AD ) (Congenital); Renal tubulopathies (AD ) (Genitourinary); Extreme early-onset hypertension (AD ) (Circulatory); Early onset or syndromic epilepsy (AD ) (Nervous)	4
CUL4B	LoF	Intellectual developmental disorder, X-linked syndromic, Cabezas type (300354) (XLR)	DDG2P (XLR ) (Congenital); Severe Paediatric Disorders (XLR ) (-); Intellectual disability - microarray and sequencing (XLR ) (Nervous); Hypogonadotropic hypogonadism (XLR ) (Endocrine/Metabolic); Fetal anomalies (XLR ) (Congenital); Early onset or syndromic epilepsy (XLR ) (Nervous); Disorders of sex development (XLR ) (Endocrine/Metabolic)	3
CUL7	LoF	3-M syndrome 1 (273750) (AR)	Skeletal dysplasia (AR ) (Musculoskeletal/Connective); Severe Paediatric Disorders (AR ) (-); IUGR and IGF abnormalities (AR ) (Congenital)	2
CUX1	LoF	Global developmental delay with or without impaired intellectual development (618330) (AD)	Severe Paediatric Disorders (AD ) (-); Intellectual disability - microarray and sequencing (AD ) (Nervous)	1
CUX2	LoF	Developmental and epileptic encephalopathy 67 (618141) (AD)	Severe Paediatric Disorders (AD ) (-); Early onset or syndromic epilepsy (AD ) (Nervous); DDG2P (AD ) (Congenital)	2
CWC27	LoF	Retinitis pigmentosa with or without skeletal anomalies (250410) (AR)	Severe Paediatric Disorders (AR ) (-); Retinal disorders (AR ) (Eye); Intellectual disability - microarray and sequencing (AR ) (Nervous); Fetal anomalies (AR ) (Congenital)	3
CWF19L1	LoF	Spinocerebellar ataxia, autosomal recessive 17 (616127) (AR)	Severe Paediatric Disorders (AR ) (-); Ataxia and cerebellar anomalies - narrow panel (AR ) (Nervous)	1
CXCR4	LoF	Myelokathexis, isolated (193670) (AD);WHIM syndrome 1 (193670) (AD)	Severe Paediatric Disorders (AD ) (-); Cytopenias and congenital anaemias (AD ) (Blood/Immune); COVID-19 research (AD ) (Blood/Immune)	1
CYB5A	LoF	Methemoglobinemia and ambiguous genitalia (250790) (AR)	Disorders of sex development (AR ) (Endocrine/Metabolic)	1
CYB5R3	LoF	Methemoglobinemia, type I (250800) (AR);Methemoglobinemia, type II (250800) (AR)	Severe Paediatric Disorders (AR ) (-); Rare anaemia (AR ) (Blood/Immune); Intellectual disability - microarray and sequencing (AR ) (Nervous); DDG2P (AR ) (Congenital)	3
CYBA	LoF	Chronic granulomatous disease 4, autosomal recessive (233690) (AR)	Severe Paediatric Disorders (AR ) (-); Infantile enterocolitis & monogenic inflammatory bowel disease (AR ) (Digestive); COVID-19 research (AR ) (Blood/Immune)	2
CYBB	LoF	Chronic granulomatous disease, X-linked (306400) (XLR);Immunodeficiency 34, mycobacteriosis, X-linked (300645) (XLR)	Severe Paediatric Disorders (XLR ) (-); Primary immunodeficiency or monogenic inflammatory bowel disease (XLR ) (Blood/Immune); Gastrointestinal epithelial barrier disorders (XLR ) (Digestive); COVID-19 research (XLR ) (Blood/Immune)	2
CYBC1	LoF	Chronic granulomatous disease 5, autosomal recessive (618935) (AR)	COVID-19 research (AR ) (Blood/Immune)	1
CYBRD1	LoF	-	Iron metabolism disorders - NOT common HFE mutations (AR ) (Endocrine/Metabolic)	1
CYC1	LoF	Mitochondrial complex III deficiency, nuclear type 6 (615453) (AR)	Severe Paediatric Disorders (AR ) (-); Undiagnosed metabolic disorders (AR ) (Endocrine/Metabolic); Mitochondrial disorder with complex III deficiency (AR ) (Endocrine/Metabolic); Intellectual disability - microarray and sequencing (AR ) (Nervous); DDG2P (AR ) (Congenital)	3
CYCS	LoF	Thrombocytopenia 4 (612004) (AD)	Severe Paediatric Disorders (AD ) (-); Inherited bleeding disorders (AD ) (Blood/Immune)	1
CYFIP2	GoF	Developmental and epileptic encephalopathy 65 (618008) (AD)	Severe Paediatric Disorders (AD_GOF ) (-); Early onset or syndromic epilepsy (AD_GOF ) (Nervous); DDG2P (AD_GOF ) (Congenital)	2
CYLD	LoF+GoF	?Frontotemporal dementia and/or amyotrophic lateral sclerosis 8 (619132) (AD);Brooke-Spiegler syndrome (605041) (AD);Cylindromatosis, familial (132700) (AD);Trichoepithelioma, multiple familial, 1 (601606) (AD)	Multiple monogenic benign skin tumours (AD ) (Skin)	1
CYP11A1	LoF	Adrenal insufficiency, congenital, with 46XY sex reversal, partial or complete (613743)	Fetal anomalies (AD ) (Congenital); Severe Paediatric Disorders (AD ) (-); Congenital adrenal hypoplasia (AD ) (Endocrine/Metabolic)	2
CYP11B1	LoF	Adrenal hyperplasia, congenital, due to 11-beta-hydroxylase deficiency (202010) (AR);Aldosteronism, glucocorticoid-remediable (103900) (AD)	Severe Paediatric Disorders (AD ) (-); Fetal anomalies (AR ) (Congenital); Extreme early-onset hypertension (AD ) (Circulatory); Disorders of sex development (AR ) (Endocrine/Metabolic)	3
CYP11B2	LoF	{Low renin hypertension, susceptibility to};Aldosterone to renin ratio raised;Hypoaldosteronism, congenital, due to CMO I deficiency (203400) (AR);Hypoaldosteronism, congenital, due to CMO II deficiency (610600) (AR)	Extreme early-onset hypertension (AD ) (Circulatory)	1
CYP17A1	LoF	17-alpha-hydroxylase/17,20-lyase deficiency (202110) (AR);17,20-lyase deficiency, isolated (202110) (AR)	Severe Paediatric Disorders (AR ) (-); Primary ovarian insufficiency (AR ) (Endocrine/Metabolic); Fetal anomalies (AR ) (Congenital); Extreme early-onset hypertension (AR ) (Circulatory)	3
CYP19A1	LoF+GoF	Aromatase deficiency (613546);Aromatase excess syndrome (139300) (AD)	Primary ovarian insufficiency (AR ) (Endocrine/Metabolic)	1
CYP1B1	LoF	Anterior segment dysgenesis 6, multiple subtypes (617315) (AR);Glaucoma 3A, primary open angle, congenital, juvenile, or adult onset (231300) (AR)	Severe Paediatric Disorders (AD ) (-); Glaucoma developmental (AR ) (Eye); Fetal anomalies (AR ) (Congenital)	2
CYP21A2	LoF	Adrenal hyperplasia, congenital, due to 21-hydroxylase deficiency (201910) (AR);Hyperandrogenism, nonclassic type, due to 21-hydroxylase deficiency (201910) (AR)	Severe Paediatric Disorders (AR ) (-); Fetal anomalies (AR ) (Congenital); Disorders of sex development (AR ) (Endocrine/Metabolic)	2
CYP24A1	LoF	Hypercalcemia, infantile, 1 (143880) (AR);Hypercalcemia, infantile, 1 (143880) (AR)	Nephrocalcinosis or nephrolithiasis (AR ) (Genitourinary)	1
CYP26B1	LoF	Craniosynostosis with radiohumeral fusions and other skeletal and craniofacial anomalies (614416)	Fetal anomalies (AR ) (Congenital); Rare syndromic craniosynostosis or isolated multisuture synostosis (AR ) (Musculoskeletal/Connective)	2
CYP27A1	LoF	Cerebrotendinous xanthomatosis (213700) (AR)	Severe Paediatric Disorders (AR ) (-); White matter disorders and cerebral calcification - narrow panel (AR ) (Nervous); Neonatal cholestasis (AR ) (Digestive); Familial hypercholesterolaemia (AR ) (Endocrine/Metabolic); DDG2P (AR ) (Congenital); Bilateral congenital or childhood onset cataracts (AR ) (Eye)	5
CYP27B1	LoF	Vitamin D-dependent rickets, type I (264700) (AR)	Skeletal dysplasia (AR ) (Musculoskeletal/Connective); Severe Paediatric Disorders (AR ) (-); Hypophosphataemia or rickets (AR ) (Endocrine/Metabolic)	2
CYP2R1	LoF	Rickets due to defect in vitamin D 25-hydroxylation deficiency (600081) (AR)	Skeletal dysplasia (AR ) (Musculoskeletal/Connective); Hypophosphataemia or rickets (AR ) (Endocrine/Metabolic)	2
CYP2U1	LoF	Spastic paraplegia 56, autosomal recessive (615030) (AR)	Severe Paediatric Disorders (AR ) (-); White matter disorders and cerebral calcification - narrow panel (AR ) (Nervous); Fetal anomalies (AR ) (Congenital)	2
CYP4F22	LoF	Ichthyosis, congenital, autosomal recessive 5 (604777) (AR)	Autosomal recessive congenital ichthyosis (AR ) (Skin); Severe Paediatric Disorders (AR ) (-); Fetal anomalies (AR ) (Congenital)	2
CYP4V2	LoF	Bietti crystalline corneoretinal dystrophy (210370) (AR)	Retinal disorders (AR ) (Eye)	1
CYP51A1	LoF	-	Bilateral congenital or childhood onset cataracts (AR ) (Eye)	1
CYP7B1	LoF	Bile acid synthesis defect, congenital, 3 (613812) (AR);Spastic paraplegia 5A, autosomal recessive (270800) (AR)	Severe Paediatric Disorders (AR ) (-); White matter disorders and cerebral calcification - narrow panel (AR ) (Nervous); Undiagnosed metabolic disorders (AR ) (Endocrine/Metabolic); Neonatal cholestasis (AR ) (Digestive)	3
D2HGDH	LoF	D-2-hydroxyglutaric aciduria (600721) (AR)	Severe Paediatric Disorders (AR ) (-); White matter disorders and cerebral calcification - narrow panel (AR ) (Nervous); Undiagnosed metabolic disorders (AR ) (Endocrine/Metabolic)	2
DAAM2	LoF	Nephrotic syndrome, type 24 (619263) (AR)	Proteinuric renal disease (AR ) (Genitourinary)	1
DAB1	GoF	Spinocerebellar ataxia 37 (615945) (AD)	Severe Paediatric Disorders (AD_GOF ) (Nervous)	1
DAG1	LoF	Muscular dystrophy-dystroglycanopathy (congenital with brain and eye anomalies), type A, 9 (616538) (AR);Muscular dystrophy-dystroglycanopathy (limb-girdle), type C, 9 (613818) (AR)	Severe Paediatric Disorders (AR ) (-); Other rare neuromuscular disorders (AR ) (Musculoskeletal/Connective); Hydrocephalus (AR ) (Nervous); Fetal anomalies (AR ) (Congenital); COVID-19 research (Unknown ) (Blood/Immune)	4
DAGLA	LoF	Neuroocular syndrome 2, paroxysmal type (168885) (AD)	Hereditary ataxia (AD ) (Nervous); Infantile nystagmus (AD ) (Eye)	2
DARS1	LoF	Hypomyelination with brainstem and spinal cord involvement and leg spasticity (615281) (AR)	Severe Paediatric Disorders (AR ) (-); White matter disorders and cerebral calcification - narrow panel (AR ) (Nervous); Undiagnosed metabolic disorders (AR ) (Endocrine/Metabolic); Fetal anomalies (AR ) (Congenital)	3
DARS2	LoF	Leukoencephalopathy with brain stem and spinal cord involvement and lactate elevation (611105) (AR)	Severe Paediatric Disorders (AR ) (-); White matter disorders and cerebral calcification - narrow panel (AR ) (Nervous); Undiagnosed metabolic disorders (AR ) (Endocrine/Metabolic); Possible mitochondrial disorder - nuclear genes (AR ) (Endocrine/Metabolic); Fetal anomalies (AR ) (Congenital)	3
DAW1	LoF	Ciliary dyskinesia, primary, 52 (620570) (AR)	Non-CF bronchiectasis (AR ) (Respiratory); DDG2P (AR ) (Congenital)	2
DBH	LoF	Orthostatic hypotension 1, due to DBH deficiency (223360) (AR)	Severe Paediatric Disorders (AR ) (-); Undiagnosed metabolic disorders (AR ) (Endocrine/Metabolic); Neurotransmitter disorders (AR ) (Nervous)	2
DBR1	LoF	{Encephalitis, acute, infection (viral)-induced, susceptibility to, 11} (619441) (AR);Xerosis and growth failure with immune and pulmonary dysfunction syndrome (620510) (AR)	COVID-19 research (AR ) (Blood/Immune)	1
DBT	LoF	Maple syrup urine disease, type II (620699) (AR)	Severe Paediatric Disorders (AR ) (-); Hyperammonaemia (AR ) (Endocrine/Metabolic); Early onset or syndromic epilepsy (AR ) (Nervous); DDG2P (AR ) (Congenital)	3
DCAF17	LoF	Woodhouse-Sakati syndrome (241080) (AR)	Severe Paediatric Disorders (AR ) (-); Familial diabetes (AR ) (Endocrine/Metabolic); Early onset dystonia (AR ) (Nervous)	2
DCC	LoF	Colorectal cancer, somatic (114500);Esophageal carcinoma, somatic (133239);Gaze palsy, familial horizontal, with progressive scoliosis, 2 (617542) (AR);Mirror movements 1 and/or agenesis of the corpus callosum (157600) (AD);Colorectal cancer, somatic (114500);Esophageal carcinoma, somatic (133239);Gaze palsy, familial horizontal, with progressive scoliosis, 2 (617542) (AR);Mirror movements 1 and/…	Severe Paediatric Disorders (AD ) (-); DDG2P (AR ) (Congenital)	1
DCDC2	LoF	?Deafness, autosomal recessive 66 (610212) (AR);Nephronophthisis 19 (616217) (AR);Sclerosing cholangitis, neonatal (617394) (AR)	Severe Paediatric Disorders (AR ) (-); Neonatal cholestasis (AR ) (Digestive); DDG2P (AR ) (Congenital)	2
DCHS1	LoF	Mitral valve prolapse 2 (607829) (AD);Van Maldergem syndrome 1 (601390) (AR)	Severe Paediatric Disorders (AD ) (-); Malformations of cortical development (AR ) (Nervous); Fetal anomalies (AR ) (Congenital)	2
DCLRE1B	LoF	Dyskeratosis congenita, autosomal recessive 8 (620133) (AR)	Severe Paediatric Disorders (AR ) (-); COVID-19 research (AR ) (Blood/Immune)	1
DCLRE1C	LoF	Omenn syndrome (603554) (AR);Severe combined immunodeficiency, Athabascan type (602450) (AR);Omenn syndrome (603554) (AR);Severe combined immunodeficiency, Athabascan type (602450) (AR)	Severe Paediatric Disorders (AR ) (-); Gastrointestinal epithelial barrier disorders (AR ) (Digestive); COVID-19 research (AR ) (Blood/Immune)	2
DCN	LoF	Corneal dystrophy, congenital stromal (610048) (AD)	Corneal abnormalities (AD ) (Eye)	1
DCPS	LoF	Al-Raqad syndrome (616459) (AR)	Severe Paediatric Disorders (AR ) (-); Intellectual disability - microarray and sequencing (AR ) (Nervous)	1
DCT	LoF	Oculocutaneous albinism, type VIII (619165) (AR)	Albinism or congenital nystagmus (AR ) (Skin)	1
DCTN1	LoF+GoF	{Amyotrophic lateral sclerosis, susceptibility to} (105400) (AD, AR);Neuronopathy, distal hereditary motor, autosomal dominant 14 (607641) (AD);Perry syndrome (168605) (AD);{Amyotrophic lateral sclerosis, susceptibility to} (105400) (AD, AR);Neuronopathy, distal hereditary motor, autosomal dominant 14 (607641) (AD);Perry syndrome (168605) (AD);{Amyotrophic lateral sclerosis, susceptibility to} (1…	Severe Paediatric Disorders (AD ) (-); Parkinson Disease and Complex Parkinsonism (AD ) (Nervous); Amyotrophic lateral sclerosis/motor neuron disease (AD ) (Musculoskeletal/Connective)	2
DCX	LoF	Lissencephaly, X-linked (300067) (XL);Subcortical laminal heterotopia, X-linked (300067) (XL)	DDG2P (XLD ) (Congenital); Severe Paediatric Disorders (XLD ) (-); Malformations of cortical development (XLD ) (Nervous); Intellectual disability - microarray and sequencing (XLD ) (Nervous); Fetal anomalies (XLD ) (Congenital); Early onset or syndromic epilepsy (XLD ) (Nervous)	2
DCXR	LoF	[Pentosuria] (260800) (AR)	Undiagnosed metabolic disorders (AR ) (Endocrine/Metabolic)	1
DDB1	LoF+GoF	White-Kernohan syndrome (619426) (AD)	DDG2P (AD ) (Congenital); Intellectual disability - microarray and sequencing (AD ) (Nervous)	2
DDB2	LoF	Xeroderma pigmentosum, group E, DDB-negative subtype (278740) (AR)	Xeroderma pigmentosum, Trichothiodystrophy or Cockayne syndrome (AR ) (Skin); White matter disorders and cerebral calcification - narrow panel (AR ) (Nervous); Severe Paediatric Disorders (AR ) (-); DDG2P (AR ) (Congenital); Childhood solid tumours (AR ) (Neoplasm)	4
DDC	LoF	Aromatic L-amino acid decarboxylase deficiency (608643) (AR)	Severe Paediatric Disorders (AR ) (-); Undiagnosed metabolic disorders (AR ) (Endocrine/Metabolic); Neurotransmitter disorders (AR ) (Nervous); DDG2P (AR ) (Congenital)	3
DDHD1	LoF	Spastic paraplegia 28, autosomal recessive (609340) (AR)	Severe Paediatric Disorders (AR ) (-); Hereditary spastic paraplegia (AR ) (Nervous); DDG2P (AR ) (Congenital)	2
DDHD2	LoF	Spastic paraplegia 54, autosomal recessive (615033) (AR)	Severe Paediatric Disorders (AR ) (-); DDG2P (AR ) (Congenital); Ataxia and cerebellar anomalies - narrow panel (AR ) (Nervous)	2
DDOST	LoF	Congenital disorder of glycosylation, type Ir (614507) (AR)	DDG2P (AR ) (Congenital)	1
DDR2	LoF	Spondylometaepiphyseal dysplasia, short limb-hand type (271665) (AR);Warburg-Cinotti syndrome (618175) (AD)	Severe Paediatric Disorders (AD ) (-); Skeletal dysplasia (AR ) (Musculoskeletal/Connective); Fetal anomalies (AR ) (Congenital)	2
DDRGK1	LoF	Spondyloepimetaphyseal dysplasia, Shohat type (602557) (AR);Spondyloepimetaphyseal dysplasia, Shohat type (602557) (AR)	Skeletal dysplasia (AR ) (Musculoskeletal/Connective)	1
DDX11	LoF	Warsaw breakage syndrome (613398) (AR)	Severe Paediatric Disorders (AR ) (-); Severe microcephaly (AR ) (Nervous); Fetal anomalies (AR ) (Congenital)	2
DDX23	LoF	-	DDG2P (AD ) (Congenital); Intellectual disability - microarray and sequencing (AD ) (Nervous)	2
DDX3X	LoF	Intellectual developmental disorder, X-linked syndromic, Snijders Blok type (300958) (XLD, XLR)	Pigmentary skin disorders (XLD ) (Skin); Severe Paediatric Disorders (XLD ) (-); Intellectual disability - microarray and sequencing (XLD ) (Nervous); Fetal anomalies (XLD ) (Congenital); Early onset or syndromic epilepsy (XLD ) (Nervous); DDG2P (XLD ) (Congenital); Childhood onset hereditary spastic paraplegia (XLD ) (Nervous)	3
DDX41	LoF	{Myeloproliferative/lymphoproliferative neoplasms, familial (multiple types), susceptibility to} (616871) (AD)	Haematological malignancies for rare disease (AD ) (Neoplasm); Cytopenia - NOT Fanconi anaemia (AD ) (Blood/Immune)	2
DDX59	LoF	Orofaciodigital syndrome V (174300) (AR)	Limb disorders (AR ) (Musculoskeletal/Connective); Unexplained young onset end-stage renal disease (AR ) (Genitourinary); Severe Paediatric Disorders (AR ) (-); Rare multisystem ciliopathy disorders (AR ) (Congenital); Ophthalmological ciliopathies (AR ) (Eye); Intellectual disability - microarray and sequencing (AR ) (Nervous); Fetal anomalies (AR ) (Congenital)	5
DDX6	LoF	Intellectual developmental disorder with impaired language and dysmorphic facies (618653) (AD)	DDG2P (AD ) (Congenital); Intellectual disability - microarray and sequencing (AD ) (Nervous)	2
DEAF1	LoF	Neurodevelopmental disorder with hypotonia, impaired expressive language, and with or without seizures (617171) (AR);Vulto-van Silfout-de Vries syndrome (615828) (AD)	DDG2P (AD ) (Congenital); Severe Paediatric Disorders (AD ) (-); Early onset or syndromic epilepsy (AD ) (Nervous)	2
DEF6	LoF	Immunodeficiency 87 and autoimmunity (619573) (AR)	COVID-19 research (AR ) (Blood/Immune)	1
DEGS1	LoF	Leukodystrophy, hypomyelinating, 18 (618404) (AR)	Severe Paediatric Disorders (AR ) (-); White matter disorders and cerebral calcification - narrow panel (AR ) (Nervous); DDG2P (AR ) (Congenital)	2
DENND5A	LoF	Developmental and epileptic encephalopathy 49 (617281) (AR)	Severe Paediatric Disorders (AR ) (-); Hydrocephalus (AR ) (Nervous); Fetal anomalies (AR ) (Congenital)	2
DEPDC5	LoF	Developmental and epileptic encephalopathy 111 (620504) (AR);Epilepsy, familial focal, with variable foci 1 (604364) (AD)	DDG2P (AD ) (Congenital); Severe Paediatric Disorders (AD ) (-); Intellectual disability - microarray and sequencing (AD ) (Nervous)	2
DES	LoF	Cardiomyopathy, dilated, 1I (604765) (AD);Myopathy, myofibrillar, 1 (601419) (AD, AR);Scapuloperoneal syndrome, neurogenic, Kaeser type (181400) (AD)	Severe Paediatric Disorders (AD ) (-); Gastrointestinal neuromuscular disorders (AD ) (Digestive); Distal myopathies (AD ) (Musculoskeletal/Connective); Dilated Cardiomyopathy and conduction defects (AD ) (Circulatory)	3
DGAT1	LoF	Diarrhea 7, protein-losing enteropathy type (615863) (AR)	Intestinal failure or congenital diarrhoea (AR ) (Digestive)	1
DGCR8	LoF	-	Familial tumours of the nervous system (AD ) (Neoplasm)	1
DGKE	LoF	{Hemolytic uremic syndrome, atypical, susceptibility to, 7} (615008) (AR);Nephrotic syndrome, type 7 (615008) (AR)	Severe Paediatric Disorders (AR ) (-); Membranoproliferative glomerulonephritis including C3 glomerulopathy (AR ) (Genitourinary); Atypical haemolytic uraemic syndrome (AR ) (Blood/Immune)	2
DGUOK	LoF	Mitochondrial DNA depletion syndrome 3 (hepatocerebral type) (251880) (AR);Portal hypertension, noncirrhotic, 1 (617068) (AR);Progressive external ophthalmoplegia with mitochondrial DNA deletions, autosomal recessive 4 (617070) (AR)	Severe Paediatric Disorders (AR ) (-); White matter disorders and cerebral calcification - narrow panel (AR ) (Nervous); Undiagnosed metabolic disorders (AR ) (Endocrine/Metabolic); Rhabdomyolysis and metabolic muscle disorders (AR ) (Musculoskeletal/Connective); Neonatal cholestasis (AR ) (Digestive); Mitochondrial liver disease, including transient infantile liver failure (AR ) (Endocrine/Metab…	5
DHCR24	LoF	Desmosterolosis (602398) (AR)	Skeletal dysplasia (AR ) (Musculoskeletal/Connective); Undiagnosed metabolic disorders (AR ) (Endocrine/Metabolic); Severe Paediatric Disorders (AR ) (-); Hydrocephalus (AR ) (Nervous); Fetal anomalies (AR ) (Congenital); Arthrogryposis (AR ) (Musculoskeletal/Connective)	4
DHCR7	LoF	Smith-Lemli-Opitz syndrome (270400) (AR)	Skeletal dysplasia (AR ) (Musculoskeletal/Connective); Undiagnosed metabolic disorders (AR ) (Endocrine/Metabolic); Severe Paediatric Disorders (AR ) (-); Rare multisystem ciliopathy disorders (AR ) (Congenital); IUGR and IGF abnormalities (AR ) (Congenital); Holoprosencephaly - NOT chromosomal (AR ) (Nervous); Disorders of sex development (AR ) (Endocrine/Metabolic); CAKUT (AR ) (Genitourinary);…	6
DHDDS	LoF	?Congenital disorder of glycosylation, type 1bb (613861) (AR);Developmental delay and seizures with or without movement abnormalities (617836) (AD);Retinitis pigmentosa 59 (613861) (AR)	DDG2P (AD ) (Congenital); Severe Paediatric Disorders (AD ) (-); Retinal disorders (AR ) (Eye); Ataxia and cerebellar anomalies - narrow panel (AD ) (Nervous)	3
DHFR	LoF	Megaloblastic anemia due to dihydrofolate reductase deficiency (613839) (AR)	Severe Paediatric Disorders (AR ) (-); Neurotransmitter disorders (AR ) (Nervous); Fetal anomalies (AR ) (Congenital); Cytopenias and congenital anaemias (AR ) (Blood/Immune); Cerebral folate deficiency (AR ) (Endocrine/Metabolic)	4
DHH	LoF	46XY gonadal dysgenesis with minifascicular neuropathy (607080) (AR);46XY sex reversal 7 (233420) (AR)	Disorders of sex development (AR ) (Endocrine/Metabolic)	1
DHODH	LoF	Miller syndrome (263750) (AR)	Fetal anomalies (AR ) (Congenital); Undiagnosed metabolic disorders (AR ) (Endocrine/Metabolic); Skeletal dysplasia (AR ) (Musculoskeletal/Connective); Severe Paediatric Disorders (AR ) (-); Deafness and congenital structural abnormalities (AR ) (Ear)	4
DHPS	LoF	Neurodevelopmental disorder with seizures and speech and walking impairment (618480) (AR)	Severe Paediatric Disorders (AR ) (-); Early onset or syndromic epilepsy (AR ) (Nervous); DDG2P (AR ) (Congenital)	2
DHTKD1	LoF	?Charcot-Marie-Tooth disease, axonal, type 2Q (615025) (AD);Alpha-aminoadipic and alpha-ketoadipic aciduria (204750) (AR)	Severe Paediatric Disorders (AD ) (-); Undiagnosed metabolic disorders (AR ) (Endocrine/Metabolic); Intellectual disability - microarray and sequencing (AR ) (Nervous); DDG2P (AR ) (Congenital)	3
DHX30	LoF	Neurodevelopmental disorder with variable motor and speech impairment (617804) (AD)	Severe Paediatric Disorders (AD ) (-); Early onset or syndromic epilepsy (AD ) (Nervous); DDG2P (AD ) (Congenital)	2
DHX37	LoF	46XY sex reversal 11 (273250) (AD);Neurodevelopmental disorder with brain anomalies and with or without vertebral or cardiac anomalies (618731) (AR)	Intellectual disability - microarray and sequencing (AD ) (Nervous); Disorders of sex development (AD ) (Endocrine/Metabolic)	2
DIAPH1	LoF+GoF	Deafness, autosomal dominant 1, with or without thrombocytopenia (124900) (AD);Seizures, cortical blindness, microcephaly syndrome (616632) (AR)	Severe Paediatric Disorders (AD_GOF ) (-); Severe microcephaly (AR ) (Nervous); Monogenic hearing loss (AD_GOF ) (Ear); Inherited bleeding disorders (AD_GOF ) (Blood/Immune); Fetal anomalies (AR ) (Congenital)	4
DICER1	LoF	GLOW syndrome, somatic mosaic (618272);Goiter, multinodular 1, with or without Sertoli-Leydig cell tumors (138800) (AD);Pleuropulmonary blastoma (601200) (AD);Rhabdomyosarcoma, embryonal, 2 (180295)	Inherited non-medullary thyroid cancer (AD ) (Neoplasm); COVID-19 research (Unknown ) (Blood/Immune)	2
DIS3L2	LoF	Perlman syndrome (267000) (AR)	Skeletal dysplasia (AR ) (Musculoskeletal/Connective); Severe Paediatric Disorders (AR ) (-); Intellectual disability - microarray and sequencing (AR ) (Nervous); Childhood solid tumours (AR ) (Neoplasm); Beckwith-Wiedemann syndrome BWS and other congenital overgrowth disorders (AR ) (Congenital)	4
DISP1	LoF	-	Fetal anomalies (AD ) (Congenital); Severe Paediatric Disorders (AD ) (-); Holoprosencephaly - NOT chromosomal (AD ) (Nervous)	2
DKC1	LoF	?Cataracts, hearing impairment, nephrotic syndrome, and enterocolitis 1 (301108) (XLD);Dyskeratosis congenita, X-linked (305000) (XLR)	Pigmentary skin disorders (XLD ) (Skin); Severe Paediatric Disorders (XLD ) (-); Pulmonary fibrosis familial (XLD ) (Respiratory); Primary immunodeficiency or monogenic inflammatory bowel disease (XLD ) (Blood/Immune); Intellectual disability - microarray and sequencing (XLD ) (Nervous); Haematological malignancies for rare disease (XLD ) (Neoplasm); Haematological malignancies cancer susceptibil…	6
DLAT	LoF	Pyruvate dehydrogenase E2 deficiency (245348) (AR)	Severe Paediatric Disorders (AR ) (-); Pyruvate dehydrogenase PDH deficiency (AR ) (Endocrine/Metabolic); Possible mitochondrial disorder - nuclear genes (AR ) (Endocrine/Metabolic); Early onset dystonia (AR ) (Nervous); DDG2P (AR ) (Congenital)	3
DLC1	LoF	Colorectal cancer, somatic (114500);Colorectal cancer, somatic (114500);Colorectal cancer, somatic (114500);Colorectal cancer, somatic (114500);Colorectal cancer, somatic (114500);Colorectal cancer, somatic (114500);Colorectal cancer, somatic (114500);Colorectal cancer, somatic (114500);Colorectal cancer, somatic (114500)	Unexplained young onset end-stage renal disease (AR ) (Genitourinary)	1
DLD	LoF	Dihydrolipoamide dehydrogenase deficiency (246900) (AR)	Severe Paediatric Disorders (AR ) (-); Pyruvate dehydrogenase PDH deficiency (AR ) (Endocrine/Metabolic); Possible mitochondrial disorder - nuclear genes (AR ) (Endocrine/Metabolic); Intellectual disability - microarray and sequencing (AR ) (Nervous); DDG2P (AR ) (Congenital)	3
DLG3	LoF	Intellectual developmental disorder, X-linked 90 (300850) (XLR)	Severe Paediatric Disorders (XLR ) (-); Intellectual disability - microarray and sequencing (XLR ) (Nervous); DDG2P (XLR ) (Congenital)	2
DLG4	LoF	Intellectual developmental disorder, autosomal dominant 62 (618793) (AD)	DDG2P (AD ) (Congenital); Severe Paediatric Disorders (AD ) (-); Intellectual disability - microarray and sequencing (AD ) (Nervous)	2
DLG5	LoF	Yuksel-Vogel-Bauser syndrome (620703) (AR)	Renal ciliopathies (AD ) (Genitourinary)	1
DLL1	LoF	Neurodevelopmental disorder with nonspecific brain abnormalities and with or without seizures (618709) (AD)	Early onset or syndromic epilepsy (AD ) (Nervous)	1
DLL3	LoF	Spondylocostal dysostosis 1, autosomal recessive (277300) (AR)	Skeletal dysplasia (AR ) (Musculoskeletal/Connective); Severe Paediatric Disorders (AR ) (-); Fetal anomalies (AR ) (Congenital)	2
DLL4	LoF	Adams-Oliver syndrome 6 (616589) (AD)	Fetal anomalies (AD ) (Congenital); Severe Paediatric Disorders (AD ) (-); Limb disorders (AD ) (Musculoskeletal/Connective)	2
DLST	LoF	Pheochromocytoma/paraganglioma syndrome 7 (618475) (AD)	Inherited phaeochromocytoma and paraganglioma excluding NF1 (AD ) (Neoplasm)	1
DLX3	LoF	Amelogenesis imperfecta, type IV (104510) (AD);Trichodontoosseous syndrome (190320) (AD)	Skeletal dysplasia (AD ) (Musculoskeletal/Connective); Severe Paediatric Disorders (AD ) (-)	1
DLX5	LoF	?Split-hand/foot malformation 1 with sensorineural hearing loss (220600) (AR);Split-hand/foot malformation 1 (183600) (AD)	Fetal anomalies (AD ) (Congenital); Severe Paediatric Disorders (AR ) (-); Limb disorders (AD ) (Musculoskeletal/Connective)	2
DMD	LoF	Becker muscular dystrophy (300376) (XLR);Cardiomyopathy, dilated, 3B (302045) (XL);Duchenne muscular dystrophy (310200) (XLR)	DDG2P (XLR ) (Congenital); Severe Paediatric Disorders (XLR ) (-); Rhabdomyolysis and metabolic muscle disorders (XLR ) (Musculoskeletal/Connective); Paediatric or syndromic cardiomyopathy (XLR ) (Circulatory); Other rare neuromuscular disorders (XLR ) (Musculoskeletal/Connective); Limb girdle muscular dystrophies, myofibrillar myopathies and distal myopathies (XLR ) (Musculoskeletal/Connective);…	5
DMP1	LoF	Hypophosphatemic rickets, AR (241520) (AR)	Skeletal dysplasia (AR ) (Musculoskeletal/Connective); Severe Paediatric Disorders (AR ) (-); Hypophosphataemia or rickets (AR ) (Endocrine/Metabolic); DDG2P (AR ) (Congenital)	3
DMPK	GoF	Myotonic dystrophy 1 (160900) (AD)	Severe Paediatric Disorders (AD_GOF ) (Musculoskeletal/Connective)	1
DMXL2	LoF	?Deafness, autosomal dominant 71 (617605) (AD);?Polyendocrine-polyneuropathy syndrome (616113) (AR);Developmental and epileptic encephalopathy 81 (618663) (AR)	Monogenic hearing loss (AD ) (Ear); Early onset or syndromic epilepsy (AR ) (Nervous)	2
DNA2	LoF	Progressive external ophthalmoplegia with mitochondrial DNA deletions, autosomal dominant 6 (615156) (AD);Rothmund-Thomson syndrome, type 4 (620819) (AR);Seckel syndrome 8 (615807) (AR)	Severe Paediatric Disorders (AD ) (-); Undiagnosed metabolic disorders (AD ) (Endocrine/Metabolic); Severe microcephaly (AR ) (Nervous); Mitochondrial DNA maintenance disorder (AD ) (Endocrine/Metabolic); Fetal anomalies (AR ) (Congenital)	3
DNAAF1	LoF	Ciliary dyskinesia, primary, 13 (613193) (AR)	Severe Paediatric Disorders (AR ) (-); Respiratory ciliopathies including non-CF bronchiectasis (AR ) (Respiratory); Primary ciliary disorders (AR ) (Congenital); Laterality disorders and isomerism (AR ) (Congenital)	2
DNAAF11	LoF	Ciliary dyskinesia, primary, 19 (614935) (AR)	Severe Paediatric Disorders (AR ) (-); Respiratory ciliopathies including non-CF bronchiectasis (AR ) (Respiratory); Primary ciliary disorders (AR ) (Congenital); Laterality disorders and isomerism (AR ) (Congenital)	2
DNAAF2	LoF	Ciliary dyskinesia, primary, 10 (612518) (AR)	Respiratory ciliopathies including non-CF bronchiectasis (AR ) (Respiratory); Primary ciliary disorders (AR ) (Congenital); Fetal anomalies (AR ) (Congenital)	2
DNAAF3	LoF	Ciliary dyskinesia, primary, 2 (606763) (AR)	Severe Paediatric Disorders (AR ) (-); Respiratory ciliopathies including non-CF bronchiectasis (AR ) (Respiratory); Primary ciliary disorders (AR ) (Congenital); Laterality disorders and isomerism (AR ) (Congenital)	2
DNAAF4	LoF	{Dyslexia, susceptibility to, 1} (127700) (AD);Ciliary dyskinesia, primary, 25 (615482) (AR)	Severe Paediatric Disorders (AR ) (-); Respiratory ciliopathies including non-CF bronchiectasis (AR ) (Respiratory); Primary ciliary disorders (AR ) (Congenital); Laterality disorders and isomerism (AR ) (Congenital)	2
DNAAF5	LoF	Ciliary dyskinesia, primary, 18 (614874) (AR)	Respiratory ciliopathies including non-CF bronchiectasis (AR ) (Respiratory); Primary ciliary disorders (AR ) (Congenital); Laterality disorders and isomerism (AR ) (Congenital)	2
DNAAF6	LoF	Ciliary dyskinesia, primary, 36, X-linked (300991) (XLR)	Respiratory ciliopathies including non-CF bronchiectasis (XLR ) (Respiratory); Primary ciliary disorders (XLR ) (Congenital); Laterality disorders and isomerism (XLR ) (Congenital); Fetal anomalies (XLR ) (Congenital); DDG2P (XLR ) (Congenital)	2
DNAH11	LoF	Ciliary dyskinesia, primary, 7, with or without situs inversus (611884) (AR)	Severe Paediatric Disorders (AR ) (-); Respiratory ciliopathies including non-CF bronchiectasis (AR ) (Respiratory); Primary ciliary disorders (AR ) (Congenital); Laterality disorders and isomerism (AR ) (Congenital)	2
DNAH5	LoF	Ciliary dyskinesia, primary, 3, with or without situs inversus (608644) (AR)	Severe Paediatric Disorders (AR ) (-); Primary ciliary disorders (AR ) (Congenital); Non-CF bronchiectasis (AR ) (Respiratory); Laterality disorders and isomerism (AR ) (Congenital)	2
DNAH9	LoF	Ciliary dyskinesia, primary, 40 (618300) (AR)	Severe Paediatric Disorders (AR ) (-); Respiratory ciliopathies including non-CF bronchiectasis (AR ) (Respiratory); Laterality disorders and isomerism (AR ) (Congenital)	2
DNAI1	LoF	Ciliary dyskinesia, primary, 1, with or without situs inversus (244400) (AR)	Severe Paediatric Disorders (AR ) (-); Respiratory ciliopathies including non-CF bronchiectasis (AR ) (Respiratory); Primary ciliary disorders (AR ) (Congenital); Laterality disorders and isomerism (AR ) (Congenital)	2
DNAI2	LoF	Ciliary dyskinesia, primary, 9, with or without situs inversus (612444) (AR)	Respiratory ciliopathies including non-CF bronchiectasis (AR ) (Respiratory); Primary ciliary disorders (AR ) (Congenital); Laterality disorders and isomerism (AR ) (Congenital)	2
DNAJB11	LoF	Polycystic kidney disease 6 with or without polycystic liver disease (618061) (AD)	Ductal plate malformation (AD ) (Congenital); Tubulointerstitial kidney disease (AD ) (Genitourinary); Severe Paediatric Disorders (AD ) (-); Polycystic liver disease (AD ) (Digestive)	3
DNAJB2	LoF	Neuronopathy, distal hereditary motor, autosomal recessive 5 (614881) (AR)	Adult onset neurodegenerative disorder (AR ) (Nervous)	1
DNAJB6	LoF	Muscular dystrophy, limb-girdle, autosomal dominant 1 (603511) (AD)	Severe Paediatric Disorders (AD ) (-); Distal myopathies (AD ) (Musculoskeletal/Connective)	1
DNAJC12	LoF	Hyperphenylalaninemia, mild, non-BH4-deficient (617384) (AR)	Severe Paediatric Disorders (AR ) (-); Undiagnosed metabolic disorders (AR ) (Endocrine/Metabolic); Neurotransmitter disorders (AR ) (Nervous); DDG2P (AR ) (Congenital)	3
DNAJC19	LoF	3-methylglutaconic aciduria, type V (610198) (AR)	Severe Paediatric Disorders (AR ) (-); Undiagnosed metabolic disorders (AR ) (Endocrine/Metabolic); Possible mitochondrial disorder - nuclear genes (AR ) (Endocrine/Metabolic); Paediatric or syndromic cardiomyopathy (AR ) (Circulatory); Ataxia and cerebellar anomalies - narrow panel (AR ) (Nervous)	3
DNAJC21	LoF	Bone marrow failure syndrome 3 (617052) (AR)	Severe Paediatric Disorders (AR ) (-); Haematological malignancies cancer susceptibility (AR ) (Neoplasm); Cytopenias and congenital anaemias (AR ) (Blood/Immune); COVID-19 research (AR ) (Blood/Immune)	2
DNAJC3	LoF	Ataxia, combined cerebellar and peripheral, with hearing loss and diabetes mellitus (616192) (AR)	Hereditary neuropathy (AR ) (Nervous); Familial diabetes (AR ) (Endocrine/Metabolic)	2
DNAJC30	LoF	Leber-like hereditary optic neuropathy, autosomal recessive 1 (619382) (AR)	Optic neuropathy (AR ) (Eye)	1
DNAJC5	LoF	Ceroid lipofuscinosis, neuronal, 4 (Kufs type), autosomal dominant (162350) (AD);Ceroid lipofuscinosis, neuronal, 4 (Kufs type), autosomal dominant (162350) (AD)	Severe Paediatric Disorders (AD ) (-); Lysosomal storage disorder (AD ) (Endocrine/Metabolic); Ataxia and cerebellar anomalies - narrow panel (AD ) (Nervous)	2
DNAJC6	LoF	Parkinson disease 19a, juvenile-onset (615528) (AR);Parkinson disease 19b, early-onset (615528) (AR)	Parkinson Disease and Complex Parkinsonism (AR ) (Nervous)	1
DNAL1	LoF	Ciliary dyskinesia, primary, 16 (614017) (AR)	Respiratory ciliopathies including non-CF bronchiectasis (AR ) (Respiratory); Primary ciliary disorders (AR ) (Congenital); Fetal anomalies (AR ) (Congenital)	2
DNASE1L3	LoF	Systemic lupus erythematosus 16 (614420) (AR)	COVID-19 research (AR ) (Blood/Immune)	1
DNASE2	LoF	Autoinflammatory-pancytopenia syndrome (619858) (AR)	Severe Paediatric Disorders (AR ) (-); COVID-19 research (AR ) (Blood/Immune)	1
DNM1	LoF	Developmental and epileptic encephalopathy 31A, autosomal dominant (616346) (AD);Developmental and epileptic encephalopathy 31B, autosomal recessive (620352) (AR)	DDG2P (AD ) (Congenital); Severe Paediatric Disorders (AD ) (-); Early onset or syndromic epilepsy (AD ) (Nervous)	2
DNM1L	LoF	Encephalopathy, lethal, due to defective mitochondrial peroxisomal fission 1 (614388) (AD, AR);Optic atrophy 5 (610708) (AD)	DDG2P (AD ) (Congenital); Severe Paediatric Disorders (AD ) (-); Possible mitochondrial disorder - nuclear genes (AD ) (Endocrine/Metabolic); Peroxisomal disorders (AD ) (Endocrine/Metabolic); Optic neuropathy (AD ) (Eye); Early onset or syndromic epilepsy (AD ) (Nervous)	4
DNM2	LoF	Centronuclear myopathy 1 (160150) (AD);Charcot-Marie-Tooth disease, axonal type 2M (606482) (AD);Charcot-Marie-Tooth disease, dominant intermediate B (606482) (AD);Lethal congenital contracture syndrome 5 (615368) (AR);Centronuclear myopathy 1 (160150) (AD);Charcot-Marie-Tooth disease, axonal type 2M (606482) (AD);Charcot-Marie-Tooth disease, dominant intermediate B (606482) (AD);Lethal congenita…	Fetal anomalies (AD ) (Congenital); Undiagnosed metabolic disorders (AD ) (Endocrine/Metabolic); Severe Paediatric Disorders (AD ) (-); Mitochondrial DNA maintenance disorder (AD ) (Endocrine/Metabolic); Hereditary neuropathy (AD ) (Nervous); Distal myopathies (AD ) (Musculoskeletal/Connective)	4
DNMBP	LoF	Cataract 48 (618415) (AR)	Bilateral congenital or childhood onset cataracts (AR ) (Eye)	1
DNMT1	LoF	Cerebellar ataxia, deafness, and narcolepsy, autosomal dominant (604121) (AD);Neuropathy, hereditary sensory, type IE (614116) (AD)	Severe Paediatric Disorders (AD ) (-); Monogenic hearing loss (AD ) (Ear); Kleine-Levin syndrome (AD ) (Nervous)	2
DNMT3A	LoF+GoF	Acute myeloid leukemia, somatic (601626);Heyn-Sproul-Jackson syndrome (618724) (AD);Tatton-Brown-Rahman syndrome (615879) (AD);Acute myeloid leukemia, somatic (601626);Heyn-Sproul-Jackson syndrome (618724) (AD);Tatton-Brown-Rahman syndrome (615879) (AD);Acute myeloid leukemia, somatic (601626);Heyn-Sproul-Jackson syndrome (618724) (AD);Tatton-Brown-Rahman syndrome (615879) (AD);Acute myeloid leuk…	Beckwith-Wiedemann syndrome BWS and other congenital overgrowth disorders (AD ) (Congenital); Skeletal dysplasia (AD ) (Musculoskeletal/Connective); Severe Paediatric Disorders (AD ) (-); Severe microcephaly (AD ) (Nervous)	3
DNMT3B	LoF	Facioscapulohumeral muscular dystrophy 4, digenic (619478) (DD);Immunodeficiency-centromeric instability-facial anomalies syndrome 1 (242860) (AR);Facioscapulohumeral muscular dystrophy 4, digenic (619478) (DD);Immunodeficiency-centromeric instability-facial anomalies syndrome 1 (242860) (AR)	Severe Paediatric Disorders (AR ) (-); Intellectual disability - microarray and sequencing (AR ) (Nervous); Fetal anomalies (AR ) (Congenital); COVID-19 research (AR ) (Blood/Immune)	3
DOCK2	LoF	Immunodeficiency 40 (616433) (AR)	Severe Paediatric Disorders (AR ) (-); COVID-19 research (AR ) (Blood/Immune)	1
DOCK3	LoF	Neurodevelopmental disorder with impaired intellectual development, hypotonia, and ataxia (618292) (AR)	Severe Paediatric Disorders (AR ) (-); Ataxia and cerebellar anomalies - narrow panel (AR ) (Nervous)	1
DOCK6	LoF	Adams-Oliver syndrome 2 (614219) (AR)	Limb disorders (AR ) (Musculoskeletal/Connective); Structural eye disease (AR ) (Eye); Severe Paediatric Disorders (AR ) (-); Intellectual disability - microarray and sequencing (AR ) (Nervous); Fetal anomalies (AR ) (Congenital)	4
DOCK7	LoF	Developmental and epileptic encephalopathy 23 (615859) (AR)	Severe Paediatric Disorders (AR ) (-); Early onset or syndromic epilepsy (AR ) (Nervous); DDG2P (AR ) (Congenital)	2
DOCK8	LoF	Hyper-IgE syndrome 2, autosomal recessive, with recurrent infections (243700) (AR)	Rare genetic inflammatory skin disorders (AR ) (Skin); Severe Paediatric Disorders (AR ) (-); Severe multi-system atopic disease with high IgE (AR ) (Blood/Immune); Haematological malignancies for rare disease (AR ) (Neoplasm); Gastrointestinal epithelial barrier disorders (AR ) (Digestive); DDG2P (AR ) (Congenital)	5
DOHH	LoF	Neurodevelopmental disorder with microcephaly, cerebral atrophy, and visual impairment (620066) (AR)	Severe microcephaly (AR ) (Nervous); DDG2P (AR ) (Congenital)	2
DOK7	LoF	Fetal akinesia deformation sequence 3 (618389) (AR);Myasthenic syndrome, congenital, 10 (254300) (AR)	Severe Paediatric Disorders (AD ) (-); Other rare neuromuscular disorders (AR ) (Musculoskeletal/Connective); Fetal anomalies (AR ) (Congenital)	2
DOLK	LoF	Congenital disorder of glycosylation, type Im (610768) (AR)	Fetal anomalies (AR ) (Congenital); Severe Paediatric Disorders (AR ) (-); Other rare neuromuscular disorders (AR ) (Musculoskeletal/Connective); Early onset or syndromic epilepsy (AR ) (Nervous); Dilated and arrhythmogenic cardiomyopathy (AR ) (Circulatory); Congenital disorders of glycosylation (AR ) (Endocrine/Metabolic)	5
DONSON	LoF	Microcephaly-micromelia syndrome (251230) (AR);Microcephaly, short stature, and limb abnormalities (617604) (AR)	Severe Paediatric Disorders (AR ) (-); Severe microcephaly (AR ) (Nervous); Fetal anomalies (AR ) (Congenital)	2
DPAGT1	LoF	Congenital disorder of glycosylation, type Ij (608093) (AR);Myasthenic syndrome, congenital, 13, with tubular aggregates (614750) (AR)	Skeletal dysplasia (AR ) (Musculoskeletal/Connective); Severe Paediatric Disorders (AR ) (-); Other rare neuromuscular disorders (AR ) (Musculoskeletal/Connective); Fetal anomalies (AR ) (Congenital); Early onset or syndromic epilepsy (AR ) (Nervous); Congenital disorders of glycosylation (AR ) (Endocrine/Metabolic)	4
DPF2	LoF	Coffin-Siris syndrome 7 (618027) (AD)	DDG2P (AD ) (Congenital); Severe Paediatric Disorders (AD ) (-); Intellectual disability - microarray and sequencing (AD ) (Nervous)	2
DPH1	LoF	Developmental delay with short stature, dysmorphic facial features, and sparse hair (616901) (AR)	Severe Paediatric Disorders (AR ) (-); Intellectual disability - microarray and sequencing (AR ) (Nervous); Fetal anomalies (AR ) (Congenital)	2
DPH5	LoF	Neurodevelopmental disorder with short stature, prominent forehead, and feeding difficulties (620070) (AR)	Early onset or syndromic epilepsy (AR ) (Nervous); DDG2P (AR ) (Congenital)	2
DPM1	LoF	Congenital disorder of glycosylation, type Ie (608799) (AR);Congenital disorder of glycosylation, type Ie (608799) (AR)	Skeletal dysplasia (AR ) (Musculoskeletal/Connective); Severe Paediatric Disorders (AR ) (-); Severe microcephaly (AR ) (Nervous); Fetal anomalies (AR ) (Congenital); Congenital disorders of glycosylation (AR ) (Endocrine/Metabolic)	4
DPM2	LoF	Congenital disorder of glycosylation, type Iu (615042) (AR)	Severe Paediatric Disorders (AR ) (-); Other rare neuromuscular disorders (AR ) (Musculoskeletal/Connective); Intellectual disability - microarray and sequencing (AR ) (Nervous); Fetal anomalies (AR ) (Congenital); Congenital disorders of glycosylation (AR ) (Endocrine/Metabolic)	4
DPM3	LoF	?Muscular dystrophy-dystroglycanopathy (congenital with impaired intellectual development), type B, 15 (618992) (AR);Muscular dystrophy-dystroglycanopathy (limb-girdle), type C, 15 (612937) (AR)	Fetal anomalies (AR ) (Congenital); Severe Paediatric Disorders (AR ) (-); Congenital disorders of glycosylation (AR ) (Endocrine/Metabolic)	2
DPP6	LoF	{Ventricular fibrillation, paroxysmal familial, 2} (612956) (AD);Intellectual developmental disorder, autosomal dominant 33 (616311) (AD)	Severe Paediatric Disorders (AD ) (-); Severe microcephaly (AD ) (Nervous)	1
DPYD	LoF	5-fluorouracil toxicity (274270) (AR);Dihydropyrimidine dehydrogenase deficiency (274270) (AR)	Severe Paediatric Disorders (AR ) (-); White matter disorders and cerebral calcification - narrow panel (AR ) (Nervous); Undiagnosed metabolic disorders (AR ) (Endocrine/Metabolic)	2
DPYS	LoF	Dihydropyrimidinuria (222748) (AR)	Severe Paediatric Disorders (AR ) (-); Undiagnosed metabolic disorders (AR ) (Endocrine/Metabolic); Intellectual disability - microarray and sequencing (AR ) (Nervous)	2
DPYSL5	LoF	Ritscher-Schinzel syndrome 4 (619435) (AD)	DDG2P (AD ) (Congenital); Ataxia and cerebellar anomalies - narrow panel (AD ) (Nervous)	2
DRAM2	LoF	Cone-rod dystrophy 21 (616502) (AR)	Retinal disorders (AR ) (Eye)	1
DRC1	LoF	Ciliary dyskinesia, primary, 21 (615294) (AR);Spermatogenic failure 80 (620222) (AR)	Respiratory ciliopathies including non-CF bronchiectasis (AR ) (Respiratory); Primary ciliary disorders (AR ) (Congenital); DDG2P (AR ) (Congenital)	2
DROSHA	LoF	-	Severe microcephaly (AD ) (Nervous)	1
DRP2	LoF	-	Hereditary neuropathy or pain disorder (XLR ) (Nervous)	1
DSC2	LoF	Arrhythmogenic right ventricular dysplasia 11 (610476) (AD, AR);Arrhythmogenic right ventricular dysplasia 11 with mild palmoplantar keratoderma and woolly hair (610476) (AD, AR)	Arrhythmogenic right ventricular cardiomyopathy (AD ) (Circulatory); Palmoplantar keratoderma and erythrokeratodermas (AR ) (Skin)	2
DSC3	LoF	Hypotrichosis and recurrent skin vesicles (613102) (AR)	Palmoplantar keratodermas (AR ) (Skin)	1
DSE	LoF	Ehlers-Danlos syndrome, musculocontractural type 2 (615539) (AR)	Ehlers Danlos syndrome with a likely monogenic cause (AR ) (Musculoskeletal/Connective)	1
DSG1	LoF	Erythroderma, congenital, with palmoplantar keratoderma, hypotrichosis, and hyper IgE (615508) (AR);Keratosis palmoplantaris striata I, AD (148700) (AD)	Palmoplantar keratoderma and erythrokeratodermas (AD ) (Skin); DDG2P (AR ) (Congenital)	2
DSG2	LoF	Arrhythmogenic right ventricular dysplasia 10 (610193) (AD);Cardiomyopathy, dilated, 1BB (612877) (AR)	Arrhythmogenic right ventricular cardiomyopathy (AD ) (Circulatory)	1
DSG4	LoF	Hypotrichosis 6 (607903) (AR)	Non-syndromic hypotrichosis (AR ) (Skin)	1
DSP	LoF	Arrhythmogenic right ventricular dysplasia 8 (607450) (AD);Cardiomyopathy, dilated, with woolly hair and keratoderma (605676) (AR);Dilated cardiomyopathy with woolly hair, keratoderma, and tooth agenesis (615821) (AD);Epidermolysis bullosa, lethal acantholytic (609638) (AR);Keratosis palmoplantaris striata II (612908) (AD)	DDG2P (AD ) (Congenital); Severe Paediatric Disorders (AD ) (-); Palmoplantar keratoderma and erythrokeratodermas (AD ) (Skin); Arrhythmogenic right ventricular cardiomyopathy (AD ) (Circulatory)	3
DSPP	LoF	Deafness, autosomal dominant 39, with dentinogenesis (605594) (AD);Dentin dysplasia, type II (125420) (AD);Dentinogenesis imperfecta, Shields type II (125490) (AD);Dentinogenesis imperfecta, Shields type III (125500) (AD)	DDG2P (AD ) (Congenital); Severe Paediatric Disorders (AD ) (-); Monogenic hearing loss (AD ) (Ear)	2
DST	LoF	Epidermolysis bullosa simplex 3, localized or generalized intermediate, with bp230 deficiency (615425) (AR);Neuropathy, hereditary sensory and autonomic, type VI (614653) (AR)	Epidermolysis bullosa (AR ) (Skin); Hereditary neuropathy (AR ) (Nervous)	2
DSTYK	LoF	Congenital anomalies of kidney and urinary tract 1 (610805) (AD);Spastic paraplegia 23, autosomal recessive (270750) (AR)	Fetal anomalies (AD ) (Congenital); Unexplained kidney failure in young people (AD ) (Genitourinary); Severe Paediatric Disorders (AD ) (-)	2
DTNBP1	LoF	Hermansky-Pudlak syndrome 7 (614076) (AR)	Severe Paediatric Disorders (AR ) (-); Inherited bleeding disorders (AR ) (Blood/Immune)	1
DTYMK	LoF	Neurodegeneration, childhood-onset, with progressive microcephaly (619847) (AR)	Early onset or syndromic epilepsy (AR ) (Nervous)	1
DUOX2	LoF	Thyroid dyshormonogenesis 6 (607200) (AR)	Congenital hypothyroidism (AD ) (Endocrine/Metabolic); Severe Paediatric Disorders (AR ) (-)	1
DUOXA2	LoF	Thyroid dyshormonogenesis 5 (274900) (AR)	Congenital hypothyroidism (AD ) (Endocrine/Metabolic)	1
DVL1	LoF	Robinow syndrome, autosomal dominant 2 (616331) (AD)	Fetal anomalies (AD ) (Congenital); Severe Paediatric Disorders (AD ) (-); Limb disorders (AD ) (Musculoskeletal/Connective)	2
DVL2	LoF	-	Skeletal dysplasia (AD ) (Musculoskeletal/Connective)	1
DVL3	LoF	Robinow syndrome, autosomal dominant 3 (616894) (AD)	Fetal anomalies (AD ) (Congenital); Severe Paediatric Disorders (AD ) (-); Limb disorders (AD ) (Musculoskeletal/Connective)	2
DYM	LoF	Dyggve-Melchior-Clausen disease (223800) (AR);Smith-McCort dysplasia (607326) (AR)	Skeletal dysplasia (AR ) (Musculoskeletal/Connective); Undiagnosed metabolic disorders (AR ) (Endocrine/Metabolic); Severe Paediatric Disorders (AR ) (-); Intellectual disability - microarray and sequencing (AR ) (Nervous); Fetal anomalies (AR ) (Congenital)	4
DYNC1H1	LoF	Charcot-Marie-Tooth disease, axonal, type 2O (614228) (AD);Cortical dysplasia, complex, with other brain malformations 13 (614563) (AD);Spinal muscular atrophy, lower extremity-predominant 1, AD (158600) (AD)	Fetal anomalies (AD ) (Congenital); Severe Paediatric Disorders (AD ) (-); Other rare neuromuscular disorders (AD ) (Musculoskeletal/Connective); Malformations of cortical development (AD ) (Nervous)	3
DYNC1I2	LoF	Neurodevelopmental disorder with microcephaly and structural brain anomalies (618492) (AR)	Severe microcephaly (AR ) (Nervous); DDG2P (AR ) (Congenital)	2
DYNC2H1	LoF	Short-rib thoracic dysplasia 3 with or without polydactyly (613091) (AR, DR)	Clefting (AR ) (Musculoskeletal/Connective); Unexplained young onset end-stage renal disease (AR ) (Genitourinary); Severe Paediatric Disorders (AR ) (-); Rare multisystem ciliopathy disorders (AR ) (Congenital); Fetal anomalies (AR ) (Congenital)	3
DYNC2I1	LoF	Short-rib thoracic dysplasia 8 with or without polydactyly (615503) (AR)	Thoracic dystrophies (AR ) (Musculoskeletal/Connective); Unexplained young onset end-stage renal disease (AR ) (Genitourinary); Severe Paediatric Disorders (AR ) (-); Rare multisystem ciliopathy disorders (AR ) (Congenital); Fetal anomalies (AR ) (Congenital)	3
DYNC2I2	LoF	Short-rib thoracic dysplasia 11 with or without polydactyly (615633) (AR)	Thoracic dystrophies (AR ) (Musculoskeletal/Connective); Severe Paediatric Disorders (AR ) (-); Rare multisystem ciliopathy disorders (AR ) (Congenital); Fetal anomalies (AR ) (Congenital)	2
DYNC2LI1	LoF	Short-rib thoracic dysplasia 15 with polydactyly (617088) (AR)	Thoracic dystrophies (AR ) (Musculoskeletal/Connective); Severe Paediatric Disorders (AR ) (-); Rare multisystem ciliopathy disorders (AR ) (Congenital); Fetal anomalies (AR ) (Congenital)	2
DYNLT2B	LoF	Short-rib thoracic dysplasia 17 with or without polydactyly (617405) (AR)	Thoracic dystrophies (AR ) (Musculoskeletal/Connective); Severe Paediatric Disorders (AR ) (-); Rare multisystem ciliopathy disorders (AR ) (Congenital); Fetal anomalies (AR ) (Congenital)	2
DYRK1A	LoF	Intellectual developmental disorder, autosomal dominant 7 (614104) (AD)	Fetal anomalies (AD ) (Congenital); Structural eye disease (AD ) (Eye); Severe Paediatric Disorders (AD ) (-); Severe microcephaly (AD ) (Nervous)	3
DYRK1B	LoF+GoF	Abdominal obesity-metabolic syndrome 3 (615812) (AD)	Familial diabetes (AD ) (Endocrine/Metabolic)	1
DYSF	LoF	Miyoshi muscular dystrophy 1 (254130) (AR);Muscular dystrophy, limb-girdle, autosomal recessive 2 (253601) (AR);Myopathy, distal, with anterior tibial onset (606768) (AR)	Severe Paediatric Disorders (AR ) (-); Distal myopathies (AR ) (Musculoskeletal/Connective)	1
DZIP1L	LoF	Polycystic kidney disease 5 (617610) (AR)	Severe Paediatric Disorders (AR ) (-); Fetal anomalies (AR ) (Congenital); Cystic kidney disease (AR ) (Genitourinary)	2
EARS2	LoF	Combined oxidative phosphorylation deficiency 12 (614924) (AR)	Severe Paediatric Disorders (AR ) (-); White matter disorders and cerebral calcification - narrow panel (AR ) (Nervous); Undiagnosed metabolic disorders (AR ) (Endocrine/Metabolic); Possible mitochondrial disorder - nuclear genes (AR ) (Endocrine/Metabolic); Fetal anomalies (AR ) (Congenital)	3
EBF3	LoF	Hypotonia, ataxia, and delayed development syndrome (617330) (AD)	Fetal anomalies (AD ) (Congenital); Severe Paediatric Disorders (AD ) (-); Ataxia and cerebellar anomalies - narrow panel (AD ) (Nervous)	2
EBP	LoF	Chondrodysplasia punctata, X-linked dominant (302960) (XLD);MEND syndrome (300960) (XLR)	DDG2P (XLD ) (Congenital); Undiagnosed metabolic disorders (XLD ) (Endocrine/Metabolic); Skeletal dysplasia (XLD ) (Musculoskeletal/Connective); Severe Paediatric Disorders (XLD ) (-); Palmoplantar keratodermas (XLD ) (Skin); Limb disorders (XLD ) (Musculoskeletal/Connective); Likely inborn error of metabolism - targeted testing not possible (XLD ) (Endocrine/Metabolic); Intellectual disability -…	5
ECEL1	LoF	Arthrogryposis, distal, type 5D (615065) (AR)	Severe Paediatric Disorders (AR ) (-); Fetal anomalies (AR ) (Congenital); Arthrogryposis (AR ) (Musculoskeletal/Connective)	2
ECHS1	LoF	Mitochondrial short-chain enoyl-CoA hydratase 1 deficiency (616277) (AR)	Severe Paediatric Disorders (AR ) (-); Pyruvate dehydrogenase PDH deficiency (AR ) (Endocrine/Metabolic); Possible mitochondrial disorder - nuclear genes (AR ) (Endocrine/Metabolic); Fetal anomalies (AR ) (Congenital); Childhood onset dystonia, chorea or related movement disorder (AR ) (Nervous)	3
ECM1	LoF	Urbach-Wiethe disease (247100) (AR)	Rare genetic inflammatory skin disorders (AR ) (Skin); DDG2P (AR ) (Congenital)	2
EDA	LoF	Ectodermal dysplasia 1, hypohidrotic, X-linked (305100) (XLR);Tooth agenesis, selective, X-linked 1 (313500) (XLD)	DDG2P (XLR ) (Congenital); Severe Paediatric Disorders (XLR ) (-); Ectodermal dysplasia without a known gene mutation (XLR ) (Skin); Ectodermal dysplasia (XLR ) (Skin)	2
EDAR	LoF	[Hair morphology 1, hair thickness] (612630);Ectodermal dysplasia 10A, hypohidrotic/hair/nail type, autosomal dominant (129490) (AD);Ectodermal dysplasia 10B, hypohidrotic/hair/tooth type, autosomal recessive (224900) (AR)	DDG2P (AD ) (Congenital); Severe Paediatric Disorders (AD ) (-); Ectodermal dysplasia (AD ) (Skin)	2
EDARADD	LoF	Ectodermal dysplasia 11A, hypohidrotic/hair/tooth type, autosomal dominant (614940) (AD);Ectodermal dysplasia 11B, hypohidrotic/hair/tooth type, autosomal recessive (614941) (AR)	Ectodermal dysplasia (AD ) (Skin); Severe Paediatric Disorders (AD ) (-)	1
EDEM3	LoF	Congenital disorder of glycosylation, type IIv (619493) (AR)	Intellectual disability - microarray and sequencing (AR ) (Nervous); DDG2P (AR ) (Congenital); Congenital disorders of glycosylation (AR ) (Endocrine/Metabolic)	3
EDN1	LoF	Auriculocondylar syndrome 3 (615706) (AR);Question mark ears, isolated (612798) (AD)	DDG2P (AD ) (Congenital)	1
EDN3	LoF	{Hirschsprung disease, susceptibility to, 4} (613712) (AD);Waardenburg syndrome, type 4B (613265) (AD, AR);{Hirschsprung disease, susceptibility to, 4} (613712) (AD);Waardenburg syndrome, type 4B (613265) (AD, AR)	Pigmentary skin disorders (AD ) (Skin); Monogenic hearing loss (AD ) (Ear); Familial Hirschsprung Disease (AD ) (Digestive)	3
EDNRA	LoF	{Migraine, resistance to} (157300) (AD);Mandibulofacial dysostosis with alopecia (616367) (AD)	Fetal anomalies (AD ) (Congenital); Severe Paediatric Disorders (AD ) (-); Deafness and congenital structural abnormalities (AD ) (Ear); Clefting (AD ) (Musculoskeletal/Connective)	3
EDNRB	LoF	?ABCD syndrome (600501) (AR);{Hirschsprung disease, susceptibility to, 2} (600155) (AD);Waardenburg syndrome, type 4A (277580) (AD, AR)	DDG2P (AD ) (Congenital); Severe Paediatric Disorders (AD ) (-); Pigmentary skin disorders (AD ) (Skin); Monogenic hearing loss (AD ) (Ear); Familial Hirschsprung Disease (AD ) (Digestive)	4
EED	LoF	Cohen-Gibson syndrome (617561) (AD)	Beckwith-Wiedemann syndrome BWS and other congenital overgrowth disorders (AD ) (Congenital); Skeletal dysplasia (AD ) (Musculoskeletal/Connective); Severe Paediatric Disorders (AD ) (-); Intellectual disability - microarray and sequencing (AD ) (Nervous)	3
EEF1A2	LoF	Developmental and epileptic encephalopathy 33 (616409) (AD);Intellectual developmental disorder, autosomal dominant 38 (616393) (AD);Developmental and epileptic encephalopathy 33 (616409) (AD);Intellectual developmental disorder, autosomal dominant 38 (616393) (AD)	DDG2P (AD ) (Congenital); Severe Paediatric Disorders (AD ) (-); Early onset or syndromic epilepsy (AD ) (Nervous)	2
EEF2	LoF	?Spinocerebellar ataxia 26 (609306) (AD)	Hydrocephalus (AD ) (Nervous)	1
EFEMP1	LoF	Cutis laxa, autosomal recessive, type ID (620780) (AR);Doyne honeycomb degeneration of retina (126600) (AD);Glaucoma 1, open angle, H (611276) (AD)	Retinal disorders (AD ) (Eye)	1
EFEMP2	LoF	Cutis laxa, autosomal recessive, type IB (614437) (AR)	Ehlers Danlos syndrome with a likely monogenic cause (AR ) (Musculoskeletal/Connective); Thoracic aortic aneurysm or dissection GMS (AR ) (Circulatory); DDG2P (AR ) (Congenital)	3
EFHC1	LoF	{Epilepsy, juvenile absence, susceptibility to, 1} (607631) (AD);{Myoclonic epilepsy, juvenile, susceptibility to, 1} (254770) (AD)	Severe Paediatric Disorders (AD ) (Nervous)	1
EFL1	LoF	Shwachman-Diamond syndrome 2 (617941) (AR)	COVID-19 research (AR ) (Blood/Immune); Cytopenia - NOT Fanconi anaemia (AR ) (Blood/Immune)	1
EFNB1	LoF	Craniofrontonasal dysplasia (304110) (XLD)	Clefting (XLD ) (Musculoskeletal/Connective); Severe Paediatric Disorders (XLD ) (-); Rare syndromic craniosynostosis or isolated multisuture synostosis (XLD ) (Musculoskeletal/Connective); Fetal anomalies (XLD ) (Congenital); DDG2P (XLD ) (Congenital); Common craniosynostosis syndromes (XLD ) (Musculoskeletal/Connective)	2
EFTUD2	LoF	Mandibulofacial dysostosis, Guion-Almeida type (610536) (AD)	VACTERL-like phenotypes (AD ) (Congenital); Severe Paediatric Disorders (AD ) (-); Severe microcephaly (AD ) (Nervous); Deafness and congenital structural abnormalities (AD ) (Ear); Choanal atresia (AD ) (Musculoskeletal/Connective)	4
EGFR	LoF	{Nonsmall cell lung cancer, susceptibility to} (211980) (AD, SMu);Adenocarcinoma of lung, response to tyrosine kinase inhibitor in (211980) (AD, SMu);Neonatal nephrocutaneous inflammatory syndrome (616069) (AR);Nonsmall cell lung cancer, response to tyrosine kinase inhibitor in (211980) (AD, SMu);{Nonsmall cell lung cancer, susceptibility to} (211980) (AD, SMu);Adenocarcinoma of lung, response to…	Rare genetic inflammatory skin disorders (AR ) (Skin); Intestinal failure or congenital diarrhoea (AR ) (Digestive); COVID-19 research (Unknown ) (Blood/Immune)	3
EGLN1	LoF	[Hemoglobin, high altitude adaptation] (609070) (AD);Erythrocytosis, familial, 3 (609820) (AD)	Hereditary Erythrocytosis (AD ) (Blood/Immune)	1
EGR2	LoF	Charcot-Marie-Tooth disease, type 1D (607678) (AD);Dejerine-Sottas disease (145900) (AD, AR);Hypomyelinating neuropathy, congenital, 1 (605253) (AD, AR);Charcot-Marie-Tooth disease, type 1D (607678) (AD);Dejerine-Sottas disease (145900) (AD, AR);Hypomyelinating neuropathy, congenital, 1 (605253) (AD, AR);Charcot-Marie-Tooth disease, type 1D (607678) (AD);Dejerine-Sottas disease (145900) (AD, AR);…	DDG2P (AR ) (Congenital); Severe Paediatric Disorders (AD ) (-); Hereditary neuropathy (AD ) (Nervous)	2
EHBP1L1	LoF	-	Likely inborn error of metabolism - targeted testing not possible (AR ) (Endocrine/Metabolic); Fetal anomalies (AR ) (Congenital)	2
EHMT1	LoF	Kleefstra syndrome 1 (610253) (AD)	Fetal anomalies (AD ) (Congenital); Severe Paediatric Disorders (AD ) (-); Early onset or syndromic epilepsy (AD ) (Nervous)	2
EIF2AK2	GoF	Dystonia 33 (619687) (AD, AR);Leukoencephalopathy, developmental delay, and episodic neurologic regression syndrome (618877) (AD)	Inherited white matter disorders (AD_GOF ) (Nervous); DDG2P (AD_GOF ) (Congenital)	2
EIF2AK3	LoF	Wolcott-Rallison syndrome (226980) (AR)	Skeletal dysplasia (AR ) (Musculoskeletal/Connective); Severe Paediatric Disorders (AR ) (-); Intellectual disability - microarray and sequencing (AR ) (Nervous); Fetal anomalies (AR ) (Congenital); Diabetes with additional phenotypes suggestive of a monogenic aetiology (AR ) (Endocrine/Metabolic)	4
EIF2AK4	LoF	Pulmonary venoocclusive disease 2 (234810) (AR)	Pulmonary arterial hypertension (AD ) (Circulatory)	1
EIF2B1	LoF	Leukoencephalopathy with vanishing white matter 1, with or without ovarian failure (603896) (AR)	Neonatal diabetes (AD ) (Endocrine/Metabolic); White matter disorders and cerebral calcification - narrow panel (AR ) (Nervous); Severe Paediatric Disorders (AR ) (-)	2
EIF2B2	LoF	Leukoencephalopathy with vanishing white matter 2, with or without ovarian failure (620312) (AR)	Fetal anomalies (AR ) (Congenital); White matter disorders and cerebral calcification - narrow panel (AR ) (Nervous); Severe Paediatric Disorders (AR ) (-); Bilateral congenital or childhood onset cataracts (AR ) (Eye)	3
EIF2B3	LoF	Leukoencephalopathy with vanishing white matter 3, with or without ovarian failure (620313) (AR)	Severe Paediatric Disorders (AR ) (-); White matter disorders and cerebral calcification - narrow panel (AR ) (Nervous); Fetal anomalies (AR ) (Congenital)	2
EIF2B4	LoF	Leukoencephalopathy with vanishing white matter 4, with or without ovarian failure (620314) (AR)	Severe Paediatric Disorders (AR ) (-); White matter disorders and cerebral calcification - narrow panel (AR ) (Nervous); DDG2P (AR ) (Congenital)	2
EIF2B5	LoF	Leukoencephalopathy with vanishing white matter 5, with or without ovarian failure (620315) (AR)	Severe Paediatric Disorders (AR ) (-); White matter disorders and cerebral calcification - narrow panel (AR ) (Nervous); Primary ovarian insufficiency (AR ) (Endocrine/Metabolic); DDG2P (AR ) (Congenital)	3
EIF2S3	LoF	MEHMO syndrome (300148) (XLR)	Clefting (XLR ) (Musculoskeletal/Connective); Severe Paediatric Disorders (XLR ) (-); Severe microcephaly (XLR ) (Nervous); Neonatal diabetes (XLR ) (Endocrine/Metabolic); Intellectual disability - microarray and sequencing (XLR ) (Nervous); Fetal anomalies (XLR ) (Congenital); Early onset or syndromic epilepsy (XLR ) (Nervous); DDG2P (XLR ) (Congenital)	4
EIF3F	LoF	Intellectual developmental disorder, autosomal recessive 67 (618295) (AR)	DDG2P (AR ) (Congenital); Severe Paediatric Disorders (AR ) (-); Early onset or syndromic epilepsy (AR ) (Nervous)	2
EIF4A3	LoF	Robin sequence with cleft mandible and limb anomalies (268305) (AR)	Clefting (AR ) (Musculoskeletal/Connective); Severe Paediatric Disorders (AR ) (-); Intellectual disability - microarray and sequencing (AR ) (Nervous); Fetal anomalies (AR ) (Congenital); Deafness and congenital structural abnormalities (AR ) (Ear)	4
EIF5A	LoF	Faundes-Banka syndrome (619376) (AD)	Severe microcephaly (AD ) (Nervous); Fetal anomalies (AD ) (Congenital)	2
ELAC2	LoF	{Prostate cancer, hereditary, 2, susceptibility to} (614731);Combined oxidative phosphorylation deficiency 17 (615440) (AR)	Fetal anomalies (AR ) (Congenital); Undiagnosed metabolic disorders (AR ) (Endocrine/Metabolic); Severe Paediatric Disorders (AR ) (-); Possible mitochondrial disorder - nuclear genes (AR ) (Endocrine/Metabolic); Intellectual disability - microarray and sequencing (AR ) (Nervous)	3
ELANE	LoF	Neutropenia, cyclic (162800) (AD);Neutropenia, severe congenital 1, autosomal dominant (202700) (AD)	Severe Paediatric Disorders (AD ) (-); Periodic fever syndromes (AD ) (Musculoskeletal/Connective); Haematological malignancies for rare disease (AD ) (Neoplasm); Cytopenias and congenital anaemias (AD ) (Blood/Immune); COVID-19 research (AD ) (Blood/Immune)	3
ELF4	LoF	Autoinflammatory syndrome, familial, X-linked, Behcet-like 2 (301074) (XLR)	Primary immunodeficiency or monogenic inflammatory bowel disease (XLR ) (Blood/Immune)	1
ELMO2	LoF	Vascular malformation, primary intraosseous (606893) (AR);Vascular malformation, primary intraosseous (606893) (AR)	DDG2P (AR ) (Congenital)	1
ELN	LoF	Cutis laxa, autosomal dominant (123700) (AD);Supravalvar aortic stenosis (185500) (AD)	Fetal anomalies (AD ) (Congenital); Thoracic aortic aneurysm or dissection GMS (AD ) (Circulatory); Severe Paediatric Disorders (AD ) (-); Familial non syndromic congenital heart disease (AD ) (Ear); Ehlers Danlos syndrome with a likely monogenic cause (AD ) (Musculoskeletal/Connective)	4
ELOVL1	LoF	Ichthyotic keratoderma, spasticity, hypomyelination, and dysmorphic facies (618527) (AD, AR)	Ichthyosis and erythrokeratoderma (AD ) (Skin); White matter disorders and cerebral calcification - narrow panel (AD ) (Nervous)	2
ELOVL4	LoF	Ichthyosis, spastic quadriplegia, and impaired intellectual development (614457) (AR);Spinocerebellar ataxia 34 (133190) (AD);Stargardt disease 3 (600110) (AD)	Palmoplantar keratodermas (AD ) (Skin); Severe Paediatric Disorders (AD ) (-); Retinal disorders (AD ) (Eye); Fetal anomalies (AR ) (Congenital); Ataxia and cerebellar anomalies - narrow panel (AD ) (Nervous)	4
ELOVL5	LoF	Spinocerebellar ataxia 38 (615957) (AD)	Severe Paediatric Disorders (AD ) (Nervous)	1
ELP1	LoF	{Medulloblastoma} (155255) (AD, AR, SMu);Dysautonomia, familial (223900) (AR);{Medulloblastoma} (155255) (AD, AR, SMu);Dysautonomia, familial (223900) (AR);{Medulloblastoma} (155255) (AD, AR, SMu);Dysautonomia, familial (223900) (AR);{Medulloblastoma} (155255) (AD, AR, SMu);Dysautonomia, familial (223900) (AR)	Childhood solid tumours (AD ) (Neoplasm); Severe Paediatric Disorders (AR ) (-); Familial dysautonomia (AR ) (Nervous)	2
ELP2	LoF	Intellectual developmental disorder, autosomal recessive 58 (617270) (AR)	Severe Paediatric Disorders (AR ) (-); Intellectual disability - microarray and sequencing (AR ) (Nervous)	1
EMC1	LoF	Cerebellar atrophy, visual impairment, and psychomotor retardation (616875) (AR)	DDG2P (AR ) (Congenital); Severe Paediatric Disorders (AD ) (-); Intellectual disability - microarray and sequencing (AD ) (Nervous)	2
EMC10	LoF	Neurodevelopmental disorder with dysmorphic facies and variable seizures (619264) (AR)	DDG2P (AR ) (Congenital); Early onset or syndromic epilepsy (AR ) (Nervous)	2
EMD	LoF	Emery-Dreifuss muscular dystrophy 1, X-linked (310300) (XLR)	Fetal anomalies (XLR ) (Congenital); Severe Paediatric Disorders (XLR ) (-); Progressive cardiac conduction disease (XLR ) (Circulatory); Paediatric or syndromic cardiomyopathy (XLR ) (Circulatory); Other rare neuromuscular disorders (XLR ) (Musculoskeletal/Connective); Limb girdle muscular dystrophies, myofibrillar myopathies and distal myopathies (XLR ) (Musculoskeletal/Connective); Dilated and…	3
EMG1	LoF	Bowen-Conradi syndrome (211180) (AR)	DDG2P (AR ) (Congenital)	1
EML1	LoF	Band heterotopia (600348) (AR)	Severe Paediatric Disorders (AR ) (-); Hydrocephalus (AR ) (Nervous); Fetal anomalies (AR ) (Congenital)	2
EMX2	LoF	Schizencephaly (269160);Schizencephaly (269160);Schizencephaly (269160)	Severe Paediatric Disorders (AD ) (-); Intellectual disability - microarray and sequencing (AD ) (Nervous); Fetal anomalies (AD ) (Congenital)	2
ENAM	LoF	Amelogenesis imperfecta, type IB (104500) (AD);Amelogenesis imperfecta, type IC (204650) (AR)	Amelogenesis imperfecta (AD ) (Musculoskeletal/Connective)	1
ENG	LoF	Telangiectasia, hereditary hemorrhagic, type 1 (187300) (AD)	Cerebral vascular malformations (AD ) (Congenital); Vascular skin disorders (AD ) (Skin); Severe Paediatric Disorders (AD ) (-); Inherited bleeding disorders (AD ) (Blood/Immune); Hereditary haemorrhagic telangiectasia (AD ) (Circulatory)	4
ENO3	LoF	Glycogen storage disease XIII (612932) (AR)	Severe Paediatric Disorders (AR ) (-); Rhabdomyolysis and metabolic muscle disorders (AR ) (Musculoskeletal/Connective); Glycogen storage disease (AR ) (Endocrine/Metabolic)	2
ENPP1	LoF	{Diabetes mellitus, non-insulin-dependent, susceptibility to} (125853) (AD);{Obesity, susceptibility to} (601665) (AD, AR, Mu);Arterial calcification, generalized, of infancy, 1 (208000) (AR);Cole disease (615522) (AD);Hypophosphatemic rickets, autosomal recessive, 2 (613312) (AR);{Diabetes mellitus, non-insulin-dependent, susceptibility to} (125853) (AD);{Obesity, susceptibility to} (601665) (AD…	Palmoplantar keratoderma and erythrokeratodermas (AD ) (Skin); Skeletal dysplasia (AD ) (Musculoskeletal/Connective); Severe Paediatric Disorders (AD ) (-); Hypophosphataemia or rickets (AR ) (Endocrine/Metabolic); Generalised arterial calcification in infancy (AR ) (Circulatory); Fetal anomalies (AR ) (Congenital)	5
ENTPD1	LoF	Spastic paraplegia 64, autosomal recessive (615683) (AR)	Severe Paediatric Disorders (AR ) (-); White matter disorders and cerebral calcification - narrow panel (AR ) (Nervous)	1
EOGT	LoF	Adams-Oliver syndrome 4 (615297) (AR)	Limb disorders (AR ) (Musculoskeletal/Connective); Severe Paediatric Disorders (AR ) (-); Fetal anomalies (AR ) (Congenital); Congenital disorders of glycosylation (AR ) (Endocrine/Metabolic)	3
EP300	LoF	Colorectal cancer, somatic (114500);Menke-Hennekam syndrome 2 (618333) (AD);Rubinstein-Taybi syndrome 2 (613684) (AD);Colorectal cancer, somatic (114500);Menke-Hennekam syndrome 2 (618333) (AD);Rubinstein-Taybi syndrome 2 (613684) (AD);Colorectal cancer, somatic (114500);Menke-Hennekam syndrome 2 (618333) (AD);Rubinstein-Taybi syndrome 2 (613684) (AD);Colorectal cancer, somatic (114500);Menke-Hen…	IUGR and IGF abnormalities (AD ) (Congenital); Severe Paediatric Disorders (AD ) (-); Intellectual disability - microarray and sequencing (AD ) (Nervous)	2
EPAS1	GoF	Erythrocytosis, familial, 4 (611783) (AD)	Hereditary Erythrocytosis (AD_GOF ) (Blood/Immune)	1
EPB41	LoF	Elliptocytosis-1 (611804) (AD, AR)	Severe Paediatric Disorders (AD ) (-); Cytopenias and congenital anaemias (AD ) (Blood/Immune)	1
EPB42	LoF	Spherocytosis, type 5 (612690)	Severe Paediatric Disorders (AR ) (-); Cytopenias and congenital anaemias (AR ) (Blood/Immune)	1
EPCAM	LoF	Diarrhea 5, with tufting enteropathy, congenital (613217) (AR);Lynch syndrome 8 (613244) (AD)	Adult solid tumours for rare disease (AD ) (Neoplasm); Infantile enterocolitis & monogenic inflammatory bowel disease (AR ) (Digestive); DDG2P (AR ) (Congenital)	3
EPG5	LoF	Vici syndrome (242840) (AR)	Clefting (AR ) (Musculoskeletal/Connective); Vici Syndrome and other autophagy disorders (AR ) (Congenital); Undiagnosed metabolic disorders (AR ) (Endocrine/Metabolic); Severe Paediatric Disorders (AR ) (-); Other rare neuromuscular disorders (AR ) (Musculoskeletal/Connective); Early onset or syndromic epilepsy (AR ) (Nervous); Dilated Cardiomyopathy and conduction defects (AR ) (Circulatory); C…	6
EPHA2	LoF	Cataract 6, multiple types (116600) (AD)	Bilateral congenital or childhood onset cataracts (AD ) (Eye)	1
EPHB4	LoF	Capillary malformation-arteriovenous malformation 2 (618196) (AD);Lymphatic malformation 7 (617300) (AD)	Fetal hydrops (AD ) (Congenital); Vascular skin disorders (AD ) (Skin); Severe Paediatric Disorders (AD ) (-); Hereditary haemorrhagic telangiectasia (AD ) (Circulatory)	3
EPM2A	LoF	Myoclonic epilepsy of Lafora 1 (254780) (AR)	Severe Paediatric Disorders (AR ) (-); Glycogen storage disease (AR ) (Endocrine/Metabolic); Ataxia and cerebellar anomalies - narrow panel (AR ) (Nervous)	2
EPO	GoF	?Diamond-Blackfan anemia-like (617911) (AR);{Microvascular complications of diabetes 2} (612623);Erythrocytosis, familial, 5 (617907) (AD)	Hereditary Erythrocytosis (AD_GOF ) (Blood/Immune)	1
EPOR	LoF	[Erythrocytosis, familial, 1] (133100) (AD);[Erythrocytosis, familial, 1] (133100) (AD);[Erythrocytosis, familial, 1] (133100) (AD)	Hereditary Erythrocytosis (AD ) (Blood/Immune)	1
EPRS1	LoF	Leukodystrophy, hypomyelinating, 15 (617951) (AR)	Severe Paediatric Disorders (AR ) (-); White matter disorders and cerebral calcification - narrow panel (AR ) (Nervous); Optic neuropathy (AR ) (Eye); DDG2P (AR ) (Congenital)	3
EPS8	LoF	?Deafness, autosomal recessive 102 (615974) (AR)	Monogenic hearing loss (AR ) (Ear)	1
EPS8L2	LoF	Deafness autosomal recessive 106 (617637) (AR)	Monogenic hearing loss (AR ) (Ear)	1
ERBB3	LoF	?Lethal congenital contractural syndrome 2 (607598) (AR);{?Erythroleukemia, familial, susceptibility to} (133180) (AD);Visceral neuropathy, familial, 1, autosomal recessive (243180) (AR)	Arthrogryposis (AR ) (Musculoskeletal/Connective); Paediatric pseudo-obstruction syndrome (AR ) (Digestive); DDG2P (AR ) (Congenital)	3
ERBB4	LoF	Amyotrophic lateral sclerosis 19 (615515) (AD)	Adult onset neurodegenerative disorder (AD ) (Nervous)	1
ERBIN	LoF	-	COVID-19 research (AD ) (Blood/Immune)	1
ERCC1	LoF	Cerebrooculofacioskeletal syndrome 4 (610758) (AR)	Fetal anomalies (AR ) (Congenital); Xeroderma pigmentosum, Trichothiodystrophy or Cockayne syndrome (AR ) (Skin); Severe Paediatric Disorders (AR ) (-); Intellectual disability - microarray and sequencing (AR ) (Nervous); Childhood solid tumours cancer susceptibility (AR ) (Neoplasm)	4
ERCC2	LoF	?Cerebrooculofacioskeletal syndrome 2 (610756) (AR);Trichothiodystrophy 1, photosensitive (601675) (AR);Xeroderma pigmentosum, group D (278730) (AR)	Xeroderma pigmentosum, Trichothiodystrophy or Cockayne syndrome (AR ) (Skin); Severe Paediatric Disorders (AR ) (-); Intellectual disability - microarray and sequencing (AR ) (Nervous); Fetal anomalies (AR ) (Congenital); Childhood solid tumours (AR ) (Neoplasm); Bilateral congenital or childhood onset cataracts (AR ) (Eye)	5
ERCC3	LoF	Trichothiodystrophy 2, photosensitive (616390) (AR);Xeroderma pigmentosum, group B (610651) (AR)	Xeroderma pigmentosum, Trichothiodystrophy or Cockayne syndrome (AR ) (Skin); Severe Paediatric Disorders (AR ) (-); Intellectual disability - microarray and sequencing (AR ) (Nervous); Fetal anomalies (AR ) (Congenital); Childhood solid tumours (AR ) (Neoplasm); Bilateral congenital or childhood onset cataracts (AR ) (Eye)	5
ERCC4	LoF	Fanconi anemia, complementation group Q (615272) (AR);Xeroderma pigmentosum, group F (278760) (AR);Xeroderma pigmentosum, type F/Cockayne syndrome (278760) (AR);XFE progeroid syndrome (610965) (AR)	Fetal anomalies (AR ) (Congenital); Xeroderma pigmentosum, Trichothiodystrophy or Cockayne syndrome (AR ) (Skin); Severe Paediatric Disorders (AR ) (-); Severe microcephaly (AR ) (Nervous); Radial dysplasia (AR ) (Musculoskeletal/Connective); Haematological malignancies for rare disease (AR ) (Neoplasm); Cytopenias and congenital anaemias (AR ) (Blood/Immune); COVID-19 research (AR ) (Blood/Immun…	6
ERCC5	LoF	Cerebrooculofacioskeletal syndrome 3 (616570) (AR);Xeroderma pigmentosum, group G (278780) (AR);Xeroderma pigmentosum, group G/Cockayne syndrome (278780) (AR)	Xeroderma pigmentosum, Trichothiodystrophy or Cockayne syndrome (AR ) (Skin); Severe Paediatric Disorders (AR ) (-); Intellectual disability - microarray and sequencing (AR ) (Nervous); Fetal anomalies (AR ) (Congenital); Childhood solid tumours (AR ) (Neoplasm); Arthrogryposis (AR ) (Musculoskeletal/Connective)	5
ERCC6	LoF	?De Sanctis-Cacchione syndrome (278800) (AR);{Lung cancer, susceptibility to} (211980) (AD, SMu);{Macular degeneration, age-related, susceptibility to, 5} (613761);Cerebrooculofacioskeletal syndrome 1 (214150) (AR);Cockayne syndrome, type B (133540) (AR);Premature ovarian failure 11 (616946) (AD);UV-sensitive syndrome 1 (600630) (AR);?De Sanctis-Cacchione syndrome (278800) (AR);{Lung cancer, susc…	Severe Paediatric Disorders (AD ) (-); Xeroderma pigmentosum, Trichothiodystrophy or Cockayne syndrome (AR ) (Skin); White matter disorders and cerebral calcification - narrow panel (AR ) (Nervous); IUGR and IGF abnormalities (AR ) (Congenital); Bilateral congenital or childhood onset cataracts (AR ) (Eye); Arthrogryposis (AR ) (Musculoskeletal/Connective)	5
ERCC6L2	LoF	Bone marrow failure syndrome 2 (615715) (AR)	Severe Paediatric Disorders (AR ) (-); Intellectual disability - microarray and sequencing (AR ) (Nervous); Haematological malignancies cancer susceptibility (AR ) (Neoplasm); DDG2P (AR ) (Congenital); Cytopenias and congenital anaemias (AR ) (Blood/Immune); COVID-19 research (AR ) (Blood/Immune)	4
ERCC8	LoF	Cockayne syndrome, type A (216400) (AR);UV-sensitive syndrome 2 (614621) (AR)	Xeroderma pigmentosum, Trichothiodystrophy or Cockayne syndrome (AR ) (Skin); White matter disorders and cerebral calcification - narrow panel (AR ) (Nervous); Severe Paediatric Disorders (AR ) (-); IUGR and IGF abnormalities (AR ) (Congenital); Bilateral congenital or childhood onset cataracts (AR ) (Eye); Arthrogryposis (AR ) (Musculoskeletal/Connective)	5
ERF	LoF	Chitayat syndrome (617180) (AD);Craniosynostosis 4 (600775) (AD)	Fetal anomalies (AD ) (Congenital); Severe Paediatric Disorders (AD ) (-); Hydrocephalus (AD ) (Nervous); Common craniosynostosis syndromes (AD ) (Musculoskeletal/Connective)	3
ERGIC1	LoF	?Arthrogryposis multiplex congenita 2, neurogenic type (208100) (AR)	Arthrogryposis (AR ) (Musculoskeletal/Connective)	1
ERLIN1	LoF	Spastic paraplegia 62, autosomal recessive (615681) (AR)	Severe Paediatric Disorders (AR ) (-); Hereditary spastic paraplegia (AR ) (Nervous)	1
ERLIN2	LoF	Spastic paraplegia 18A, autosomal dominant (620512) (AD);Spastic paraplegia 18B, autosomal recessive (611225) (AR)	Hereditary spastic paraplegia (AD ) (Nervous); Severe Paediatric Disorders (AR ) (-)	1
ESCO2	LoF	Juberg-Hayward syndrome (216100) (AR);Roberts-SC phocomelia syndrome (268300) (AR)	Radial dysplasia (AR ) (Musculoskeletal/Connective); Structural eye disease (AR ) (Eye); Severe Paediatric Disorders (AR ) (-); Intellectual disability - microarray and sequencing (AR ) (Nervous); Fetal anomalies (AR ) (Congenital)	4
ESPN	LoF	?Usher syndrome, type 1M (618632) (AR);Deafness, autosomal recessive 36 (609006) (AR);Deafness, neurosensory, without vestibular involvement, autosomal dominant (609006) (AR)	Monogenic hearing loss (AD ) (Ear)	1
ESRRB	LoF	Deafness, autosomal recessive 35 (608565) (AR)	Severe Paediatric Disorders (AR ) (-); Monogenic hearing loss (AR ) (Ear)	1
ETFA	LoF	Glutaric acidemia IIA (231680) (AR);Glutaric acidemia IIA (231680) (AR);Glutaric acidemia IIA (231680) (AR)	Severe Paediatric Disorders (AR ) (-); Rhabdomyolysis and metabolic muscle disorders (AR ) (Musculoskeletal/Connective); Intellectual disability - microarray and sequencing (AR ) (Nervous); Hyperammonaemia (AR ) (Endocrine/Metabolic); Fetal anomalies (AR ) (Congenital)	4
ETFB	LoF	Glutaric acidemia IIB (231680) (AR);Glutaric acidemia IIB (231680) (AR);Glutaric acidemia IIB (231680) (AR)	Severe Paediatric Disorders (AR ) (-); Rhabdomyolysis and metabolic muscle disorders (AR ) (Musculoskeletal/Connective); Intellectual disability - microarray and sequencing (AR ) (Nervous); Hyperammonaemia (AR ) (Endocrine/Metabolic); Fetal anomalies (AR ) (Congenital)	4
ETFDH	LoF	Glutaric acidemia IIC (231680) (AR);Glutaric acidemia IIC (231680) (AR);Glutaric acidemia IIC (231680) (AR)	Severe Paediatric Disorders (AR ) (-); White matter disorders and cerebral calcification - narrow panel (AR ) (Nervous); Rhabdomyolysis and metabolic muscle disorders (AR ) (Musculoskeletal/Connective); Possible mitochondrial disorder - nuclear genes (AR ) (Endocrine/Metabolic); Hyperammonaemia (AR ) (Endocrine/Metabolic); Fetal anomalies (AR ) (Congenital)	4
ETHE1	LoF	Ethylmalonic encephalopathy (602473) (AR)	Severe Paediatric Disorders (AR ) (-); Undiagnosed metabolic disorders (AR ) (Endocrine/Metabolic); Structural basal ganglia disorders (AR ) (Nervous); Possible mitochondrial disorder - nuclear genes (AR ) (Endocrine/Metabolic); DDG2P (AR ) (Congenital)	3
ETV6	LoF	Leukemia, acute myeloid, somatic (601626);Thrombocytopenia 5 (616216) (AD);Leukemia, acute myeloid, somatic (601626);Thrombocytopenia 5 (616216) (AD);Leukemia, acute myeloid, somatic (601626);Thrombocytopenia 5 (616216) (AD);Leukemia, acute myeloid, somatic (601626);Thrombocytopenia 5 (616216) (AD);Leukemia, acute myeloid, somatic (601626);Thrombocytopenia 5 (616216) (AD);Leukemia, acute myeloid,…	Severe Paediatric Disorders (AD ) (-); Inherited bleeding disorders (AD ) (Blood/Immune); Haematological malignancies for rare disease (AD ) (Neoplasm)	2
EVC	LoF	?Weyers acrofacial dysostosis (193530) (AD);Ellis-van Creveld syndrome (225500) (AR)	Severe Paediatric Disorders (AD ) (-); Skeletal ciliopathies (AR ) (Musculoskeletal/Connective); Rare multisystem ciliopathy disorders (AR ) (Congenital); Neurological ciliopathies (AR ) (Nervous); Fetal anomalies (AR ) (Congenital)	3
EVC2	LoF	Ellis-van Creveld syndrome (225500) (AR);Weyers acrofacial dysostosis (193530) (AD)	Severe Paediatric Disorders (AD ) (-); Skeletal ciliopathies (AR ) (Musculoskeletal/Connective); Rare multisystem ciliopathy disorders (AR ) (Congenital); Neurological ciliopathies (AR ) (Nervous); Fetal anomalies (AR ) (Congenital)	3
EXOC3L2	LoF	-	Fetal anomalies (AR ) (Congenital)	1
EXOSC3	LoF	Pontocerebellar hypoplasia, type 1B (614678) (AR)	Severe Paediatric Disorders (AR ) (-); Other rare neuromuscular disorders (AR ) (Musculoskeletal/Connective); Fetal anomalies (AR ) (Congenital); Ataxia and cerebellar anomalies - narrow panel (AR ) (Nervous)	3
EXOSC8	LoF	Pontocerebellar hypoplasia, type 1C (616081) (AR)	Hereditary ataxia with onset in adulthood (AR ) (Nervous)	1
EXOSC9	LoF	Pontocerebellar hypoplasia, type 1D (618065) (AR)	Hereditary ataxia with onset in adulthood (AR ) (Nervous); DDG2P (AR ) (Congenital)	2
EXPH5	LoF	Epidermolysis bullosa simplex 4, localized or generalized intermediate, autosomal recessive (615028) (AR)	Epidermolysis bullosa (AR ) (Skin); DDG2P (AR ) (Congenital)	2
EXT1	LoF	Chondrosarcoma (215300) (SMu);Exostoses, multiple, type 1 (133700) (AD)	Fetal anomalies (AD ) (Congenital); Skeletal dysplasia (AD ) (Musculoskeletal/Connective); Severe Paediatric Disorders (AD ) (-); Congenital disorders of glycosylation (AD ) (Endocrine/Metabolic); Adult solid tumours for rare disease (AD ) (Neoplasm)	4
EXT2	LoF	Exostoses, multiple, type 2 (133701) (AD);Seizures, scoliosis, and macrocephaly syndrome (616682) (AR)	Fetal anomalies (AD ) (Congenital); Skeletal dysplasia (AD ) (Musculoskeletal/Connective); Severe Paediatric Disorders (AD ) (-); Early onset or syndromic epilepsy (AR ) (Nervous); Congenital disorders of glycosylation (AD ) (Endocrine/Metabolic); Adult solid tumours for rare disease (AD ) (Neoplasm)	5
EXTL3	LoF	Immunoskeletal dysplasia with neurodevelopmental abnormalities (617425) (AR)	Skeletal dysplasia (AR ) (Musculoskeletal/Connective); Severe Paediatric Disorders (AR ) (-); Intellectual disability - microarray and sequencing (AR ) (Nervous); Fetal anomalies (AR ) (Congenital); COVID-19 research (AR ) (Blood/Immune)	4
EYA1	LoF	?Otofaciocervical syndrome (166780) (AD);Anterior segment anomalies with or without cataract (602588) (AD);Branchiootic syndrome 1 (602588) (AD);Branchiootorenal syndrome 1, with or without cataracts (113650) (AD)	Fetal anomalies (AD ) (Congenital); Unexplained kidney failure in young people (AD ) (Genitourinary); Severe Paediatric Disorders (AD ) (-); Deafness and congenital structural abnormalities (AD ) (Ear); Clefting (AD ) (Musculoskeletal/Connective)	4
EYA4	LoF	?Cardiomyopathy, dilated, 1J (605362) (AD);Deafness, autosomal dominant 10 (601316) (AD)	Severe Paediatric Disorders (AD ) (-); Monogenic hearing loss (AD ) (Ear); Dilated Cardiomyopathy and conduction defects (AD ) (Circulatory)	2
EYS	LoF	Retinitis pigmentosa 25 (602772) (AR)	Retinal disorders (AR ) (Eye)	1
EZH2	LoF	Weaver syndrome (277590) (AD)	Beckwith-Wiedemann syndrome BWS and other congenital overgrowth disorders (AD ) (Congenital); Skeletal dysplasia (AD ) (Musculoskeletal/Connective); Severe Paediatric Disorders (AD ) (-); Intellectual disability - microarray and sequencing (AD ) (Nervous); Childhood solid tumours (AD ) (Neoplasm)	4
F10	LoF	Factor X deficiency (227600) (AR)	Severe Paediatric Disorders (AR ) (-); Inherited bleeding disorders (AR ) (Blood/Immune)	1
F11	LoF	Factor XI deficiency, autosomal dominant (612416);Factor XI deficiency, autosomal recessive (612416)	Severe Paediatric Disorders (AD ) (-); Inherited bleeding disorders (AD ) (Blood/Immune)	1
F12	LoF+GoF	Angioedema, hereditary, 3 (610618) (AD);Factor XII deficiency (234000) (AR)	Vascular skin disorders (AD ) (Skin); Severe Paediatric Disorders (AD ) (-); Inherited bleeding disorders (AD ) (Blood/Immune); COVID-19 research (AD ) (Blood/Immune)	2
F13A1	LoF	{Myocardial infarction, protection against} (608446);{Venous thrombosis, protection against} (188050) (AD);Factor XIIIA deficiency (613225) (AR);{Myocardial infarction, protection against} (608446);{Venous thrombosis, protection against} (188050) (AD);Factor XIIIA deficiency (613225) (AR);{Myocardial infarction, protection against} (608446);{Venous thrombosis, protection against} (188050) (AD);Fa…	Inherited bleeding disorders (AD ) (Blood/Immune); Severe Paediatric Disorders (AR ) (-)	1
F13B	LoF	Factor XIIIB deficiency (613235) (AR)	Inherited bleeding disorders (AD ) (Blood/Immune); Severe Paediatric Disorders (AR ) (-)	1
F2	LoF+GoF	{Pregnancy loss, recurrent, susceptibility to, 2} (614390) (AD);{Stroke, ischemic, susceptibility to} (601367) (Mu);Dysprothrombinemia (613679) (AR);Hypoprothrombinemia (613679) (AR);Thrombophilia 1 due to thrombin defect (188050) (AD);{Pregnancy loss, recurrent, susceptibility to, 2} (614390) (AD);{Stroke, ischemic, susceptibility to} (601367) (Mu);Dysprothrombinemia (613679) (AR);Hypoprothrombi…	Severe Paediatric Disorders (AD ) (-); Inherited bleeding disorders (AD ) (Blood/Immune)	1
F5	LoF+GoF	{Budd-Chiari syndrome} (600880) (AR);{Pregnancy loss, recurrent, susceptibility to, 1} (614389) (AD);{Stroke, ischemic, susceptibility to} (601367) (Mu);{Thrombophilia, susceptibility to, due to factor V Leiden} (188055) (AD);Factor V deficiency (227400) (AR);Thrombophilia 2 due to activated protein C resistance (188055) (AD);{Budd-Chiari syndrome} (600880) (AR);{Pregnancy loss, recurrent, suscep…	Inherited bleeding disorders (AD_GOF ) (Blood/Immune); Severe Paediatric Disorders (AR ) (-)	1
F7	LoF	{Myocardial infarction, decreased susceptibility to} (608446);Factor VII deficiency (227500) (AR);{Myocardial infarction, decreased susceptibility to} (608446);Factor VII deficiency (227500) (AR);{Myocardial infarction, decreased susceptibility to} (608446);Factor VII deficiency (227500) (AR);{Myocardial infarction, decreased susceptibility to} (608446);Factor VII deficiency (227500) (AR);{Myocar…	Bleeding and platelet disorders (AD ) (Blood/Immune); Severe Paediatric Disorders (AR ) (-)	1
F8	LoF	Hemophilia A (306700) (XLR);Thrombophilia 13, X-linked, due to factor VIII defect (301071)	Severe Paediatric Disorders (XLR ) (-); Inherited bleeding disorders (XLR ) (Blood/Immune); Factor VIII deficiency (XLR ) (Blood/Immune); Bleeding and platelet disorders (XLR ) (Blood/Immune)	1
F9	LoF+GoF	{Deep venous thrombosis, protection against} (300807) (XLR);{Warfarin sensitivity} (301052) (XL);Hemophilia B (306900) (XLR);Thrombophilia 8, X-linked, due to factor IX defect (300807) (XLR)	Severe Paediatric Disorders (XLR ) (-); Inherited bleeding disorders (XLR ) (Blood/Immune); Factor IX deficiency (XLR ) (Blood/Immune); Bleeding and platelet disorders (XLR ) (Blood/Immune)	1
FA2H	LoF	Spastic paraplegia 35, autosomal recessive (612319) (AR)	Severe Paediatric Disorders (AR ) (-); Undiagnosed metabolic disorders (AR ) (Endocrine/Metabolic); Early onset dystonia (AR ) (Nervous)	2
FAAP24	LoF	-	COVID-19 research (AR ) (Blood/Immune)	1
FADD	LoF	Immunodeficiency 90 with encephalopathy, functional hyposplenia, and hepatic dysfunction (613759) (AR)	Severe Paediatric Disorders (AR ) (-); COVID-19 research (AR ) (Blood/Immune)	1
FAH	LoF	Tyrosinemia, type I (276700) (AR)	Severe Paediatric Disorders (AR ) (-); Undiagnosed metabolic disorders (AR ) (Endocrine/Metabolic); Neonatal cholestasis (AR ) (Digestive); Hereditary neuropathy (AR ) (Nervous); Fetal anomalies (AR ) (Congenital)	4
FAM111A	LoF	Gracile bone dysplasia (602361) (AD);Kenny-Caffey syndrome, type 2 (127000) (AD)	Skeletal dysplasia (AD ) (Musculoskeletal/Connective); Severe Paediatric Disorders (AD ) (-); Intellectual disability - microarray and sequencing (AD ) (Nervous); Fetal anomalies (AD ) (Congenital)	3
FAM111B	LoF	Poikiloderma, hereditary fibrosing, with tendon contractures, myopathy, and pulmonary fibrosis (615704) (AD)	Pigmentary skin disorders (AD ) (Skin); Severe Paediatric Disorders (AD ) (-); Familial pulmonary fibrosis (AD ) (Respiratory)	2
FAM149B1	LoF	Joubert syndrome 36 (618763) (AR)	DDG2P (AR ) (Congenital)	1
FAM161A	LoF	Retinitis pigmentosa 28 (606068) (AR)	Severe Paediatric Disorders (AR ) (-); Retinal disorders (AR ) (Eye); DDG2P (AR ) (Congenital)	2
FAM20A	LoF	Amelogenesis imperfecta, type IG (enamel-renal syndrome) (204690) (AR)	Amelogenesis imperfecta (AR ) (Musculoskeletal/Connective); Severe Paediatric Disorders (AR ) (-); Nephrocalcinosis or nephrolithiasis (AR ) (Genitourinary); Fetal anomalies (AR ) (Congenital)	3
FAM20C	LoF	Raine syndrome (259775) (AR)	Choanal atresia (AR ) (Musculoskeletal/Connective); Severe Paediatric Disorders (AR ) (-); Hypophosphataemia or rickets (AR ) (Endocrine/Metabolic); Hydrocephalus (AR ) (Nervous); Fetal anomalies (AR ) (Congenital); Arthrogryposis (AR ) (Musculoskeletal/Connective)	4
FAM50A	LoF	Intellectual developmental disorder, X-linked syndromic, Armfield type (300261) (XLR)	Intellectual disability - microarray and sequencing (XLR ) (Nervous)	1
FAM83H	LoF	Amelogenesis imperfecta, type IIIA (130900) (AD)	Amelogenesis imperfecta (AD ) (Musculoskeletal/Connective)	1
FAN1	LoF	Interstitial nephritis, karyomegalic (614817) (AR)	Unexplained kidney failure in young people (AR ) (Genitourinary)	1
FANCA	LoF	Fanconi anemia, complementation group A (227650) (AR)	Pigmentary skin disorders (AR ) (Skin); Severe Paediatric Disorders (AR ) (-); Severe microcephaly (AR ) (Nervous); Radial dysplasia (AR ) (Musculoskeletal/Connective); IUGR and IGF abnormalities (AR ) (Congenital); Haematological malignancies for rare disease (AR ) (Neoplasm); Cytopenias and congenital anaemias (AR ) (Blood/Immune); COVID-19 research (AR ) (Blood/Immune)	6
FANCB	LoF	Fanconi anemia, complementation group B (300514) (XLR)	Pigmentary skin disorders (XLR ) (Skin); VACTERL-like phenotypes (XLR ) (Congenital); Severe Paediatric Disorders (XLR ) (-); Severe microcephaly (XLR ) (Nervous); Radial dysplasia (XLR ) (Musculoskeletal/Connective); Non-syndromic familial congenital anorectal malformations (XLR ) (Digestive); Neurofibromatosis Type 1 (XLR ) (Neoplasm); Limb disorders (XLR ) (Musculoskeletal/Connective); IUGR an…	7
FANCC	LoF	Fanconi anemia, complementation group C (227645) (AR)	Pigmentary skin disorders (AR ) (Skin); Severe Paediatric Disorders (AR ) (-); Severe microcephaly (AR ) (Nervous); Radial dysplasia (AR ) (Musculoskeletal/Connective); IUGR and IGF abnormalities (AR ) (Congenital); Haematological malignancies for rare disease (AR ) (Neoplasm); Cytopenias and congenital anaemias (AR ) (Blood/Immune); COVID-19 research (AR ) (Blood/Immune)	6
FANCD2	LoF	Fanconi anemia, complementation group D2 (227646) (AR)	Pigmentary skin disorders (AR ) (Skin); Severe Paediatric Disorders (AR ) (-); Severe microcephaly (AR ) (Nervous); Radial dysplasia (AR ) (Musculoskeletal/Connective); IUGR and IGF abnormalities (AR ) (Congenital); Haematological malignancies for rare disease (AR ) (Neoplasm); Cytopenias and congenital anaemias (AR ) (Blood/Immune); COVID-19 research (AR ) (Blood/Immune)	6
FANCE	LoF	Fanconi anemia, complementation group E (600901) (AR)	Pigmentary skin disorders (AR ) (Skin); Severe Paediatric Disorders (AR ) (-); Severe microcephaly (AR ) (Nervous); Radial dysplasia (AR ) (Musculoskeletal/Connective); IUGR and IGF abnormalities (AR ) (Congenital); Haematological malignancies for rare disease (AR ) (Neoplasm); Cytopenias and congenital anaemias (AR ) (Blood/Immune); COVID-19 research (AR ) (Blood/Immune)	6
FANCF	LoF	Fanconi anemia, complementation group F (603467) (AR)	IUGR and IGF abnormalities (AR ) (Congenital); Severe Paediatric Disorders (AR ) (-); Severe microcephaly (AR ) (Nervous); Radial dysplasia (AR ) (Musculoskeletal/Connective); Pigmentary skin disorders (AR ) (Skin); Haematological malignancies for rare disease (AR ) (Neoplasm); Cytopenias and congenital anaemias (AR ) (Blood/Immune); COVID-19 research (AR ) (Blood/Immune)	6
FANCG	LoF	Fanconi anemia, complementation group G (614082) (AR)	Pigmentary skin disorders (AR ) (Skin); Severe Paediatric Disorders (AR ) (-); Severe microcephaly (AR ) (Nervous); Radial dysplasia (AR ) (Musculoskeletal/Connective); IUGR and IGF abnormalities (AR ) (Congenital); Haematological malignancies for rare disease (AR ) (Neoplasm); Cytopenias and congenital anaemias (AR ) (Blood/Immune); COVID-19 research (AR ) (Blood/Immune)	6
FANCI	LoF	Fanconi anemia, complementation group I (609053) (AR)	Pigmentary skin disorders (AR ) (Skin); Severe Paediatric Disorders (AR ) (-); Severe microcephaly (AR ) (Nervous); Radial dysplasia (AR ) (Musculoskeletal/Connective); IUGR and IGF abnormalities (AR ) (Congenital); Haematological malignancies for rare disease (AR ) (Neoplasm); Cytopenias and congenital anaemias (AR ) (Blood/Immune); COVID-19 research (AR ) (Blood/Immune)	6
FANCL	LoF	Fanconi anemia, complementation group L (614083) (AR)	IUGR and IGF abnormalities (AR ) (Congenital); Severe Paediatric Disorders (AR ) (-); Severe microcephaly (AR ) (Nervous); Radial dysplasia (AR ) (Musculoskeletal/Connective); Pigmentary skin disorders (AR ) (Skin); Haematological malignancies for rare disease (AR ) (Neoplasm); Cytopenias and congenital anaemias (AR ) (Blood/Immune); COVID-19 research (AR ) (Blood/Immune)	6
FANCM	LoF	Premature ovarian failure 15 (618096) (AR);Spermatogenic failure 28 (618086) (AR)	COVID-19 research (AR ) (Blood/Immune); Primary ovarian insufficiency (AR ) (Endocrine/Metabolic); DDG2P (AR ) (Congenital)	3
FAR1	LoF	Cataracts, spastic paraparesis, and speech delay (619338) (AD);Peroxisomal fatty acyl-CoA reductase 1 disorder (616154) (AR)	Childhood onset hereditary spastic paraplegia (AD ) (Nervous); Severe Paediatric Disorders (AR ) (-); Peroxisomal disorders (AR ) (Endocrine/Metabolic); Fetal anomalies (AR ) (Congenital); Bilateral congenital or childhood onset cataracts (AD ) (Eye)	4
FARS2	LoF	Combined oxidative phosphorylation deficiency 14 (614946) (AR);Spastic paraplegia 77, autosomal recessive (617046) (AR)	DDG2P (AR ) (Congenital); Undiagnosed metabolic disorders (AR ) (Endocrine/Metabolic); Severe Paediatric Disorders (AR ) (-); Possible mitochondrial disorder - nuclear genes (AR ) (Endocrine/Metabolic); Hereditary spastic paraplegia (AR ) (Nervous)	3
FARSA	LoF	?Rajab interstitial lung disease with brain calcifications 2 (619013) (AR)	Familial pulmonary fibrosis (AR ) (Respiratory); White matter disorders and cerebral calcification - narrow panel (AR ) (Nervous)	2
FARSB	LoF	Rajab interstitial lung disease with brain calcifications 1 (613658) (AR)	Familial pulmonary fibrosis (AR ) (Respiratory); Intracerebral calcification disorders (AR ) (Nervous)	2
FAS	LoF	{Autoimmune lymphoproliferative syndrome} (601859) (AD);Autoimmune lymphoproliferative syndrome, type IA (601859) (AD);Squamous cell carcinoma, burn scar-related, somatic;{Autoimmune lymphoproliferative syndrome} (601859) (AD);Autoimmune lymphoproliferative syndrome, type IA (601859) (AD);Squamous cell carcinoma, burn scar-related, somatic	Severe Paediatric Disorders (AD ) (-); Haematological malignancies for rare disease (AD ) (Neoplasm); COVID-19 research (AD ) (Blood/Immune); Autoimmune lymphoproliferative syndrome with defective apoptosis (AD ) (Blood/Immune)	2
FASLG	LoF	{Lung cancer, susceptibility to} (211980) (AD, SMu);Autoimmune lymphoproliferative syndrome, type IB (601859) (AD);{Lung cancer, susceptibility to} (211980) (AD, SMu);Autoimmune lymphoproliferative syndrome, type IB (601859) (AD);{Lung cancer, susceptibility to} (211980) (AD, SMu);Autoimmune lymphoproliferative syndrome, type IB (601859) (AD);{Lung cancer, susceptibility to} (211980) (AD, SMu);Au…	Severe Paediatric Disorders (AD ) (-); COVID-19 research (AD ) (Blood/Immune)	1
FASTKD2	LoF	Combined oxidative phosphorylation deficiency 44 (618855) (AR)	Early onset or syndromic epilepsy (AR ) (Nervous); Undiagnosed metabolic disorders (AR ) (Endocrine/Metabolic); Possible mitochondrial disorder - nuclear genes (AR ) (Endocrine/Metabolic)	2
FAT1	LoF	-	Unexplained young onset end-stage renal disease (AR ) (Genitourinary); Anophthalmia or microphthalmia (AR ) (Eye)	2
FAT4	LoF	Hennekam lymphangiectasia-lymphedema syndrome 2 (616006) (AR);Van Maldergem syndrome 2 (615546) (AR)	Severe Paediatric Disorders (AR ) (-); Primary lymphoedema (AR ) (Circulatory); Intestinal failure or congenital diarrhoea (AR ) (Digestive); Intellectual disability - microarray and sequencing (AR ) (Nervous); Fetal anomalies (AR ) (Congenital); COVID-19 research (AR ) (Blood/Immune)	5
FBLN5	LoF	?Cutis laxa, autosomal dominant 2 (614434) (AD);Charcot-Marie-Tooth disease, demyelinating, type 1H (619764) (AD);Cutis laxa, autosomal recessive, type IA (219100) (AR);Macular degeneration, age-related, 3 (608895) (AD)	Ehlers Danlos syndrome with a likely monogenic cause (AD ) (Musculoskeletal/Connective); Thoracic aortic aneurysm or dissection GMS (AD ) (Circulatory); Severe Paediatric Disorders (AD ) (-); Hereditary neuropathy (AD ) (Nervous); Fetal anomalies (AR ) (Congenital)	4
FBN1	LoF	Acromicric dysplasia (102370) (AD);Ectopia lentis, familial (129600) (AD);Geleophysic dysplasia 2 (614185) (AD);Marfan lipodystrophy syndrome (616914) (AD);Marfan syndrome (154700) (AD);MASS syndrome (604308) (AD);Stiff skin syndrome (184900) (AD);Weill-Marchesani syndrome 2, dominant (608328) (AD)	Fetal anomalies (AD ) (Congenital); Thoracic aortic aneurysm or dissection GMS (AD ) (Circulatory); Structural eye disease (AD ) (Eye); Skeletal dysplasia (AD ) (Musculoskeletal/Connective); Severe Paediatric Disorders (AD ) (-); Pneumothorax - familial (AD ) (Respiratory); Lipodystrophy - childhood onset (AD ) (Endocrine/Metabolic)	6
FBN2	LoF	Contractural arachnodactyly, congenital (121050) (AD);Macular degeneration, early-onset (616118) (AD)	DDG2P (AD ) (Congenital); Thoracic aortic aneurysm or dissection GMS (AD ) (Circulatory); Severe Paediatric Disorders (AD ) (-); Ehlers Danlos syndrome with a likely monogenic cause (AD ) (Musculoskeletal/Connective); Arthrogryposis (AD ) (Musculoskeletal/Connective)	3
FBP1	LoF	Fructose-1,6-bisphosphatase deficiency (229700) (AR)	Severe Paediatric Disorders (AR ) (-); Ketotic hypoglycaemia (AR ) (Endocrine/Metabolic); Glycogen storage disease (AR ) (Endocrine/Metabolic); DDG2P (AR ) (Congenital)	2
FBRSL1	LoF	-	Severe microcephaly (AD ) (Nervous)	1
FBXL3	LoF	Intellectual developmental disorder with short stature, facial anomalies, and speech defects (606220) (AR)	Severe Paediatric Disorders (AR ) (-); Intellectual disability - microarray and sequencing (AR ) (Nervous)	1
FBXL4	LoF	Mitochondrial DNA depletion syndrome 13 (encephalomyopathic type) (615471) (AR)	Severe Paediatric Disorders (AR ) (-); Pyruvate dehydrogenase PDH deficiency (AR ) (Endocrine/Metabolic); Mitochondrial DNA maintenance disorder (AR ) (Endocrine/Metabolic); Fetal anomalies (AR ) (Congenital); Ataxia and cerebellar anomalies - narrow panel (AR ) (Nervous)	3
FBXO11	LoF	Intellectual developmental disorder with dysmorphic facies and behavioral abnormalities (618089) (AD)	Rare syndromic craniosynostosis or isolated multisuture synostosis (AD ) (Musculoskeletal/Connective); Severe Paediatric Disorders (AD ) (-); Early onset or syndromic epilepsy (AD ) (Nervous); DDG2P (AD ) (Congenital)	3
FBXO28	LoF	Developmental and epileptic encephalopathy 100 (619777) (AD)	DDG2P (AD ) (Congenital); Early onset or syndromic epilepsy (AD ) (Nervous)	2
FBXO31	LoF	?Intellectual developmental disorder, autosomal recessive 45 (615979) (AR)	Intellectual disability - microarray and sequencing (AD ) (Nervous)	1
FBXO7	LoF	Parkinson disease 15, autosomal recessive (260300) (AR)	Severe Paediatric Disorders (AR ) (-); Parkinson Disease and Complex Parkinsonism (AR ) (Nervous)	1
FBXW11	LoF	Neurodevelopmental, jaw, eye, and digital syndrome (618914) (AD)	DDG2P (AD ) (Congenital); Intellectual disability - microarray and sequencing (AD ) (Nervous)	2
FBXW7	LoF	Developmental delay, hypotonia, and impaired language (620012) (AD)	DDG2P (AD ) (Congenital); Intellectual disability - microarray and sequencing (AD ) (Nervous)	2
FCGR2A	LoF	{Lupus nephritis, susceptibility to} (152700) (AD);{Malaria, severe, susceptibility to} (611162);{Pseudomonas aeruginosa, susceptibility to chronic infection by, in cystic fibrosis} (219700) (AR);{Lupus nephritis, susceptibility to} (152700) (AD);{Malaria, severe, susceptibility to} (611162);{Pseudomonas aeruginosa, susceptibility to chronic infection by, in cystic fibrosis} (219700) (AR);{Lupus …	COVID-19 research (AD ) (Blood/Immune)	1
FCGR3A	LoF	Immunodeficiency 20 (615707) (AR)	Severe Paediatric Disorders (AR ) (-); COVID-19 research (AR ) (Blood/Immune)	1
FCGR3B	LoF	-	Severe Paediatric Disorders (AD ) (Blood/Immune)	1
FCHO1	LoF	Immunodeficiency 76 (619164) (AR)	COVID-19 research (AR ) (Blood/Immune)	1
FCN3	LoF	Immunodeficiency due to ficolin 3 deficiency (613860) (AR)	Severe Paediatric Disorders (AR ) (-); COVID-19 research (AR ) (Blood/Immune)	1
FCSK	LoF	Congenital disorder of glycosylation with defective fucosylation 2 (618324) (AR)	DDG2P (AR ) (Congenital)	1
FDPS	LoF	Porokeratosis 9, multiple types (616631) (AD)	Familial disseminated superficial actinic porokeratosis (AD ) (Skin)	1
FDX2	LoF	Mitochondrial myopathy, episodic, with optic atrophy and reversible leukoencephalopathy (251900) (AR)	Severe Paediatric Disorders (AR ) (-); Undiagnosed metabolic disorders (AR ) (Endocrine/Metabolic); Rhabdomyolysis and metabolic muscle disorders (AR ) (Musculoskeletal/Connective); Possible mitochondrial disorder - nuclear genes (AR ) (Endocrine/Metabolic)	2
FDXR	LoF	Auditory neuropathy and optic atrophy (617717) (AR);Multiple mitochondrial dysfunctions syndrome 9B (620887)	Severe Paediatric Disorders (AR ) (-); Possible mitochondrial disorder - nuclear genes (AR ) (Endocrine/Metabolic); Optic neuropathy (AR ) (Eye); Monogenic hearing loss (AR ) (Ear); Likely inborn error of metabolism - targeted testing not possible (AR ) (Endocrine/Metabolic)	3
FECH	LoF	Protoporphyria, erythropoietic, 1 (177000) (AR)	Cutaneous photosensitivity with a likely genetic cause (AR ) (Skin); Severe Paediatric Disorders (AR ) (-); Erythropoietic protoporphyria, mild variant (AR ) (Endocrine/Metabolic)	2
FEM1C	LoF	-	Ataxia and cerebellar anomalies - narrow panel (AD ) (Nervous)	1
FERMT1	LoF	Kindler syndrome (173650) (AR);Kindler syndrome (173650) (AR)	Epidermolysis bullosa (AR ) (Skin); Infantile enterocolitis & monogenic inflammatory bowel disease (AR ) (Digestive); COVID-19 research (AR ) (Blood/Immune)	3
FERMT3	LoF	Leukocyte adhesion deficiency, type III (612840) (AR)	Skeletal dysplasia (AR ) (Musculoskeletal/Connective); Severe Paediatric Disorders (AR ) (-); Inherited bleeding disorders (AR ) (Blood/Immune); COVID-19 research (AR ) (Blood/Immune)	2
FEZF1	LoF	Hypogonadotropic hypogonadism 22, with or without anosmia (616030) (AR)	Hypogonadotropic hypogonadism (AR ) (Endocrine/Metabolic); DDG2P (AR ) (Congenital)	2
FGA	LoF	Afibrinogenemia, congenital (202400) (AR);Amyloidosis, hereditary systemic 2 (105200) (AD);Dysfibrinogenemia, congenital (616004);Hypodysfibrinogenemia, congenital (616004)	Severe Paediatric Disorders (AD ) (-); Periodic fever syndromes (AD ) (Musculoskeletal/Connective); Inherited bleeding disorders (AD ) (Blood/Immune)	2
FGB	LoF	Afibrinogenemia, congenital (202400) (AR);Dysfibrinogenemia, congenital (616004);Hypofibrinogenemia, congenital (202400) (AR)	Severe Paediatric Disorders (AD ) (-); Inherited bleeding disorders (AD ) (Blood/Immune)	1
FGD1	LoF	Aarskog-Scott syndrome (305400) (XLR);Intellectual developmental disorder, X-linked syndromic 16 (305400) (XLR)	DDG2P (XLR ) (Congenital); Severe Paediatric Disorders (XLR ) (-); Limb disorders (XLR ) (Musculoskeletal/Connective); IUGR and IGF abnormalities (XLR ) (Congenital); Intellectual disability - microarray and sequencing (XLR ) (Nervous); Fetal anomalies (XLR ) (Congenital); Clefting (XLR ) (Musculoskeletal/Connective)	3
FGD4	LoF	Charcot-Marie-Tooth disease, type 4H (609311) (AR)	Severe Paediatric Disorders (AR ) (-); Hereditary neuropathy (AR ) (Nervous)	1
FGF10	LoF	Aplasia of lacrimal and salivary glands (180920) (AD);LADD syndrome 3 (620193) (AD)	VACTERL-like phenotypes (AD ) (Congenital); Severe Paediatric Disorders (AD ) (-); Radial dysplasia (AD ) (Musculoskeletal/Connective); Deafness and congenital structural abnormalities (AD ) (Ear)	3
FGF12	GoF	Developmental and epileptic encephalopathy 47 (617166) (AD)	Severe Paediatric Disorders (AD_GOF ) (-); Early onset or syndromic epilepsy (AD_GOF ) (Nervous); DDG2P (AD_GOF ) (Congenital)	2
FGF13	GoF	Developmental and epileptic encephalopathy 90 (301058) (XLD, XLR);Intellectual developmental disorder, X-linked 110 (301095) (XLR)	Early onset or syndromic epilepsy (XLR_GOF ) (Nervous); DDG2P (XLR_GOF ) (Congenital)	2
FGF14	LoF	Spinocerebellar ataxia 27A (193003) (AD);Spinocerebellar ataxia 27B, late-onset (620174) (AD)	DDG2P (AD ) (Congenital); Severe Paediatric Disorders (AD ) (-); Ataxia and cerebellar anomalies - narrow panel (AD ) (Nervous)	2
FGF16	LoF	Metacarpal 4-5 fusion (309630) (XLR)	Limb disorders (XLR ) (Musculoskeletal/Connective); Skeletal dysplasia (XLR ) (Musculoskeletal/Connective); Severe Paediatric Disorders (XLR ) (-)	1
FGF23	LoF+GoF	Hypophosphatemic rickets, autosomal dominant (193100) (AD);Tumoral calcinosis, hyperphosphatemic, familial, 2 (617993) (AR)	Pigmentary skin disorders (AD_GOF ) (Skin); Skeletal dysplasia (AD_GOF ) (Musculoskeletal/Connective); Severe Paediatric Disorders (AD_GOF ) (-); Hypophosphataemia or rickets (AD_GOF ) (Endocrine/Metabolic); Familial tumoral calcinosis (AR ) (Neoplasm)	4
FGF3	LoF	Deafness, congenital with inner ear agenesis, microtia, and microdontia (610706) (AR)	Severe Paediatric Disorders (AR ) (-); Fetal anomalies (AR ) (Congenital); Deafness and congenital structural abnormalities (AR ) (Ear)	2
FGF8	LoF	Hypogonadotropic hypogonadism 6 with or without anosmia (612702) (AD)	IUGR and IGF abnormalities (AD ) (Congenital); Severe Paediatric Disorders (AD ) (-); Pituitary hormone deficiency (AD ) (Endocrine/Metabolic); Holoprosencephaly - NOT chromosomal (AD ) (Nervous)	3
FGF9	LoF	Multiple synostoses syndrome 3 (612961) (AD)	Skeletal dysplasia (AD ) (Musculoskeletal/Connective); DDG2P (AD ) (Congenital)	2
FGFR1	LoF+GoF	Encephalocraniocutaneous lipomatosis, somatic mosaic (613001);Hartsfield syndrome (615465) (AD);Hypogonadotropic hypogonadism 2 with or without anosmia (147950) (AD);Jackson-Weiss syndrome (123150) (AD);Osteoglophonic dysplasia (166250) (AD);Pfeiffer syndrome (101600) (AD);Trigonocephaly 1 (190440) (AD);Encephalocraniocutaneous lipomatosis, somatic mosaic (613001);Hartsfield syndrome (615465) (AD…	IUGR and IGF abnormalities (AD ) (Congenital); Severe Paediatric Disorders (AD ) (-); Pituitary hormone deficiency (AD ) (Endocrine/Metabolic); Mosaic skin disorders - deep sequencing (AD ) (Skin); Limb disorders (AD ) (Musculoskeletal/Connective); Hydrocephalus (AD ) (Nervous)	5
FGFR2	GoF	?Scaphocephaly, maxillary retrusion, and impaired intellectual development (609579);Antley-Bixler syndrome without genital anomalies or disordered steroidogenesis (207410) (AD);Apert syndrome (101200) (AD);Beare-Stevenson cutis gyrata syndrome (123790) (AD);Bent bone dysplasia syndrome (614592) (AD);Craniofacial-skeletal-dermatologic dysplasia (101600) (AD);Craniosynostosis, nonspecific;Crouzon s…	Fetal anomalies (AD_GOF ) (Congenital); Undiagnosed metabolic disorders (AD_GOF ) (Endocrine/Metabolic); Severe Paediatric Disorders (AD_GOF ) (-); Radial dysplasia (AD_GOF ) (Musculoskeletal/Connective); Hydrocephalus (AD_GOF ) (Nervous); Deafness and congenital structural abnormalities (AD_GOF ) (Ear); Arthrogryposis (AD_GOF ) (Musculoskeletal/Connective)	5
FGFR3	GoF	Achondroplasia (100800) (AD);Bladder cancer, somatic (109800);CATSHL syndrome (610474) (AD, AR);Cervical cancer, somatic (603956);Colorectal cancer, somatic (114500);Crouzon syndrome with acanthosis nigricans (612247) (AD);Hypochondroplasia (146000) (AD);LADD syndrome 2 (620192) (AD);Muenke syndrome (602849) (AD);Nevus, epidermal, somatic (162900);SADDAN (616482) (AD);Spermatocytic seminoma, soma…	Fetal anomalies (AD_GOF ) (Congenital); Severe Paediatric Disorders (AD_GOF ) (-); Radial dysplasia (AD_GOF ) (Musculoskeletal/Connective); Mosaic skin disorders - deep sequencing (AD_GOF ) (Skin); Hydrocephalus (AD_GOF ) (Nervous); Deafness and congenital structural abnormalities (AD_GOF ) (Ear); Arthrogryposis (AD_GOF ) (Musculoskeletal/Connective)	5
FGG	LoF	Afibrinogenemia, congenital (202400) (AR);Dysfibrinogenemia, congenital (616004);Hypodysfibrinogenemia (616004);Hypofibrinogenemia, congenital (202400) (AR)	Severe Paediatric Disorders (AD ) (-); Inherited bleeding disorders (AD ) (Blood/Immune)	1
FH	LoF	Fumarase deficiency (606812) (AR);Leiomyomatosis and renal cell cancer (150800) (AD)	Severe Paediatric Disorders (AD ) (-); Undiagnosed metabolic disorders (AR ) (Endocrine/Metabolic); Possible mitochondrial disorder - nuclear genes (AR ) (Endocrine/Metabolic); Intellectual disability - microarray and sequencing (AR ) (Nervous); Fetal anomalies (AR ) (Congenital); Endometrial cancer pertinent cancer susceptibility (AD ) (Neoplasm)	4
FHL1	LoF	?Uruguay faciocardiomusculoskeletal syndrome (300280) (XLR);Emery-Dreifuss muscular dystrophy 6, X-linked (300696) (XLR);Myopathy, X-linked, with postural muscle atrophy (300696) (XLR);Reducing body myopathy, X-linked 1a, severe, infantile or early childhood onset (300717) (XLD);Reducing body myopathy, X-linked 1b, with late childhood or adult onset (300718) (XL);Scapuloperoneal myopathy, X-linke…	DDG2P (XLR ) (Congenital); Severe Paediatric Disorders (XLR ) (-); Paediatric or syndromic cardiomyopathy (XLR ) (Circulatory); Other rare neuromuscular disorders (XLR ) (Musculoskeletal/Connective); Limb girdle muscular dystrophies, myofibrillar myopathies and distal myopathies (XLR ) (Musculoskeletal/Connective); Hypertrophic cardiomyopathy (XLR ) (Circulatory); Distal myopathies (XLR ) (Muscul…	3
FHOD3	LoF	Cardiomyopathy, familial hypertrophic, 28 (619402) (AD)	Hypertrophic cardiomyopathy (AD ) (Circulatory)	1
FIG4	LoF	?Polymicrogyria, bilateral temporooccipital (612691) (AR);Amyotrophic lateral sclerosis 11 (612577) (AD);Charcot-Marie-Tooth disease, type 4J (611228) (AR);Yunis-Varon syndrome (216340) (AR)	Severe Paediatric Disorders (AD ) (-); Radial dysplasia (AR ) (Musculoskeletal/Connective); Hereditary neuropathy (AD ) (Nervous); Fetal anomalies (AR ) (Congenital); Amyotrophic lateral sclerosis/motor neuron disease (AD ) (Musculoskeletal/Connective)	3
FILIP1	LoF	Neuromuscular disorder, congenital, with dysmorphic facies (620775) (AR)	Arthrogryposis (AR ) (Musculoskeletal/Connective); Intellectual disability - microarray and sequencing (AR ) (Nervous)	2
FITM2	LoF	Siddiqi syndrome (618635) (AR);Siddiqi syndrome (618635) (AR)	Childhood onset dystonia, chorea or related movement disorder (AR ) (Nervous)	1
FKBP10	LoF	Bruck syndrome 1 (259450) (AR);Osteogenesis imperfecta, type XI (610968) (AR)	Skeletal dysplasia (AR ) (Musculoskeletal/Connective); Severe Paediatric Disorders (AR ) (-); Fetal anomalies (AR ) (Congenital); Arthrogryposis (AR ) (Musculoskeletal/Connective)	2
FKBP14	LoF	Ehlers-Danlos syndrome, kyphoscoliotic type, 2 (614557) (AR)	Ehlers Danlos syndrome with a likely monogenic cause (AR ) (Musculoskeletal/Connective); Thoracic aortic aneurysm or dissection GMS (AR ) (Circulatory); Severe Paediatric Disorders (AR ) (-); Other rare neuromuscular disorders (AR ) (Musculoskeletal/Connective); Fetal anomalies (AR ) (Congenital)	3
FKRP	LoF	Muscular dystrophy-dystroglycanopathy (congenital with brain and eye anomalies), type A, 5 (613153) (AR);Muscular dystrophy-dystroglycanopathy (congenital with or without impaired intellectual development), type B, 5 (606612) (AR);Muscular dystrophy-dystroglycanopathy (limb-girdle), type C, 5 (607155) (AR)	Severe Paediatric Disorders (AR ) (-); Rhabdomyolysis and metabolic muscle disorders (AR ) (Musculoskeletal/Connective); Hydrocephalus (AR ) (Nervous); Fetal anomalies (AR ) (Congenital); Congenital disorders of glycosylation (AR ) (Endocrine/Metabolic)	4
FKTN	LoF	Cardiomyopathy, dilated, 1X (611615) (AR);Muscular dystrophy-dystroglycanopathy (congenital with brain and eye anomalies), type A, 4 (253800) (AR);Muscular dystrophy-dystroglycanopathy (congenital without impaired intellectual development), type B, 4 (613152) (AR);Muscular dystrophy-dystroglycanopathy (limb-girdle), type C, 4 (611588) (AR)	Severe Paediatric Disorders (AR ) (-); Structural eye disease (AR ) (Eye); Paediatric or syndromic cardiomyopathy (AR ) (Circulatory); Other rare neuromuscular disorders (AR ) (Musculoskeletal/Connective); Hydrocephalus (AR ) (Nervous); Fetal anomalies (AR ) (Congenital); Congenital disorders of glycosylation (AR ) (Endocrine/Metabolic)	6
FLAD1	LoF	Lipid storage myopathy due to flavin adenine dinucleotide synthetase deficiency (255100) (AR)	Severe Paediatric Disorders (AR ) (-); Rhabdomyolysis and metabolic muscle disorders (AR ) (Musculoskeletal/Connective); Possible mitochondrial disorder - nuclear genes (AR ) (Endocrine/Metabolic); Likely inborn error of metabolism - targeted testing not possible (AR ) (Endocrine/Metabolic); DDG2P (AR ) (Congenital)	3
FLCN	LoF	Birt-Hogg-Dube syndrome (135150) (AD);Colorectal cancer, somatic (114500);Pneumothorax, primary spontaneous (173600) (AD);Renal carcinoma, chromophobe, somatic (144700);Birt-Hogg-Dube syndrome (135150) (AD);Colorectal cancer, somatic (114500);Pneumothorax, primary spontaneous (173600) (AD);Renal carcinoma, chromophobe, somatic (144700);Birt-Hogg-Dube syndrome (135150) (AD);Colorectal cancer, soma…	Multiple monogenic benign skin tumours (AD ) (Skin); Severe Paediatric Disorders (AD ) (-); Renal cancer pertinent cancer susceptibility (AD ) (Neoplasm); Pneumothorax - familial (AD ) (Respiratory); Cystic kidney disease (AD ) (Genitourinary)	4
FLG	LoF	{Dermatitis, atopic, susceptibility to, 2} (605803);Ichthyosis vulgaris (146700) (AD, AR)	Ichthyosis and erythrokeratoderma (AD ) (Skin)	1
FLG2	LoF	Peeling skin syndrome 6 (618084) (AR)	Ichthyosis and erythrokeratoderma (AR ) (Skin)	1
FLI1	LoF	Bleeding disorder, platelet-type, 21 (617443) (AD, AR)	Severe Paediatric Disorders (AD ) (-); Inherited bleeding disorders (AD ) (Blood/Immune)	1
FLNA	LoF+GoF	?FG syndrome 2 (300321) (XL);Cardiac valvular dysplasia, X-linked (314400) (XL);Congenital short bowel syndrome (300048) (XLR);Frontometaphyseal dysplasia 1 (305620) (XLR);Heterotopia, periventricular, 1 (300049) (XLD);Intestinal pseudoobstruction, neuronal (300048) (XLR);Melnick-Needles syndrome (309350) (XLD);Otopalatodigital syndrome, type I (311300) (XLD);Otopalatodigital syndrome, type II (3…	DDG2P (XLD ) (Congenital); Thoracic aortic aneurysm or dissection GMS (XLD ) (Circulatory); Thoracic aortic aneurysm or dissection (XLD ) (Circulatory); Skeletal dysplasia (XLD ) (Musculoskeletal/Connective); Severe Paediatric Disorders (XLD ) (-); Rare syndromic craniosynostosis or isolated multisuture synostosis (XLD ) (Musculoskeletal/Connective); Radial dysplasia (XLD ) (Musculoskeletal/Conne…	7
FLNB	LoF	Atelosteogenesis, type I (108720) (AD);Atelosteogenesis, type III (108721) (AD);Boomerang dysplasia (112310) (AD);Larsen syndrome (150250) (AD);Spondylocarpotarsal synostosis syndrome (272460) (AR)	Fetal anomalies (AD ) (Congenital); Skeletal dysplasia (AD ) (Musculoskeletal/Connective); Severe Paediatric Disorders (AD ) (-); Arthrogryposis (AD ) (Musculoskeletal/Connective)	2
FLNC	LoF	Arrhythmogenic right ventricular dysplasia, familial (617047) (AD);Cardiomyopathy, familial hypertrophic, 26 (617047) (AD);Cardiomyopathy, familial restrictive 5 (617047) (AD);Myopathy, distal, 4 (614065) (AD);Myopathy, myofibrillar, 5 (609524) (AD)	Fetal anomalies (AD ) (Congenital); Severe Paediatric Disorders (AD ) (-); Hypertrophic cardiomyopathy (AD ) (Circulatory); Distal myopathies (AD ) (Musculoskeletal/Connective)	3
FLT4	LoF	Congenital heart defects, multiple types, 7 (618780) (AD);Hemangioma, capillary infantile, somatic (602089);Lymphatic malformation 1 (153100) (AD);Congenital heart defects, multiple types, 7 (618780) (AD);Hemangioma, capillary infantile, somatic (602089);Lymphatic malformation 1 (153100) (AD);Congenital heart defects, multiple types, 7 (618780) (AD);Hemangioma, capillary infantile, somatic (60208…	Fetal hydrops (AD ) (Congenital); Vascular skin disorders (AD ) (Skin); Severe Paediatric Disorders (AD ) (-); Primary lymphoedema (AD ) (Circulatory)	3
FLVCR1	LoF	Ataxia, posterior column, with retinitis pigmentosa (609033) (AR)	Severe Paediatric Disorders (AR ) (-); Retinal disorders (AR ) (Eye); DDG2P (AR ) (Congenital); Ataxia and cerebellar anomalies - narrow panel (AR ) (Nervous)	3
FLVCR2	LoF	Proliferative vasculopathy and hydranencephaly-hydrocephaly syndrome (225790) (AR)	Severe Paediatric Disorders (AR ) (-); Hydrocephalus (AR ) (Nervous); Fetal anomalies (AR ) (Congenital)	2
FMN2	LoF	Intellectual developmental disorder, autosomal recessive 47 (616193) (AR)	Severe Paediatric Disorders (AR ) (-); Intellectual disability - microarray and sequencing (AR ) (Nervous); DDG2P (AR ) (Congenital)	2
FMO3	LoF	Trimethylaminuria (602079) (AR)	Severe Paediatric Disorders (AR ) (-); Undiagnosed metabolic disorders (AR ) (Endocrine/Metabolic)	1
FMR1	LoF	Fragile X syndrome (300624) (XLD);Fragile X tremor/ataxia syndrome (300623) (XLD);Premature ovarian failure 1 (311360) (XL)	DDG2P (XLD ) (Congenital); Severe Paediatric Disorders (XLD ) (-); Intellectual disability - microarray and sequencing (XLD ) (Nervous)	2
FN1	LoF	Glomerulopathy with fibronectin deposits 2 (601894) (AD);Spondylometaphyseal dysplasia, corner fracture type (184255) (AD)	DDG2P (AD ) (Congenital); Skeletal dysplasia (AD ) (Musculoskeletal/Connective); Severe Paediatric Disorders (AD ) (-); Proteinuric renal disease (AD ) (Genitourinary)	3
FNIP1	LoF	Immunodeficiency 93 and hypertrophic cardiomyopathy (619705) (AR)	Primary immunodeficiency or monogenic inflammatory bowel disease (AR ) (Blood/Immune)	1
FOLR1	LoF	Neurodegeneration due to cerebral folate transport deficiency (613068) (AR)	Severe Paediatric Disorders (AR ) (-); Neurotransmitter disorders (AR ) (Nervous); Fetal anomalies (AR ) (Congenital); Cerebral folate deficiency (AR ) (Endocrine/Metabolic)	3
FOXA2	LoF	-	Pituitary hormone deficiency (AD ) (Endocrine/Metabolic)	1
FOXC1	LoF	Anterior segment dysgenesis 3, multiple subtypes (601631) (AD);Axenfeld-Rieger syndrome, type 3 (602482) (AD)	Fetal anomalies (AD ) (Congenital); Severe Paediatric Disorders (AD ) (-); Glaucoma developmental (AD ) (Eye); Familial cerebral small vessel disease (AD ) (Nervous)	3
FOXC2	LoF+GoF	Lymphedema-distichiasis syndrome (153400) (AD);Lymphedema-distichiasis syndrome with renal disease and diabetes mellitus (153400) (AD)	Vascular skin disorders (AD ) (Skin); Severe Paediatric Disorders (AD ) (-); Primary lymphoedema (AD ) (Circulatory); Fetal hydrops (AD ) (Congenital); Clefting (AD ) (Musculoskeletal/Connective)	4
FOXD3	LoF	{Autoimmune disease, susceptibility to, 1} (607836) (AD)	Structural eye disease (AD ) (Eye)	1
FOXE1	LoF	{Thyroid cancer, nonmedullary, 4} (616534) (AD);Bamforth-Lazarus syndrome (241850) (AR)	Choanal atresia (AR ) (Musculoskeletal/Connective); Severe Paediatric Disorders (AR ) (-); Fetal anomalies (AR ) (Congenital); Congenital hypothyroidism (AR ) (Endocrine/Metabolic)	3
FOXE3	LoF	{Aortic aneurysm, familial thoracic 11, susceptibility to} (617349) (AD);Anterior segment dysgenesis 2, multiple subtypes (610256) (AR);Cataract 34, multiple types (612968)	Fetal anomalies (AD ) (Congenital); Severe Paediatric Disorders (AD ) (-); Bilateral congenital or childhood onset cataracts (AD ) (Eye)	2
FOXF1	LoF	Alveolar capillary dysplasia with misalignment of pulmonary veins (265380) (AD)	Severe Paediatric Disorders (AD ) (-); Non-syndromic familial congenital anorectal malformations (AD ) (Digestive); Fetal anomalies (AD ) (Congenital); Alveolar capillary dysplasia with misalignment of pulmonary veins (AD ) (Respiratory)	3
FOXG1	LoF	Rett syndrome, congenital variant (613454) (AD)	Fetal anomalies (AD ) (Congenital); Severe Paediatric Disorders (AD ) (-); Early onset dystonia (AD ) (Nervous)	2
FOXI1	LoF	Enlarged vestibular aqueduct (600791) (AR);Enlarged vestibular aqueduct (600791) (AR);Enlarged vestibular aqueduct (600791) (AR)	Monogenic hearing loss (AR ) (Ear)	1
FOXI3	LoF	Craniofacial microsomia 2 (620444) (AD, AR)	Deafness and congenital structural abnormalities (AD ) (Ear); Paediatric disorders - additional genes (AD ) (-)	1
FOXJ1	LoF	Ciliary dyskinesia, primary, 43 (618699) (AD)	Laterality disorders and isomerism (AD ) (Congenital)	1
FOXL2	LoF	Blepharophimosis, epicanthus inversus, and ptosis, type 1 (110100) (AD, AR);Blepharophimosis, epicanthus inversus, and ptosis, type 2 (110100) (AD, AR);Premature ovarian failure 3 (608996) (AD)	Blepharophimosis ptosis and epicanthus inversus (AD ) (Eye); Primary ovarian insufficiency (AD ) (Endocrine/Metabolic); Paediatric disorders - additional genes (AD ) (-); DDG2P (AD ) (Congenital)	3
FOXN1	LoF	T-cell immunodeficiency, congenital alopecia, and nail dystrophy (601705) (AR);T-cell lymphopenia, infantile, with or without nail dystrophy, autosomal dominant (618806) (AD)	COVID-19 research (AD ) (Blood/Immune); Severe Paediatric Disorders (AR ) (-); DDG2P (AR ) (Congenital)	2
FOXP1	LoF	Intellectual developmental disorder with language impairment with or without autistic features (613670) (AD)	DDG2P (AD ) (Congenital); Severe Paediatric Disorders (AD ) (-); Intellectual disability - microarray and sequencing (AD ) (Nervous)	2
FOXP2	LoF	Speech-language disorder-1 (602081) (AD)	DDG2P (AD ) (Congenital); Structural basal ganglia disorders (AD ) (Nervous); Severe Paediatric Disorders (AD ) (-)	2
FOXP3	LoF	Immunodysregulation, polyendocrinopathy, and enteropathy, X-linked (304790) (XLR)	DDG2P (XLR ) (Congenital); Severe Paediatric Disorders (XLR ) (-); Primary immunodeficiency or monogenic inflammatory bowel disease (XLR ) (Blood/Immune); Neonatal diabetes (XLR ) (Endocrine/Metabolic); Multi-organ autoimmune diabetes (XLR ) (Endocrine/Metabolic); IPEX - Immunodysregulation Polyendocrinopathy and Enteropathy, X-Linked (XLR ) (Blood/Immune); Intestinal failure or congenital diarrh…	4
FOXP4	LoF	-	Paediatric disorders - additional genes (AD ) (Congenital)	1
FOXRED1	LoF	Mitochondrial complex I deficiency, nuclear type 19 (618241) (AR)	Severe Paediatric Disorders (AR ) (-); Undiagnosed metabolic disorders (AR ) (Endocrine/Metabolic); Mitochondrial disorder with complex I deficiency (AR ) (Endocrine/Metabolic); Fetal anomalies (AR ) (Congenital); Early onset or syndromic epilepsy (AR ) (Nervous)	3
FPR1	LoF	-	COVID-19 research (AR ) (Blood/Immune)	1
FRA10AC1	LoF	Neurodevelopmental disorder with growth retardation, dysmorphic facies, and corpus callosum abnormalities (620113) (AR)	DDG2P (AR ) (Congenital)	1
FRAS1	LoF	Fraser syndrome 1 (219000) (AR)	Limb disorders (AR ) (Musculoskeletal/Connective); Unexplained kidney failure in young people (AR ) (Genitourinary); Severe Paediatric Disorders (AR ) (-); Fetal anomalies (AR ) (Congenital); Deafness and congenital structural abnormalities (AR ) (Ear); Anophthalmia or microphthalmia (AR ) (Eye)	5
FREM1	LoF	Bifid nose with or without anorectal and renal anomalies (608980) (AR);Manitoba oculotrichoanal syndrome (248450) (AR);Trigonocephaly 2 (614485) (AD)	Severe Paediatric Disorders (AD ) (-); Unexplained kidney failure in young people (AR ) (Genitourinary); Fetal anomalies (AR ) (Congenital); Anophthalmia or microphthalmia (AR ) (Eye)	3
FREM2	LoF	Cryptophthalmos, unilateral or bilateral, isolated (123570) (AR);Fraser syndrome 2 (617666) (AR)	Limb disorders (AR ) (Musculoskeletal/Connective); Unexplained kidney failure in young people (AR ) (Genitourinary); Severe Paediatric Disorders (AR ) (-); Fetal anomalies (AR ) (Congenital); Deafness and congenital structural abnormalities (AR ) (Ear); Anophthalmia or microphthalmia (AR ) (Eye)	5
FRMD4A	LoF	?Corpus callosum, agenesis of, with facial anomalies and cerebellar ataxia (616819) (AR)	Fetal anomalies (AR ) (Congenital)	1
FRMD5	LoF	Neurodevelopmental disorder with eye movement abnormalities and ataxia (620094) (AD)	DDG2P (AD ) (Congenital); Ataxia and cerebellar anomalies - narrow panel (AD ) (Nervous)	2
FRMD7	LoF	Nystagmus 1, congenital, X-linked (310700) (XL);Nystagmus, infantile periodic alternating, X-linked (310700) (XL)	Albinism or congenital nystagmus (XLD ) (Skin); Severe Paediatric Disorders (XLD ) (-); Infantile nystagmus (XLD ) (Eye)	2
FRMPD4	LoF	Intellectual developmental disorder, X-linked 104 (300983) (XL)	DDG2P (XLR ) (Congenital); Severe Paediatric Disorders (XLR ) (-); Intellectual disability - microarray and sequencing (XLR ) (Nervous)	2
FRRS1L	LoF	Developmental and epileptic encephalopathy 37 (616981) (AR)	Severe Paediatric Disorders (AR ) (-); Early onset or syndromic epilepsy (AR ) (Nervous); DDG2P (AR ) (Congenital)	2
FSHB	LoF	Hypogonadotropic hypogonadism 24 without anosmia (229070) (AR)	Primary ovarian insufficiency (AR ) (Endocrine/Metabolic)	1
FSHR	LoF	Ovarian dysgenesis 1 (233300) (AR);Ovarian hyperstimulation syndrome (608115) (AD)	Primary ovarian insufficiency (AR ) (Endocrine/Metabolic)	1
FTCD	LoF	Glutamate formiminotransferase deficiency (229100) (AR)	Severe Paediatric Disorders (AR ) (-); Undiagnosed metabolic disorders (AR ) (Endocrine/Metabolic); Intellectual disability - microarray and sequencing (AR ) (Nervous); DDG2P (AR ) (Congenital)	3
FTL	LoF+GoF	Hyperferritinemia-cataract syndrome (600886) (AD);L-ferritin deficiency, dominant and recessive (615604) (AD, AR);Neurodegeneration with brain iron accumulation 3 (606159) (AD)	Fetal anomalies (AD ) (Congenital); Severe Paediatric Disorders (AD ) (-); Parkinson Disease and Complex Parkinsonism (AD ) (Nervous); Iron metabolism disorders - NOT common HFE mutations (AD ) (Endocrine/Metabolic); Bilateral congenital or childhood onset cataracts (AD ) (Eye)	4
FTSJ1	LoF	Intellectual developmental disorder, X-linked 9 (309549) (XLR)	DDG2P (XLR ) (Congenital); Severe Paediatric Disorders (XLR ) (-); Intellectual disability - microarray and sequencing (XLR ) (Nervous)	2
FUCA1	LoF	Fucosidosis (230000) (AR)	Skeletal dysplasia (AR ) (Musculoskeletal/Connective); White matter disorders and cerebral calcification - narrow panel (AR ) (Nervous); Severe Paediatric Disorders (AR ) (-); Lysosomal storage disorder (AR ) (Endocrine/Metabolic); DDG2P (AR ) (Congenital)	4
FUS	LoF+GoF	Amyotrophic lateral sclerosis 6, with or without frontotemporal dementia (608030);Essential tremor, hereditary, 4 (614782) (AD)	Amyotrophic lateral sclerosis/motor neuron disease (AD ) (Musculoskeletal/Connective); Adult onset neurodegenerative disorder (AD ) (Nervous)	2
FUT8	LoF	Congenital disorder of glycosylation with defective fucosylation 1 (618005) (AR)	Severe Paediatric Disorders (AR ) (-); Fetal anomalies (AR ) (Congenital); Early onset or syndromic epilepsy (AR ) (Nervous); Congenital disorders of glycosylation (AR ) (Endocrine/Metabolic)	3
FXN	LoF	Friedreich ataxia (229300) (AR);Friedreich ataxia with retained reflexes (229300) (AR)	Severe Paediatric Disorders (AR ) (-); Undiagnosed metabolic disorders (AR ) (Endocrine/Metabolic); Ataxia and cerebellar anomalies - narrow panel (AR ) (Nervous)	2
FXR1	LoF	?Congenital myopathy 9A with respiratory insufficiency and bone fractures (618822) (AR);Congenital myopathy 9B, proximal, with minicore lesions (618823) (AR)	Congenital myopathy (AR ) (Musculoskeletal/Connective); DDG2P (AR ) (Congenital)	2
FYB1	LoF	Thrombocytopenia 3 (273900) (AR)	Severe Paediatric Disorders (AR ) (-); Inherited bleeding disorders (AR ) (Blood/Immune)	1
FYCO1	LoF	Cataract 18, autosomal recessive (610019) (AR)	Fetal anomalies (AR ) (Congenital); Severe Paediatric Disorders (AR ) (-); Bilateral congenital or childhood onset cataracts (AR ) (Eye)	2
FZD2	LoF	Omodysplasia 2 (164745) (AD)	Limb disorders (AD ) (Musculoskeletal/Connective); Severe Paediatric Disorders (AD ) (-); Fetal anomalies (AD ) (Congenital)	2
FZD4	LoF	Exudative vitreoretinopathy 1 (133780) (AD);Retinopathy of prematurity (133780) (AD)	Retinal disorders (AD ) (Eye)	1
FZD5	LoF	Microphthalmia/coloboma 11 (620731) (AD)	Ocular coloboma (AD ) (Eye); DDG2P (AD ) (Congenital)	2
FZD6	LoF	Nail disorder, nonsyndromic congenital, 1 (161050) (AR)	Severe Paediatric Disorders (AR ) (-); DDG2P (AR ) (Congenital)	1
FZR1	LoF	Developmental and epileptic encephalopathy 109 (620145) (AD)	DDG2P (AD ) (Congenital)	1
G6PC1	LoF	Glycogen storage disease Ia (232200) (AR)	Severe Paediatric Disorders (AR ) (-); Ketotic hypoglycaemia (AR ) (Endocrine/Metabolic); Glycogen storage disease (AR ) (Endocrine/Metabolic)	1
G6PC3	LoF	Dursun syndrome (612541) (AR);Neutropenia, severe congenital 4, autosomal recessive (612541) (AR)	Severe Paediatric Disorders (AR ) (-); Infantile enterocolitis & monogenic inflammatory bowel disease (AR ) (Digestive); Fetal anomalies (AR ) (Congenital); Cytopenias and congenital anaemias (AR ) (Blood/Immune); COVID-19 research (AR ) (Blood/Immune); Congenital disorders of glycosylation (AR ) (Endocrine/Metabolic)	4
G6PD	LoF	{Resistance to malaria due to G6PD deficiency} (611162);Hemolytic anemia, G6PD deficient (favism) (300908) (XL);{Resistance to malaria due to G6PD deficiency} (611162);Hemolytic anemia, G6PD deficient (favism) (300908) (XL);{Resistance to malaria due to G6PD deficiency} (611162);Hemolytic anemia, G6PD deficient (favism) (300908) (XL);{Resistance to malaria due to G6PD deficiency} (611162);Hemolyt…	Severe Paediatric Disorders (XLR ) (-); Rare anaemia (XLR ) (Blood/Immune); Primary immunodeficiency or monogenic inflammatory bowel disease (XLR ) (Blood/Immune); Cytopenias and congenital anaemias (XLR ) (Blood/Immune); COVID-19 research (XLR ) (Blood/Immune)	1
GAA	LoF	Glycogen storage disease II (232300) (AR)	Severe Paediatric Disorders (AR ) (-); Rhabdomyolysis and metabolic muscle disorders (AR ) (Musculoskeletal/Connective); Paediatric or syndromic cardiomyopathy (AR ) (Circulatory); Glycogen storage disease (AR ) (Endocrine/Metabolic); Fetal anomalies (AR ) (Congenital)	4
GABBR1	LoF	Neurodevelopmental disorder with language delay and variable cognitive abnormalities (620502) (AD)	DDG2P (AD ) (Congenital)	1
GABBR2	LoF	{Nicotine dependence, protection against} (188890);{Nicotine dependence, susceptibility to} (188890);Developmental and epileptic encephalopathy 59 (617904) (AD);Neurodevelopmental disorder with poor language and loss of hand skills (617903) (AD);{Nicotine dependence, protection against} (188890);{Nicotine dependence, susceptibility to} (188890);Developmental and epileptic encephalopathy 59 (61790…	DDG2P (AD ) (Congenital); Severe Paediatric Disorders (AD ) (-); Early onset or syndromic epilepsy (AD ) (Nervous)	2
GABRA1	LoF	{Epilepsy, childhood absence, susceptibility to, 4} (611136);{Epilepsy, juvenile myoclonic, susceptibility to, 5} (611136);Developmental and epileptic encephalopathy 19 (615744) (AD)	DDG2P (AD ) (Congenital); Severe Paediatric Disorders (AD ) (-); Early onset or syndromic epilepsy (AD ) (Nervous)	2
GABRA2	LoF	{Alcohol dependence, susceptibility to} (103780) (Mu);Developmental and epileptic encephalopathy 78 (618557) (AD);{Alcohol dependence, susceptibility to} (103780) (Mu);Developmental and epileptic encephalopathy 78 (618557) (AD)	Severe Paediatric Disorders (AD ) (-); Early onset or syndromic epilepsy (AD ) (Nervous)	1
GABRA5	LoF	Developmental and epileptic encephalopathy 79 (618559) (AD)	Early onset or syndromic epilepsy (AD ) (Nervous)	1
GABRB1	LoF	Developmental and epileptic encephalopathy 45 (617153) (AD)	Early onset or syndromic epilepsy (AD ) (Nervous)	1
GABRB2	LoF+GoF	Developmental and epileptic encephalopathy 92 (617829) (AD)	DDG2P (AD ) (Congenital); Severe Paediatric Disorders (AD ) (-); Early onset or syndromic epilepsy (AD ) (Nervous)	2
GABRB3	LoF+GoF	{Epilepsy, childhood absence, susceptibility to, 5} (612269);Developmental and epileptic encephalopathy 43 (617113) (AD)	DDG2P (AD ) (Congenital); Severe Paediatric Disorders (AD ) (-); Early onset or syndromic epilepsy (AD ) (Nervous)	2
GABRD	LoF	{?Generalized epilepsy with febrile seizures plus, type 5, susceptibility to} (613060) (AD)	Early onset or syndromic epilepsy (AD ) (Nervous)	1
GABRG2	LoF	Developmental and epileptic encephalopathy 74 (618396) (AD);Febrile seizures, familial, 8 (607681) (AD);Generalized epilepsy with febrile seizures plus, type 3 (607681) (AD)	DDG2P (AD ) (Congenital); Undiagnosed metabolic disorders (AD ) (Endocrine/Metabolic); Severe Paediatric Disorders (AD ) (-); Early onset or syndromic epilepsy (AD ) (Nervous)	3
GAD1	LoF	Developmental and epileptic encephalopathy 89 (619124) (AR)	Early onset or syndromic epilepsy (AR ) (Nervous)	1
GALC	LoF	Krabbe disease (245200) (AR)	Severe Paediatric Disorders (AR ) (-); White matter disorders and cerebral calcification - narrow panel (AR ) (Nervous); Lysosomal storage disorder (AR ) (Endocrine/Metabolic); Fetal anomalies (AR ) (Congenital)	3
GALE	LoF	Galactose epimerase deficiency (230350) (AR);Thrombocytopenia 13, syndromic (620776) (AR)	Severe Paediatric Disorders (AR ) (-); Undiagnosed metabolic disorders (AR ) (Endocrine/Metabolic); Neonatal cholestasis (AR ) (Digestive); Intellectual disability - microarray and sequencing (AR ) (Nervous); Fetal anomalies (AR ) (Congenital)	4
GALK1	LoF	Galactokinase deficiency with cataracts (230200) (AR)	Severe Paediatric Disorders (AR ) (-); Undiagnosed metabolic disorders (AR ) (Endocrine/Metabolic); Neonatal cholestasis (AR ) (Digestive); Fetal anomalies (AR ) (Congenital); Bilateral congenital or childhood onset cataracts (AR ) (Eye)	4
GALM	LoF	Galactosemia IV (618881) (AR)	Likely inborn error of metabolism - targeted testing not possible (AR ) (Endocrine/Metabolic); Neonatal cholestasis (AR ) (Digestive)	2
GALNS	LoF	Mucopolysaccharidosis IVA (253000) (AR)	Skeletal dysplasia (AR ) (Musculoskeletal/Connective); Severe Paediatric Disorders (AR ) (-); Mucopolysaccharideosis, Gaucher, Fabry (AR ) (Endocrine/Metabolic); Fetal hydrops (AR ) (Congenital)	3
GALNT2	LoF	Congenital disorder of glycosylation, type IIt (618885) (AR)	Inherited white matter disorders (AR ) (Nervous); Fetal anomalies (AR ) (Congenital); Congenital disorders of glycosylation (AR ) (Endocrine/Metabolic)	3
GALNT3	LoF	Tumoral calcinosis, hyperphosphatemic, familial, 1 (211900) (AR)	Pigmentary skin disorders (AR ) (Skin); Skeletal dysplasia (AR ) (Musculoskeletal/Connective); Severe Paediatric Disorders (AR ) (-); Familial tumoral calcinosis (AR ) (Neoplasm); Congenital disorders of glycosylation (AR ) (Endocrine/Metabolic)	4
GALT	LoF	Galactosemia (230400) (AR)	Severe Paediatric Disorders (AR ) (-); Undiagnosed metabolic disorders (AR ) (Endocrine/Metabolic); Primary ovarian insufficiency (AR ) (Endocrine/Metabolic); Neonatal cholestasis (AR ) (Digestive); Intellectual disability - microarray and sequencing (AR ) (Nervous); DDG2P (AR ) (Congenital); Bilateral congenital or childhood onset cataracts (AR ) (Eye)	5
GAMT	LoF	Cerebral creatine deficiency syndrome 2 (612736) (AR)	Severe Paediatric Disorders (AR ) (-); Undiagnosed metabolic disorders (AR ) (Endocrine/Metabolic); Early onset or syndromic epilepsy (AR ) (Nervous); DDG2P (AR ) (Congenital)	3
GAN	LoF	Giant axonal neuropathy-1 (256850) (AR)	Severe Paediatric Disorders (AR ) (-); Hereditary neuropathy (AR ) (Nervous); DDG2P (AR ) (Congenital)	2
GANAB	LoF	Polycystic kidney disease 3 (600666) (AD)	Ductal plate malformation (AD ) (Congenital); Severe Paediatric Disorders (AD ) (-); Polycystic liver disease (AD ) (Digestive); Cystic kidney disease (AD ) (Genitourinary)	3
GARS1	GoF	Charcot-Marie-Tooth disease, type 2D (601472) (AD);Neuronopathy, distal hereditary motor, autosomal dominant 5 (600794) (AD);Spinal muscular atrophy, infantile, James type (619042) (AD)	Severe Paediatric Disorders (AD_GOF ) (-); Undiagnosed metabolic disorders (AD_GOF ) (Endocrine/Metabolic); Possible mitochondrial disorder - nuclear genes (AD_GOF ) (Endocrine/Metabolic); Hereditary neuropathy (AD_GOF ) (Nervous)	2
GAS2L2	LoF	?Ciliary dyskinesia, primary, 41 (618449) (AR)	DDG2P (AR ) (Congenital); Primary ciliary disorders (AR ) (Congenital)	1
GAS8	LoF	Ciliary dyskinesia, primary, 33 (616726) (AR)	Severe Paediatric Disorders (AR ) (-); Respiratory ciliopathies including non-CF bronchiectasis (AR ) (Respiratory); Primary ciliary disorders (AR ) (Congenital); DDG2P (AR ) (Congenital)	2
GATA1	LoF	Anemia, X-linked, with/without neutropenia and/or platelet abnormalities (300835) (XLR);Hemolytic anemia due to elevated adenosine deaminase (301083) (XLR);Leukemia, megakaryoblastic, with or without Down syndrome, somatic (159595);Thrombocytopenia with beta-thalassemia, X-linked (314050) (XLR);Thrombocytopenia, X-linked, with or without dyserythropoietic anemia (300367) (XLR);Anemia, X-linked, w…	Cutaneous photosensitivity with a likely genetic cause (XLR ) (Skin); Severe Paediatric Disorders (XLR ) (-); Rare anaemia (XLR ) (Blood/Immune); Primary immunodeficiency or monogenic inflammatory bowel disease (XLR ) (Blood/Immune); Inherited bleeding disorders (XLR ) (Blood/Immune); Haematological malignancies for rare disease (XLR ) (Neoplasm); Haematological malignancies cancer susceptibility…	3
GATA2	LoF	{Leukemia, acute myeloid, susceptibility to} (601626) (AD, SMu);{Myelodysplastic syndrome, susceptibility to} (614286);Emberger syndrome (614038) (AD);Immunodeficiency 21 (614172) (AD);{Leukemia, acute myeloid, susceptibility to} (601626) (AD, SMu);{Myelodysplastic syndrome, susceptibility to} (614286);Emberger syndrome (614038) (AD);Immunodeficiency 21 (614172) (AD);{Leukemia, acute myeloid, sus…	Fetal anomalies (AD ) (Congenital); Severe Paediatric Disorders (AD ) (-); Primary lymphoedema (AD ) (Circulatory); Haematological malignancies for rare disease (AD ) (Neoplasm); Cytopenias and congenital anaemias (AD ) (Blood/Immune); COVID-19 research (AD ) (Blood/Immune)	4
GATA3	LoF	Hypoparathyroidism, sensorineural deafness, and renal dysplasia (146255) (AD)	Severe Paediatric Disorders (AD ) (-); Unexplained kidney failure in young people (AD ) (Genitourinary); Paediatric disorders - additional genes (AD ) (-); Monogenic hearing loss (AD ) (Ear); Fetal anomalies (AD ) (Congenital); Familial hypoparathyroidism (AD ) (Endocrine/Metabolic)	4
GATA4	LoF	?Testicular anomalies with or without congenital heart disease (615542) (AD);Atrial septal defect 2 (607941) (AD);Atrioventricular septal defect 4 (614430) (AD);Tetralogy of Fallot (187500) (AD);Ventricular septal defect 1 (614429) (AD);?Testicular anomalies with or without congenital heart disease (615542) (AD);Atrial septal defect 2 (607941) (AD);Atrioventricular septal defect 4 (614430) (AD);T…	Fetal anomalies (AD ) (Congenital); Severe Paediatric Disorders (AD ) (-); Familial non syndromic congenital heart disease (AD ) (Ear); Diabetes with additional phenotypes suggestive of a monogenic aetiology (AD ) (Endocrine/Metabolic)	3
GATA6	LoF+GoF	Atrial septal defect 9 (614475) (AD);Atrioventricular septal defect 5 (614474) (AD);Pancreatic agenesis and congenital heart defects (600001) (AD);Persistent truncus arteriosus (217095);Tetralogy of Fallot (187500) (AD);Atrial septal defect 9 (614475) (AD);Atrioventricular septal defect 5 (614474) (AD);Pancreatic agenesis and congenital heart defects (600001) (AD);Persistent truncus arteriosus (2…	Fetal anomalies (AD ) (Congenital); Severe Paediatric Disorders (AD ) (-); Familial non syndromic congenital heart disease (AD ) (Ear); Diabetes with additional phenotypes suggestive of a monogenic aetiology (AD ) (Endocrine/Metabolic)	3
GATAD2B	LoF	GAND syndrome (615074) (AD)	DDG2P (AD ) (Congenital); Severe Paediatric Disorders (AD ) (-); Intellectual disability - microarray and sequencing (AD ) (Nervous)	2
GATB	LoF	?Combined oxidative phosphorylation deficiency 41 (618838) (AR)	Fetal anomalies (AR ) (Congenital)	1
GATM	LoF	Cerebral creatine deficiency syndrome 3 (612718) (AR);Fanconi renotubular syndrome 1 (134600) (AD)	Tubulointerstitial kidney disease (AD ) (Genitourinary); Undiagnosed metabolic disorders (AR ) (Endocrine/Metabolic); Severe Paediatric Disorders (AR ) (-); Intellectual disability - microarray and sequencing (AR ) (Nervous); DDG2P (AR ) (Congenital)	4
GBA1	LoF+GoF	{Lewy body dementia, susceptibility to} (127750) (AD);{Parkinson disease, late-onset, susceptibility to} (168600) (AD, Mu);Gaucher disease, perinatal lethal (608013) (AR);Gaucher disease, type I (230800) (AR);Gaucher disease, type II (230900) (AR);Gaucher disease, type III (231000) (AR);Gaucher disease, type IIIC (231005) (AR);{Lewy body dementia, susceptibility to} (127750) (AD);{Parkinson disea…	Parkinson Disease and Complex Parkinsonism (AD_GOF ) (Nervous); Severe Paediatric Disorders (AR ) (-); Neonatal cholestasis (AR ) (Digestive); Mucopolysaccharideosis, Gaucher, Fabry (AR ) (Endocrine/Metabolic); Inherited bleeding disorders (AR ) (Blood/Immune); Haematological malignancies for rare disease (AR ) (Neoplasm); Fetal hydrops (AR ) (Congenital); Familial pulmonary fibrosis (AR ) (Respi…	8
GBA2	LoF	Spastic paraplegia 46, autosomal recessive (614409) (AR)	Severe Paediatric Disorders (AR ) (-); Fetal anomalies (AR ) (Congenital); Ataxia and cerebellar anomalies - narrow panel (AR ) (Nervous)	2
GBE1	LoF	Glycogen storage disease IV (232500) (AR);Polyglucosan body disease, adult form (263570) (AR)	Severe Paediatric Disorders (AR ) (-); White matter disorders and cerebral calcification - narrow panel (AR ) (Nervous); Rhabdomyolysis and metabolic muscle disorders (AR ) (Musculoskeletal/Connective); Neonatal cholestasis (AR ) (Digestive); Ketotic hypoglycaemia (AR ) (Endocrine/Metabolic); Glycogen storage disease (AR ) (Endocrine/Metabolic); Fetal hydrops (AR ) (Congenital)	5
GBF1	LoF	Charcot-Marie-Tooth disease, axonal, type 2GG (606483) (AD)	Hereditary neuropathy or pain disorder (AD ) (Nervous)	1
GCDH	LoF	Glutaricaciduria, type I (231670) (AR)	Severe Paediatric Disorders (AR ) (-); Undiagnosed metabolic disorders (AR ) (Endocrine/Metabolic); Structural basal ganglia disorders (AR ) (Nervous); Fetal anomalies (AR ) (Congenital)	3
GCH1	LoF	Dystonia, DOPA-responsive (128230) (AD, AR);Hyperphenylalaninemia, BH4-deficient, B (233910) (AR)	DDG2P (AD ) (Congenital); Undiagnosed metabolic disorders (AD ) (Endocrine/Metabolic); Severe Paediatric Disorders (AD ) (-); Neurotransmitter disorders (AD ) (Nervous)	3
GCK	LoF	Diabetes mellitus, noninsulin-dependent, late onset (125853) (AD);Diabetes mellitus, permanent neonatal 1 (606176) (AR);Hyperinsulinemic hypoglycemia, familial, 3 (602485) (AD);MODY, type II (125851) (AD);Diabetes mellitus, noninsulin-dependent, late onset (125853) (AD);Diabetes mellitus, permanent neonatal 1 (606176) (AR);Hyperinsulinemic hypoglycemia, familial, 3 (602485) (AD);MODY, type II (12…	Severe Paediatric Disorders (AD ) (-); Glucokinase-related fasting hyperglycaemia (AD ) (Endocrine/Metabolic); Congenital hyperinsulinism (AD ) (Endocrine/Metabolic)	1
GCLC	LoF	{Myocardial infarction, susceptibility to} (608446);Hemolytic anemia due to gamma-glutamylcysteine synthetase deficiency (230450) (AR);{Myocardial infarction, susceptibility to} (608446);Hemolytic anemia due to gamma-glutamylcysteine synthetase deficiency (230450) (AR);{Myocardial infarction, susceptibility to} (608446);Hemolytic anemia due to gamma-glutamylcysteine synthetase deficiency (230450)…	Severe Paediatric Disorders (AR ) (-); Undiagnosed metabolic disorders (AR ) (Endocrine/Metabolic); Cytopenias and congenital anaemias (AR ) (Blood/Immune)	2
GCM2	LoF	Hyperparathyroidism 4 (617343) (AD);Hypoparathyroidism, familial isolated 2 (618883) (AD, AR)	Familial hyperparathyroidism or hypocalciuric hypercalcaemia (AD ) (Endocrine/Metabolic)	1
GCNT2	LoF	[Blood group, Ii] (110800) (AD);Adult i phenotype without cataract (110800) (AD);Cataract 13 with adult i phenotype (116700) (AR)	Bilateral congenital or childhood onset cataracts (AR ) (Eye)	1
GCSH	LoF	Multiple mitochondrial dysfunctions syndrome 7 (620423) (AR)	Early onset or syndromic epilepsy (AR ) (Nervous); Likely inborn error of metabolism - targeted testing not possible (AR ) (Endocrine/Metabolic); DDG2P (AR ) (Congenital)	3
GDAP1	LoF	Charcot-Marie-Tooth disease, axonal, type 2K (607831) (AD, AR);Charcot-Marie-Tooth disease, axonal, with vocal cord paresis (607706) (AR);Charcot-Marie-Tooth disease, recessive intermediate, A (608340) (AR);Charcot-Marie-Tooth disease, type 4A (214400) (AR)	Severe Paediatric Disorders (AD ) (-); Undiagnosed metabolic disorders (AD ) (Endocrine/Metabolic); Possible mitochondrial disorder - nuclear genes (AD ) (Endocrine/Metabolic); Hereditary neuropathy (AD ) (Nervous)	2
GDF1	LoF	Congenital heart defects, multiple types, 6 (613854) (AD);Right atrial isomerism (Ivemark) (208530) (AR)	Laterality disorders and isomerism (AD ) (Congenital); Paediatric disorders - additional genes (AD ) (-); Familial non syndromic congenital heart disease (AD ) (Ear)	2
GDF11	LoF	?Vertebral hypersegmentation and orofacial anomalies (619122) (AD)	DDG2P (AD ) (Congenital); Clefting (AD ) (Musculoskeletal/Connective)	2
GDF2	LoF	Telangiectasia, hereditary hemorrhagic, type 5 (615506) (AD)	Hereditary haemorrhagic telangiectasia (AD ) (Circulatory)	1
GDF5	LoF+GoF	?Acromesomelic dysplasia 2C, Hunter-Thompson type (201250) (AR);{Osteoarthritis-5} (612400);Acromesomelic dysplasia 2A (200700) (AR);Acromesomelic dysplasia 2B (228900) (AR);Brachydactyly, type A1, C (615072) (AD, AR);Brachydactyly, type A2 (112600) (AD);Brachydactyly, type C (113100) (AD);Multiple synostoses syndrome 2 (610017) (AD);Symphalangism, proximal, 1B (615298) (AD);?Acromesomelic dyspla…	Limb disorders (AD ) (Musculoskeletal/Connective); Severe Paediatric Disorders (AD ) (-); Fetal anomalies (AD ) (Congenital)	2
GDF6	LoF+GoF	Klippel-Feil syndrome 1, autosomal dominant (118100) (AD);Leber congenital amaurosis 17 (615360) (AR);Microphthalmia with coloboma 6, digenic (613703) (AD);Microphthalmia, isolated 4 (613094);Multiple synostoses syndrome 4 (617898) (AD);Klippel-Feil syndrome 1, autosomal dominant (118100) (AD);Leber congenital amaurosis 17 (615360) (AR);Microphthalmia with coloboma 6, digenic (613703) (AD);Microp…	Skeletal dysplasia (AD ) (Musculoskeletal/Connective); Structural eye disease (AD ) (Eye); Severe Paediatric Disorders (AD ) (-); Fetal anomalies (AD ) (Congenital)	3
GDI1	LoF	Intellectual developmental disorder, X-linked 41 (300849) (XLD)	Severe Paediatric Disorders (XLD ) (-); Intellectual disability - microarray and sequencing (XLD ) (Nervous)	1
GEMIN4	LoF	Neurodevelopmental disorder with microcephaly, cataracts, and renal abnormalities (617913) (AR)	DDG2P (AR ) (Congenital)	1
GEMIN5	LoF	Neurodevelopmental disorder with cerebellar atrophy and motor dysfunction (619333) (AR)	Ataxia and cerebellar anomalies - narrow panel (AR ) (Nervous); DDG2P (AR ) (Congenital)	2
GFAP	GoF	Alexander disease (203450) (AD)	Fetal anomalies (AD_GOF ) (Congenital); Severe Paediatric Disorders (AD_GOF ) (-); Hydrocephalus (AD_GOF ) (Nervous)	2
GFER	LoF	Myopathy, mitochondrial progressive, with congenital cataract and developmental delay (613076) (AR)	Severe Paediatric Disorders (AR ) (-); Undiagnosed metabolic disorders (AR ) (Endocrine/Metabolic); Possible mitochondrial disorder - nuclear genes (AR ) (Endocrine/Metabolic); Intellectual disability - microarray and sequencing (AR ) (Nervous); Bilateral congenital or childhood onset cataracts (AR ) (Eye)	3
GFI1	LoF	?Neutropenia, nonimmune chronic idiopathic, of adults (607847) (AD);Neutropenia, severe congenital 2, autosomal dominant (613107) (AD)	COVID-19 research (AD ) (Blood/Immune); Cytopenias and congenital anaemias (AD ) (Blood/Immune)	1
GFI1B	LoF	Bleeding disorder, platelet-type, 17 (187900) (AD, AR)	Severe Paediatric Disorders (AD ) (-); Inherited bleeding disorders (AD ) (Blood/Immune)	1
GFM1	LoF	Combined oxidative phosphorylation deficiency 1 (609060) (AR)	Severe Paediatric Disorders (AR ) (-); White matter disorders and cerebral calcification - narrow panel (AR ) (Nervous); Undiagnosed metabolic disorders (AR ) (Endocrine/Metabolic); Possible mitochondrial disorder - nuclear genes (AR ) (Endocrine/Metabolic); Fetal anomalies (AR ) (Congenital)	3
GFM2	LoF	Combined oxidative phosphorylation deficiency 39 (618397) (AR)	Severe Paediatric Disorders (AR ) (-); Possible mitochondrial disorder - nuclear genes (AR ) (Endocrine/Metabolic); Likely inborn error of metabolism - targeted testing not possible (AR ) (Endocrine/Metabolic)	1
GFPT1	LoF	Myasthenia, congenital, 12, with tubular aggregates (610542) (AR)	Severe Paediatric Disorders (AR ) (-); Other rare neuromuscular disorders (AR ) (Musculoskeletal/Connective); Fetal anomalies (AR ) (Congenital); Congenital disorders of glycosylation (AR ) (Endocrine/Metabolic)	3
GGCX	LoF	Pseudoxanthoma elasticum-like disorder with multiple coagulation factor deficiency (610842);Vitamin K-dependent clotting factors, combined deficiency of, 1 (277450) (AR)	Severe Paediatric Disorders (AD ) (-); Inherited bleeding disorders (AR ) (Blood/Immune); Combined vitamin K-dependent clotting factor deficiency (AR ) (Endocrine/Metabolic)	2
GGPS1	LoF	Muscular dystrophy, congenital hearing loss, and ovarian insufficiency syndrome (619518) (AR)	Congenital muscular dystrophy (AR ) (Musculoskeletal/Connective); Primary ovarian insufficiency (AR ) (Endocrine/Metabolic); Monogenic hearing loss (AR ) (Ear)	3
GH1	LoF	Growth hormone deficiency, isolated, type IA (262400) (AR);Growth hormone deficiency, isolated, type IB (612781);Growth hormone deficiency, isolated, type II (173100) (AD);Kowarski syndrome (262650) (AR)	IUGR and IGF abnormalities (AD ) (Congenital); Severe Paediatric Disorders (AD ) (-); Pituitary hormone deficiency (AD ) (Endocrine/Metabolic)	2
GHR	LoF	{Hypercholesterolemia, familial, modifier of} (143890) (AD, AR);Growth hormone insensitivity, partial (604271) (AD);Increased responsiveness to growth hormone (604271) (AD);Laron dwarfism (262500) (AR);{Hypercholesterolemia, familial, modifier of} (143890) (AD, AR);Growth hormone insensitivity, partial (604271) (AD);Increased responsiveness to growth hormone (604271) (AD);Laron dwarfism (262500) …	Skeletal dysplasia (AD ) (Musculoskeletal/Connective); Severe Paediatric Disorders (AD ) (-); Pituitary hormone deficiency (AR ) (Endocrine/Metabolic); IUGR and IGF abnormalities (AR ) (Congenital)	3
GHRHR	LoF	Growth hormone deficiency, isolated, type IV (618157) (AR)	Severe Paediatric Disorders (AR ) (-); Pituitary hormone deficiency (AR ) (Endocrine/Metabolic); IUGR and IGF abnormalities (AR ) (Congenital)	2
GHSR	LoF	Growth hormone deficiency, isolated partial (615925) (AD, AR)	Pituitary hormone deficiency (AD ) (Endocrine/Metabolic)	1
GIGYF1	LoF	-	DDG2P (AD ) (Congenital)	1
GINS1	LoF	Immunodeficiency 55 (617827) (AR);Immunodeficiency 55 (617827) (AR)	Severe Paediatric Disorders (AR ) (-); COVID-19 research (AR ) (Blood/Immune)	1
GINS3	LoF	-	Severe microcephaly (AR ) (Nervous)	1
GIPC3	LoF	Deafness, autosomal recessive 15 (601869) (AR)	Severe Paediatric Disorders (AR ) (-); Monogenic hearing loss (AR ) (Ear)	1
GJA1	GoF	Craniometaphyseal dysplasia, autosomal recessive (218400) (AR);Erythrokeratodermia variabilis et progressiva 3 (617525) (AD);Oculodentodigital dysplasia (164200) (AD);Oculodentodigital dysplasia, autosomal recessive (257850) (AR);Palmoplantar keratoderma with congenital alopecia (104100) (AD);Syndactyly, type III (186100) (AD)	Fetal anomalies (AD_GOF ) (Congenital); Severe Paediatric Disorders (AD_GOF ) (-); Primary lymphoedema (AD_GOF ) (Circulatory); Palmoplantar keratoderma and erythrokeratodermas (AD_GOF ) (Skin); Glaucoma developmental (AD_GOF ) (Eye); Clefting (AD_GOF ) (Musculoskeletal/Connective); Childhood onset hereditary spastic paraplegia (AD_GOF ) (Nervous)	6
GJA3	LoF	Cataract 14, multiple types (601885) (AD)	Fetal anomalies (AD ) (Congenital); Severe Paediatric Disorders (AD ) (-); Bilateral congenital or childhood onset cataracts (AD ) (Eye)	2
GJA8	LoF	Cataract 1, multiple types (116200) (AD)	Fetal anomalies (AD ) (Congenital); Severe Paediatric Disorders (AD ) (-); Bilateral congenital or childhood onset cataracts (AD ) (Eye)	2
GJB1	LoF	Charcot-Marie-Tooth neuropathy, X-linked dominant, 1 (302800) (XLD)	Severe Paediatric Disorders (XLD ) (-); White matter disorders and cerebral calcification - narrow panel (XLD ) (Nervous); Hereditary neuropathy or pain disorder (XLD ) (Nervous); Hereditary neuropathy (XLD ) (Nervous); Adult onset leukodystrophy (XLD ) (Nervous)	1
GJB2	LoF	Bart-Pumphrey syndrome (149200) (AD);Deafness, autosomal dominant 3A (601544) (AD);Deafness, autosomal recessive 1A (220290) (AR, DD);Hystrix-like ichthyosis with deafness (602540) (AD);Keratitis-ichthyosis-deafness syndrome (148210) (AD);Keratoderma, palmoplantar, with deafness (148350) (AD);Vohwinkel syndrome (124500) (AD);Bart-Pumphrey syndrome (149200) (AD);Deafness, autosomal dominant 3A (60…	Palmoplantar keratoderma and erythrokeratodermas (AD ) (Skin); Severe Paediatric Disorders (AD ) (-); Monogenic hearing loss (AD ) (Ear)	2
GJB3	LoF	Deafness, autosomal dominant 2B, with or without peripheral neuropathy (612644) (AD);Deafness, digenic, GJB2/GJB3 (220290) (AR, DD);Erythrokeratodermia variabilis et progressiva 1 (133200) (AD, AR);Deafness, autosomal dominant 2B, with or without peripheral neuropathy (612644) (AD);Deafness, digenic, GJB2/GJB3 (220290) (AR, DD);Erythrokeratodermia variabilis et progressiva 1 (133200) (AD, AR)	DDG2P (AD ) (Congenital); Severe Paediatric Disorders (AD ) (-); Palmoplantar keratoderma and erythrokeratodermas (AD ) (Skin); Monogenic hearing loss (AD ) (Ear)	3
GJB4	LoF	Erythrokeratodermia variabilis et progressiva 2 (617524) (AD)	Palmoplantar keratoderma and erythrokeratodermas (AD ) (Skin)	1
GJB6	LoF	Deafness, autosomal dominant 3B (612643) (AD);Deafness, autosomal recessive 1B (612645) (AR);Deafness, digenic GJB2/GJB6 (220290) (AR, DD);Ectodermal dysplasia 2, Clouston type (129500) (AD);Deafness, autosomal dominant 3B (612643) (AD);Deafness, autosomal recessive 1B (612645) (AR);Deafness, digenic GJB2/GJB6 (220290) (AR, DD);Ectodermal dysplasia 2, Clouston type (129500) (AD)	Palmoplantar keratoderma and erythrokeratodermas (AD ) (Skin)	1
GJC2	LoF+GoF	?Spastic paraplegia 44, autosomal recessive (613206) (AR);Leukodystrophy, hypomyelinating, 2 (608804) (AR);Lymphatic malformation 3 (613480) (AD)	Fetal anomalies (AD ) (Congenital); White matter disorders and cerebral calcification - narrow panel (AR ) (Nervous); Severe Paediatric Disorders (AD ) (-); Primary lymphoedema (AD ) (Circulatory)	3
GK	LoF	Glycerol kinase deficiency (307030) (XLR)	DDG2P (XLR ) (Congenital); Undiagnosed metabolic disorders (XLR ) (Endocrine/Metabolic); Severe Paediatric Disorders (XLR ) (-); Likely inborn error of metabolism - targeted testing not possible (XLR ) (Endocrine/Metabolic); Intellectual disability - microarray and sequencing (XLR ) (Nervous)	3
GLA	LoF	Fabry disease (301500) (XL);Fabry disease, cardiac variant (301500) (XL)	Fetal anomalies (XLD ) (Congenital); Unexplained young onset end-stage renal disease (XLD ) (Genitourinary); Unexplained kidney failure in young people (XLD ) (Genitourinary); Undiagnosed metabolic disorders (XLD ) (Endocrine/Metabolic); Severe Paediatric Disorders (XLD ) (-); Proteinuric renal disease (XLD ) (Genitourinary); Progressive cardiac conduction disease (XLD ) (Circulatory); Pain syndr…	5
GLB1	LoF	GM1-gangliosidosis, type I (230500) (AR);GM1-gangliosidosis, type II (230600) (AR);GM1-gangliosidosis, type III (230650) (AR);Mucopolysaccharidosis type IVB (Morquio) (253010) (AR)	Skeletal dysplasia (AR ) (Musculoskeletal/Connective); White matter disorders and cerebral calcification - narrow panel (AR ) (Nervous); Severe Paediatric Disorders (AR ) (-); Mucopolysaccharideosis, Gaucher, Fabry (AR ) (Endocrine/Metabolic); Fetal hydrops (AR ) (Congenital)	4
GLDC	LoF	Glycine encephalopathy1 (605899) (AR)	Severe Paediatric Disorders (AR ) (-); Undiagnosed metabolic disorders (AR ) (Endocrine/Metabolic); Fetal anomalies (AR ) (Congenital); Early onset or syndromic epilepsy (AR ) (Nervous)	3
GLDN	LoF	Lethal congenital contracture syndrome 11 (617194) (AR)	Severe Paediatric Disorders (AR ) (-); Fetal anomalies (AR ) (Congenital); Arthrogryposis (AR ) (Musculoskeletal/Connective)	2
GLE1	LoF	Congenital arthrogryposis with anterior horn cell disease (611890) (AR);Lethal congenital contracture syndrome 1 (253310) (AR)	Severe Paediatric Disorders (AR ) (-); Fetal anomalies (AR ) (Congenital); Arthrogryposis (AR ) (Musculoskeletal/Connective)	2
GLI1	LoF	Polydactyly, postaxial, type A8 (618123) (AR);Polydactyly, preaxial I (174400) (AR)	Limb disorders (AR ) (Musculoskeletal/Connective); Severe Paediatric Disorders (AR ) (-); Fetal anomalies (AR ) (Congenital)	2
GLI2	LoF	Culler-Jones syndrome (615849) (AD);Holoprosencephaly 9 (610829) (AD)	IUGR and IGF abnormalities (AD ) (Congenital); Severe Paediatric Disorders (AD ) (-); Pituitary hormone deficiency (AD ) (Endocrine/Metabolic); Limb disorders (AD ) (Musculoskeletal/Connective); Holoprosencephaly - NOT chromosomal (AD ) (Nervous)	4
GLI3	LoF	Greig cephalopolysyndactyly syndrome (175700) (AD);Pallister-Hall syndrome (146510) (AD);Polydactyly, postaxial, types A1 and B (174200) (AD);Polydactyly, preaxial, type IV (174700) (AD)	IUGR and IGF abnormalities (AD ) (Congenital); Unexplained kidney failure in young people (AD ) (Genitourinary); Severe Paediatric Disorders (AD ) (-); Rare multisystem ciliopathy disorders (AD ) (Congenital); Pituitary hormone deficiency (AD ) (Endocrine/Metabolic); Ophthalmological ciliopathies (AD ) (Eye); Non-syndromic familial congenital anorectal malformations (AD ) (Digestive); Limb disord…	7
GLIS2	LoF	Nephronophthisis 7 (611498) (AR)	DDG2P (AR ) (Congenital)	1
GLIS3	LoF	Diabetes mellitus, neonatal, with congenital hypothyroidism (610199) (AR)	Severe Paediatric Disorders (AR ) (-); Intellectual disability - microarray and sequencing (AR ) (Nervous); Fetal anomalies (AR ) (Congenital); Diabetes with additional phenotypes suggestive of a monogenic aetiology (AR ) (Endocrine/Metabolic)	3
GLMN	LoF	Glomuvenous malformations (138000) (AD)	DDG2P (AD ) (Congenital); Vascular skin disorders (AD ) (Skin); Severe Paediatric Disorders (AD ) (-)	2
GLRA1	LoF	Hyperekplexia 1 (149400) (AD, AR)	DDG2P (AD ) (Congenital); Undiagnosed metabolic disorders (AD ) (Endocrine/Metabolic); Severe Paediatric Disorders (AD ) (-); Brain channelopathy (AD ) (Nervous)	3
GLRA2	LoF+GoF	Intellectual developmental disorder, X-linked syndromic, Pilorge type (301076) (XL)	Early onset or syndromic epilepsy (XLD ) (Nervous); Intellectual disability - microarray and sequencing (XLD ) (Nervous)	1
GLRB	LoF	Hyperekplexia 2 (614619) (AR)	Severe Paediatric Disorders (AR ) (-); DDG2P (AR ) (Congenital); Brain channelopathy (AR ) (Nervous)	2
GLRX5	LoF	Anemia, sideroblastic, 3, pyridoxine-refractory (616860) (AR);Spasticity, childhood-onset, with hyperglycinemia (616859) (AR)	Severe Paediatric Disorders (AR ) (-); White matter disorders and cerebral calcification - narrow panel (AR ) (Nervous); Pyruvate dehydrogenase PDH deficiency (AR ) (Endocrine/Metabolic); Possible mitochondrial disorder - nuclear genes (AR ) (Endocrine/Metabolic); Cytopenias and congenital anaemias (AR ) (Blood/Immune)	3
GLS	LoF+GoF	?Infantile cataract, skin abnormalities, glutamate excess, and impaired intellectual development (618339) (AD);Developmental and epileptic encephalopathy 71 (618328) (AR);Global developmental delay, progressive ataxia, and elevated glutamine (618412) (AR)	Likely inborn error of metabolism - targeted testing not possible (AR ) (Endocrine/Metabolic)	1
GLUD1	GoF	Hyperinsulinism-hyperammonemia syndrome (606762) (AD)	Severe Paediatric Disorders (AD_GOF ) (-); Hyperammonaemia (AD_GOF ) (Endocrine/Metabolic); Early onset or syndromic epilepsy (AD_GOF ) (Nervous); DDG2P (AD_GOF ) (Congenital); Congenital hyperinsulinism (AD_GOF ) (Endocrine/Metabolic)	3
GLUL	LoF	Developmental and epileptic encephalopathy 116 (620806) (AD);Glutamine deficiency, congenital (610015) (AR)	Severe Paediatric Disorders (AR ) (-); Undiagnosed metabolic disorders (AR ) (Endocrine/Metabolic); Fetal anomalies (AR ) (Congenital); Early onset or syndromic epilepsy (AR ) (Nervous)	3
GLYCTK	LoF	D-glyceric aciduria (220120) (AR)	Severe Paediatric Disorders (AR ) (-); Undiagnosed metabolic disorders (AR ) (Endocrine/Metabolic); Intellectual disability - microarray and sequencing (AR ) (Nervous)	2
GM2A	LoF	GM2-gangliosidosis, AB variant (272750) (AR)	Severe Paediatric Disorders (AR ) (-); Lysosomal storage disorder (AR ) (Endocrine/Metabolic); Early onset or syndromic epilepsy (AR ) (Nervous); DDG2P (AR ) (Congenital)	3
GMNN	GoF	Meier-Gorlin syndrome 6 (616835) (AD)	Severe Paediatric Disorders (AD_GOF ) (-); Severe microcephaly (AD_GOF ) (Nervous); Fetal anomalies (AD_GOF ) (Congenital)	2
GMPPA	LoF	Alacrima, achalasia, and impaired intellectual development syndrome (615510) (AR)	Severe Paediatric Disorders (AR ) (-); Familial dysautonomia (AR ) (Nervous); DDG2P (AR ) (Congenital); Congenital disorders of glycosylation (AR ) (Endocrine/Metabolic)	3
GMPPB	LoF	Muscular dystrophy-dystroglycanopathy (congenital with brain and eye anomalies), type A, 14 (615350) (AR);Muscular dystrophy-dystroglycanopathy (congenital with impaired intellectual development), type B, 14 (615351) (AR);Muscular dystrophy-dystroglycanopathy (limb-girdle), type C, 14 (615352) (AR)	Severe Paediatric Disorders (AR ) (-); Rhabdomyolysis and metabolic muscle disorders (AR ) (Musculoskeletal/Connective); Fetal anomalies (AR ) (Congenital); Congenital disorders of glycosylation (AR ) (Endocrine/Metabolic); Ataxia and cerebellar anomalies - narrow panel (AR ) (Nervous)	4
GNA11	GoF	Hypocalcemia, autosomal dominant 2 (615361) (AD);Hypocalciuric hypercalcemia, type II (145981) (AD)	DDG2P (AD_GOF ) (Congenital); Renal tubulopathies (AD_GOF ) (Genitourinary); Mosaic skin disorders - deep sequencing (AD_GOF ) (Skin); Familial hypoparathyroidism (AD_GOF ) (Endocrine/Metabolic)	4
GNA14	LoF	-	DDG2P (AD ) (Congenital); Mosaic skin disorders - deep sequencing (AD ) (Skin)	2
GNAI1	LoF	Neurodevelopmental disorder with hypotonia, impaired speech, and behavioral abnormalities (619854) (AD)	DDG2P (AD ) (Congenital); Severe Paediatric Disorders (AD ) (-); Intellectual disability - microarray and sequencing (AD ) (Nervous)	2
GNAI3	LoF	Auriculocondylar syndrome 1 (602483) (AD)	Fetal anomalies (AD ) (Congenital); Severe Paediatric Disorders (AD ) (-); Deafness and congenital structural abnormalities (AD ) (Ear)	2
GNAL	LoF	Dystonia 25 (615073) (AD)	Severe Paediatric Disorders (AD ) (-); Adult onset dystonia, chorea or related movement disorder (AD ) (Nervous)	1
GNAO1	GoF	Developmental and epileptic encephalopathy 17 (615473) (AD);Neurodevelopmental disorder with involuntary movements (617493) (AD)	Fetal anomalies (AD_GOF ) (Congenital); Severe Paediatric Disorders (AD_GOF ) (-); Early onset dystonia (AD_GOF ) (Nervous)	2
GNAQ	GoF	Capillary malformations, congenital, 1, somatic, mosaic (163000);Sturge-Weber syndrome, somatic, mosaic (185300)	Mosaic skin disorders - deep sequencing (AD_GOF ) (Skin); Early onset or syndromic epilepsy (AD_GOF ) (Nervous); DDG2P (AD_GOF ) (Congenital)	3
GNAS	GoF	ACTH-independent macronodular adrenal hyperplasia (219080) (SMu);McCune-Albright syndrome, somatic, mosaic (174800);Osseous heteroplasia, progressive (166350) (AD);Pituitary adenoma 3, multiple types, somatic (617686);Pseudohypoparathyroidism Ia (103580) (AD);Pseudohypoparathyroidism Ib (603233) (AD);Pseudohypoparathyroidism Ic (612462) (AD);Pseudopseudohypoparathyroidism (612463) (AD);ACTH-indep…	Fetal anomalies (AD_GOF ) (Congenital); Severe Paediatric Disorders (AD_GOF ) (-); Severe early-onset obesity (AD_GOF ) (Endocrine/Metabolic); Neurofibromatosis Type 1 (AD_GOF ) (Neoplasm); Mosaic skin disorders - deep sequencing (AD_GOF ) (Skin); Limb disorders (AD_GOF ) (Musculoskeletal/Connective); Intellectual disability - microarray and sequencing (AD_GOF ) (Nervous); Congenital hypothyroidi…	6
GNAT1	LoF	Night blindness, congenital stationary, autosomal dominant 3 (610444) (AD);Night blindness, congenital stationary, type 1G (616389) (AR)	Retinal disorders (AD ) (Eye)	1
GNAT2	LoF	Achromatopsia 4 (613856)	Retinal disorders (AR ) (Eye)	1
GNB1	LoF+GoF	Intellectual developmental disorder, autosomal dominant 42 (616973) (AD);Leukemia, acute lymphoblastic, somatic (613065);Myelodysplastic syndrome, somatic (614286);Intellectual developmental disorder, autosomal dominant 42 (616973) (AD);Leukemia, acute lymphoblastic, somatic (613065);Myelodysplastic syndrome, somatic (614286);Intellectual developmental disorder, autosomal dominant 42 (616973) (AD…	Fetal anomalies (AD ) (Congenital); Severe Paediatric Disorders (AD ) (-); Early onset or syndromic epilepsy (AD ) (Nervous)	2
GNB2	LoF	?Sick sinus syndrome 4 (619464) (AD);Neurodevelopmental disorder with hypotonia and dysmorphic facies (619503) (AD)	DDG2P (AD ) (Congenital); Intellectual disability - microarray and sequencing (AD ) (Nervous)	2
GNB3	LoF	{Hypertension, essential, susceptibility to} (145500) (Mu);Night blindness, congenital stationary, type 1H (617024) (AR);{Hypertension, essential, susceptibility to} (145500) (Mu);Night blindness, congenital stationary, type 1H (617024) (AR);{Hypertension, essential, susceptibility to} (145500) (Mu);Night blindness, congenital stationary, type 1H (617024) (AR);{Hypertension, essential, susceptibi…	Retinal disorders (AR ) (Eye)	1
GNB4	LoF	Charcot-Marie-Tooth disease, dominant intermediate F (615185) (AD)	Hereditary neuropathy (AD ) (Nervous)	1
GNB5	LoF	Lodder-Merla syndrome, type 1, with impaired intellectual development and cardiac arrhythmia (617173) (AR);Lodder-Merla syndrome, type 2, with developmental delay and with or without cardiac arrhythmia (617182) (AR)	Severe Paediatric Disorders (AR ) (-); Early onset or syndromic epilepsy (AR ) (Nervous); DDG2P (AR ) (Congenital); Cardiac arrhythmias - additional genes (AR ) (Circulatory)	3
GNE	LoF	Nonaka myopathy (605820) (AR);Sialuria (269921) (AD);Thrombocytopenia 12 with or without myopathy (620757) (AR)	Severe Paediatric Disorders (AD ) (-); Lysosomal storage disorder (AD ) (Endocrine/Metabolic); Inherited bleeding disorders (AR ) (Blood/Immune); Distal myopathies (AR ) (Musculoskeletal/Connective)	3
GNMT	LoF	Glycine N-methyltransferase deficiency (606664) (AR)	Severe Paediatric Disorders (AR ) (-); Undiagnosed metabolic disorders (AR ) (Endocrine/Metabolic)	1
GNPAT	LoF	Rhizomelic chondrodysplasia punctata, type 2 (222765) (AR)	Chondrodysplasia punctata (AR ) (Musculoskeletal/Connective); Severe Paediatric Disorders (AR ) (-); Peroxisomal disorders (AR ) (Endocrine/Metabolic); Intellectual disability - microarray and sequencing (AR ) (Nervous); Fetal anomalies (AR ) (Congenital); Bilateral congenital or childhood onset cataracts (AR ) (Eye)	5
GNPTAB	LoF	Mucolipidosis II alpha/beta (252500) (AR);Mucolipidosis III alpha/beta (252600) (AR)	Skeletal dysplasia (AR ) (Musculoskeletal/Connective); Severe Paediatric Disorders (AR ) (-); Mucopolysaccharideosis, Gaucher, Fabry (AR ) (Endocrine/Metabolic); Intellectual disability - microarray and sequencing (AR ) (Nervous); Fetal hydrops (AR ) (Congenital)	4
GNPTG	LoF	Mucolipidosis III gamma (252605) (AR)	Skeletal dysplasia (AR ) (Musculoskeletal/Connective); Severe Paediatric Disorders (AR ) (-); Retinal disorders (AR ) (Eye); Mucopolysaccharideosis, Gaucher, Fabry (AR ) (Endocrine/Metabolic); Intellectual disability - microarray and sequencing (AR ) (Nervous); Fetal anomalies (AR ) (Congenital)	5
GNRH1	LoF	?Hypogonadotropic hypogonadism 12 with or without anosmia (614841) (AR)	Hypogonadotropic hypogonadism (AR ) (Endocrine/Metabolic)	1
GNRHR	LoF	Hypogonadotropic hypogonadism 7 without anosmia (146110) (AR)	Pituitary hormone deficiency (AR ) (Endocrine/Metabolic)	1
GNS	LoF	Mucopolysaccharidosis type IIID (252940) (AR)	Skeletal dysplasia (AR ) (Musculoskeletal/Connective); Severe Paediatric Disorders (AR ) (-); Mucopolysaccharideosis, Gaucher, Fabry (AR ) (Endocrine/Metabolic); Intellectual disability - microarray and sequencing (AR ) (Nervous); Fetal anomalies (AR ) (Congenital)	4
GOLGA2	LoF	Developmental delay with hypotonia, myopathy, and brain abnormalities (620240) (AR)	DDG2P (AR ) (Congenital)	1
GON7	LoF	Galloway-Mowat syndrome 9 (619603) (AR)	Proteinuric renal disease (AR ) (Genitourinary)	1
GORAB	LoF	Geroderma osteodysplasticum (231070) (AR)	Skeletal dysplasia (AR ) (Musculoskeletal/Connective); Severe Paediatric Disorders (AR ) (-); Fetal anomalies (AR ) (Congenital); Congenital disorders of glycosylation (AR ) (Endocrine/Metabolic)	3
GOSR2	LoF	Epilepsy, progressive myoclonic 6 (614018) (AR);Muscular dystrophy, congenital, with or without seizures (620166) (AR)	Severe Paediatric Disorders (AR ) (-); Ataxia and cerebellar anomalies - narrow panel (AR ) (Nervous)	1
GOT2	LoF	Developmental and epileptic encephalopathy 82 (618721) (AR)	DDG2P (AR ) (Congenital); Early onset or syndromic epilepsy (AR ) (Nervous)	2
GP1BA	LoF	{Nonarteritic anterior ischemic optic neuropathy, susceptibility to} (258660) (AR);Bernard-Soulier syndrome, type A1 (recessive) (231200) (AR);Bernard-Soulier syndrome, type A2 (dominant) (153670) (AD);von Willebrand disease, platelet-type (177820) (AD);{Nonarteritic anterior ischemic optic neuropathy, susceptibility to} (258660) (AR);Bernard-Soulier syndrome, type A1 (recessive) (231200) (AR);Be…	Severe Paediatric Disorders (AD ) (-); Inherited bleeding disorders (AD ) (Blood/Immune)	1
GP1BB	LoF	Bernard-Soulier syndrome, type B (231200) (AR);Giant platelet disorder, isolated (231200) (AR);Bernard-Soulier syndrome, type B (231200) (AR);Giant platelet disorder, isolated (231200) (AR)	Inherited bleeding disorders (AD ) (Blood/Immune); Severe Paediatric Disorders (AR ) (-)	1
GP6	LoF	Bleeding disorder, platelet-type, 11 (614201) (AR)	Severe Paediatric Disorders (AR ) (-); Inherited bleeding disorders (AR ) (Blood/Immune)	1
GP9	LoF	Bernard-Soulier syndrome, type C (231200) (AR);Bernard-Soulier syndrome, type C (231200) (AR)	Severe Paediatric Disorders (AR ) (-); Inherited bleeding disorders (AR ) (Blood/Immune)	1
GPAA1	LoF	Glycosylphosphatidylinositol biosynthesis defect 15 (617810) (AR)	Severe Paediatric Disorders (AR ) (-); DDG2P (AR ) (Congenital); Ataxia and cerebellar anomalies - narrow panel (AR ) (Nervous)	2
GPC3	LoF	Simpson-Golabi-Behmel syndrome, type 1 (312870) (XLR);Wilms tumor, somatic (194070);Simpson-Golabi-Behmel syndrome, type 1 (312870) (XLR);Wilms tumor, somatic (194070);Simpson-Golabi-Behmel syndrome, type 1 (312870) (XLR);Wilms tumor, somatic (194070)	Beckwith-Wiedemann syndrome BWS and other congenital overgrowth disorders (XLR ) (Congenital); Severe Paediatric Disorders (XLR ) (-); Limb disorders (XLR ) (Musculoskeletal/Connective); Intellectual disability - microarray and sequencing (XLR ) (Nervous); Fetal anomalies (XLR ) (Congenital); DDG2P (XLR ) (Congenital); Congenital hyperinsulinism (XLR ) (Endocrine/Metabolic); Clefting (XLR ) (Musc…	6
GPC4	LoF	Keipert syndrome (301026) (XLR)	DDG2P (XLR ) (Congenital); Intellectual disability - microarray and sequencing (XLR ) (Nervous)	2
GPC6	LoF	Omodysplasia 1 (258315) (AR)	Skeletal dysplasia (AR ) (Musculoskeletal/Connective); Severe Paediatric Disorders (AR ) (-); Fetal anomalies (AR ) (Congenital)	2
GPD1	LoF	Hypertriglyceridemia, transient infantile (614480) (AR)	Severe Paediatric Disorders (AR ) (-); Severe hypertriglyceridaemia (AR ) (Endocrine/Metabolic)	1
GPHN	LoF	Molybdenum cofactor deficiency C (615501) (AR)	Early onset or syndromic epilepsy (AD ) (Nervous); Undiagnosed metabolic disorders (AD ) (Endocrine/Metabolic); Severe Paediatric Disorders (AR ) (-)	2
GPI	LoF	Hemolytic anemia, nonspherocytic, due to glucose phosphate isomerase deficiency (613470) (AR)	Severe Paediatric Disorders (AR ) (-); Rare anaemia (AR ) (Blood/Immune); Fetal anomalies (AR ) (Congenital)	2
GPIHBP1	GoF	Hyperlipoproteinemia, type 1D (615947) (AR)	Severe hypertriglyceridaemia (AR_GOF ) (Endocrine/Metabolic)	1
GPNMB	LoF	Amyloidosis, primary localized cutaneous, 3 (617920) (AR)	Pigmentary skin disorders (AR ) (Skin)	1
GPR143	LoF	Nystagmus 6, congenital, X-linked (300814) (XLR);Ocular albinism, type I, Nettleship-Falls type (300500) (XL)	Albinism or congenital nystagmus (XLR ) (Skin); Severe Paediatric Disorders (XLR ) (-); Retinal disorders (XLR ) (Eye); Ocular and oculo-cutaneous albinism (XLR ) (Skin); Infantile nystagmus (XLR ) (Eye)	2
GPR161	LoF	{Medulloblastoma predisposition syndrome} (155255) (AD, AR, SMu);{Medulloblastoma predisposition syndrome} (155255) (AD, AR, SMu);{Medulloblastoma predisposition syndrome} (155255) (AD, AR, SMu);{Medulloblastoma predisposition syndrome} (155255) (AD, AR, SMu)	Childhood solid tumours (AD ) (Neoplasm)	1
GPR179	LoF	Night blindness, congenital stationary (complete), 1E, autosomal recessive (614565) (AR)	Severe Paediatric Disorders (AR ) (-); Retinal disorders (AR ) (Eye)	1
GPR68	LoF	Amelogenesis imperfecta, hypomaturation type, IIA6 (617217) (AR)	Amelogenesis imperfecta (AR ) (Musculoskeletal/Connective)	1
GPSM2	LoF	Chudley-McCullough syndrome (604213) (AR)	Severe Paediatric Disorders (AR ) (-); Monogenic hearing loss (AR ) (Ear); Hydrocephalus (AR ) (Nervous); Fetal anomalies (AR ) (Congenital)	3
GPT2	LoF	Neurodevelopmental disorder with microcephaly and spastic paraplegia (616281) (AR)	Severe Paediatric Disorders (AR ) (-); Severe microcephaly (AR ) (Nervous)	1
GPX4	LoF	Spondylometaphyseal dysplasia, Sedaghatian type (250220) (AR)	Skeletal dysplasia (AR ) (Musculoskeletal/Connective); DDG2P (AR ) (Congenital)	2
GREB1L	LoF	Deafness, autosomal dominant 80 (619274) (AD);Renal hypodysplasia/aplasia 3 (617805) (AD)	Fetal anomalies (AD ) (Congenital); Paediatric disorders - additional genes (AD ) (-); Monogenic hearing loss (AD ) (Ear); CAKUT (AD ) (Genitourinary)	3
GRHL2	LoF	Corneal dystrophy, posterior polymorphous, 4 (618031) (AD);Deafness, autosomal dominant 28 (608641) (AD);Ectodermal dysplasia/short stature syndrome (616029) (AR)	Corneal dystrophy (AD ) (Eye); Monogenic hearing loss (AD ) (Ear); Ectodermal dysplasia (AR ) (Skin); DDG2P (AR ) (Congenital)	4
GRHL3	LoF	van der Woude syndrome 2 (606713) (AD)	Fetal anomalies (AD ) (Congenital); Severe Paediatric Disorders (AD ) (-); Clefting (AD ) (Musculoskeletal/Connective)	2
GRHPR	LoF	Hyperoxaluria, primary, type II (260000) (AR)	Severe Paediatric Disorders (AR ) (-); Undiagnosed metabolic disorders (AR ) (Endocrine/Metabolic); Nephrocalcinosis or nephrolithiasis (AR ) (Genitourinary)	2
GRIA1	LoF+GoF	?Intellectual developmental disorder, autosomal recessive 76 (619931) (AR);Intellectual developmental disorder, autosomal dominant 67 (619927) (AD)	DDG2P (AD ) (Congenital); Intellectual disability - microarray and sequencing (AD ) (Nervous)	2
GRIA2	LoF	Neurodevelopmental disorder with language impairment and behavioral abnormalities (618917) (AD)	DDG2P (AD ) (Congenital); Severe Paediatric Disorders (AD ) (-); Early onset or syndromic epilepsy (AD ) (Nervous)	2
GRIA3	LoF+GoF	Intellectual developmental disorder, X-linked syndromic, Wu type (300699) (XLR)	DDG2P (XLR ) (Congenital); Severe Paediatric Disorders (XLR ) (-); Intellectual disability - microarray and sequencing (XLR ) (Nervous)	2
GRIA4	LoF	Neurodevelopmental disorder with or without seizures and gait abnormalities (617864) (AD)	Severe Paediatric Disorders (AD ) (-); Early onset or syndromic epilepsy (AD ) (Nervous)	1
GRID2	LoF	Spinocerebellar ataxia, autosomal recessive 18 (616204) (AR)	DDG2P (AD ) (Congenital); Severe Paediatric Disorders (AR ) (-); Ataxia and cerebellar anomalies - narrow panel (AR ) (Nervous)	2
GRIK2	LoF+GoF	Intellectual developmental disorder, autosomal recessive 6 (611092) (AR);Neurodevelopmental disorder with impaired language and ataxia and with or without seizures (619580) (AD)	DDG2P (AD_GOF ) (Congenital); Severe Paediatric Disorders (AR ) (-); Early onset or syndromic epilepsy (AD_GOF ) (Nervous)	2
GRIN1	LoF+GoF	Developmental and epileptic encephalopathy 101 (619814) (AR);Neurodevelopmental disorder with or without hyperkinetic movements and seizures, autosomal dominant (614254) (AD);Neurodevelopmental disorder with or without hyperkinetic movements and seizures, autosomal recessive (617820) (AR)	Fetal anomalies (AD ) (Congenital); Severe Paediatric Disorders (AD ) (-); Malformations of cortical development (AD ) (Nervous)	2
GRIN2A	LoF	Epilepsy, focal, with speech disorder and with or without impaired intellectual development (245570) (AD)	DDG2P (AD ) (Congenital); Severe Paediatric Disorders (AD ) (-); Early onset or syndromic epilepsy (AD ) (Nervous)	2
GRIN2B	LoF+GoF	Developmental and epileptic encephalopathy 27 (616139) (AD);Intellectual developmental disorder, autosomal dominant 6, with or without seizures (613970) (AD)	Severe Paediatric Disorders (AD ) (-); Malformations of cortical development (AD ) (Nervous); Fetal anomalies (AD ) (Congenital)	2
GRIN2D	GoF	Developmental and epileptic encephalopathy 46 (617162) (AD)	Severe Paediatric Disorders (AD_GOF ) (-); Early onset or syndromic epilepsy (AD_GOF ) (Nervous); DDG2P (AD_GOF ) (Congenital)	2
GRIP1	LoF	Fraser syndrome 3 (617667) (AR)	Limb disorders (AR ) (Musculoskeletal/Connective); Unexplained kidney failure in young people (AR ) (Genitourinary); Severe Paediatric Disorders (AR ) (-); Fetal anomalies (AR ) (Congenital); Deafness and congenital structural abnormalities (AR ) (Ear); Anophthalmia or microphthalmia (AR ) (Eye)	5
GRK1	LoF	Oguchi disease-2 (613411)	Retinal disorders (AR ) (Eye)	1
GRM1	LoF+GoF	Spinocerebellar ataxia 44 (617691) (AD);Spinocerebellar ataxia, autosomal recessive 13 (614831) (AR)	Severe Paediatric Disorders (AD ) (-); Hereditary ataxia (AD ) (Nervous); DDG2P (AR ) (Congenital)	2
GRM6	LoF	Night blindness, congenital stationary (complete), 1B, autosomal recessive (257270) (AR)	Severe Paediatric Disorders (AR ) (-); Retinal disorders (AR ) (Eye); DDG2P (AR ) (Congenital)	2
GRM7	LoF	Neurodevelopmental disorder with seizures, hypotonia, and brain abnormalities (618922) (AR)	Severe microcephaly (AR ) (Nervous); DDG2P (AR ) (Congenital)	2
GRN	LoF	Aphasia, primary progressive (607485) (AD, AR);Ceroid lipofuscinosis, neuronal, 11 (614706) (AR);Frontotemporal dementia 2 (607485) (AD, AR)	Severe Paediatric Disorders (AD ) (-); Retinal disorders (AR ) (Eye); Parkinson Disease and Complex Parkinsonism (AD ) (Nervous)	2
GRXCR1	LoF	Deafness, autosomal recessive 25 (613285) (AR)	Monogenic hearing loss (AR ) (Ear)	1
GSC	LoF	Short stature, auditory canal atresia, mandibular hypoplasia, skeletal abnormalities (602471) (AR)	Skeletal dysplasia (AR ) (Musculoskeletal/Connective); Severe Paediatric Disorders (AR ) (-); Fetal anomalies (AR ) (Congenital); Deafness and congenital structural abnormalities (AR ) (Ear)	3
GSDME	GoF	Deafness, autosomal dominant 5 (600994) (AD)	Severe Paediatric Disorders (AD_GOF ) (-); Monogenic hearing loss (AD_GOF ) (Ear)	1
GSN	LoF	Amyloidosis, Finnish type (105120) (AD)	Periodic fever syndromes (AD ) (Musculoskeletal/Connective); Corneal abnormalities (AD ) (Eye); Adult onset leukodystrophy (AD ) (Nervous)	3
GSPT2	LoF	-	DDG2P (XLR ) (Congenital)	1
GSR	LoF	Hemolytic anemia due to glutathione reductase deficiency (618660) (AR)	Rare anaemia (AR ) (Blood/Immune)	1
GSS	LoF	Glutathione synthetase deficiency (266130) (AR);Hemolytic anemia due to glutathione synthetase deficiency (231900) (AR);Glutathione synthetase deficiency (266130) (AR);Hemolytic anemia due to glutathione synthetase deficiency (231900) (AR)	Severe Paediatric Disorders (AR ) (-); Undiagnosed metabolic disorders (AR ) (Endocrine/Metabolic); Cytopenias and congenital anaemias (AR ) (Blood/Immune)	2
[truncated: 2,419 more rows]

## Sheet: Table S2
#Table S2. Reported disease frequency, calculated reported carrier frequency, and calculated carrier frequency for recessive diseases in different ancestries.
[truncated: 71 more rows]

[truncated: 10 more sheets: Table S3, Table S4, Table S5, Table S6, Table S7, Table S8, Table S9, Table S10, Table S11, Table S12]
