# Supplementary material for: Inherited burden for disease predisposition in diverse populations
Source: Research Square preprint supplement (doi:10.21203/rs.3.rs-6169692/v1), 2025-03-10
Supplement: Supplementary file 3 [file f197da33daac435777afb574.xlsx]

## Sheet: Interactive Table
	INTERACTIVE TABLE:			#Interactive Table for analyzing P, P+LP, and P+LP+VUS-H variant count, carrier frequency, and genetic prevalence for 8 ethnic groups for a gene.
				#In order to prevent accidental destruction of the worksheet, it is locked, except for the YELLOW HIGHLIGHTED cells, so please write only in these cells.
				#To unlock the work sheet, under the Review tab click on to Unprotect Sheet with the password "1111".
					Step 1) Please write your gene name.		Step 2) Please write your desired inheritance pattern from the displayed modes (Click on the yellow cell and the arrow to see the drop-down list).
			Candidate for screening		Gene	Disease Mechanism	Select the Inheritance Mode								0
			Actionable Gene		BTD	LOF	AR	AR									5	13	21	29	37	45	53	61	69
																	6	14	22	30	38	46	54	62	70		SAMHD1	606754
						OMIM Link =>	609019										7	15	23	31	39	47	55	63	71		WARS1	191050
																	8	16	24	32	40	48	56	64	72		NARS1	108410
			P			P+LP			P+LP+VUS-H								9	17	25	33	41	49	57	65	73		SPR	182125
			Variant Count	CrF (1/x)	GP (1/x)	Variant Count	CrF (1/x)	GP (1/x)	Variant Count	CrF (1/x)	GP (1/x)						10	18	26	34	42	50	58	66	74		CILK1	612325
		African/African American (afr)	12	71	20101	30	57	12695	38	54	11652						11	19	27	35	43	51	59	67	75		CLCNKB	602023
		Admixed American (amr)	13	25	2442	34	24	2184	42	23	2108						12	20	28	36	44	52	60	68	76		EMC1	616846
		Ashkenazi Jewish (asj	3	16	919	6	16	913	6	16	913						Inheritance modes		Inheritance	Mechanism							MARS1	156560
		East Asian (eas)	13	406	656416	27	280	312648	38	203	164104						AR		AR	LOF							YARS1	603623
		Finnish (fin)	6	10	360	10	10	359	12	10	357																ARL3	604695
		Middle Eastern (mid	10	23	1969	12	22	1853	13	22	1825																PALS1	606958
		non-Finnish European (nfe)	38	12	519	124	12	485	165	11	477																HARS1	142810
		South Asian (sas)	16	9	314	44	9	298	52	9	297																RIGI	609631
																											H3-3A	601128
																											MTSS2	616951
																											EGR2	129010
																											VAMP1	185880
																											TBXT	601397
																											LORICRIN	152445
																											H4C3	602827
																											H4C5	602830
																											CFAP276	618682
																											H3-3B	601058
																											ATP5MC3	602736
																											ATP5F1AP1	-
																											CERT1	604677
																											H1-4	142220
																											H4C11	602826
																											ABCA4	601691
																											MEFV	608107
																											CFTR	602421
																											HBB	141900
																											TYR	606933
																											GJB2	121011
																											CYP1B1	601771
																											MPL	159530
																											CHD2	602119
																											USH2A	608400
																											CTH	607657
																											GNE	603824
																											SLFN14	614958
																											SLC22A5	603377
																											LRRK2	609007
																											MVK	251170
																											DHTKD1	614984
																											VWF	613160
																											ABCC6	603234
																											TTN	188840
																											LDLR	606945
																											SLC3A1	104614
																											PRRT2	614386
																											F11	264900
																											SEC23B	610512
																											CHEK2	604373
																											CAPN3	114240
																											FLG	135940
																											BRCA2	600185
																											ATM	607585
																											SPG7	602783
																											PKHD1	606702
																											DUOX2	606759
																											HBA1	141800
																											ABCB4	171060
																											TSHR	603372
																											MYO6	600970
																											NR2E3	604485
																											PALB2	610355
																											RPGRIP1	605446
																											MFN2	608507
																											LZTR1	600574
																											SLC5A2	182381
																											TNFRSF13B	604907
																											SLC34A1	182309
																											SLC7A9	604144
																											EPCAM	185535
																											CDK13	603309
																											NLRP12	609648
																											CYP11B1	610613
																											DNMT3A	602769
																											MYO7A	276903
																											BRCA1	113705
																											TTR	176300
																											CRYAA	123580
																											MFRP	606227
																											BEST1	607854
																											KCNQ1	607542
																											COL4A4	120131
																											MYBPC3	600958
																											EIF2AK4	609280
																											LAMA3	600805
																											SLC6A19	608893
																											ABCC8	600509
																											TTC21B	612014
																											CPT2	600650
																											SLC37A4	602671
																											MSH6	600678
																											BICRA	605690
																											COL17A1	113811
																											SLC12A6	604878
																											CCM2	607929
																											CACNA1S	114208
																											TMC1	606706
																											WNK4	601844
																											COL7A1	120120
																											BRIP1	605882
																											SRCAP	611421
																											CHRNE	100725
																											PDE6B	180072
																											COL4A3	120070
																											ASXL1	612990
																											LBR	600024
																											IFT140	614620
																											GLRA1	138491
																											CLCN1	118425
																											CHRND	100720
																											RAD51D	602954
																											EVC2	607261
																											RAG1	179615
																											AIRE	607358
																											EVC	604831
																											HSPB1	602195
																											CRYBB1	600929
																											DMXL2	612186
																											RDH12	608830
																											CDKN2A	600160
																											PROM1	604365
																											RNF213	613768
																											CPT1C	608846
																											CRB1	604210
																											SYNE2	608442
																											OPA3	606580
																											GUCY2C	601330
																											CRYGD	123690
																											CNTNAP2	604569
																											LHCGR	152790
																											FIG4	609390
																											SPTA1	182860
																											ELP1	603722
																											NTRK1	191315
																											LPL	609708
																											CCDC50	611051
																											COL9A1	120210
																											CYP11B2	124080
																											TBC1D1	609850
																											SH3TC2	608206
																											ERCC6	609413
																											MME	120520
																											ALPL	171760
																											DSP	125647
																											GUCY2D	600179
																											RDH5	601617
																											POLG	174763
																											ABCA1	600046
																											PMS2	600259
																											LAMB3	150310
																											CNGA1	123825
																											BLK	191305
																											FGA	134820
																											ITGB3	173470
																											PCSK9	607786
																											MAT1A	610550
																											TSC1	605284
																											DNM1	602377
																											SMARCC2	601734
																											FOXG1	164874
																											TGFB2	190220
																											PAFAH1B1	601545
																											F13B	134580
																											HNRNPU	602869
																											ARFGEF1	604141
																											HCN2	602781
																											F12	610619
																											GDF1	602880
																											TRIO	601893
																											ESPN	606351
																											POLE	174762
																											MSX1	142983
																											SCN4A	603967
																											QRICH1	617387
																											KCNH2	152427
																											MYH10	160776
																											MYH7	160760
																											CEACAM16	614591
																											WFS1	606201
																											BFSP2	603212
																											KRT17	148069
																											MYLK	600922
																											CRYBB3	123630
																											CDK19	614720
																											VDR	601769
																											COMP	600310
																											TNNI3	191044
																											FREM1	608944
																											LMNA	150330
																											TCF12	600480
																											SLC6A5	604159
																											NPRL3	600928
																											ADCY5	600293
																											COL12A1	120320
																											ALG8	608103
																											DICER1	606241
																											TRPM4	606936
																											NEFL	162280
																											LRP4	604270
																											DSTYK	612666
																											LRSAM1	610933
																											POR	124015
																											SPAST	604277
																											WNT10A	606268
																											AQP2	107777
																											IMPDH1	146690
																											DOK7	610285
																											PROC	612283
																											POGLUT1	615618
																											SDHA	600857
																											CAMTA1	611501
																											WDFY3	617485
																											GRIN1	138249
																											TMEM63A	618685
																											CRYBA4	123631
																											HESX1	601802
																											IMPG2	607056
																											KIAA1549	613344
																											KCNQ4	603537
																											GLMN	601749
																											NF1	613113
																											GGCX	137167
																											FBN2	612570
																											DEAF1	602635
																											POLR3B	614366
																											ADGRG1	604110
																											RAD51C	602774
																											SCNN1B	600760
																											GCH1	600225
																											THAP1	609520
																											FLCN	607273
																											ANO3	610110
																											KIDINS220	615759
																											CSNK2A1	115440
																											OSBPL2	606731
																											PLEC	601282
																											COL1A2	120160
																											GANAB	104160
																											COCH	603196
																											ENG	131195
																											APOA1	107680
																											RAPSN	601592
																											MC4R	155541
																											EFHC1	608815
																											LIFR	151443
																											HAX1	605998
																											COL6A3	120250
																											RET	164761
																											GDAP1	606598
																											PKP2	602861
																											RGR	600342
																											PRPH2	179605
																											PTEN	601728
																											APOB	107730
																											PRX	605725
																											FBN1	134797
																											ZNF335	610827
																											SDHB	185470
																											MLH1	120436
																											ANK2	106410
																											NSD1	606681
																											RELN	600514
																											PEX6	601498
																											BAG3	603883
																											POLR3A	614258
																											MYH2	160740
																											NLRP7	609661
																											LAMB2	150325
																											SDCCAG8	613524
																											BAP1	603089
																											ENPP1	173335
																											CTSA	613111
																											MYH6	160710
																											UROD	613521
																											COL9A3	120270
																											MYL2	160781
																											COL4A1	120130
																											IYD	612025
																											SMARCA4	603254
																											ALG9	606941
																											SLC2A1	138140
																											SPTBN1	182790
																											NRL	162080
																											NOBOX	610934
																											KMT2A	159555
																											ACTG2	102545
																											PRKAG2	602743
																											ACTC1	102540
																											DUOXA2	612772
																											CLRN1	606397
																											DHDDS	608172
																											KRT14	148066
																											OPTN	602432
																											SCO2	604272
																											RHO	180380
																											NEK1	604588
																											TBX6	602427
																											POLD1	174761
																											HBA2	141850
																											TOR1A	605204
																											RTEL1	608833
																											NBN	602667
																											VCL	193065
																											PYCR1	179035
																											COL6A2	120240
																											EIF2B1	606686
																											NPR2	108961
																											MATN3	602109
																											ROR2	602337
																											CREB3L3	611998
																											TP53	191170
																											KRT16	148067
																											SLC4A11	610206
																											NAGLU	609701
																											PIEZO2	613629
																											PKD1	601313
																											SPTBN2	604985
																											EPHB4	600011
																											FLNC	102565
																											MSH2	609309
																											SERPINC1	107300
																											TGFBI	601692
																											SCN5A	600163
																											RRM2B	604712
																											KCNMA1	600150
																											DEPDC5	614191
																											HPD	609695
																											RYR2	180902
																											ENAM	606585
																											KDM5B	605393
																											COL2A1	120140
																											ACVRL1	601284
																											PIK3R2	603157
																											GCK	138079
																											SYNE1	608441
																											LRP5	603506
																											KRT5	148040
																											KHDC3L	611687
																											CHRNA1	100690
																											KMT2D	602113
																											SPEN	613484
																											DNA2	601810
																											COL1A1	120150
																											RB1	614041
																											ROBO1	602430
																											ERF	611888
																											PARN	604212
																											SETD1B	611055
																											EED	605984
																											XPR1	605237
																											PLCB4	600810
																											KIF1A	601255
																											SCN1A	182389
																											TANC2	615047
																											ZNF292	616213
																											ATP2B1	108731
																											POT1	606478
																											HSF4	602438
																											HNF1A	142410
																											SEC63	608648
																											CSF1R	164770
																											HNF4A	600281
																											COL11A1	120280
																											REEP2	609347
																											WDR11	606417
																											COL6A1	120220
																											GLI3	165240
																											SCN2A	182390
																											FH	136850
																											DNAJB11	611341
																											TWNK	606075
																											RBBP8	604124
																											DDR2	191311
																											DDX41	608170
																											ITPA	147520
																											FOXP1	605515
																											PPM1D	605100
																											COG4	606976
																											F2	176930
																											ARID1A	603024
																											POLR2A	180660
																											MRAS	608435
																											SMAD6	602931
																											WDR26	617424
																											EBF3	607407
																											CDKN1C	600856
																											FOXE3	601094
																											TOP2B	126431
																											FBXO11	607871
																											KMT2C	606833
																											PRKACB	176892
																											MED13	603808
																											FAR1	616107
																											AHDC1	615790
																											OPA1	605290
																											COPA	601924
																											NBEA	604889
																											FBRSL1	620123
																											STXBP2	601717
																											ATP6V0A1	192130
																											SHANK3	606230
																											ACTL6A	604958
																											SON	182465
																											TNNC1	191040
																											PUF60	604819
																											IRF2BPL	611720
																											UFSP2	611482
																											NALCN	611549
																											GBF1	603698
																											PKD2	173910
																											ASH1L	607999
																											KPNA3	601892
																											PAX3	606597
																											PHIP	612870
																											NAA15	608000
																											RCBTB1	607867
																											CELSR1	604523
																											SMCHD1	614982
																											THRA	190120
																											EZH2	601573
																											KIF5C	604593
																											CAMK2B	607707
																											ARFGEF3	617411
																											GABRB1	137190
																											ZMIZ1	607159
																											PAX5	167414
																											CDC73	607393
																											NOTCH3	600276
																											ABCC9	601439
																											TNRC6B	610740
																											MYOT	604103
																											SLC12A5	606726
																											NOTCH1	190198
																											F13A1	134570
																											CTNNA1	116805
																											GABRB2	600232
																											HPGD	601688
																											IMPG1	602870
																											SMARCE1	603111
																											MAP3K1	600982
																											EDNRB	131244
																											GRHL3	608317
																											AFG3L2	604581
																											SEC61A1	609213
																											PSTPIP1	606347
																											PADI6	610363
																											SPRED1	609291
																											SLC40A1	604653
																											SGCD	601411
																											STAT5B	604260
																											ITGB4	147557
																											COL3A1	120180
																											GHR	600946
																											EPHA2	176946
																											EXT1	608177
																											VCAN	118661
																											TRPC6	603652
																											FGF14	601515
																											ALB	103600
																											DES	125660
																											CDK8	603184
																											CAPRIN1	601178
																											CDH2	114020
																											KIT	164920
																											MYBPC1	160794
																											MYH14	608568
																											COL9A2	120260
																											NIPBL	608667
																											ALDH18A1	138250
																											FGG	134850
																											ACTA1	102610
																											CFH	134370
																											CDKN1B	600778
																											ACAN	155760
																											JAG1	601920
																											FLNB	603381
																											REN	179820
																											POFUT1	607491
																											EDN3	131242
																											DYNC1H1	600112
																											DNM1L	603850
																											TRAF7	606692
																											PRPF8	607300
																											MAPK8IP3	605431
																											ATP8B1	602397
																											SCN9A	603415
																											C19orf12	614297
																											CYP11A1	118485
																											GNAT1	139330
																											MYH3	160720
																											NLRP2	609364
																											ITPR1	147265
																											PTCH1	601309
																											TERT	187270
																											CASR	601199
																											ADAR	146920
																											TSC2	191092
																											IDH1	147700
																											VPS16	608550
																											MACF1	608271
																											SNRNP200	601664
																											PRNP	176640
																											THRB	190160
																											NEUROD1	601724
																											DVL3	601368
																											COL10A1	120110
																											SHH	600725
																											ITGA2B	607759
																											AIPL1	604392
																											TECTA	602574
																											SLC34A3	609826
																											CFI	217030
																											PIGT	610272
																											CLPB	616254
																											RP1	603937
																											F7	613878
																											UNC119	604011
																											NEK8	609799
																											APOA5	606368
																											EDAR	604095
																											PROS1	176880
																											COL5A2	120190
																											TGM6	613900
																											DSG2	125671
																											PLIN1	170290
																											CD46	120920
																											FGB	134830
																											COL11A2	120290
																											TRPV3	607066
																											RHAG	180297
																											PHKG2	172471
																											SPINK1	167790
																											COL4A2	120090
																											RLBP1	180090
																											CHRNB1	100710
																											MMP13	600108
																											SCN1B	600235
																											GP1BA	606672
																											POLRMT	601778
																											AICDA	605257
																											CASP10	601762
																											NEXN	613121
																											PDE11A	604961
																											VHL	608537
																											GRN	138945
																											HTRA1	602194
																											APC	611731
																											WASHC5	610657
																											BEAN1	612051
																											KIF22	603213
																											LDB3	605906
																											KCNJ11	600937
																											ROBO4	607528
																											ABCB6	605452
																											DSC2	125645
																											PKLR	609712
																											POU1F1	173110
																											DNAJB6	611332
																											CRELD1	607170
																											KLHL7	611119
																											CACNA1A	601011
																											LAMB1	150240
																											LTBP3	602090
																											LTBP2	602091
																											HR	602302
																											ATP1A2	182340
																											ANK1	612641
																											KLF1	600599
																											MYPN	608517
																											ROM1	180721
																											TNNI3K	613932
																											SQSTM1	601530
																											OSMR	601743
																											GPHN	603930
																											TNNT2	191045
																											FGFR1	136350
																											IDH2	147650
																											PIKFYVE	609414
																											APP	104760
																											SPTB	182870
																											ACTN1	102575
																											FHOD3	609691
																											TBK1	604834
																											SDHD	602690
																											HNF1B	189907
																											CNOT3	604910
																											PITX3	602669
																											PNKD	609023
																											CDH1	192090
																											EYA4	603550
																											BPTF	601819
																											SMARCA2	600014
																											ZMYM2	602221
																											WNT1	164820
																											TARDBP	605078
																											EPB41	130500
																											RBP4	180250
																											PSEN1	104311
																											FZD4	604579
																											KRT6A	148041
																											IFNGR1	107470
																											EDARADD	606603
																											MEN1	613733
																											HBD	142000
																											ARMC5	615549
																											SLC2A9	606142
																											ACTN2	102573
																											SGCE	604149
																											ARID1B	614556
																											TFG	602498
																											CHD3	602120
																											CPOX	612732
																											PLG	173350
																											KRIT1	604214
																											MAST1	612256
																											NOP56	614154
																											PPOX	600923
																											SHANK2	603290
																											JUP	173325
																											KCNQ2	602235
																											KANSL1	612452
																											PSAP	176801
																											MSTO1	617619
																											TCF3	147141
																											PSMB8	177046
																											KRT12	601687
																											TCAP	604488
																											NRXN1	600565
																											SLC4A1	109270
																											MPZ	159440
																											KIF21A	608283
																											CHD5	610771
																											HTT	613004
																											MYRF	608329
																											INSR	147670
																											NOD2	605956
																											AP4E1	607244
																											COL5A1	120215
																											GCM2	603716
																											CRX	602225
																											INF2	610982
																											GDF5	601146
																											ANXA11	602572
																											PLXNA1	601055
																											LMBR1	605522
																											SLC20A2	158378
																											KCNT2	610044
																											TPM1	191010
																											TSPAN12	613138
																											EXT2	608210
																											SLC25A4	103220
																											RASA1	139150
																											PLN	172405
																											ELANE	130130
																											ERLIN2	611605
																											HK1	142600
																											KDM5A	180202
																											ADNP	611386
																											HSPA9	600548
																											CHD8	610528
																											SLC16A1	600682
																											PRKCSH	177060
																											FOXI3	612351
																											MIP	154050
																											KIF23	605064
																											HECW2	617245
																											POLG2	604983
																											MYH11	160745
																											ACTA2	102620
																											GJB3	603324
																											SETD1A	611052
																											CHD7	608892
																											CRYBA1	123610
																											SRRM2	606032
																											ACO2	100850
																											CSRP3	600824
																											SLC12A2	600840
																											PTPN4	176878
																											LEMD3	607844
																											ANKRD11	611192
																											GATM	602360
																											APOC2	608083
																											LMX1A	600298
																											SPECC1L	614140
																											SPTLC2	605713
																											DCTN1	601143
																											SPTAN1	182810
																											VCP	601023
																											KCNQ3	602232
																											DCN	125255
																											GATA3	131320
																											SEMA6B	608873
																											KMT2B	606834
																											DHX37	617362
																											SKI	164780
																											ALG5	604565
																											DCC	120470
																											SETD5	615743
																											SMO	601500
																											FOXN1	600838
																											SCN3A	182391
																											FTL	134790
																											STUB1	607207
																											RAX2	610362
																											CHD4	603277
																											DLL1	606582
																											TUBB1	612901
																											GLI2	165230
																											MBD5	611472
																											RHOBTB2	607352
																											IGF1R	147370
																											TGFBR1	190181
																											FBXW7	606278
																											REEP1	609139
																											PPP1R12A	602021
																											NEDD4L	606384
																											PIK3R1	171833
																											RERE	605226
																											CTCF	604167
																											ERBB4	600543
																											FLT4	136352
																											ADD1	102680
																											STAT1	600555
																											BSCL2	606158
																											PDE10A	610652
																											ANK3	600465
																											CEP85L	618865
																											SMAD3	603109
																											ATL1	606439
																											FN1	135600
																											FAS	134637
																											ATXN10	611150
																											FBLN5	604580
																											SCN8A	600702
																											LMX1B	602575
																											GRIN2A	138253
																											EHMT1	607001
																											PAX2	167409
																											ELOVL4	605512
																											NOTCH2	600275
																											RBM20	613171
																											GJC2	608803
																											RORB	601972
																											EYA1	601653
																											PTH1R	168468
																											GSN	137350
																											KIF5A	602821
																											CRYAB	123590
																											SIX1	601205
																											KAT8	609912
																											KCNN2	605879
																											FOXC1	601090
																											DVL1	601365
																											LOX	153455
																											KCNC3	176264
																											DNM2	602378
																											CUX1	116896
																											C1QTNF5	608752
																											HCN4	605206
																											KCNJ2	600681
																											DPP6	126141
																											RAD21	606462
																											BRSK2	609236
																											NSD2	602952
																											CUL3	603136
																											CHRNB2	118507
																											CRYBB2	123620
																											GRM1	604473
																											RUNX1	151385
																											SUFU	607035
																											WT1	607102
																											CRYGS	123730
																											FGF8	600483
																											STT3A	601134
																											GABRG2	137164
																											PMP22	601097
																											SCAF4	616023
																											KDM4B	609765
																											RRAGD	608268
																											TRIP12	604506
																											CREBBP	600140
																											CTNND1	601045
																											IFNGR2	147569
																											PRDM13	616741
																											MFAP5	601103
																											MYH9	160775
																											ACVR1	102576
																											ATP6V1B2	606939
																											ANKRD17	615929
																											ZBTB7A	605878
																											ARID2	609539
																											ARHGAP29	610496
																											NR5A1	184757
																											DCHS1	603057
																											CAV3	601253
																											WDR37	618586
																											KLHL3	605775
																											BMPR1A	601299
																											ELN	130160
																											CEL	114840
																											GRIN2B	138252
																											NCSTN	605254
																											TGFB3	190230
																											KMT2E	608444
																											PACS2	610423
																											SUZ12	606245
																											STAG1	604358
																											MYT1L	613084
																											TGFB1	190180
																											SETBP1	611060
																											TCF7L2	602228
																											ZMYND11	608668
																											PPARG	601487
																											WNT10B	601906
																											DNMT1	126375
																											TEK	600221
																											SIM1	603128
																											PHF21A	608325
																											SDHC	602413
																											ASXL3	615115
																											MITF	156845
																											ATP6V1A	607027
																											AFF3	601464
																											TCOF1	606847
																											GRHL2	608576
																											THPO	600044
																											IRF6	607199
																											TMEM43	612048
																											GH1	139250
																											GJA8	600897
																											ZNF148	601897
																											LMBRD2	619490
																											NEFH	162230
																											GABRA5	137142
																											SLC33A1	603690
																											MAGEL2	605283
																											DYRK1A	600855
																											IHH	600726
																											GNAL	139312
																											AMOTL1	614657
																											PDCD10	609118
																											SRP72	602122
																											RTN2	603183
																											KCND2	605410
																											RAI1	607642
																											PRKCG	176980
																											GATA6	601656
																											RAD51	179617
																											RELA	164014
																											RUNX2	600211
																											TNPO3	610032
																											EP300	602700
																											ETV6	600618
																											PSEN2	600759
																											CTR9	609366
																											ZEB1	189909
																											ACTG1	102560
																											CRYGC	123680
																											TGFBR2	190182
																											FOXL2	605597
																											PDE4D	600129
																											ATP1A1	182310
																											VPS4A	609982
																											SMC3	606062
																											TUBB3	602661
																											CHMP2B	609512
																											BRD4	608749
																											UBA2	613295
																											MAPRE2	605789
																											GABRB3	137192
																											PUM1	607204
																											TFAP2B	601601
																											HEPACAM	611642
																											TBX1	602054
																											NKX2-1	600635
																											SCNN1G	600761
																											DAGLA	614015
																											SOX6	607257
																											PPP2R5D	601646
																											TINF2	604319
																											GNB2	139390
																											TLK2	608439
																											LGI1	604619
																											GATA4	600576
																											PRKAR1A	188830
																											TMEM127	613403
																											BFSP1	603307
																											GATA2	137295
																											ZNF462	617371
																											POMP	613386
																											POU3F3	602480
																											KCNQ5	607357
																											GRID2	602368
																											THBD	188040
																											LHX2	603759
																											KIF11	148760
																											SHANK1	604999
																											TWIST2	607556
																											POGZ	614787
																											KMT5B	610881
																											PHACTR1	608723
																											WDR5	609012
																											KCNC1	176258
																											GJA3	121015
																											STK11	602216
																											NLRP5	609658
																											GNAI1	139310
																											ZNF408	616454
																											TAOK1	610266
																											ARCN1	600820
																											CACNA1G	604065
																											CSNK2B	115441
																											NFAT5	604708
																											PPP2R1A	605983
																											HMBS	609806
																											MYCN	164840
																											TBX4	601719
																											EFEMP1	601548
																											TMEM98	615949
																											CAV1	601047
																											LHX4	602146
																											APOA2	107670
																											CHD1	602118
																											GRIA2	138247
																											SOX10	602229
																											PPP3CA	114105
																											ASXL2	612991
																											KIF2A	602591
																											ROBO2	602431
																											SYNGAP1	603384
																											TUBG1	191135
																											DSPP	125485
																											PDE8B	603390
																											MEIS2	601740
																											TUBB4A	602662
																											PRPF31	606419
																											GATAD2B	614998
																											SATB1	602075
																											SET	600960
																											HDAC4	605314
																											NPRL2	607072
																											AGO1	606228
																											KDM1A	609132
																											GNB1	139380
																											TOPORS	609507
																											FLI1	193067
																											ANKH	605145
																											NR3C2	600983
																											REST	600571
																											SDHAF2	613019
																											KAT6B	605880
																											LYZ	153450
																											DPYSL5	608383
																											MVD	603236
																											SETD2	612778
																											SMARCD1	601735
																											SF3B2	605591
																											AP1G1	603533
																											CNOT1	604917
																											GREB1L	617782
																											KDM3B	609373
																											TBL1XR1	608628
																											ALK	105590
																											ARIH1	605624
																											RRAS2	600098
																											GRIA4	138246
																											PAX8	167415
																											CAMK2A	114078
																											LMNB1	150340
																											SMARCC1	601732
																											MAP1B	157129
																											MAP3K7	602614
																											PAX9	167416
																											UBAP2L	616472
																											APPL1	604299
																											NFKB2	164012
																											MECOM	165215
																											USP7	602519
																											KRT74	608248
																											TNPO2	603002
																											CLTC	118955
																											TFAP2A	107580
																											KCTD17	616386
																											BRPF1	602410
																											FUS	137070
																											RARB	180220
																											BMPR1B	603248
																											SFTPA1	178630
																											TWIST1	601622
																											PRPF3	607301
																											GFI1B	604383
																											FGF10	602115
																											TTBK2	611695
																											PROKR2	607123
																											MYL3	160790
																											AAGAB	614888
																											DLG4	602887
																											TBR1	604616
																											NOVA2	601991
																											STX1B	601485
																											CALM3	114183
																											JARID2	601594
																											BICD2	609797
																											ZCCHC8	616381
																											POLR1D	613715
																											SRP54	604857
																											DLL4	605185
																											WBP11	618083
																											NF2	607379
																											POLR3C	617454
																											SIX3	603714
																											DDX6	600326
																											SLC39A14	608736
																											GABRA1	137160
																											TNFRSF1A	191190
																											RFX4	603958
																											CIC	612082
																											ACTN4	604638
																											SYT1	185605
																											RORA	600825
																											NFKB1	164011
																											GDF2	605120
																											TET3	613555
																											NFIA	600727
																											HOXD13	142989
																											INS	176730
																											UBAP1	609787
																											EFTUD2	603892
																											SLC6A1	137165
																											FOXP2	605317
																											KDM6B	611577
																											SMARCB1	601607
																											DGCR8	609030
																											UCHL1	191342
																											NR3C1	138040
																											SLC17A8	607557
																											AUTS2	607270
																											TCF4	602272
																											EDNRA	131243
																											OTX2	600037
																											DVL2	602151
																											MATR3	164015
																											TNFAIP3	191163
																											POLR1A	616404
																											PAX6	607108
																											CAT	115500
																											TRPS1	604386
																											AP2S1	602242
																											TAF4	601796
																											AIP	605555
																											HLA-B	142830
																											ANGPTL6	609336
																											RNF43	612482
																											NR2F2	107773
																											WASF1	605035
																											ZBTB20	606025
																											PURA	600473
																											GNB4	610863
																											EEF1A2	602959
																											WAC	615049
																											ERBIN	606944
																											SREBF1	184756
																											MNX1	142994
																											RNF170	614649
																											GABRA2	137140
																											NKX2-5	600584
																											STXBP1	602926
																											CASQ1	114250
																											NODAL	601265
																											BCL11B	606558
																											ZFHX4	606940
																											FZR1	603619
																											SIN3A	607776
																											MEF2C	600662
																											AGO2	606229
																											LMNB2	150341
																											CHRNA2	118502
																											BCL11A	606557
																											TBX18	604613
																											JPH2	605267
																											AXIN2	604025
																											KRT6B	148042
																											FBXW11	605651
																											AKT3	611223
																											KAT6A	601408
																											DDB1	600045
																											PRPF6	613979
																											PBX1	176310
																											CFHR4	605337
																											SNAP25	600322
																											YAP1	606608
																											TRPM3	608961
																											PSMB9	177045
																											GABBR2	607340
																											NOG	602991
																											CDH15	114019
																											SMAD2	601366
																											P2RX2	600844
																											CRIM1	606189
																											BMP2	112261
																											GIGYF1	612064
																											FASLG	134638
																											NTRK2	600456
																											MYH8	160741
																											SOX5	604975
																											CTNNB1	116806
																											ATP2C1	604384
																											SERPING1	606860
																											SALL1	602218
																											TBX5	601620
																											SERPINE1	173360
																											DLG5	604090
																											TUBA1A	602529
																											KCNA2	176262
																											NR2F1	132890
																											KRT2	600194
																											PDGFRA	173490
																											NFIX	164005
																											AVP	192340
																											WNT4	603490
																											SOX18	601618
																											IFITM5	614757
																											PLAG1	603026
																											YY1	600013
																											CELF2	602538
																											SATB2	608148
																											HNRNPD	601324
																											CUX2	610648
																											NFIB	600728
																											TMEM240	616101
																											PRR12	616633
																											ATN1	607462
																											RAC1	602048
																											ATP6V0C	108745
																											FBXO28	609100
																											STXBP3	608339
																											SOX11	600898
																											HSPB8	608014
																											KAT5	601409
																											CLCN3	600580
																											SLC25A24	608744
																											SERPINI1	602445
																											TBXA2R	188070
																											USP48	617445
																											PSMD12	604450
																											PITX1	602149
																											PTHLH	168470
																											VEGFC	601528
																											ATXN3	607047
																											RFX3	601337
																											TBP	600075
																											HNRNPK	600712
																											GUCA1B	602275
																											KCNJ13	603208
																											CCDC78	614666
																											KDR	191306
																											PRPF4	607795
																											RBPJ	147183
																											TBX3	601621
																											C9orf72	614260
																											TUBB2B	612850
																											RPL13	113703
																											PRKD1	605435
																											FOXP4	608924
																											KCTD1	613420
																											ARF1	103180
																											SOX9	608160
																											SOST	605740
																											DROSHA	608828
																											CALM1	114180
																											CALM2	114182
																											RANBP2	601181
																											COPB2	606990
																											SLC20A1	137570
																											KIF21B	608322
																											CSNK1G1	606274
																											KIF5B	602809
																											IL17F	606496
																											DDX23	612172
																											FRMD5	616309
																											TRIM8	606125
																											RPS19	603474
																											MN1	156100
																											HNRNPH1	601035
																											MYT1	600379
																											TRAF3	601896
																											GABBR1	603540
																											POLR1B	602000
																											SUPT16H	605012
																											TIMP3	188826
																											VAPB	605704
																											ACD	609377
																											HNRNPA1	164017
																											SEMA3E	608166
																											ARHGAP35	605277
																											PRRX1	167420
																											SHROOM3	604570
																											SYT2	600104
																											ZEB2	605802
																											NR4A2	601828
																											IRF8	601565
																											SLC6A20	605616
																											HSPD1	118190
																											ARPC4	604226
																											KRT1	139350
																											EDN1	131240
																											MAF	177075
																											ACVR2B	602730
																											NCDN	608458
																											SEMA3F	601124
																											ARF3	103190
																											TBX20	606061
																											LITAF	603795
																											MAB21L2	604357
																											KCNJ5	600734
																											ZMYND8	615713
																											B2M	109700
																											TAB2	605101
																											SALL4	607343
																											DSG1	125670
																											CEBPA	116897
																											KRT9	607606
																											KLHL24	611295
																											TRIM28	601742
																											SLC25A11	604165
																											AQP5	600442
																											SLURP1	606119
																											RPS28	603685
																											FDPS	134629
																											CYLD	605018
																											MAX	154950
																											RPS15	180535
																											CDK4	123829
																											KRT10	148080
																											KRT6C	612315
																											SASH1	607955
																											ADAM10	602192
																											IL36RN	605507
																											GJB6	604418
																											EPOR	133171
																											GP1BB	138720
																											BPGM	613896
																											EGLN1	606425
																											SERPIND1	142360
																											PLAT	173370
																											ATXN2	601517
																											SOX4	184430
																											CFHR2	600889
																											HLA-DRB1	142857
																											FAM111B	615584
																											CRYM	123740
																											HRG	142640
																											CFHR1	134371
																											ATXN7	607640
																											CFHR3	605336
																											GNA14	604397
																											MPEG1	610390
																											PLS1	602734
																											GNAI3	139370
																											FOXF1	601089
																											MUC5B	600770
																											GJB4	605425
																											KBTBD13	613727
																											UBIAD1	611632
																											TPSAB1	191080
																											CELA3B	618694
																											ELOVL5	611805
																											PRKAR1B	176911
																											BNC2	608669
																											KCNE1	176261
																											POU3F2	600494
																											ATL3	609369
																											TLR3	603029
																											SFTPA2	178642
																											KRT3	148043
																											BHLHA9	615416
																											VSX1	605020
																											CSDE1	191510
																											NRXN2	600566
																											APOL1	603743
																											LEMD2	616312
																											KLB	611135
																											DISP1	607502
																											IGF2	147470
																											SMARCA5	603375
																											MYLK3	612147
																											IMPDH2	146691
																											FCGR2A	146790
																											PROK1	606233
																											CACNB4	601949
																											MTAP	156540
																											BMP4	112262
																											NPM1	164040
																											DNAJC5	611203
																											PDYN	131340
																											CDON	608707
																											KCNA1	176260
																											ITM2B	603904
																											FAM111A	615292
																											CNNM2	607803
																											VKORC1	608547
																											DPF2	601671
																											GHSR	601898
																											STN1	613128
																											VIM	193060
																											VPS35	601501
																											CDX1	600746
																											POLR3F	617455
																											BMP6	112266
																											SOCS1	603597
																											ISCU	611911
																											KCNN4	602754
																											TLL1	606742
																											SLC16A12	611910
																											UBE3A	601623
																											TNNC2	191039
																											IL18BP	604113
																											OVOL2	616441
																											SIX5	600963
																											MYOCD	606127
																											FZD2	600667
																											IRF3	603734
																											MED13L	608771
																											HOXA11	142958
																											KDM2B	609078
																											GABRD	137163
																											TUBB4B	602660
																											GPR161	612250
																											RPL35A	180468
																											PHOX2B	603851
																											CNOT2	604909
																											CLDN5	602101
																											CAMK4	114080
																											RP9	607331
																											NAF1	617868
																											PODXL	602632
																											FBXO31	609102
																											SCAMP5	613766
																											RNF125	610432
																											RHOA	165390
																											FZD5	601723
																											SIX2	604994
																											IRF4	601900
																											SGMS2	611574
																											CCL5	187011
																											POU4F3	602460
																											POU4F1	601632
																											PPP2R2B	604325
																											IRF2BP2	615332
																											COL8A2	120252
																											FCGR3B	610665
																											SF3B4	605593
																											PRICKLE1	608500
																											TICAM1	607601
																											CDSN	602593
																											UPF1	601430
																											SP6	608613
																											KCNK3	603220
																											PCGF2	600346
																											HOXA13	142959
																											TUBB	191130
																											HIVEP2	143054
																											MAFB	608968
																											HNRNPA2B1	600124
																											CTNND2	604275
																											IL17A	603149
																											SAMD12	618073
																											PROKR1	607122
																											DLX3	600525
																											CHCHD2	616244
																											NDNF	616506
																											TPM4	600317
																											TRIM71	618570
																											ZNF423	604557
																											SOX2	184429
																											KLHL20	617679
																											APCDD1	607479
																											DLST	126063
																											TNF	191160
																											CNBP	116955
																											YWHAG	605356
																											EIF5A	600187
																											ATXN1	601556
																											FAM83H	611927
																											FOXC2	602402
																											FOXJ1	602291
																											FOXD3	611539
																											UBTF	600673
																											MAP3K3	602539
																											TUBB2A	615101
																											TMEM106B	613413
																											NPTX1	602367
																											PFN1	176610
																											VAMP2	185881
																											EEF2	130610
																											JPH3	605268
																											SIN3B	607777
																											RPL31	617415
																											SLC32A1	616440
																											SSBP1	600439
																											NCKAP1	604891
																											SOX17	610928
																											PTH	168450
																											RFX7	612660
																											SNRPB	182282
																											FGF9	600921
																											SLC5A7	608761
																											CDX2	600297
																											DLX5	600028
																											ANG	105850
																											ASPRV1	611765
																											BACH2	605394
																											CHAMP1	616327
																											DHX30	616423
																											FOXA2	600288
																											HOXA2	604685
																											KCNK9	605874
																											KLF7	604865
																											MSX2	123101
																											PACS1	607492
																											PRICKLE2	608501
																											RAB7A	602298
																											TGIF1	602630
																											ZIC2	603073
																											ACTB	102630
																											AKT2	164731
																											AP2M1	601024
																											C1R	613785
																											CCL2	158105
																											CFC1	605194
																											CLDN11	601326
																											CTBP1	602618
																											CTLA4	123890
																											CXCR4	162643
																											CYCS	123970
																											DYRK1B	604556
																											ELOVL1	611813
																											EMX2	600035
																											FEM1C	608767
																											GDF11	603936
																											GDF6	601147
																											GFI1	600871
																											GRIA1	138248
																											H19	103280
																											HBG1	142200
																											HBG2	142250
																											HMGA2	600698
																											HMGB1	163905
																											HNRNPDL	607137
																											HNRNPR	607201
																											IKZF1	603023
																											IKZF2	606234
																											IKZF3	606221
																											IKZF5	606238
																											IL6	147620
																											KCNB1	600397
																											KCNJ6	600877
																											MIR17HG	609415
																											MIR184	613146
																											MSL2	614802
																											MUC1	158340
																											NACC1	610672
																											NEUROD2	601725
																											NIPA1	608145
																											NUS1	610463
																											P4HB	176790
																											PDGFB	190040
																											PITX2	601542
																											PPP1CB	600590
																											PPP2CA	176915
																											PSENEN	607632
																											RAB11A	605570
																											RAB11B	604198
																											RHEB	601293
																											RPL11	604175
																											RPL15	604174
																											RPL23	603662
																											RPL26	603704
																											RPL27	607526
																											RPL36	617893
																											RPL5	603634
																											RPL9	603686
																											RPS10	603632
																											RPS17	180472
																											RPS23	603683
																											RPS24	602412
																											RPS26	603701
																											RPS27	603702
																											RPS27A	191343
																											RPS29	603633
																											RPS7	603658
																											RPSA	150370
																											SIAH1	602212
																											SIK1	605705
																											SNORA31	619378
																											SNRPE	128260
																											SS18L1	606472
																											SYNCRIP	616686
																											TCF20	603107
																											TERC	602322
																											TMEM163	618978
																											TNFSF12	602695
																											TRA2B	602719
																											U2AF2	191318
																											WNT5A	164975
																											ZBTB18	608433
																											ZFP57	612192
																											ZIC1	600470
																											ZNF750	610226
																											GBA1	606463
																											ANO5	608662
																											RYR1	180901
																											TBC1D24	613577
																											AARS1	601065
																											TREX1	606609
																											C3	120700
																											CLCN7	602727
																											APOE	107741
																											CLCN2	600570
																											ACTL6B	612458
																											GRIK2	138244
																											DIAPH1	602121
																											IFIH1	606951
																											PIK3CD	602839
																											RAC2	602049
																											GARS1	600287
																											JAK1	147795
																											SETX	608465
																											ATAD3A	612316
																											ACOX1	609751
																											IKBKB	603258
																											RIPK1	603453
																											FGF23	605380
																											SCNN1A	600228
																											STIM1	605921
																											GSDME	608798
																											CARD11	607210
																											CFB	138470
																											STING1	612374
																											WNK1	605232
																											C1S	120580
																											CCDC88C	611204
																											CEBPE	600749
																											CFHR5	608593
																											NLRP1	606636
																											ORAI1	610277
																											TNFRSF11A	603499
																											F5	612309
																											FGFR3	134934
																											MORC2	616661
																											GJA1	121014
																											HRAS	190020
																											PTPN11	176876
																											GNAS	139320
																											NRAS	164790
																											CBL	165360
																											SHOC2	602775
																											SMAD4	600993
																											MYOC	601652
																											SAMD9	610456
																											SOD1	147450
																											PRSS1	276000
																											SOS1	182530
																											KRAS	190070
																											SPTLC1	605712
																											CACNA1C	114205
																											CCND2	123833
																											UMOD	191845
																											FGFR2	176943
																											RIT1	609591
																											TRPV4	605427
																											BRAF	164757
																											MAP2K2	601263
																											MAPT	157140
																											SH3BP2	602104
																											GNAO1	139311
																											KCNT1	608167
																											TP63	603273
																											PIK3CA	171834
																											NLRP3	606416
																											GUCA1A	600364
																											TNNI2	191043
																											ATP1A3	182350
																											STAT3	102582
																											PIEZO1	611184
																											CACNA1E	601013
																											KCNH5	605716
																											SCN11A	604385
																											PRKG1	176894
																											TNNT3	600692
																											HCN1	602780
																											KCNH1	603305
																											RALA	179550
																											SPOP	602650
																											ABL1	189980
																											KCND3	605411
																											RAF1	164760
																											MET	164860
																											EPAS1	603349
																											SCN10A	604427
																											CLCN6	602726
																											GLUD1	138130
																											CACNA1I	608230
																											JAK2	147796
																											CACNA1D	114206
																											GNA11	139313
																											PAK1	602590
																											CHRNA4	118504
																											ALPK1	607347
																											MTOR	601231
																											GFAP	137780
																											ALX4	605420
																											KCNC2	176256
																											CARD14	607211
																											MAPK1	176948
																											PTDSS1	612792
																											MAP2K1	176872
																											SOS2	601247
																											PDGFRB	173410
																											SNCA	163890
																											CYFIP2	606323
																											TIA1	603518
																											TRRAP	603015
																											CHMP4B	610897
																											DMPK	605377
																											KCNJ8	600935
																											NFE2L2	600492
																											PSMC5	601681
																											TPM3	191030
																											AFF4	604417
																											AKT1	164730
																											ANKRD26	610855
																											ARHGAP31	610911
																											CAMK2G	602123
																											CAPN5	602537
																											CCNF	600227
																											CDC42	116952
																											CHCHD10	615903
																											DAB1	603448
																											EIF2AK2	176871
																											EPO	133170
																											FGF12	601513
																											GMNN	602842
																											GNAQ	600998
																											GRIN2D	602717
																											KCNK4	605720
																											KCNN3	602983
																											KITLG	184745
																											NFKBIA	164008
																											NLRC4	606831
																											OAS1	164350
																											ODC1	165640
																											PDE3A	123805
																											PLAU	191840
																											PLCG2	600220
																											PMP2	170715
																											PRKACA	601639
																											RAB14	612673
																											RAC3	602050
																											RHBDF2	614404
																											RNF13	609247
																											RPA1	179835
																											RRAGC	608267
																											RRAS	165090
																											SAMD9L	611170
																											SFTPC	178620
																											SLC1A2	600300
																											SLC1A3	600111
																											SRC	190090
																											SYK	600085
																											TPM2	190990
																											TRPA1	604775
																											ZNF687	610568
																											ZSWIM6	615951
																											G6PC1	613742
																											AFG2B	619578
																											BBS2	606151
																											CFAP298	615494
																											CEP290	610142
																											BBS10	610148
																											FCSK	608675
																											MMUT	609058
																											SKIC3	614589
																											ADSS1	612498
																											KARS1	601421
																											MKS1	609883
																											OBSCN	608616
																											ODAD1	615038
																											BBS4	600374
																											VPS13B	607817
																											BBS9	607968
																											ALMS1	606844
																											CPLANE1	614571
																											KIAA0586	610178
																											BLTP1	611565
																											PCARE	613425
																											IFT172	607386
																											MADD	603584
																											CRPPA	614631
																											CCN6	603400
																											TUB	601197
																											BBS1	209901
																											TARS1	187790
																											UNC93B1	608204
																											PRMT7	610087
																											BBS5	603650
																											RAB23	606144
																											IL17RC	610925
																											AFG2A	613940
																											DYNC2I1	615462
																											BBS7	607590
																											VARS1	192150
																											BBS12	610683
																											CBLIF	609342
																											SKIC2	600478
																											CFAP410	603191
																											ODAD2	615408
																											HJV	608374
																											MKKS	604896
																											MTRFR	613541
																											QARS1	603727
																											DYNC2I2	613363
																											INPP5E	613037
																											TRAPPC9	611966
																											PROK2	607002
																											WDPCP	613580
																											DNAAF11	614930
																											PRORP	609947
																											RXYLT1	605862
																											IFT27	615870
																											ODAD3	615956
																											PDSS1	607429
																											ODAD4	617095
																											IFNAR1	107450
																											ADPRS	610624
																											KIFBP	609367
																											RARS1	107820
																											LARS1	151350
																											PCSK1	162150
																											MYORG	618255
																											TTC8	608132
																											ODAPH	614829
																											P4HTM	614584
																											HYCC1	610531
																											COA8	616003
																											EPRS1	138295
																											CFAP300	618058
																											GUCY1A1	139396
																											PGM2L1	611610
																											ARL6	608845
																											IFNAR2	602376
																											IL6R	147880
																											LEPR	601007
																											DYNLT2B	617353
																											CYBC1	618334
																											BPNT2	614010
																											CARS1	123859
																											MICOS13	616658
																											CFAP418	614477
																											LZTFL1	606568
																											DARS1	603084
																											IL6ST	600694
																											ATP5PO	600828
																											IRF7	605047
																											SARS1	607529
																											PJVK	610219
																											POMC	176830
																											CPE	114855
																											NOS2	163730
																											LYSET	619332
																											PTPRN2	601698
																											CDIN1	615626
																											LEP	164160
																											TENT5A	611357
																											ATP5F1D	603150
																											TLCD3B	615175
																											CEP19	615586
																											MRTFA	606078
																											ATP5F1E	606153
																											HFE	613609
																											BTD	609019
																											PAH	612349
																											ATP7B	606882
																											TFAM	600438
																											CYP21A2	613815
																											GNRHR	138850
																											DPYD	612779
																											SERPINA1	107400
																											ALDOB	612724
																											ACADSB	600301
																											C6	217050
																											DPYS	613326
																											UPB1	606673
																											SLC26A4	605646
																											C8B	120960
																											DHCR7	602858
																											GAA	606800
																											GCDH	608801
																											MPO	606989
																											ACADS	606885
																											AGXT	604285
																											DNAH11	603339
																											DCAF17	612515
																											PRKN	602544
																											MYO3A	606808
																											SLC12A3	600968
																											LAMA2	156225
																											SBDS	607444
																											RAB27A	603868
																											RNASEH2B	610326
																											CEP152	613529
																											NEB	161650
																											TPO	606765
																											EYS	612424
																											OCA2	611409
																											GYS2	138571
																											AGL	610860
																											ACY1	104620
																											ACADVL	609575
																											COL27A1	608461
																											MFF	614785
																											ABCC2	601107
																											ADA2	607575
																											CPS1	608307
																											CNGA3	600053
																											ABCG8	605460
																											DNAH9	603330
																											MYO15A	602666
																											GALC	606890
																											ASS1	603470
																											ABCG5	605459
																											HOGA1	613597
																											TRIOBP	609761
																											CYP2R1	608713
																											ACSF3	614245
																											IQCE	617631
																											ACADM	607008
																											SLC24A1	603617
																											MPZL2	604873
																											MMACHC	609831
																											DYNC2H1	603297
																											ERCC8	609412
																											XDH	607633
																											CYP4F22	611495
																											TGM1	190195
																											CNGB1	600724
																											TGM5	603805
																											ARSA	607574
																											DLD	238331
																											GALNS	612222
																											SGCA	600119
																											PCNT	605925
																											CYP2U1	610670
																											PYGM	608455
																											PPT1	600722
																											KLK4	603767
																											VSX2	142993
																											SLC26A2	606718
																											NMNAT1	608700
																											HEXB	606873
																											DYSF	603009
																											AP5Z1	613653
																											MTHFR	607093
																											SPG11	610844
																											PET100	614770
																											CENPJ	609279
																											PKD1L1	609721
																											ALOXE3	607206
																											CC2D2A	612013
																											NPC1	607623
																											FAH	613871
																											SLC25A13	603859
																											PCCB	232050
																											FARS2	611592
																											UNC13D	608897
																											OTOF	603681
																											ALDH5A1	610045
																											DNAI1	604366
																											TRPM1	603576
																											BCS1L	603647
																											PYROXD1	617220
																											RAD50	604040
																											GLB1	611458
																											MRE11	600814
																											OTOGL	614925
																											ALG6	604566
																											OTOG	604487
																											ADAMTSL4	610113
																											CD3E	186830
																											CCNO	607752
																											SPINK5	605010
																											GALT	606999
																											RECQL4	603780
																											TSPEAR	612920
																											MCPH1	607117
																											GPC6	604404
																											ASL	608310
																											PTS	612719
																											DRC1	615288
																											FANCA	607139
																											GLDC	238300
																											KIZ	615757
																											ORC6	607213
																											C9	120940
																											NBAS	608025
																											FMO3	136132
																											SMPD1	607608
																											GRM6	604096
																											DNAH5	603335
																											GNPTG	607838
																											IVD	607036
																											CCDC103	614677
																											FANCE	613976
																											LMF1	611761
																											C12orf57	615140
																											ATR	601215
																											CTNS	606272
																											IFT81	605489
																											AHI1	608894
																											SI	609845
																											WRN	604611
																											DZIP1L	617570
																											NTHL1	602656
																											FTCD	606806
																											LOXHD1	613072
																											NPHS1	602716
																											TONSL	604546
																											HMGCL	613898
																											PMM2	601785
																											ASAH1	613468
																											LIPN	613924
																											HEXA	606869
																											DDX11	601150
																											COG7	606978
																											CDHR1	609502
																											ASPA	608034
																											GNPTAB	607840
																											TG	188450
																											ERCC2	126340
																											HSD17B3	605573
																											GMPPB	615320
																											TRMT5	611023
																											TMPRSS3	605511
																											LAMA1	150320
																											MTRR	602568
																											SLC29A3	612373
																											JAK3	600173
																											FRAS1	607830
																											FKRP	606596
																											HADHA	600890
																											RTTN	610436
																											PTPRQ	603317
																											FANCM	609644
																											MCM8	608187
																											RARS2	611524
																											TRAPPC11	614138
																											NPHP1	607100
																											CTU2	617057
																											IGHMBP2	600502
																											ADGRG6	612243
																											PNKP	605610
																											ILDR1	609739
																											PPA2	609988
																											PEX5	600414
																											CD3G	186740
																											BLM	604610
																											UVSSA	614632
																											PINK1	608309
																											BRAT1	614506
																											CYP4V2	608614
																											ASPM	605481
																											MPDZ	603785
																											HGD	607474
																											EIF2B2	606454
																											CCDC40	613799
																											MANBA	609489
																											HMGCS2	600234
																											WWOX	605131
																											CLN3	607042
																											UROS	606938
																											BUB1B	602860
																											MCCC1	609010
																											MERTK	604705
																											VIPAS39	613401
																											CDH23	605516
																											AP4M1	602296
																											MAK	154235
																											CYP27A1	606530
																											EPG5	615068
[truncated: 1,974 more rows]

## Sheet: Actionable Genes
HFE
BTD
ATP7B
GAA
TTN
TTR
LDLR
RYR1
SCN5A
BRCA2
PCSK9
TRDN
BRCA1
RPE65
MYH7
KCNQ1
GLA
MYBPC3
CACNA1S
APOB
PALB2
KCNH2
HNF1A
MSH6
OTC
MLH1
LMNA
DSP
RYR2
PMS2
FBN1
PKP2
TSC1
TNNI3
RET
CASQ2
DES
MYL2
DSG2
TMEM43
SDHB
RBM20
TP53
VHL
FLNC
DSC2
TNNT2
APC
MSH2
TGFBR1
COL3A1
ACVRL1
MYL3
SDHC
RB1
SMAD3
MYH11
ACTA2
TPM1
MEN1
PRKAG2
MAX
TGFBR2
STK11
TSC2
ENG
PTEN
TMEM127
MUTYH
TNNC1
ACTC1
BAG3
SDHD
WT1
SDHAF2
BMPR1A
CALM1
NF2
SMAD4
CALM3
CALM2

## Sheet: Gene List
							GP																								CrF
							P								P+LP								P+LP+VUS-H								P								P+LP								P+LP+VUS-H
Gene Name	Disease Mechanism	Inheritance	ID	PanelApp	ICD-10	OMIM	mid	amr	asj	eas	fin	nfe	sas	afr	mid	amr	asj	eas	fin	nfe	sas	afr	mid	amr	asj	eas	fin	nfe	sas	afr	mid	amr	asj	eas	fin	nfe	sas	afr	mid	amr	asj	eas	fin	nfe	sas	afr	mid	amr	asj
SAMHD1	LOF	AD	SAMHD1-AD	Severe Paediatric Disorders	Severe Paediatric Disorders	?Chilblain lupus 2 (614415) (AD);Aicardi-Goutieres syndrome 5 (612952) (AR);?Chilblain lupus 2 (614415) (AD);Aicardi-Goutieres syndrome 5 (612952) (AR)	0	0.000134151	0.000306273	5.03842e-05	0	0.000588534	0.000255063	0.000537948	0.000346681	0.000402399	0.00084169	0.000252208	0.00142211	0.000824653	0.000510105	0.000837592	0.00138889	0.000402399	0.00084169	0.000858177	0.00142211	0.00121295	0.000533321	0.000897305	0	0.000134151	0.000306273	5.03842e-05	0	0.000588534	0.000255063	0.000537948	0.000346681	0.000402399	0.00084169	0.000252208	0.00142211	0.000824653	0.000510105	0.000837592	0.00138889	0.000402399	0.00084169
SAMHD1	LOF	AD	SAMHD1-AD	Rare genetic inflammatory skin disorders	Skin	?Chilblain lupus 2 (614415) (AD);Aicardi-Goutieres syndrome 5 (612952) (AR);?Chilblain lupus 2 (614415) (AD);Aicardi-Goutieres syndrome 5 (612952) (AR)	0	0.000134151	0.000306273	5.03842e-05	0	0.000588534	0.000255063	0.000537948	0.000346681	0.000402399	0.00084169	0.000252208	0.00142211	0.000824653	0.000510105	0.000837592	0.00138889	0.000402399	0.00084169	0.000858177	0.00142211	0.00121295	0.000533321	0.000897305	0	0.000134151	0.000306273	5.03842e-05	0	0.000588534	0.000255063	0.000537948	0.000346681	0.000402399	0.00084169	0.000252208	0.00142211	0.000824653	0.000510105	0.000837592	0.00138889	0.000402399	0.00084169
WARS1	LOF	AD	WARS1-AD	Hereditary neuropathy	Neurological	Neurodevelopmental disorder with microcephaly and speech delay, with or without brain abnormalities (620317) (AR);Neuronopathy, distal hereditary motor, autosomal dominant 9 (617721) (AD)	0	0	0.000306161	0	0.000224921	7.20475e-06	2.32572e-05	0	0	0.000182925	0.00038719	5.03867e-05	0.000449595	0.000136919	0.000448013	5.97532e-05	0	0.00067528	0.00038719	5.03867e-05	0.000449595	0.000147789	0.000448013	5.97532e-05	0	0	0.000306161	0	0.000224921	7.20475e-06	2.32572e-05	0	0	0.000182925	0.00038719	5.03867e-05	0.000449595	0.000136919	0.000448013	5.97532e-05	0	0.00067528	0.00038719
WARS1	LOF	AD	WARS1-AD	DDG2P	Congenital/Developmental	Neurodevelopmental disorder with microcephaly and speech delay, with or without brain abnormalities (620317) (AR);Neuronopathy, distal hereditary motor, autosomal dominant 9 (617721) (AD)	0	0	0.000306161	0	0.000224921	7.20475e-06	2.32572e-05	0	0	0.000182925	0.00038719	5.03867e-05	0.000449595	0.000136919	0.000448013	5.97532e-05	0	0.00067528	0.00038719	5.03867e-05	0.000449595	0.000147789	0.000448013	5.97532e-05	0	0	0.000306161	0	0.000224921	7.20475e-06	2.32572e-05	0	0	0.000182925	0.00038719	5.03867e-05	0.000449595	0.000136919	0.000448013	5.97532e-05	0	0.00067528	0.00038719
NARS1	Both	AD	NARS1-AD	DDG2P	Congenital/Developmental	Neurodevelopmental disorder with microcephaly, impaired language, and gait abnormalities, autosomal recessive (619091) (AR);Neurodevelopmental disorder with microcephaly, impaired language, epilepsy, and gait abnormalities, autosomal dominant (619092) (AD)	0	8.98776e-05	7.80488e-05	0	0.000112602	8.46647e-05	0.000325033	6.00907e-05	0.000346921	0.000403648	0.000155619	0.000100837	0.000449935	0.000644403	0.000835406	0.00048031	0.000346921	0.00089618	0.000232145	0.000453409	0.000562199	0.00121417	0.00153023	0.00113699	0	8.98776e-05	7.80488e-05	0	0.000112602	8.46647e-05	0.000325033	6.00907e-05	0.000346921	0.000403648	0.000155619	0.000100837	0.000449935	0.000644403	0.000835406	0.00048031	0.000346921	0.00089618	0.000232145
NARS1	Both	AD	NARS1-AD	Severe microcephaly	Neurological	Neurodevelopmental disorder with microcephaly, impaired language, and gait abnormalities, autosomal recessive (619091) (AR);Neurodevelopmental disorder with microcephaly, impaired language, epilepsy, and gait abnormalities, autosomal dominant (619092) (AD)	0	8.98776e-05	7.80488e-05	0	0.000112602	8.46647e-05	0.000325033	6.00907e-05	0.000346921	0.000403648	0.000155619	0.000100837	0.000449935	0.000644403	0.000835406	0.00048031	0.000346921	0.00089618	0.000232145	0.000453409	0.000562199	0.00121417	0.00153023	0.00113699	0	8.98776e-05	7.80488e-05	0	0.000112602	8.46647e-05	0.000325033	6.00907e-05	0.000346921	0.000403648	0.000155619	0.000100837	0.000449935	0.000644403	0.000835406	0.00048031	0.000346921	0.00089618	0.000232145
SPR	LOF	AD	SPR-AD	Severe Paediatric Disorders	Severe Paediatric Disorders	Dystonia, dopa-responsive, due to sepiapterin reductase deficiency (612716) (?AD, AR)	0.00103968	0.00104722	7.76307e-05	0.000201827	7.48755e-05	0.00057734	2.31865e-05	0.000239598	0.00139124	0.00135369	7.76307e-05	0.000269787	0.000614019	0.000749373	0.000609631	0.000419164	0.00187777	0.00155052	0.000309993	0.000734919	0.000917207	0.00103263	0.00130621	0.000863092	0.00103968	0.00104722	7.76307e-05	0.000201827	7.48755e-05	0.00057734	2.31865e-05	0.000239598	0.00139124	0.00135369	7.76307e-05	0.000269787	0.000614019	0.000749373	0.000609631	0.000419164	0.00187777	0.00155052	0.000309993
SPR	LOF	AD	SPR-AD	Brain channelopathy	Neurological	Dystonia, dopa-responsive, due to sepiapterin reductase deficiency (612716) (?AD, AR)	0.00103968	0.00104722	7.76307e-05	0.000201827	7.48755e-05	0.00057734	2.31865e-05	0.000239598	0.00139124	0.00135369	7.76307e-05	0.000269787	0.000614019	0.000749373	0.000609631	0.000419164	0.00187777	0.00155052	0.000309993	0.000734919	0.000917207	0.00103263	0.00130621	0.000863092	0.00103968	0.00104722	7.76307e-05	0.000201827	7.48755e-05	0.00057734	2.31865e-05	0.000239598	0.00139124	0.00135369	7.76307e-05	0.000269787	0.000614019	0.000749373	0.000609631	0.000419164	0.00187777	0.00155052	0.000309993
CILK1	LOF	AD	CILK1-AD	Severe Paediatric Disorders	Severe Paediatric Disorders	{Epilepsy, juvenile myoclonic, susceptibility to, 10} (617924) (AD);Endocrine-cerebroosteodysplasia (612651) (AR)	0	4.47217e-05	7.65316e-05	0	0	1.82728e-05	2.31865e-05	5.97425e-05	0.00173232	0.000447155	0.000229554	0.000655249	0.00056166	0.000435869	0.000162358	0.000657011	0.00173232	0.000447155	0.000229554	0.000655249	0.00056166	0.000435869	0.000162358	0.000716782	0	4.47217e-05	7.65316e-05	0	0	1.82728e-05	2.31865e-05	5.97425e-05	0.00173232	0.000447155	0.000229554	0.000655249	0.00056166	0.000435869	0.000162358	0.000657011	0.00173232	0.000447155	0.000229554
CLCNKB	LOF	AD	CLCNKB-AD	Nephrocalcinosis or nephrolithiasis	Kidney/Urinary System	Bartter syndrome, type 3 (607364) (AR);Bartter syndrome, type 4b, digenic (613090) (DR)	0	0.00339363	0	0.000554786	3.74511e-05	0.00121935	0.000538525	0.0011948	0.000719838	0.00406198	7.74024e-05	0.000856903	0.000150245	0.00151776	0.00225208	0.00191075	0.00214367	0.00455179	7.74024e-05	0.00106668	0.000187713	0.00203312	0.00338609	0.00250693	0	0.00339363	0	0.000554786	3.74511e-05	0.00121935	0.000538525	0.0011948	0.000719838	0.00406198	7.74024e-05	0.000856903	0.000150245	0.00151776	0.00225208	0.00191075	0.00214367	0.00455179	7.74024e-05
EMC1	LOF	AD	EMC1-AD	Severe Paediatric Disorders	Severe Paediatric Disorders	Cerebellar atrophy, visual impairment, and psychomotor retardation (616875) (AR)	0.000693241	0.000492439	0	0.00040301	3.74385e-05	0.000848682	0.000973561	0.000477854	0.0017322	0.00093934	0.000459043	0.00151048	0.000299565	0.0014454	0.00185551	0.00113838	0.0017322	0.00187711	0.000459043	0.00151048	0.000299565	0.00169323	0.00217948	0.00125772	0.000693241	0.000492439	0	0.00040301	3.74385e-05	0.000848682	0.000973561	0.000477854	0.0017322	0.00093934	0.000459043	0.00151048	0.000299565	0.0014454	0.00185551	0.00113838	0.0017322	0.00187711	0.000459043
EMC1	LOF	AD	EMC1-AD	Intellectual disability - microarray and sequencing	Neurological	Cerebellar atrophy, visual impairment, and psychomotor retardation (616875) (AR)	0.000693241	0.000492439	0	0.00040301	3.74385e-05	0.000848682	0.000973561	0.000477854	0.0017322	0.00093934	0.000459043	0.00151048	0.000299565	0.0014454	0.00185551	0.00113838	0.0017322	0.00187711	0.000459043	0.00151048	0.000299565	0.00169323	0.00217948	0.00125772	0.000693241	0.000492439	0	0.00040301	3.74385e-05	0.000848682	0.000973561	0.000477854	0.0017322	0.00093934	0.000459043	0.00151048	0.000299565	0.0014454	0.00185551	0.00113838	0.0017322	0.00187711	0.000459043
MARS1	LOF	AD	MARS1-AD	Adult onset leukodystrophy	Neurological	?Trichothiodystrophy 9, nonphotosensitive (619692) (AR);Charcot-Marie-Tooth disease, axonal, type 2U (616280) (AD);Interstitial lung and liver disease (615486) (AR);Spastic paraplegia 70, autosomal recessive (620323) (AR)	0.000705172	0.000626125	0	0.000503654	0.000112315	0.000314717	0.000324566	0.000836042	0.00933012	0.00348508	0.00450825	0.00226653	0.000716449	0.00275907	0.00227116	0.00203085	0.00933012	0.00348508	0.00450825	0.00246757	0.000716449	0.00280751	0.00240996	0.00203085	0.000705172	0.000626125	0	0.000503654	0.000112315	0.000314717	0.000324566	0.000836042	0.00933012	0.00348508	0.00450825	0.00226653	0.000716449	0.00275907	0.00227116	0.00203085	0.00933012	0.00348508	0.00450825
YARS1	LOF	AD	YARS1-AD	Hereditary neuropathy	Neurological	Charcot-Marie-Tooth disease, dominant intermediate C (608323) (AD);Infantile-onset multisystem neurologic, endocrine, and pancreatic disease 2 (619418) (AR)	0	0.000178889	0	0	0.000224653	5.9354e-05	0.000115927	0	0.000693481	0.000759977	0	0.000251931	0.000224653	0.000602371	0.000440485	0.000298648	0.00139957	0.0011174	0.000229542	0.000302303	0.000224653	0.000737179	0.000625881	0.000298648	0	0.000178889	0	0	0.000224653	5.9354e-05	0.000115927	0	0.000693481	0.000759977	0	0.000251931	0.000224653	0.000602371	0.000440485	0.000298648	0.00139957	0.0011174	0.000229542
ARL3	LOF	AD	ARL3-AD	Retinal disorders	Eye	Joubert syndrome 35 (618161) (AR);Retinitis pigmentosa 83 (618173) (AD)	0	0	0	0	0	4.55396e-05	0	0	0.000800379	0.000223609	0	5.03766e-05	0	0.000132213	0.000302938	0	0.00120964	0.000992493	7.71933e-05	0.000302524	7.5254e-05	0.000271188	0.000467274	0.000239807	0	0	0	0	0	4.55396e-05	0	0	0.000800379	0.000223609	0	5.03766e-05	0	0.000132213	0.000302938	0	0.00120964	0.000992493	7.71933e-05
PALS1	LOF	AD	PALS1-AD	Intellectual disability - microarray and sequencing	Neurological	-	0	8.94775e-05	0	0	0	1.79942e-05	2.32837e-05	0	0.000346801	8.94775e-05	8.11655e-05	0.000153379	0.000112505	0.000157162	0.000139515	0.000119496	0.000346801	0.000180778	8.11655e-05	0.000153379	0.000112505	0.000219048	0.00018592	0.000179565	0	8.94775e-05	0	0	0	1.79942e-05	2.32837e-05	0	0.000346801	8.94775e-05	8.11655e-05	0.000153379	0.000112505	0.000157162	0.000139515	0.000119496	0.000346801	0.000180778	8.11655e-05
HARS1	LOF	AD	HARS1-AD	Hereditary neuropathy	Neurological	Charcot-Marie-Tooth disease, axonal, type 2W (616625) (AD);Usher syndrome type 3B (614504) (AR)	0	4.47557e-05	0	0	0	3.61736e-06	2.35297e-05	0	0.00138672	0.000223703	0	5.07395e-05	0.000196688	0.000193491	0.000140548	0.000298902	0.00138672	0.000357878	7.65316e-05	5.07395e-05	0.000234124	0.000810176	0.000140548	0.000298902	0	4.47557e-05	0	0	0	3.61736e-06	2.35297e-05	0	0.00138672	0.000223703	0	5.07395e-05	0.000196688	0.000193491	0.000140548	0.000298902	0.00138672	0.000357878	7.65316e-05
RIGI	LOF	AD	RIGI-AD	Glaucoma developmental	Eye	Singleton-Merten syndrome 2 (616298) (AD)	0	0	0	0	0	3.60396e-06	7.2e-05	0	0.00624981	0.00136692	0.000469712	0.00151648	0.00223369	0.00138718	0.0126594	0.00170528	0.00624981	0.00136692	0.000469712	0.00151648	0.00223369	0.00145575	0.0126594	0.00170528	0	0	0	0	0	3.60396e-06	7.2e-05	0	0.00624981	0.00136692	0.000469712	0.00151648	0.00223369	0.00138718	0.0126594	0.00170528	0.00624981	0.00136692	0.000469712
SEPTIN9	LOF	AD	SEPTIN9-AD	Severe Paediatric Disorders	Severe Paediatric Disorders	Amyotrophy, hereditary neuralgic (162100) (AD)	0	0	0	0	0	3.64848e-06	0	0	0	0	7.66783e-05	5.08712e-05	0	3.0836e-05	2.52675e-05	0.000239063	0	4.47177e-05	7.66783e-05	5.08712e-05	3.74735e-05	3.26352e-05	7.16389e-05	0.000239063	0	0	0	0	0	3.64848e-06	0	0	0	0	7.66783e-05	5.08712e-05	0	3.0836e-05	2.52675e-05	0.000239063	0	4.47177e-05	7.66783e-05
SEPTIN9	LOF	AD	SEPTIN9-AD	Pain syndromes	Neurological	Amyotrophy, hereditary neuralgic (162100) (AD)	0	0	0	0	0	3.64848e-06	0	0	0	0	7.66783e-05	5.08712e-05	0	3.0836e-05	2.52675e-05	0.000239063	0	4.47177e-05	7.66783e-05	5.08712e-05	3.74735e-05	3.26352e-05	7.16389e-05	0.000239063	0	0	0	0	0	3.64848e-06	0	0	0	0	7.66783e-05	5.08712e-05	0	3.0836e-05	2.52675e-05	0.000239063	0	4.47177e-05	7.66783e-05
MYL11	LOF	AD	MYL11-AD	DDG2P	Congenital/Developmental	Arthrogryposis, distal, type 1C (619110) (AD, AR)	0	0	0	5.03791e-05	0	1.79893e-06	0	0	0	0	0	0.000201511	3.75256e-05	0.000106524	0.000370977	0	0	0.000134177	0	0.000201511	0.000224816	0.000329685	0.000486873	0.000179195	0	0	0	5.03791e-05	0	1.79893e-06	0	0	0	0	0	0.000201511	3.75256e-05	0.000106524	0.000370977	0	0	0.000134177	0
H3-3A	LOF	AD	H3-3A-AD	Malformations of cortical development	Neurological	Bryant-Li-Bhoj neurodevelopmental syndrome 1 (619720) (AD)	0	0	0	0	0	0	2.61969e-05	0	0	0	0	0	0	0	2.61969e-05	0	0	0	0	0	0	1.81009e-06	2.61969e-05	0	0	0	0	0	0	0	2.61969e-05	0	0	0	0	0	0	0	2.61969e-05	0	0	0	0
H3-3A	LOF	AD	H3-3A-AD	DDG2P	Congenital/Developmental	Bryant-Li-Bhoj neurodevelopmental syndrome 1 (619720) (AD)	0	0	0	0	0	0	2.61969e-05	0	0	0	0	0	0	0	2.61969e-05	0	0	0	0	0	0	1.81009e-06	2.61969e-05	0	0	0	0	0	0	0	2.61969e-05	0	0	0	0	0	0	0	2.61969e-05	0	0	0	0
MTSS2	LOF	AD	MTSS2-AD	DDG2P	Congenital/Developmental	Intellectual developmental disorder with ocular anomalies and distinctive facial features (620086) (AD)	0	0	0	0	0	0	2.367e-05	0	0	0.000320632	0.000340626	0.000641547	0.000617457	0.000234333	0.000245139	0.000435332	0	0.000365393	0.000340626	0.00180108	0.00073442	0.000303212	0.000269254	0.000554819	0	0	0	0	0	0	2.367e-05	0	0	0.000320632	0.000340626	0.000641547	0.000617457	0.000234333	0.000245139	0.000435332	0	0.000365393	0.000340626
MTSS2	LOF	AD	MTSS2-AD	Intellectual disability - microarray and sequencing	Neurological	Intellectual developmental disorder with ocular anomalies and distinctive facial features (620086) (AD)	0	0	0	0	0	0	2.367e-05	0	0	0.000320632	0.000340626	0.000641547	0.000617457	0.000234333	0.000245139	0.000435332	0	0.000365393	0.000340626	0.00180108	0.00073442	0.000303212	0.000269254	0.000554819	0	0	0	0	0	0	2.367e-05	0	0	0.000320632	0.000340626	0.000641547	0.000617457	0.000234333	0.000245139	0.000435332	0	0.000365393	0.000340626
EGR2	LOF	AD	EGR2-AD	Severe Paediatric Disorders	Severe Paediatric Disorders	Charcot-Marie-Tooth disease, type 1D (607678) (AD);Dejerine-Sottas disease (145900) (AD, AR);Hypomyelinating neuropathy, congenital, 1 (605253) (AD, AR);Charcot-Marie-Tooth disease, type 1D (607678) (AD);Dejerine-Sottas disease (145900) (AD, AR);Hypomyelinating neuropathy, congenital, 1 (605253) (AD, AR);Charcot-Marie-Tooth disease, type 1D (607678) (AD);Dejerine-Sottas disease (145900) (AD, AR);…	0	0	0	0	0	1.79854e-06	0	0	0	0	0	0	0	1.6187e-05	0	0	0	0	0	0	0	1.79856e-05	0.000139143	5.97354e-05	0	0	0	0	0	1.79854e-06	0	0	0	0	0	0	0	1.6187e-05	0	0	0	0	0
EGR2	LOF	AD	EGR2-AD	Hereditary neuropathy	Neurological	Charcot-Marie-Tooth disease, type 1D (607678) (AD);Dejerine-Sottas disease (145900) (AD, AR);Hypomyelinating neuropathy, congenital, 1 (605253) (AD, AR);Charcot-Marie-Tooth disease, type 1D (607678) (AD);Dejerine-Sottas disease (145900) (AD, AR);Hypomyelinating neuropathy, congenital, 1 (605253) (AD, AR);Charcot-Marie-Tooth disease, type 1D (607678) (AD);Dejerine-Sottas disease (145900) (AD, AR);…	0	0	0	0	0	1.79854e-06	0	0	0	0	0	0	0	1.6187e-05	0	0	0	0	0	0	0	1.79856e-05	0.000139143	5.97354e-05	0	0	0	0	0	1.79854e-06	0	0	0	0	0	0	0	1.6187e-05	0	0	0	0	0
VAMP1	LOF	AD	VAMP1-AD	Severe Paediatric Disorders	Severe Paediatric Disorders	Myasthenic syndrome, congenital, 25 (618323) (AR);Spastic ataxia 1, autosomal dominant (108600) (AD)	0	0	0	0	0	1.79873e-06	0	0	0	0	0	0	0	3.59744e-06	0	0	0	0	0	0	0	3.59744e-06	0	0	0	0	0	0	0	1.79873e-06	0	0	0	0	0	0	0	3.59744e-06	0	0	0	0	0
VAMP1	LOF	AD	VAMP1-AD	Childhood onset dystonia, chorea or related movement disorder	Neurological	Myasthenic syndrome, congenital, 25 (618323) (AR);Spastic ataxia 1, autosomal dominant (108600) (AD)	0	0	0	0	0	1.79873e-06	0	0	0	0	0	0	0	3.59744e-06	0	0	0	0	0	0	0	3.59744e-06	0	0	0	0	0	0	0	1.79873e-06	0	0	0	0	0	0	0	3.59744e-06	0	0	0	0	0
TBXT	LOF	AD	TBXT-AD	Sarcoma cancer susceptibility	Neoplasm	{Neural tube defects, susceptibility to} (182940) (AD);Sacral agenesis with vertebral anomalies (615709) (AR);{Neural tube defects, susceptibility to} (182940) (AD);Sacral agenesis with vertebral anomalies (615709) (AR);{Neural tube defects, susceptibility to} (182940) (AD);Sacral agenesis with vertebral anomalies (615709) (AR)	0	0	0	0	0	3.60335e-06	0	0	0	0.000223569	7.65609e-05	0.000458683	0.000155573	0.000147554	0.000139113	0.00023892	0	0.00031299	7.65609e-05	0.000458683	0.000193709	0.000181722	0.00020866	0.000298641	0	0	0	0	0	3.60335e-06	0	0	0	0.000223569	7.65609e-05	0.000458683	0.000155573	0.000147554	0.000139113	0.00023892	0	0.00031299	7.65609e-05
LORICRIN	LOF	AD	LORICRIN-AD	Ichthyosis and erythrokeratoderma	Skin	Vohwinkel syndrome with ichthyosis (604117) (AD)	0	0	0	0	0	7.49624e-06	0	0	0	0	0.000392641	0.000161088	0.000272104	0.000105554	0.000163917	0.000147856	0	0	0.000392641	0.000161088	0.000272104	0.000133521	0.000163917	0.000147856	0	0	0	0	0	7.49624e-06	0	0	0	0	0.000392641	0.000161088	0.000272104	0.000105554	0.000163917	0.000147856	0	0	0.000392641
H4C3	LOF	AD	H4C3-AD	Severe microcephaly	Neurological	Tessadori-Bicknell-van Haaften neurodevelopmental syndrome 1 (619758) (AD)	0	0	0	0	0	0	0	0	0.00279622	0.00237303	0.00023007	0.000253481	0.000375336	0.000442539	0.000489814	0.000956754	0.00453198	0.00335457	0.00443089	0.000455813	0.000450185	0.00153848	0.000791103	0.00119545	0	0	0	0	0	0	0	0	0.00279622	0.00237303	0.00023007	0.000253481	0.000375336	0.000442539	0.000489814	0.000956754	0.00453198	0.00335457	0.00443089
H4C3	LOF	AD	H4C3-AD	DDG2P	Congenital/Developmental	Tessadori-Bicknell-van Haaften neurodevelopmental syndrome 1 (619758) (AD)	0	0	0	0	0	0	0	0	0.00279622	0.00237303	0.00023007	0.000253481	0.000375336	0.000442539	0.000489814	0.000956754	0.00453198	0.00335457	0.00443089	0.000455813	0.000450185	0.00153848	0.000791103	0.00119545	0	0	0	0	0	0	0	0	0.00279622	0.00237303	0.00023007	0.000253481	0.000375336	0.000442539	0.000489814	0.000956754	0.00453198	0.00335457	0.00443089
H4C5	LOF	AD	H4C5-AD	Intellectual disability - microarray and sequencing	Neurological	Tessadori-Bicknell-van Haaften neurodevelopmental syndrome 3 (619950) (AD)	0	0	0	0	0	0	0	0	0	0.00147933	0.0180426	0.000957748	7.49725e-05	0.00132082	0.00037117	0.00102225	0	0.00147933	0.0180426	0.000957748	7.49725e-05	0.00132621	0.00037117	0.00102225	0	0	0	0	0	0	0	0	0	0.00147933	0.0180426	0.000957748	7.49725e-05	0.00132082	0.00037117	0.00102225	0	0.00147933	0.0180426
CFAP276	LOF	AD	CFAP276-AD	Hereditary neuropathy	Neurological	-	0	0	0	0	0	0	0	0	0.0021654	0.000428884	0.00187881	0.000363939	0.00346699	0.00369986	0.00189579	0.000734566	0.00251583	0.00342073	0.0019554	0.000363939	0.00350453	0.00439884	0.00196531	0.000854099	0	0	0	0	0	0	0	0	0.0021654	0.000428884	0.00187881	0.000363939	0.00346699	0.00369986	0.00189579	0.000734566	0.00251583	0.00342073	0.0019554
H3-3B	LOF	AD	H3-3B-AD	Early onset or syndromic epilepsy	Neurological	Bryant-Li-Bhoj neurodevelopmental syndrome 2 (619721) (AD)	0	0	0	0	0	0	0	0	0	0	7.87619e-05	0	7.55715e-05	1.08122e-05	0	0	0.000410425	4.47297e-05	7.87619e-05	5.67521e-05	7.55715e-05	6.20177e-05	0.00012699	6.99962e-05	0	0	0	0	0	0	0	0	0	0	7.87619e-05	0	7.55715e-05	1.08122e-05	0	0	0.000410425	4.47297e-05	7.87619e-05
H3-3B	LOF	AD	H3-3B-AD	DDG2P	Congenital/Developmental	Bryant-Li-Bhoj neurodevelopmental syndrome 2 (619721) (AD)	0	0	0	0	0	0	0	0	0	0	7.87619e-05	0	7.55715e-05	1.08122e-05	0	0	0.000410425	4.47297e-05	7.87619e-05	5.67521e-05	7.55715e-05	6.20177e-05	0.00012699	6.99962e-05	0	0	0	0	0	0	0	0	0	0	7.87619e-05	0	7.55715e-05	1.08122e-05	0	0	0.000410425	4.47297e-05	7.87619e-05
ATP5MC3	LOF	AD	ATP5MC3-AD	Childhood onset dystonia, chorea or related movement disorder	Neurological	Dystonia, early-onset, and/or spastic paraplegia (619681) (AD)	0	0	0	0	0	0	0	0	0	4.52847e-05	0	0	0.000112805	7.93348e-05	4.88371e-05	6.00114e-05	0	4.52847e-05	0	0	0.000112805	8.29387e-05	0.000119756	6.00114e-05	0	0	0	0	0	0	0	0	0	4.52847e-05	0	0	0.000112805	7.93348e-05	4.88371e-05	6.00114e-05	0	4.52847e-05	0
ATP5MC3	LOF	AD	ATP5MC3-AD	Mitochondrial disorder with complex V deficiency	Mitochrondrial	Dystonia, early-onset, and/or spastic paraplegia (619681) (AD)	0	0	0	0	0	0	0	0	0	4.52847e-05	0	0	0.000112805	7.93348e-05	4.88371e-05	6.00114e-05	0	4.52847e-05	0	0	0.000112805	8.29387e-05	0.000119756	6.00114e-05	0	0	0	0	0	0	0	0	0	4.52847e-05	0	0	0.000112805	7.93348e-05	4.88371e-05	6.00114e-05	0	4.52847e-05	0
ATP5MC3	LOF	AD	ATP5MC3-AD	Likely inborn error of metabolism - targeted testing not possible	Metabolic	Dystonia, early-onset, and/or spastic paraplegia (619681) (AD)	0	0	0	0	0	0	0	0	0	4.52847e-05	0	0	0.000112805	7.93348e-05	4.88371e-05	6.00114e-05	0	4.52847e-05	0	0	0.000112805	8.29387e-05	0.000119756	6.00114e-05	0	0	0	0	0	0	0	0	0	4.52847e-05	0	0	0.000112805	7.93348e-05	4.88371e-05	6.00114e-05	0	4.52847e-05	0
ATP5F1AP1	LOF	AD	ATP5F1AP1-AD	Mitochondrial disorder with complex V deficiency	Mitochrondrial	?Mitochondrial complex V (ATP synthase) deficiency, nuclear type 4B, encephalopathic type (615228) (AR)	0	0	0	0	0	0	0	0	0	0	0	0	0	0	0	0	0	0	0	0	0	0	0	0	0	0	0	0	0	0	0	0	0	0	0	0	0	0	0	0	0	0	0
ATP5F1AP1	LOF	AD	ATP5F1AP1-AD	Undiagnosed metabolic disorders	Metabolic	?Mitochondrial complex V (ATP synthase) deficiency, nuclear type 4B, encephalopathic type (615228) (AR)	0	0	0	0	0	0	0	0	0	0	0	0	0	0	0	0	0	0	0	0	0	0	0	0	0	0	0	0	0	0	0	0	0	0	0	0	0	0	0	0	0	0	0
ATP5F1AP1	LOF	AD	ATP5F1AP1-AD	DDG2P	Congenital/Developmental	?Mitochondrial complex V (ATP synthase) deficiency, nuclear type 4B, encephalopathic type (615228) (AR)	0	0	0	0	0	0	0	0	0	0	0	0	0	0	0	0	0	0	0	0	0	0	0	0	0	0	0	0	0	0	0	0	0	0	0	0	0	0	0	0	0	0	0
CERT1	LOF	AD	CERT1-AD	Fetal anomalies	Congenital/Developmental	Intellectual developmental disorder, autosomal dominant 34 (616351) (AD)	0	0	0	0	0	0	0	0	0	0.000135274	0.000461396	0.000153323	7.49274e-05	8.7344e-05	0.000148447	0	0	0.000135274	0.000461396	0.000153323	7.49274e-05	9.4539e-05	0.000148447	0	0	0	0	0	0	0	0	0	0	0.000135274	0.000461396	0.000153323	7.49274e-05	8.7344e-05	0.000148447	0	0	0.000135274	0.000461396
CERT1	LOF	AD	CERT1-AD	Severe Paediatric Disorders	Severe Paediatric Disorders	Intellectual developmental disorder, autosomal dominant 34 (616351) (AD)	0	0	0	0	0	0	0	0	0	0.000135274	0.000461396	0.000153323	7.49274e-05	8.7344e-05	0.000148447	0	0	0.000135274	0.000461396	0.000153323	7.49274e-05	9.4539e-05	0.000148447	0	0	0	0	0	0	0	0	0	0	0.000135274	0.000461396	0.000153323	7.49274e-05	8.7344e-05	0.000148447	0	0	0.000135274	0.000461396
CERT1	LOF	AD	CERT1-AD	Intellectual disability - microarray and sequencing	Neurological	Intellectual developmental disorder, autosomal dominant 34 (616351) (AD)	0	0	0	0	0	0	0	0	0	0.000135274	0.000461396	0.000153323	7.49274e-05	8.7344e-05	0.000148447	0	0	0.000135274	0.000461396	0.000153323	7.49274e-05	9.4539e-05	0.000148447	0	0	0	0	0	0	0	0	0	0	0.000135274	0.000461396	0.000153323	7.49274e-05	8.7344e-05	0.000148447	0	0	0.000135274	0.000461396
H1-4	LOF	AD	H1-4-AD	Severe Paediatric Disorders	Severe Paediatric Disorders	Rahman syndrome (617537) (AD)	0	0	0	0	0	0	0	0	0	4.56548e-05	0	5.03816e-05	0.000272673	9.3675e-05	2.3186e-05	0	0	4.56548e-05	0	5.03816e-05	0.000272673	9.3675e-05	2.3186e-05	0	0	0	0	0	0	0	0	0	0	4.56548e-05	0	5.03816e-05	0.000272673	9.3675e-05	2.3186e-05	0	0	4.56548e-05	0
H1-4	LOF	AD	H1-4-AD	Intellectual disability - microarray and sequencing	Neurological	Rahman syndrome (617537) (AD)	0	0	0	0	0	0	0	0	0	4.56548e-05	0	5.03816e-05	0.000272673	9.3675e-05	2.3186e-05	0	0	4.56548e-05	0	5.03816e-05	0.000272673	9.3675e-05	2.3186e-05	0	0	0	0	0	0	0	0	0	0	4.56548e-05	0	5.03816e-05	0.000272673	9.3675e-05	2.3186e-05	0	0	4.56548e-05	0
H1-4	LOF	AD	H1-4-AD	Beckwith-Wiedemann syndrome BWS and other congenital overgrowth disorders	Congenital/Developmental	Rahman syndrome (617537) (AD)	0	0	0	0	0	0	0	0	0	4.56548e-05	0	5.03816e-05	0.000272673	9.3675e-05	2.3186e-05	0	0	4.56548e-05	0	5.03816e-05	0.000272673	9.3675e-05	2.3186e-05	0	0	0	0	0	0	0	0	0	0	4.56548e-05	0	5.03816e-05	0.000272673	9.3675e-05	2.3186e-05	0	0	4.56548e-05	0
H4C11	LOF	AD	H4C11-AD	DDG2P	Congenital/Developmental	?Tessadori-Bicknell-van Haaften neurodevelopmental syndrome 2 (619759) (AD)	0	0	0	0	0	0	0	0	0	4.74462e-05	0	0	0	1.45943e-05	0	0	0	0.000273256	0	0	0	6.03445e-05	2.48087e-05	0	0	0	0	0	0	0	0	0	0	4.74462e-05	0	0	0	1.45943e-05	0	0	0	0.000273256	0
ABCA4	LOF	AD	ABCA4-AD	Severe Paediatric Disorders	Severe Paediatric Disorders	{Macular degeneration, age-related, 2} (153800) (AD);Cone-rod dystrophy 3 (604116) (AR);Fundus flavimaculatus (248200) (AR);Retinal dystrophy, early-onset severe (248200) (AR);Retinitis pigmentosa 19 (601718) (AR);Stargardt disease 1 (248200) (AR)	0.0601331	0.0369448	0.0611448	0.0176633	0.0286125	0.0556766	0.0449163	0.0872965	0.0791736	0.0479841	0.0853328	0.0246163	0.0468374	0.0790611	0.0571083	0.098885	0.0869468	0.0608167	0.101498	0.0359103	0.0496263	0.0841543	0.0760686	0.11638	0.0601331	0.0369448	0.0611448	0.0176633	0.0286125	0.0556766	0.0449163	0.0872965	0.0791736	0.0479841	0.0853328	0.0246163	0.0468374	0.0790611	0.0571083	0.098885	0.0869468	0.0608167	0.101498
MEFV	LOF	AD	MEFV-AD	Severe Paediatric Disorders	Severe Paediatric Disorders	Familial Mediterranean fever, AD (134610) (AD);Familial Mediterranean fever, AR (249100) (AR);Neutrophilic dermatosis, acute febrile (608068) (AD)	0.0437292	0.00196569	0.0745837	0.00100705	4.14053e-05	0.001533	0.000556355	0.000298641	0.0460477	0.00303721	0.0747249	0.00326921	8.31494e-05	0.00218013	0.00153428	0.00125384	0.0460477	0.0032185	0.0747249	0.00326921	8.31494e-05	0.00227703	0.00153428	0.0013135	0.0437292	0.00196569	0.0745837	0.00100705	4.14053e-05	0.001533	0.000556355	0.000298641	0.0460477	0.00303721	0.0747249	0.00326921	8.31494e-05	0.00218013	0.00153428	0.00125384	0.0460477	0.0032185	0.0747249
MEFV	LOF	AD	MEFV-AD	Periodic fever syndromes	Rheumatic	Familial Mediterranean fever, AD (134610) (AD);Familial Mediterranean fever, AR (249100) (AR);Neutrophilic dermatosis, acute febrile (608068) (AD)	0.0437292	0.00196569	0.0745837	0.00100705	4.14053e-05	0.001533	0.000556355	0.000298641	0.0460477	0.00303721	0.0747249	0.00326921	8.31494e-05	0.00218013	0.00153428	0.00125384	0.0460477	0.0032185	0.0747249	0.00326921	8.31494e-05	0.00227703	0.00153428	0.0013135	0.0437292	0.00196569	0.0745837	0.00100705	4.14053e-05	0.001533	0.000556355	0.000298641	0.0460477	0.00303721	0.0747249	0.00326921	8.31494e-05	0.00218013	0.00153428	0.00125384	0.0460477	0.0032185	0.0747249
MEFV	LOF	AD	MEFV-AD	COVID-19 research	Immune System/Infectious	Familial Mediterranean fever, AD (134610) (AD);Familial Mediterranean fever, AR (249100) (AR);Neutrophilic dermatosis, acute febrile (608068) (AD)	0.0437292	0.00196569	0.0745837	0.00100705	4.14053e-05	0.001533	0.000556355	0.000298641	0.0460477	0.00303721	0.0747249	0.00326921	8.31494e-05	0.00218013	0.00153428	0.00125384	0.0460477	0.0032185	0.0747249	0.00326921	8.31494e-05	0.00227703	0.00153428	0.0013135	0.0437292	0.00196569	0.0745837	0.00100705	4.14053e-05	0.001533	0.000556355	0.000298641	0.0460477	0.00303721	0.0747249	0.00326921	8.31494e-05	0.00218013	0.00153428	0.00125384	0.0460477	0.0032185	0.0747249
MEFV	LOF	AD	MEFV-AD	Gastrointestinal epithelial barrier disorders	Gastrointestinal	Familial Mediterranean fever, AD (134610) (AD);Familial Mediterranean fever, AR (249100) (AR);Neutrophilic dermatosis, acute febrile (608068) (AD)	0.0437292	0.00196569	0.0745837	0.00100705	4.14053e-05	0.001533	0.000556355	0.000298641	0.0460477	0.00303721	0.0747249	0.00326921	8.31494e-05	0.00218013	0.00153428	0.00125384	0.0460477	0.0032185	0.0747249	0.00326921	8.31494e-05	0.00227703	0.00153428	0.0013135	0.0437292	0.00196569	0.0745837	0.00100705	4.14053e-05	0.001533	0.000556355	0.000298641	0.0460477	0.00303721	0.0747249	0.00326921	8.31494e-05	0.00218013	0.00153428	0.00125384	0.0460477	0.0032185	0.0747249
CFTR	LOF	AD	CFTR-AD	Additional findings reproductive carrier status	Congenital/Developmental	{Bronchiectasis with or without elevated sweat chloride 1, modifier of} (211400) (AD);{Hypertrypsinemia, neonatal};{Pancreatitis, hereditary} (167800) (AD);Congenital bilateral absence of vas deferens (277180) (AR);Cystic fibrosis (219700) (AR);Sweat chloride elevation without CF;{Bronchiectasis with or without elevated sweat chloride 1, modifier of} (211400) (AD);{Hypertrypsinemia, neonatal};{Pa…	0.0319344	0.040965	0.0425015	0.035412	0.0157963	0.0543756	0.0197618	0.0673187	0.0426592	0.0539858	0.0601255	0.0769468	0.0163871	0.0640723	0.042085	0.0724682	0.10623	0.097681	0.148897	0.135422	0.0949492	0.111277	0.0861318	0.0900815	0.0319344	0.040965	0.0425015	0.035412	0.0157963	0.0543756	0.0197618	0.0673187	0.0426592	0.0539858	0.0601255	0.0769468	0.0163871	0.0640723	0.042085	0.0724682	0.10623	0.097681	0.148897
CFTR	LOF	AD	CFTR-AD	Severe Paediatric Disorders	Severe Paediatric Disorders	{Bronchiectasis with or without elevated sweat chloride 1, modifier of} (211400) (AD);{Hypertrypsinemia, neonatal};{Pancreatitis, hereditary} (167800) (AD);Congenital bilateral absence of vas deferens (277180) (AR);Cystic fibrosis (219700) (AR);Sweat chloride elevation without CF;{Bronchiectasis with or without elevated sweat chloride 1, modifier of} (211400) (AD);{Hypertrypsinemia, neonatal};{Pa…	0.0319344	0.040965	0.0425015	0.035412	0.0157963	0.0543756	0.0197618	0.0673187	0.0426592	0.0539858	0.0601255	0.0769468	0.0163871	0.0640723	0.042085	0.0724682	0.10623	0.097681	0.148897	0.135422	0.0949492	0.111277	0.0861318	0.0900815	0.0319344	0.040965	0.0425015	0.035412	0.0157963	0.0543756	0.0197618	0.0673187	0.0426592	0.0539858	0.0601255	0.0769468	0.0163871	0.0640723	0.042085	0.0724682	0.10623	0.097681	0.148897
HBB	LOF	AD	HBB-AD	Hereditary Erythrocytosis	Hematologic	{Malaria, resistance to} (611162);Delta-beta thalassemia (141749) (AD);Erythrocytosis, familial, 6 (617980) (AD);Heinz body anemia (140700) (AD);Hereditary persistence of fetal hemoglobin (141749) (AD);Methemoglobinemia, beta type (617971) (AD);Sickle cell disease (603903) (AR);Thalassemia-beta, dominant inclusion-body (603902) (AD);Thalassemia, beta (613985);{Malaria, resistance to} (611162);Del…	0.030089	0.00659729	0.000229665	0.00412286	0.00671659	0.00146129	0.0322543	0.137122	0.0324992	0.00744374	0.036425	0.00467477	0.00675377	0.00181397	0.0369834	0.138934	0.0331697	0.00748813	0.036425	0.00512604	0.00679096	0.00197477	0.0391406	0.138985	0.030089	0.00659729	0.000229665	0.00412286	0.00671659	0.00146129	0.0322543	0.137122	0.0324992	0.00744374	0.036425	0.00467477	0.00675377	0.00181397	0.0369834	0.138934	0.0331697	0.00748813	0.036425
HBB	LOF	AD	HBB-AD	Severe Paediatric Disorders	Severe Paediatric Disorders	{Malaria, resistance to} (611162);Delta-beta thalassemia (141749) (AD);Erythrocytosis, familial, 6 (617980) (AD);Heinz body anemia (140700) (AD);Hereditary persistence of fetal hemoglobin (141749) (AD);Methemoglobinemia, beta type (617971) (AD);Sickle cell disease (603903) (AR);Thalassemia-beta, dominant inclusion-body (603902) (AD);Thalassemia, beta (613985);{Malaria, resistance to} (611162);Del…	0.030089	0.00659729	0.000229665	0.00412286	0.00671659	0.00146129	0.0322543	0.137122	0.0324992	0.00744374	0.036425	0.00467477	0.00675377	0.00181397	0.0369834	0.138934	0.0331697	0.00748813	0.036425	0.00512604	0.00679096	0.00197477	0.0391406	0.138985	0.030089	0.00659729	0.000229665	0.00412286	0.00671659	0.00146129	0.0322543	0.137122	0.0324992	0.00744374	0.036425	0.00467477	0.00675377	0.00181397	0.0369834	0.138934	0.0331697	0.00748813	0.036425
TYR	LOF	AD	TYR-AD	Albinism or congenital nystagmus	Skin	[Skin/hair/eye pigmentation 3, blue/green eyes] (601800) (AD);[Skin/hair/eye pigmentation 3, light/dark/freckling skin] (601800) (AD);{Melanoma, cutaneous malignant, susceptibility to, 8} (601800) (AD);Albinism, oculocutaneous, type IA (203100) (AR);Albinism, oculocutaneous, type IB (606952) (AR)	0.0206466	0.0104766	0.0487613	0.0065808	0.0236617	0.0181439	0.0107278	0.00430041	0.0284443	0.0114502	0.049416	0.00763153	0.0239906	0.0200829	0.0127215	0.00549091	0.0308049	0.0149391	0.0501422	0.00933034	0.0247576	0.0209198	0.0180464	0.0130312	0.0206466	0.0104766	0.0487613	0.0065808	0.0236617	0.0181439	0.0107278	0.00430041	0.0284443	0.0114502	0.049416	0.00763153	0.0239906	0.0200829	0.0127215	0.00549091	0.0308049	0.0149391	0.0501422
TYR	LOF	AD	TYR-AD	Severe Paediatric Disorders	Severe Paediatric Disorders	[Skin/hair/eye pigmentation 3, blue/green eyes] (601800) (AD);[Skin/hair/eye pigmentation 3, light/dark/freckling skin] (601800) (AD);{Melanoma, cutaneous malignant, susceptibility to, 8} (601800) (AD);Albinism, oculocutaneous, type IA (203100) (AR);Albinism, oculocutaneous, type IB (606952) (AR)	0.0206466	0.0104766	0.0487613	0.0065808	0.0236617	0.0181439	0.0107278	0.00430041	0.0284443	0.0114502	0.049416	0.00763153	0.0239906	0.0200829	0.0127215	0.00549091	0.0308049	0.0149391	0.0501422	0.00933034	0.0247576	0.0209198	0.0180464	0.0130312	0.0206466	0.0104766	0.0487613	0.0065808	0.0236617	0.0181439	0.0107278	0.00430041	0.0284443	0.0114502	0.049416	0.00763153	0.0239906	0.0200829	0.0127215	0.00549091	0.0308049	0.0149391	0.0501422
GJB2	LOF	AD	GJB2-AD	Palmoplantar keratoderma and erythrokeratodermas	Skin	Bart-Pumphrey syndrome (149200) (AD);Deafness, autosomal dominant 3A (601544) (AD);Deafness, autosomal recessive 1A (220290) (AR, DD);Hystrix-like ichthyosis with deafness (602540) (AD);Keratitis-ichthyosis-deafness syndrome (148210) (AD);Keratoderma, palmoplantar, with deafness (148350) (AD);Vohwinkel syndrome (124500) (AD);Bart-Pumphrey syndrome (149200) (AD);Deafness, autosomal dominant 3A (60…	0.0189406	0.0420321	0.0781722	0.102163	0.0645016	0.0512821	0.0198785	0.0151784	0.0216618	0.0477113	0.0805585	0.103959	0.0646765	0.0531821	0.0230769	0.0187602	0.0230175	0.0498778	0.0823089	0.104317	0.0646765	0.0534611	0.0297117	0.0218617	0.0189406	0.0420321	0.0781722	0.102163	0.0645016	0.0512821	0.0198785	0.0151784	0.0216618	0.0477113	0.0805585	0.103959	0.0646765	0.0531821	0.0230769	0.0187602	0.0230175	0.0498778	0.0823089
GJB2	LOF	AD	GJB2-AD	Severe Paediatric Disorders	Severe Paediatric Disorders	Bart-Pumphrey syndrome (149200) (AD);Deafness, autosomal dominant 3A (601544) (AD);Deafness, autosomal recessive 1A (220290) (AR, DD);Hystrix-like ichthyosis with deafness (602540) (AD);Keratitis-ichthyosis-deafness syndrome (148210) (AD);Keratoderma, palmoplantar, with deafness (148350) (AD);Vohwinkel syndrome (124500) (AD);Bart-Pumphrey syndrome (149200) (AD);Deafness, autosomal dominant 3A (60…	0.0189406	0.0420321	0.0781722	0.102163	0.0645016	0.0512821	0.0198785	0.0151784	0.0216618	0.0477113	0.0805585	0.103959	0.0646765	0.0531821	0.0230769	0.0187602	0.0230175	0.0498778	0.0823089	0.104317	0.0646765	0.0534611	0.0297117	0.0218617	0.0189406	0.0420321	0.0781722	0.102163	0.0645016	0.0512821	0.0198785	0.0151784	0.0216618	0.0477113	0.0805585	0.103959	0.0646765	0.0531821	0.0230769	0.0187602	0.0230175	0.0498778	0.0823089
GJB2	LOF	AD	GJB2-AD	Monogenic hearing loss	Ear	Bart-Pumphrey syndrome (149200) (AD);Deafness, autosomal dominant 3A (601544) (AD);Deafness, autosomal recessive 1A (220290) (AR, DD);Hystrix-like ichthyosis with deafness (602540) (AD);Keratitis-ichthyosis-deafness syndrome (148210) (AD);Keratoderma, palmoplantar, with deafness (148350) (AD);Vohwinkel syndrome (124500) (AD);Bart-Pumphrey syndrome (149200) (AD);Deafness, autosomal dominant 3A (60…	0.0189406	0.0420321	0.0781722	0.102163	0.0645016	0.0512821	0.0198785	0.0151784	0.0216618	0.0477113	0.0805585	0.103959	0.0646765	0.0531821	0.0230769	0.0187602	0.0230175	0.0498778	0.0823089	0.104317	0.0646765	0.0534611	0.0297117	0.0218617	0.0189406	0.0420321	0.0781722	0.102163	0.0645016	0.0512821	0.0198785	0.0151784	0.0216618	0.0477113	0.0805585	0.103959	0.0646765	0.0531821	0.0230769	0.0187602	0.0230175	0.0498778	0.0823089
CYP1B1	LOF	AD	CYP1B1-AD	Severe Paediatric Disorders	Severe Paediatric Disorders	Anterior segment dysgenesis 6, multiple subtypes (617315) (AR);Glaucoma 3A, primary open angle, congenital, juvenile, or adult onset (231300) (AR)	0.0137393	0.0042153	0.000307099	0.00161305	0.00107814	0.00381262	0.00175713	0.00162032	0.0152182	0.00549357	0.00178438	0.00436808	0.00220493	0.00463038	0.00405939	0.00228149	0.0194067	0.00950632	0.00466499	0.00457422	0.0310206	0.0133739	0.0101381	0.00408524	0.0137393	0.0042153	0.000307099	0.00161305	0.00107814	0.00381262	0.00175713	0.00162032	0.0152182	0.00549357	0.00178438	0.00436808	0.00220493	0.00463038	0.00405939	0.00228149	0.0194067	0.00950632	0.00466499
MPL	LOF	AD	MPL-AD	Severe Paediatric Disorders	Severe Paediatric Disorders	Amegakaryocytic thrombocytopenia, congenital, 1 (604498) (AR);Myelofibrosis with myeloid metaplasia, somatic (254450);Thrombocythemia 2 (601977) (AD, SMu);Amegakaryocytic thrombocytopenia, congenital, 1 (604498) (AR);Myelofibrosis with myeloid metaplasia, somatic (254450);Thrombocythemia 2 (601977) (AD, SMu);Amegakaryocytic thrombocytopenia, congenital, 1 (604498) (AR);Myelofibrosis with myeloid …	0.0107119	0.00107267	0.0156453	0.00121313	0.000379457	0.00287161	0.000556346	0.000907469	0.0113976	0.00179984	0.0157206	0.00131867	0.00189654	0.00351995	0.00153495	0.00138482	0.0113976	0.00273686	0.0158713	0.00177137	0.00197181	0.00408513	0.002021	0.00928994	0.0107119	0.00107267	0.0156453	0.00121313	0.000379457	0.00287161	0.000556346	0.000907469	0.0113976	0.00179984	0.0157206	0.00131867	0.00189654	0.00351995	0.00153495	0.00138482	0.0113976	0.00273686	0.0158713
MPL	LOF	AD	MPL-AD	Thrombocythaemia	Hematologic	Amegakaryocytic thrombocytopenia, congenital, 1 (604498) (AR);Myelofibrosis with myeloid metaplasia, somatic (254450);Thrombocythemia 2 (601977) (AD, SMu);Amegakaryocytic thrombocytopenia, congenital, 1 (604498) (AR);Myelofibrosis with myeloid metaplasia, somatic (254450);Thrombocythemia 2 (601977) (AD, SMu);Amegakaryocytic thrombocytopenia, congenital, 1 (604498) (AR);Myelofibrosis with myeloid …	0.0107119	0.00107267	0.0156453	0.00121313	0.000379457	0.00287161	0.000556346	0.000907469	0.0113976	0.00179984	0.0157206	0.00131867	0.00189654	0.00351995	0.00153495	0.00138482	0.0113976	0.00273686	0.0158713	0.00177137	0.00197181	0.00408513	0.002021	0.00928994	0.0107119	0.00107267	0.0156453	0.00121313	0.000379457	0.00287161	0.000556346	0.000907469	0.0113976	0.00179984	0.0157206	0.00131867	0.00189654	0.00351995	0.00153495	0.00138482	0.0113976	0.00273686	0.0158713
CHD2	LOF	AD	CHD2-AD	DDG2P	Congenital/Developmental	Developmental and epileptic encephalopathy 94 (615369) (AD)	0.00917274	0.0349725	0.0178167	0.0138999	0.0113319	0.0109779	0.0179155	0.0188084	0.00917274	0.0367053	0.0183141	0.014055	0.0116122	0.0111855	0.0186403	0.0192883	0.0112727	0.0393789	0.0187355	0.0147087	0.0119873	0.0117728	0.0193781	0.0204287	0.00917274	0.0349725	0.0178167	0.0138999	0.0113319	0.0109779	0.0179155	0.0188084	0.00917274	0.0367053	0.0183141	0.014055	0.0116122	0.0111855	0.0186403	0.0192883	0.0112727	0.0393789	0.0187355
CHD2	LOF	AD	CHD2-AD	Severe Paediatric Disorders	Severe Paediatric Disorders	Developmental and epileptic encephalopathy 94 (615369) (AD)	0.00917274	0.0349725	0.0178167	0.0138999	0.0113319	0.0109779	0.0179155	0.0188084	0.00917274	0.0367053	0.0183141	0.014055	0.0116122	0.0111855	0.0186403	0.0192883	0.0112727	0.0393789	0.0187355	0.0147087	0.0119873	0.0117728	0.0193781	0.0204287	0.00917274	0.0349725	0.0178167	0.0138999	0.0113319	0.0109779	0.0179155	0.0188084	0.00917274	0.0367053	0.0183141	0.014055	0.0116122	0.0111855	0.0186403	0.0192883	0.0112727	0.0393789	0.0187355
CHD2	LOF	AD	CHD2-AD	Early onset or syndromic epilepsy	Neurological	Developmental and epileptic encephalopathy 94 (615369) (AD)	0.00917274	0.0349725	0.0178167	0.0138999	0.0113319	0.0109779	0.0179155	0.0188084	0.00917274	0.0367053	0.0183141	0.014055	0.0116122	0.0111855	0.0186403	0.0192883	0.0112727	0.0393789	0.0187355	0.0147087	0.0119873	0.0117728	0.0193781	0.0204287	0.00917274	0.0349725	0.0178167	0.0138999	0.0113319	0.0109779	0.0179155	0.0188084	0.00917274	0.0367053	0.0183141	0.014055	0.0116122	0.0111855	0.0186403	0.0192883	0.0112727	0.0393789	0.0187355
USH2A	LOF	AD	USH2A-AD	Severe Paediatric Disorders	Severe Paediatric Disorders	Retinitis pigmentosa 39 (613809) (AR);Usher syndrome, type 2A (276901) (AR);Retinitis pigmentosa 39 (613809) (AR);Usher syndrome, type 2A (276901) (AR)	0.00865489	0.0133772	0.00328654	0.00517976	0.00160921	0.0126047	0.00612655	0.00548284	0.0165801	0.0210801	0.0243403	0.0120746	0.00575994	0.0187053	0.0135655	0.0117642	0.0213563	0.0254514	0.0271741	0.023955	0.00899398	0.0215094	0.0168767	0.0142415	0.00865489	0.0133772	0.00328654	0.00517976	0.00160921	0.0126047	0.00612655	0.00548284	0.0165801	0.0210801	0.0243403	0.0120746	0.00575994	0.0187053	0.0135655	0.0117642	0.0213563	0.0254514	0.0271741
CTH	LOF	AD	CTH-AD	Severe Paediatric Disorders	Severe Paediatric Disorders	Cystathioninuria (219500) (AR)	0.00796284	0.0160579	0.0167085	5.04757e-05	0.00779562	0.0189301	0.00361419	0.00352537	0.00796284	0.0162341	0.0167838	0.00517669	0.00798139	0.019332	0.00410193	0.00364442	0.00830675	0.0163221	0.016859	0.00552769	0.00813003	0.0195798	0.00444869	0.00370416	0.00796284	0.0160579	0.0167085	5.04757e-05	0.00779562	0.0189301	0.00361419	0.00352537	0.00796284	0.0162341	0.0167838	0.00517669	0.00798139	0.019332	0.00410193	0.00364442	0.00830675	0.0163221	0.016859
GNE	LOF	AD	GNE-AD	Severe Paediatric Disorders	Severe Paediatric Disorders	Nonaka myopathy (605820) (AR);Sialuria (269921) (AD);Thrombocytopenia 12 with or without myopathy (620757) (AR)	0.00794323	0.000402407	7.65257e-05	0.00362067	0.000149762	0.00207373	0.0246825	0.000896306	0.00969188	0.00120678	0.000459131	0.00818076	0.000411774	0.00274933	0.0254515	0.0019767	0.00969188	0.00165333	0.000535616	0.00873032	0.000486619	0.00331476	0.0259483	0.00227521	0.00794323	0.000402407	7.65257e-05	0.00362067	0.000149762	0.00207373	0.0246825	0.000896306	0.00969188	0.00120678	0.000459131	0.00818076	0.000411774	0.00274933	0.0254515	0.0019767	0.00969188	0.00165333	0.000535616
GNE	LOF	AD	GNE-AD	Lysosomal storage disorder	Metabolic	Nonaka myopathy (605820) (AR);Sialuria (269921) (AD);Thrombocytopenia 12 with or without myopathy (620757) (AR)	0.00794323	0.000402407	7.65257e-05	0.00362067	0.000149762	0.00207373	0.0246825	0.000896306	0.00969188	0.00120678	0.000459131	0.00818076	0.000411774	0.00274933	0.0254515	0.0019767	0.00969188	0.00165333	0.000535616	0.00873032	0.000486619	0.00331476	0.0259483	0.00227521	0.00794323	0.000402407	7.65257e-05	0.00362067	0.000149762	0.00207373	0.0246825	0.000896306	0.00969188	0.00120678	0.000459131	0.00818076	0.000411774	0.00274933	0.0254515	0.0019767	0.00969188	0.00165333	0.000535616
SLFN14	LOF	AD	SLFN14-AD	Inherited bleeding disorders	Hematologic	Bleeding disorder, platelet-type, 20 (616913) (AD)	0.00783185	0.000120113	0	0	0	8.5625e-05	0.000102084	0.000130115	0.00887601	0.00177446	0.00119502	0.00108273	8.1215e-05	0.000544406	0.00157423	0.00666235	0.00887601	0.00177446	0.00119502	0.00108273	8.1215e-05	0.000546259	0.00157423	0.00666235	0.00783185	0.000120113	0	0	0	8.5625e-05	0.000102084	0.000130115	0.00887601	0.00177446	0.00119502	0.00108273	8.1215e-05	0.000544406	0.00157423	0.00666235	0.00887601	0.00177446	0.00119502
SLFN14	LOF	AD	SLFN14-AD	Severe Paediatric Disorders	Severe Paediatric Disorders	Bleeding disorder, platelet-type, 20 (616913) (AD)	0.00783185	0.000120113	0	0	0	8.5625e-05	0.000102084	0.000130115	0.00887601	0.00177446	0.00119502	0.00108273	8.1215e-05	0.000544406	0.00157423	0.00666235	0.00887601	0.00177446	0.00119502	0.00108273	8.1215e-05	0.000546259	0.00157423	0.00666235	0.00783185	0.000120113	0	0	0	8.5625e-05	0.000102084	0.000130115	0.00887601	0.00177446	0.00119502	0.00108273	8.1215e-05	0.000544406	0.00157423	0.00666235	0.00887601	0.00177446	0.00119502
SLC22A5	LOF	AD	SLC22A5-AD	Paediatric or syndromic cardiomyopathy	Cardiovascular	Carnitine deficiency, systemic primary (212140) (AR)	0.00622305	0.00584331	0.00153245	0.00882845	0.00297392	0.00766892	0.00741062	0.00268551	0.00691256	0.00893177	0.0137957	0.00927777	0.00319793	0.00905487	0.0206712	0.0155435	0.00828954	0.0105262	0.0138712	0.00977677	0.00562081	0.0111362	0.021579	0.0177173	0.00622305	0.00584331	0.00153245	0.00882845	0.00297392	0.00766892	0.00741062	0.00268551	0.00691256	0.00893177	0.0137957	0.00927777	0.00319793	0.00905487	0.0206712	0.0155435	0.00828954	0.0105262	0.0138712
LRRK2	LOF	AD	LRRK2-AD	Severe Paediatric Disorders	Severe Paediatric Disorders	{Parkinson disease 8} (607060) (AD)	0.00592792	0.00277245	0.0156456	0.00136136	0.000600631	0.00164476	0.000767426	0.000717339	0.00633793	0.00442261	0.0159476	0.00352563	0.00202547	0.00319783	0.00176658	0.00125695	0.00771762	0.00495711	0.0165499	0.00397796	0.0021012	0.00346324	0.00255649	0.00671737	0.00592792	0.00277245	0.0156456	0.00136136	0.000600631	0.00164476	0.000767426	0.000717339	0.00633793	0.00442261	0.0159476	0.00352563	0.00202547	0.00319783	0.00176658	0.00125695	0.00771762	0.00495711	0.0165499
LRRK2	LOF	AD	LRRK2-AD	Parkinson Disease and Complex Parkinsonism	Neurological	{Parkinson disease 8} (607060) (AD)	0.00592792	0.00277245	0.0156456	0.00136136	0.000600631	0.00164476	0.000767426	0.000717339	0.00633793	0.00442261	0.0159476	0.00352563	0.00202547	0.00319783	0.00176658	0.00125695	0.00771762	0.00495711	0.0165499	0.00397796	0.0021012	0.00346324	0.00255649	0.00671737	0.00592792	0.00277245	0.0156456	0.00136136	0.000600631	0.00164476	0.000767426	0.000717339	0.00633793	0.00442261	0.0159476	0.00352563	0.00202547	0.00319783	0.00176658	0.00125695	0.00771762	0.00495711	0.0165499
MVK	LOF	AD	MVK-AD	Severe Paediatric Disorders	Severe Paediatric Disorders	Hyper-IgD syndrome (260920) (AR);Mevalonic aciduria (610377) (AR);Porokeratosis 3, multiple types (175900) (AD)	0.00520644	0.00330372	0.000688474	0.000352583	0.00465035	0.00620413	0.00247792	0.00238672	0.00520644	0.00388298	0.000688474	0.00100714	0.00476334	0.00675302	0.00321874	0.00262519	0.00591296	0.00419475	0.000688474	0.00146025	0.00554562	0.00721565	0.00400429	0.0033399	0.00520644	0.00330372	0.000688474	0.000352583	0.00465035	0.00620413	0.00247792	0.00238672	0.00520644	0.00388298	0.000688474	0.00100714	0.00476334	0.00675302	0.00321874	0.00262519	0.00591296	0.00419475	0.000688474
MVK	LOF	AD	MVK-AD	Undiagnosed metabolic disorders	Metabolic	Hyper-IgD syndrome (260920) (AR);Mevalonic aciduria (610377) (AR);Porokeratosis 3, multiple types (175900) (AD)	0.00520644	0.00330372	0.000688474	0.000352583	0.00465035	0.00620413	0.00247792	0.00238672	0.00520644	0.00388298	0.000688474	0.00100714	0.00476334	0.00675302	0.00321874	0.00262519	0.00591296	0.00419475	0.000688474	0.00146025	0.00554562	0.00721565	0.00400429	0.0033399	0.00520644	0.00330372	0.000688474	0.000352583	0.00465035	0.00620413	0.00247792	0.00238672	0.00520644	0.00388298	0.000688474	0.00100714	0.00476334	0.00675302	0.00321874	0.00262519	0.00591296	0.00419475	0.000688474
MVK	LOF	AD	MVK-AD	Familial disseminated superficial actinic porokeratosis	Skin	Hyper-IgD syndrome (260920) (AR);Mevalonic aciduria (610377) (AR);Porokeratosis 3, multiple types (175900) (AD)	0.00520644	0.00330372	0.000688474	0.000352583	0.00465035	0.00620413	0.00247792	0.00238672	0.00520644	0.00388298	0.000688474	0.00100714	0.00476334	0.00675302	0.00321874	0.00262519	0.00591296	0.00419475	0.000688474	0.00146025	0.00554562	0.00721565	0.00400429	0.0033399	0.00520644	0.00330372	0.000688474	0.000352583	0.00465035	0.00620413	0.00247792	0.00238672	0.00520644	0.00388298	0.000688474	0.00100714	0.00476334	0.00675302	0.00321874	0.00262519	0.00591296	0.00419475	0.000688474
DHTKD1	LOF	AD	DHTKD1-AD	Severe Paediatric Disorders	Severe Paediatric Disorders	?Charcot-Marie-Tooth disease, axonal, type 2Q (615025) (AD);Alpha-aminoadipic and alpha-ketoadipic aciduria (204750) (AR)	0.00487082	0.000644592	7.65199e-05	0.00131865	0.000112722	0.000878484	0.00106043	0.000418494	0.00522961	0.00151275	0.000153034	0.00239001	0.000641701	0.00175174	0.00178865	0.00179737	0.00557447	0.00174529	0.000306279	0.00294399	0.000641701	0.00200171	0.00259178	0.00368148	0.00487082	0.000644592	7.65199e-05	0.00131865	0.000112722	0.000878484	0.00106043	0.000418494	0.00522961	0.00151275	0.000153034	0.00239001	0.000641701	0.00175174	0.00178865	0.00179737	0.00557447	0.00174529	0.000306279
VWF	LOF	AD	VWF-AD	Severe Paediatric Disorders	Severe Paediatric Disorders	von Willebrand disease, type 1 (193400) (AD);von Willebrand disease, type 3 (277480) (AR);von Willebrand disease, types 2A, 2B, 2M, and 2N (613554) (AD, AR)	0.00454696	0.00593101	0.00351385	0.000654837	0.013282	0.0140884	0.00289908	0.00346041	0.0254942	0.0157085	0.0578395	0.00337413	0.031554	0.0270364	0.0157922	0.00817538	0.0308968	0.0211951	0.0700605	0.0156988	0.0318442	0.0305048	0.0302102	0.0239288	0.00454696	0.00593101	0.00351385	0.000654837	0.013282	0.0140884	0.00289908	0.00346041	0.0254942	0.0157085	0.0578395	0.00337413	0.031554	0.0270364	0.0157922	0.00817538	0.0308968	0.0211951	0.0700605
VWF	LOF	AD	VWF-AD	Inherited bleeding disorders	Hematologic	von Willebrand disease, type 1 (193400) (AD);von Willebrand disease, type 3 (277480) (AR);von Willebrand disease, types 2A, 2B, 2M, and 2N (613554) (AD, AR)	0.00454696	0.00593101	0.00351385	0.000654837	0.013282	0.0140884	0.00289908	0.00346041	0.0254942	0.0157085	0.0578395	0.00337413	0.031554	0.0270364	0.0157922	0.00817538	0.0308968	0.0211951	0.0700605	0.0156988	0.0318442	0.0305048	0.0302102	0.0239288	0.00454696	0.00593101	0.00351385	0.000654837	0.013282	0.0140884	0.00289908	0.00346041	0.0254942	0.0157085	0.0578395	0.00337413	0.031554	0.0270364	0.0157922	0.00817538	0.0308968	0.0211951	0.0700605
ABCC6	LOF	AD	ABCC6-AD	Severe Paediatric Disorders	Severe Paediatric Disorders	Arterial calcification, generalized, of infancy, 2 (614473) (AR);Pseudoxanthoma elasticum (264800) (AR);Pseudoxanthoma elasticum, forme fruste (177850) (AD)	0.00454005	0.00599316	0.0024459	0.0258145	0.00721192	0.0089609	0.00310656	0.00836494	0.00876694	0.00924353	0.00420038	0.0289987	0.00908007	0.0117536	0.00664847	0.0112764	0.0178297	0.0236579	0.00450655	0.0374837	0.0116694	0.0171372	0.0178869	0.0197148	0.00454005	0.00599316	0.0024459	0.0258145	0.00721192	0.0089609	0.00310656	0.00836494	0.00876694	0.00924353	0.00420038	0.0289987	0.00908007	0.0117536	0.00664847	0.0112764	0.0178297	0.0236579	0.00450655
ABCC6	LOF	AD	ABCC6-AD	Familial cerebral small vessel disease	Neurological	Arterial calcification, generalized, of infancy, 2 (614473) (AR);Pseudoxanthoma elasticum (264800) (AR);Pseudoxanthoma elasticum, forme fruste (177850) (AD)	0.00454005	0.00599316	0.0024459	0.0258145	0.00721192	0.0089609	0.00310656	0.00836494	0.00876694	0.00924353	0.00420038	0.0289987	0.00908007	0.0117536	0.00664847	0.0112764	0.0178297	0.0236579	0.00450655	0.0374837	0.0116694	0.0171372	0.0178869	0.0197148	0.00454005	0.00599316	0.0024459	0.0258145	0.00721192	0.0089609	0.00310656	0.00836494	0.00876694	0.00924353	0.00420038	0.0289987	0.00908007	0.0117536	0.00664847	0.0112764	0.0178297	0.0236579	0.00450655
TTN	LOF	AD	TTN-AD	Severe Paediatric Disorders	Severe Paediatric Disorders	Cardiomyopathy, dilated, 1G (604145) (AD);Cardiomyopathy, familial hypertrophic, 9 (613765) (AD);Congenital myopathy 5 with cardiomyopathy (611705) (AR);Muscular dystrophy, limb-girdle, autosomal recessive 10 (608807) (AR);Myopathy, myofibrillar, 9, with early respiratory failure (603689) (AD);Tibial muscular dystrophy, tardive (600334) (AD)	0.00450977	0.00316007	0.00406949	0.00309022	0.00224897	0.00379997	0.0035553	0.00379005	0.0154821	0.014525	0.00774866	0.0184145	0.00618694	0.0124457	0.016666	0.0144802	0.0234308	0.0187835	0.00946446	0.0222229	0.00678223	0.015943	0.0186538	0.0227166	0.00450977	0.00316007	0.00406949	0.00309022	0.00224897	0.00379997	0.0035553	0.00379005	0.0154821	0.014525	0.00774866	0.0184145	0.00618694	0.0124457	0.016666	0.0144802	0.0234308	0.0187835	0.00946446
TTN	LOF	AD	TTN-AD	Distal myopathies	Neuromuscular	Cardiomyopathy, dilated, 1G (604145) (AD);Cardiomyopathy, familial hypertrophic, 9 (613765) (AD);Congenital myopathy 5 with cardiomyopathy (611705) (AR);Muscular dystrophy, limb-girdle, autosomal recessive 10 (608807) (AR);Myopathy, myofibrillar, 9, with early respiratory failure (603689) (AD);Tibial muscular dystrophy, tardive (600334) (AD)	0.00450977	0.00316007	0.00406949	0.00309022	0.00224897	0.00379997	0.0035553	0.00379005	0.0154821	0.014525	0.00774866	0.0184145	0.00618694	0.0124457	0.016666	0.0144802	0.0234308	0.0187835	0.00946446	0.0222229	0.00678223	0.015943	0.0186538	0.0227166	0.00450977	0.00316007	0.00406949	0.00309022	0.00224897	0.00379997	0.0035553	0.00379005	0.0154821	0.014525	0.00774866	0.0184145	0.00618694	0.0124457	0.016666	0.0144802	0.0234308	0.0187835	0.00946446
TTN	LOF	AD	TTN-AD	Dilated Cardiomyopathy and conduction defects	Cardiovascular	Cardiomyopathy, dilated, 1G (604145) (AD);Cardiomyopathy, familial hypertrophic, 9 (613765) (AD);Congenital myopathy 5 with cardiomyopathy (611705) (AR);Muscular dystrophy, limb-girdle, autosomal recessive 10 (608807) (AR);Myopathy, myofibrillar, 9, with early respiratory failure (603689) (AD);Tibial muscular dystrophy, tardive (600334) (AD)	0.00450977	0.00316007	0.00406949	0.00309022	0.00224897	0.00379997	0.0035553	0.00379005	0.0154821	0.014525	0.00774866	0.0184145	0.00618694	0.0124457	0.016666	0.0144802	0.0234308	0.0187835	0.00946446	0.0222229	0.00678223	0.015943	0.0186538	0.0227166	0.00450977	0.00316007	0.00406949	0.00309022	0.00224897	0.00379997	0.0035553	0.00379005	0.0154821	0.014525	0.00774866	0.0184145	0.00618694	0.0124457	0.016666	0.0144802	0.0234308	0.0187835	0.00946446
LDLR	LOF	AD	LDLR-AD	Severe Paediatric Disorders	Severe Paediatric Disorders	Hypercholesterolemia, familial, 1 (143890) (AD, AR);LDL cholesterol level QTL2 (143890) (AD, AR);Hypercholesterolemia, familial, 1 (143890) (AD, AR);LDL cholesterol level QTL2 (143890) (AD, AR);Hypercholesterolemia, familial, 1 (143890) (AD, AR);LDL cholesterol level QTL2 (143890) (AD, AR);Hypercholesterolemia, familial, 1 (143890) (AD, AR);LDL cholesterol level QTL2 (143890) (AD, AR)	0.00450121	0.003171	0.00209846	0.00577905	0.00180047	0.00328698	0.00511355	0.00233032	0.0069205	0.00544205	0.00270919	0.00698145	0.00200595	0.00422981	0.00769398	0.00489029	0.00932788	0.00602034	0.0028619	0.014954	0.00245572	0.00494431	0.00969371	0.00673158	0.00450121	0.003171	0.00209846	0.00577905	0.00180047	0.00328698	0.00511355	0.00233032	0.0069205	0.00544205	0.00270919	0.00698145	0.00200595	0.00422981	0.00769398	0.00489029	0.00932788	0.00602034	0.0028619
LDLR	LOF	AD	LDLR-AD	Familial hypercholesterolaemia	Metabolic	Hypercholesterolemia, familial, 1 (143890) (AD, AR);LDL cholesterol level QTL2 (143890) (AD, AR);Hypercholesterolemia, familial, 1 (143890) (AD, AR);LDL cholesterol level QTL2 (143890) (AD, AR);Hypercholesterolemia, familial, 1 (143890) (AD, AR);LDL cholesterol level QTL2 (143890) (AD, AR);Hypercholesterolemia, familial, 1 (143890) (AD, AR);LDL cholesterol level QTL2 (143890) (AD, AR)	0.00450121	0.003171	0.00209846	0.00577905	0.00180047	0.00328698	0.00511355	0.00233032	0.0069205	0.00544205	0.00270919	0.00698145	0.00200595	0.00422981	0.00769398	0.00489029	0.00932788	0.00602034	0.0028619	0.014954	0.00245572	0.00494431	0.00969371	0.00673158	0.00450121	0.003171	0.00209846	0.00577905	0.00180047	0.00328698	0.00511355	0.00233032	0.0069205	0.00544205	0.00270919	0.00698145	0.00200595	0.00422981	0.00769398	0.00489029	0.00932788	0.00602034	0.0028619
LDLR	LOF	AD	LDLR-AD	Additional findings health related - children	Metabolic	Hypercholesterolemia, familial, 1 (143890) (AD, AR);LDL cholesterol level QTL2 (143890) (AD, AR);Hypercholesterolemia, familial, 1 (143890) (AD, AR);LDL cholesterol level QTL2 (143890) (AD, AR);Hypercholesterolemia, familial, 1 (143890) (AD, AR);LDL cholesterol level QTL2 (143890) (AD, AR);Hypercholesterolemia, familial, 1 (143890) (AD, AR);LDL cholesterol level QTL2 (143890) (AD, AR)	0.00450121	0.003171	0.00209846	0.00577905	0.00180047	0.00328698	0.00511355	0.00233032	0.0069205	0.00544205	0.00270919	0.00698145	0.00200595	0.00422981	0.00769398	0.00489029	0.00932788	0.00602034	0.0028619	0.014954	0.00245572	0.00494431	0.00969371	0.00673158	0.00450121	0.003171	0.00209846	0.00577905	0.00180047	0.00328698	0.00511355	0.00233032	0.0069205	0.00544205	0.00270919	0.00698145	0.00200595	0.00422981	0.00769398	0.00489029	0.00932788	0.00602034	0.0028619
SLC3A1	LOF	AD	SLC3A1-AD	Severe Paediatric Disorders	Severe Paediatric Disorders	Cystinuria (220100) (AD, AR);Cystinuria (220100) (AD, AR)	0.00449903	0.00273079	0.0250129	0.000604562	0.00355054	0.00974899	0.00194591	0.00296087	0.00863285	0.00415692	0.0294033	0.00407301	0.00425918	0.0116252	0.00499621	0.00456842	0.0165094	0.0140822	0.0579916	0.0101833	0.00478099	0.0149265	0.00902557	0.00978876	0.00449903	0.00273079	0.0250129	0.000604562	0.00355054	0.00974899	0.00194591	0.00296087	0.00863285	0.00415692	0.0294033	0.00407301	0.00425918	0.0116252	0.00499621	0.00456842	0.0165094	0.0140822	0.0579916
SLC3A1	LOF	AD	SLC3A1-AD	Undiagnosed metabolic disorders	Metabolic	Cystinuria (220100) (AD, AR);Cystinuria (220100) (AD, AR)	0.00449903	0.00273079	0.0250129	0.000604562	0.00355054	0.00974899	0.00194591	0.00296087	0.00863285	0.00415692	0.0294033	0.00407301	0.00425918	0.0116252	0.00499621	0.00456842	0.0165094	0.0140822	0.0579916	0.0101833	0.00478099	0.0149265	0.00902557	0.00978876	0.00449903	0.00273079	0.0250129	0.000604562	0.00355054	0.00974899	0.00194591	0.00296087	0.00863285	0.00415692	0.0294033	0.00407301	0.00425918	0.0116252	0.00499621	0.00456842	0.0165094	0.0140822	0.0579916
SLC3A1	LOF	AD	SLC3A1-AD	Nephrocalcinosis or nephrolithiasis	Kidney/Urinary System	Cystinuria (220100) (AD, AR);Cystinuria (220100) (AD, AR)	0.00449903	0.00273079	0.0250129	0.000604562	0.00355054	0.00974899	0.00194591	0.00296087	0.00863285	0.00415692	0.0294033	0.00407301	0.00425918	0.0116252	0.00499621	0.00456842	0.0165094	0.0140822	0.0579916	0.0101833	0.00478099	0.0149265	0.00902557	0.00978876	0.00449903	0.00273079	0.0250129	0.000604562	0.00355054	0.00974899	0.00194591	0.00296087	0.00863285	0.00415692	0.0294033	0.00407301	0.00425918	0.0116252	0.00499621	0.00456842	0.0165094	0.0140822	0.0579916
PRRT2	LOF	AD	PRRT2-AD	DDG2P	Congenital/Developmental	Convulsions, familial infantile, with paroxysmal choreoathetosis (602066) (AD);Episodic kinesigenic dyskinesia 1 (128200) (AD);Seizures, benign familial infantile, 2 (605751) (AD)	0.00446909	0.00991397	0.00602442	0.0029829	0.0106536	0.00500164	0.0052677	0.0066351	0.00446909	0.00996171	0.00602442	0.00308657	0.0115264	0.00506318	0.0053629	0.00675427	0.00446909	0.00996171	0.00602442	0.00318707	0.0115646	0.00514028	0.00540929	0.00675427	0.00446909	0.00991397	0.00602442	0.0029829	0.0106536	0.00500164	0.0052677	0.0066351	0.00446909	0.00996171	0.00602442	0.00308657	0.0115264	0.00506318	0.0053629	0.00675427	0.00446909	0.00996171	0.00602442
PRRT2	LOF	AD	PRRT2-AD	Severe Paediatric Disorders	Severe Paediatric Disorders	Convulsions, familial infantile, with paroxysmal choreoathetosis (602066) (AD);Episodic kinesigenic dyskinesia 1 (128200) (AD);Seizures, benign familial infantile, 2 (605751) (AD)	0.00446909	0.00991397	0.00602442	0.0029829	0.0106536	0.00500164	0.0052677	0.0066351	0.00446909	0.00996171	0.00602442	0.00308657	0.0115264	0.00506318	0.0053629	0.00675427	0.00446909	0.00996171	0.00602442	0.00318707	0.0115646	0.00514028	0.00540929	0.00675427	0.00446909	0.00991397	0.00602442	0.0029829	0.0106536	0.00500164	0.0052677	0.0066351	0.00446909	0.00996171	0.00602442	0.00308657	0.0115264	0.00506318	0.0053629	0.00675427	0.00446909	0.00996171	0.00602442
PRRT2	LOF	AD	PRRT2-AD	Brain channelopathy	Neurological	Convulsions, familial infantile, with paroxysmal choreoathetosis (602066) (AD);Episodic kinesigenic dyskinesia 1 (128200) (AD);Seizures, benign familial infantile, 2 (605751) (AD)	0.00446909	0.00991397	0.00602442	0.0029829	0.0106536	0.00500164	0.0052677	0.0066351	0.00446909	0.00996171	0.00602442	0.00308657	0.0115264	0.00506318	0.0053629	0.00675427	0.00446909	0.00996171	0.00602442	0.00318707	0.0115646	0.00514028	0.00540929	0.00675427	0.00446909	0.00991397	0.00602442	0.0029829	0.0106536	0.00500164	0.0052677	0.0066351	0.00446909	0.00996171	0.00602442	0.00308657	0.0115264	0.00506318	0.0053629	0.00675427	0.00446909	0.00996171	0.00602442
F11	LOF	AD	F11-AD	Severe Paediatric Disorders	Severe Paediatric Disorders	Factor XI deficiency, autosomal dominant (612416);Factor XI deficiency, autosomal recessive (612416)	0.00415391	0.00272671	0.081054	0.00417401	0.000149792	0.00211891	0.0019697	0.000716876	0.00725792	0.00393015	0.0812643	0.00597855	0.0031774	0.00499952	0.00460497	0.00238816	0.0100141	0.00539907	0.0813343	0.00647937	0.00340133	0.00589418	0.00571572	0.00328204	0.00415391	0.00272671	0.081054	0.00417401	0.000149792	0.00211891	0.0019697	0.000716876	0.00725792	0.00393015	0.0812643	0.00597855	0.0031774	0.00499952	0.00460497	0.00238816	0.0100141	0.00539907	0.0813343
F11	LOF	AD	F11-AD	Inherited bleeding disorders	Hematologic	Factor XI deficiency, autosomal dominant (612416);Factor XI deficiency, autosomal recessive (612416)	0.00415391	0.00272671	0.081054	0.00417401	0.000149792	0.00211891	0.0019697	0.000716876	0.00725792	0.00393015	0.0812643	0.00597855	0.0031774	0.00499952	0.00460497	0.00238816	0.0100141	0.00539907	0.0813343	0.00647937	0.00340133	0.00589418	0.00571572	0.00328204	0.00415391	0.00272671	0.081054	0.00417401	0.000149792	0.00211891	0.0019697	0.000716876	0.00725792	0.00393015	0.0812643	0.00597855	0.0031774	0.00499952	0.00460497	0.00238816	0.0100141	0.00539907	0.0813343
SEC23B	LOF	AD	SEC23B-AD	Severe Paediatric Disorders	Severe Paediatric Disorders	?Cowden syndrome 7 (616858) (AD);Dyserythropoietic anemia, congenital, type II (224100) (AR);?Cowden syndrome 7 (616858) (AD);Dyserythropoietic anemia, congenital, type II (224100) (AR)	0.0038675	0.00214423	0.000306161	0.000503717	0.000224986	0.00198905	0.000836438	0.000597393	0.00421308	0.00272429	0.000460091	0.000807178	0.000935991	0.00256301	0.00174107	0.000716789	0.00707311	0.00285869	0.000460091	0.00141109	0.00198287	0.0027012	0.00188112	0.000895934	0.0038675	0.00214423	0.000306161	0.000503717	0.000224986	0.00198905	0.000836438	0.000597393	0.00421308	0.00272429	0.000460091	0.000807178	0.000935991	0.00256301	0.00174107	0.000716789	0.00707311	0.00285869	0.000460091
SEC23B	LOF	AD	SEC23B-AD	Congenital disorders of glycosylation	Metabolic	?Cowden syndrome 7 (616858) (AD);Dyserythropoietic anemia, congenital, type II (224100) (AR);?Cowden syndrome 7 (616858) (AD);Dyserythropoietic anemia, congenital, type II (224100) (AR)	0.0038675	0.00214423	0.000306161	0.000503717	0.000224986	0.00198905	0.000836438	0.000597393	0.00421308	0.00272429	0.000460091	0.000807178	0.000935991	0.00256301	0.00174107	0.000716789	0.00707311	0.00285869	0.000460091	0.00141109	0.00198287	0.0027012	0.00188112	0.000895934	0.0038675	0.00214423	0.000306161	0.000503717	0.000224986	0.00198905	0.000836438	0.000597393	0.00421308	0.00272429	0.000460091	0.000807178	0.000935991	0.00256301	0.00174107	0.000716789	0.00707311	0.00285869	0.000460091
CHEK2	LOF	AD	CHEK2-AD	Familial breast cancer	Neoplasm	Osteosarcoma, somatic (259500);Prostate cancer, somatic (176807);Tumor predisposition syndrome 4, breast/prostate/colorectal (609265);Osteosarcoma, somatic (259500);Prostate cancer, somatic (176807);Tumor predisposition syndrome 4, breast/prostate/colorectal (609265);Osteosarcoma, somatic (259500);Prostate cancer, somatic (176807);Tumor predisposition syndrome 4, breast/prostate/colorectal (60926…	0.00382361	0.00162795	7.90233e-05	0.000458102	0.00311876	0.00184052	0.00315606	0.000430628	0.00523221	0.00284756	0.022125	0.00121428	0.00344789	0.00294627	0.00378357	0.000674033	0.0145892	0.0084186	0.0344631	0.00187556	0.00352287	0.00439081	0.00539975	0.00115434	0.00382361	0.00162795	7.90233e-05	0.000458102	0.00311876	0.00184052	0.00315606	0.000430628	0.00523221	0.00284756	0.022125	0.00121428	0.00344789	0.00294627	0.00378357	0.000674033	0.0145892	0.0084186	0.0344631
CAPN3	LOF	AD	CAPN3-AD	Severe Paediatric Disorders	Severe Paediatric Disorders	Muscular dystrophy, limb-girdle, autosomal dominant 4 (618129) (AD);Muscular dystrophy, limb-girdle, autosomal recessive 1 (253600) (AR)	0.00381745	0.00289279	0.000535575	0.003023	0.000935911	0.00405475	0.0022918	0.00256637	0.00727992	0.00425057	0.000612089	0.00424474	0.00183577	0.00744008	0.00516212	0.00405735	0.0169537	0.00647647	0.00130046	0.00745021	0.00276985	0.00952154	0.0103886	0.0108271	0.00381745	0.00289279	0.000535575	0.003023	0.000935911	0.00405475	0.0022918	0.00256637	0.00727992	0.00425057	0.000612089	0.00424474	0.00183577	0.00744008	0.00516212	0.00405735	0.0169537	0.00647647	0.00130046
FLG	LOF	AD	FLG-AD	Ichthyosis and erythrokeratoderma	Skin	{Dermatitis, atopic, susceptibility to, 2} (605803);Ichthyosis vulgaris (146700) (AD, AR)	0.00347393	0.0142103	0.023743	0.0370755	0.021479	0.0632294	0.0220312	0.0312733	0.0236893	0.0226132	0.0286665	0.0695083	0.0279095	0.0693618	0.03729	0.0944733	0.0243659	0.0227443	0.0287409	0.0699757	0.0279095	0.0695388	0.0374015	0.0952262	0.00347393	0.0142103	0.023743	0.0370755	0.021479	0.0632294	0.0220312	0.0312733	0.0236893	0.0226132	0.0286665	0.0695083	0.0279095	0.0693618	0.03729	0.0944733	0.0243659	0.0227443	0.0287409
BRCA2	LOF	AD	BRCA2-AD	Familial breast cancer	Neoplasm	{Breast cancer, male, susceptibility to} (114480) (AD, SMu);{Breast-ovarian cancer, familial, 2} (612555) (AD);{Glioblastoma 3} (613029) (AR);{Medulloblastoma} (155255) (AD, AR, SMu);{Pancreatic cancer 2} (613347);{Prostate cancer} (176807) (AD, SMu);Fanconi anemia, complementation group D1 (605724) (AR);Wilms tumor (194070) (AD, SMu);{Breast cancer, male, susceptibility to} (114480) (AD, SMu);{B…	0.00347351	0.00325314	0.0115275	0.00378215	0.00168693	0.00347222	0.0033737	0.00290465	0.00381911	0.0034328	0.0116033	0.00408454	0.00295831	0.00375676	0.00386209	0.00338759	0.00381911	0.00347737	0.0116033	0.00453744	0.00295831	0.0037944	0.00413928	0.0038639	0.00347351	0.00325314	0.0115275	0.00378215	0.00168693	0.00347222	0.0033737	0.00290465	0.00381911	0.0034328	0.0116033	0.00408454	0.00295831	0.00375676	0.00386209	0.00338759	0.00381911	0.00347737	0.0116033
BRCA2	LOF	AD	BRCA2-AD	Additional findings health related - adult specific	Neoplasm	{Breast cancer, male, susceptibility to} (114480) (AD, SMu);{Breast-ovarian cancer, familial, 2} (612555) (AD);{Glioblastoma 3} (613029) (AR);{Medulloblastoma} (155255) (AD, AR, SMu);{Pancreatic cancer 2} (613347);{Prostate cancer} (176807) (AD, SMu);Fanconi anemia, complementation group D1 (605724) (AR);Wilms tumor (194070) (AD, SMu);{Breast cancer, male, susceptibility to} (114480) (AD, SMu);{B…	0.00347351	0.00325314	0.0115275	0.00378215	0.00168693	0.00347222	0.0033737	0.00290465	0.00381911	0.0034328	0.0116033	0.00408454	0.00295831	0.00375676	0.00386209	0.00338759	0.00381911	0.00347737	0.0116033	0.00453744	0.00295831	0.0037944	0.00413928	0.0038639	0.00347351	0.00325314	0.0115275	0.00378215	0.00168693	0.00347222	0.0033737	0.00290465	0.00381911	0.0034328	0.0116033	0.00408454	0.00295831	0.00375676	0.00386209	0.00338759	0.00381911	0.00347737	0.0116033
ATM	LOF	AD	ATM-AD	Familial breast cancer	Neoplasm	{Breast cancer, susceptibility to} (114480) (AD, SMu);Ataxia-telangiectasia (208900) (AR);Lymphoma, B-cell non-Hodgkin, somatic;Lymphoma, mantle cell, somatic;T-cell prolymphocytic leukemia, somatic;{Breast cancer, susceptibility to} (114480) (AD, SMu);Ataxia-telangiectasia (208900) (AR);Lymphoma, B-cell non-Hodgkin, somatic;Lymphoma, mantle cell, somatic;T-cell prolymphocytic leukemia, somatic;{…	0.00346693	0.00348356	0.00237208	0.00192019	0.00164888	0.0042528	0.00250293	0.00320018	0.00629285	0.00455281	0.00267747	0.0028772	0.00217378	0.00501205	0.00402965	0.00505249	0.00629285	0.00482002	0.0027538	0.0031287	0.00224854	0.00536506	0.00483882	0.00558798	0.00346693	0.00348356	0.00237208	0.00192019	0.00164888	0.0042528	0.00250293	0.00320018	0.00629285	0.00455281	0.00267747	0.0028772	0.00217378	0.00501205	0.00402965	0.00505249	0.00629285	0.00482002	0.0027538
SPG7	LOF	AD	SPG7-AD	Severe Paediatric Disorders	Severe Paediatric Disorders	Spastic paraplegia 7, autosomal recessive (607259) (AD, AR)	0.00315055	0.00611702	0.00488732	0.00136549	0.00469205	0.0217739	0.00893809	0.00521636	0.00349613	0.0082083	0.00505037	0.00217068	0.00555718	0.0230102	0.00971937	0.00610836	0.00384474	0.00927214	0.00505037	0.00513212	0.00559447	0.0238112	0.0100638	0.00622755	0.00315055	0.00611702	0.00488732	0.00136549	0.00469205	0.0217739	0.00893809	0.00521636	0.00349613	0.0082083	0.00505037	0.00217068	0.00555718	0.0230102	0.00971937	0.00610836	0.00384474	0.00927214	0.00505037
SPG7	LOF	AD	SPG7-AD	Ataxia and cerebellar anomalies - narrow panel	Neurological	Spastic paraplegia 7, autosomal recessive (607259) (AD, AR)	0.00315055	0.00611702	0.00488732	0.00136549	0.00469205	0.0217739	0.00893809	0.00521636	0.00349613	0.0082083	0.00505037	0.00217068	0.00555718	0.0230102	0.00971937	0.00610836	0.00384474	0.00927214	0.00505037	0.00513212	0.00559447	0.0238112	0.0100638	0.00622755	0.00315055	0.00611702	0.00488732	0.00136549	0.00469205	0.0217739	0.00893809	0.00521636	0.00349613	0.0082083	0.00505037	0.00217068	0.00555718	0.0230102	0.00971937	0.00610836	0.00384474	0.00927214	0.00505037
SPG7	LOF	AD	SPG7-AD	Mitochondrial DNA maintenance disorder	Mitochrondrial	Spastic paraplegia 7, autosomal recessive (607259) (AD, AR)	0.00315055	0.00611702	0.00488732	0.00136549	0.00469205	0.0217739	0.00893809	0.00521636	0.00349613	0.0082083	0.00505037	0.00217068	0.00555718	0.0230102	0.00971937	0.00610836	0.00384474	0.00927214	0.00505037	0.00513212	0.00559447	0.0238112	0.0100638	0.00622755	0.00315055	0.00611702	0.00488732	0.00136549	0.00469205	0.0217739	0.00893809	0.00521636	0.00349613	0.0082083	0.00505037	0.00217068	0.00555718	0.0230102	0.00971937	0.00610836	0.00384474	0.00927214	0.00505037
SPG7	LOF	AD	SPG7-AD	Undiagnosed metabolic disorders	Metabolic	Spastic paraplegia 7, autosomal recessive (607259) (AD, AR)	0.00315055	0.00611702	0.00488732	0.00136549	0.00469205	0.0217739	0.00893809	0.00521636	0.00349613	0.0082083	0.00505037	0.00217068	0.00555718	0.0230102	0.00971937	0.00610836	0.00384474	0.00927214	0.00505037	0.00513212	0.00559447	0.0238112	0.0100638	0.00622755	0.00315055	0.00611702	0.00488732	0.00136549	0.00469205	0.0217739	0.00893809	0.00521636	0.00349613	0.0082083	0.00505037	0.00217068	0.00555718	0.0230102	0.00971937	0.00610836	0.00384474	0.00927214	0.00505037
SPG7	LOF	AD	SPG7-AD	Optic neuropathy	Eye	Spastic paraplegia 7, autosomal recessive (607259) (AD, AR)	0.00315055	0.00611702	0.00488732	0.00136549	0.00469205	0.0217739	0.00893809	0.00521636	0.00349613	0.0082083	0.00505037	0.00217068	0.00555718	0.0230102	0.00971937	0.00610836	0.00384474	0.00927214	0.00505037	0.00513212	0.00559447	0.0238112	0.0100638	0.00622755	0.00315055	0.00611702	0.00488732	0.00136549	0.00469205	0.0217739	0.00893809	0.00521636	0.00349613	0.0082083	0.00505037	0.00217068	0.00555718	0.0230102	0.00971937	0.00610836	0.00384474	0.00927214	0.00505037
PKHD1	LOF	AD	PKHD1-AD	Polycystic liver disease	Gastrointestinal	Polycystic kidney disease 4, with or without hepatic disease (263200) (AR)	0.00277466	0.00482105	0.000306874	0.0111261	0.0167084	0.00561271	0.00458873	0.00329886	0.0124801	0.0124486	0.0155014	0.0175409	0.0311491	0.0127717	0.0157859	0.0152375	0.0271012	0.0200189	0.0313479	0.0219894	0.0328169	0.0178242	0.0233156	0.0228117	0.00277466	0.00482105	0.000306874	0.0111261	0.0167084	0.00561271	0.00458873	0.00329886	0.0124801	0.0124486	0.0155014	0.0175409	0.0311491	0.0127717	0.0157859	0.0152375	0.0271012	0.0200189	0.0313479
PKHD1	LOF	AD	PKHD1-AD	Ductal plate malformation	Congenital/Developmental	Polycystic kidney disease 4, with or without hepatic disease (263200) (AR)	0.00277466	0.00482105	0.000306874	0.0111261	0.0167084	0.00561271	0.00458873	0.00329886	0.0124801	0.0124486	0.0155014	0.0175409	0.0311491	0.0127717	0.0157859	0.0152375	0.0271012	0.0200189	0.0313479	0.0219894	0.0328169	0.0178242	0.0233156	0.0228117	0.00277466	0.00482105	0.000306874	0.0111261	0.0167084	0.00561271	0.00458873	0.00329886	0.0124801	0.0124486	0.0155014	0.0175409	0.0311491	0.0127717	0.0157859	0.0152375	0.0271012	0.0200189	0.0313479
DUOX2	LOF	AD	DUOX2-AD	Congenital hypothyroidism	Endocrine	Thyroid dyshormonogenesis 6 (607200) (AR)	0.0027702	0.00628943	7.65726e-05	0.0260568	0.0224843	0.00797734	0.00776509	0.00393597	0.00519034	0.0108227	0.000306097	0.0329975	0.0226317	0.00891214	0.00869061	0.0105832	0.00587997	0.0112649	0.00724329	0.0364479	0.0262103	0.0113583	0.00974735	0.0130033	0.0027702	0.00628943	7.65726e-05	0.0260568	0.0224843	0.00797734	0.00776509	0.00393597	0.00519034	0.0108227	0.000306097	0.0329975	0.0226317	0.00891214	0.00869061	0.0105832	0.00587997	0.0112649	0.00724329
HBA1	LOF	AD	HBA1-AD	Severe Paediatric Disorders	Severe Paediatric Disorders	Erythrocytosis, familial, 7 (617981) (AD);Heinz body anemias, alpha- (140700) (AD);Hemoglobin H disease, nondeletional (613978);Methemoglobinemia, alpha type (617973) (AD);Thalassemias, alpha- (604131);Erythrocytosis, familial, 7 (617981) (AD);Heinz body anemias, alpha- (140700) (AD);Hemoglobin H disease, nondeletional (613978);Methemoglobinemia, alpha type (617973) (AD);Thalassemias, alpha- (604…	0.00277008	0.000313459	0	0	0	5.22685e-05	7.2755e-05	0	0.00277008	0.000313459	0	5.03893e-05	3.76825e-05	7.22327e-05	9.59474e-05	5.97711e-05	0.00277008	0.000358208	0	0.000100817	3.76825e-05	0.000114562	0.000443814	5.97711e-05	0.00277008	0.000313459	0	0	0	5.22685e-05	7.2755e-05	0	0.00277008	0.000313459	0	5.03893e-05	3.76825e-05	7.22327e-05	9.59474e-05	5.97711e-05	0.00277008	0.000358208	0
HBA1	LOF	AD	HBA1-AD	Hereditary Erythrocytosis	Hematologic	Erythrocytosis, familial, 7 (617981) (AD);Heinz body anemias, alpha- (140700) (AD);Hemoglobin H disease, nondeletional (613978);Methemoglobinemia, alpha type (617973) (AD);Thalassemias, alpha- (604131);Erythrocytosis, familial, 7 (617981) (AD);Heinz body anemias, alpha- (140700) (AD);Hemoglobin H disease, nondeletional (613978);Methemoglobinemia, alpha type (617973) (AD);Thalassemias, alpha- (604…	0.00277008	0.000313459	0	0	0	5.22685e-05	7.2755e-05	0	0.00277008	0.000313459	0	5.03893e-05	3.76825e-05	7.22327e-05	9.59474e-05	5.97711e-05	0.00277008	0.000358208	0	0.000100817	3.76825e-05	0.000114562	0.000443814	5.97711e-05	0.00277008	0.000313459	0	0	0	5.22685e-05	7.2755e-05	0	0.00277008	0.000313459	0	5.03893e-05	3.76825e-05	7.22327e-05	9.59474e-05	5.97711e-05	0.00277008	0.000358208	0
ABCB4	LOF	AD	ABCB4-AD	Severe Paediatric Disorders	Severe Paediatric Disorders	Cholestasis, intrahepatic, of pregnancy, 3 (614972) (AD, AR);Cholestasis, progressive familial intrahepatic 3 (602347) (AR);Gallbladder disease 1 (600803) (AD, AR)	0.00277008	0.00183384	0.000537925	0.000453809	0.000302318	0.00101998	0.00190048	0.000538333	0.00794731	0.00223588	0.00114988	0.00100785	0.000676543	0.00159932	0.00271106	0.00149906	0.010398	0.00378067	0.00298828	0.00195083	0.00569113	0.00488158	0.0046206	0.00458457	0.00277008	0.00183384	0.000537925	0.000453809	0.000302318	0.00101998	0.00190048	0.000538333	0.00794731	0.00223588	0.00114988	0.00100785	0.000676543	0.00159932	0.00271106	0.00149906	0.010398	0.00378067	0.00298828
ABCB4	LOF	AD	ABCB4-AD	Undiagnosed metabolic disorders	Metabolic	Cholestasis, intrahepatic, of pregnancy, 3 (614972) (AD, AR);Cholestasis, progressive familial intrahepatic 3 (602347) (AR);Gallbladder disease 1 (600803) (AD, AR)	0.00277008	0.00183384	0.000537925	0.000453809	0.000302318	0.00101998	0.00190048	0.000538333	0.00794731	0.00223588	0.00114988	0.00100785	0.000676543	0.00159932	0.00271106	0.00149906	0.010398	0.00378067	0.00298828	0.00195083	0.00569113	0.00488158	0.0046206	0.00458457	0.00277008	0.00183384	0.000537925	0.000453809	0.000302318	0.00101998	0.00190048	0.000538333	0.00794731	0.00223588	0.00114988	0.00100785	0.000676543	0.00159932	0.00271106	0.00149906	0.010398	0.00378067	0.00298828
ABCB4	LOF	AD	ABCB4-AD	Neonatal cholestasis	Gastrointestinal	Cholestasis, intrahepatic, of pregnancy, 3 (614972) (AD, AR);Cholestasis, progressive familial intrahepatic 3 (602347) (AR);Gallbladder disease 1 (600803) (AD, AR)	0.00277008	0.00183384	0.000537925	0.000453809	0.000302318	0.00101998	0.00190048	0.000538333	0.00794731	0.00223588	0.00114988	0.00100785	0.000676543	0.00159932	0.00271106	0.00149906	0.010398	0.00378067	0.00298828	0.00195083	0.00569113	0.00488158	0.0046206	0.00458457	0.00277008	0.00183384	0.000537925	0.000453809	0.000302318	0.00101998	0.00190048	0.000538333	0.00794731	0.00223588	0.00114988	0.00100785	0.000676543	0.00159932	0.00271106	0.00149906	0.010398	0.00378067	0.00298828
TSHR	Both	AD	TSHR-AD	DDG2P	Congenital/Developmental	Hyperthyroidism, familial gestational (603373) (AD);Hyperthyroidism, nonautoimmune (609152) (AD);Hypothyroidism, congenital, nongoitrous, 1 (275200) (AR);Thyroid adenoma, hyperfunctioning, somatic (609152);Thyroid carcinoma with thyrotoxicosis, somatic (609152)	0.00277008	0.000938688	0	0.00622739	3.74385e-05	0.00149531	0.000301378	0.000238963	0.0031158	0.00151933	0.00313296	0.00782833	0.000112311	0.00229063	0.00129766	0.00101508	0.00656661	0.00410574	0.00381966	0.0138578	0.000749876	0.00488984	0.00444194	0.0030424	0.00277008	0.000938688	0	0.00622739	3.74385e-05	0.00149531	0.000301378	0.000238963	0.0031158	0.00151933	0.00313296	0.00782833	0.000112311	0.00229063	0.00129766	0.00101508	0.00656661	0.00410574	0.00381966
TSHR	Both	AD	TSHR-AD	Severe Paediatric Disorders	Severe Paediatric Disorders	Hyperthyroidism, familial gestational (603373) (AD);Hyperthyroidism, nonautoimmune (609152) (AD);Hypothyroidism, congenital, nongoitrous, 1 (275200) (AR);Thyroid adenoma, hyperfunctioning, somatic (609152);Thyroid carcinoma with thyrotoxicosis, somatic (609152)	0.00277008	0.000938688	0	0.00622739	3.74385e-05	0.00149531	0.000301378	0.000238963	0.0031158	0.00151933	0.00313296	0.00782833	0.000112311	0.00229063	0.00129766	0.00101508	0.00656661	0.00410574	0.00381966	0.0138578	0.000749876	0.00488984	0.00444194	0.0030424	0.00277008	0.000938688	0	0.00622739	3.74385e-05	0.00149531	0.000301378	0.000238963	0.0031158	0.00151933	0.00313296	0.00782833	0.000112311	0.00229063	0.00129766	0.00101508	0.00656661	0.00410574	0.00381966
TSHR	Both	AD	TSHR-AD	Hyperthyroidism	Endocrine	Hyperthyroidism, familial gestational (603373) (AD);Hyperthyroidism, nonautoimmune (609152) (AD);Hypothyroidism, congenital, nongoitrous, 1 (275200) (AR);Thyroid adenoma, hyperfunctioning, somatic (609152);Thyroid carcinoma with thyrotoxicosis, somatic (609152)	0.00277008	0.000938688	0	0.00622739	3.74385e-05	0.00149531	0.000301378	0.000238963	0.0031158	0.00151933	0.00313296	0.00782833	0.000112311	0.00229063	0.00129766	0.00101508	0.00656661	0.00410574	0.00381966	0.0138578	0.000749876	0.00488984	0.00444194	0.0030424	0.00277008	0.000938688	0	0.00622739	3.74385e-05	0.00149531	0.000301378	0.000238963	0.0031158	0.00151933	0.00313296	0.00782833	0.000112311	0.00229063	0.00129766	0.00101508	0.00656661	0.00410574	0.00381966
MYO6	LOF	AD	MYO6-AD	Severe Paediatric Disorders	Severe Paediatric Disorders	Deafness, autosomal dominant 22 (606346) (AD);Deafness, autosomal dominant 22, with hypertrophic cardiomyopathy (606346) (AD);Deafness, autosomal recessive 37 (607821) (AR)	0.00269075	0.00177435	0.00488846	0.00361299	0.00261255	0.00901011	0.00333745	0.00809326	0.00350996	0.00257967	0.0051983	0.00381431	0.0029952	0.00941324	0.00396246	0.00856911	0.0052417	0.00374069	0.0051983	0.00396526	0.00310754	0.0103022	0.0104002	0.00952138	0.00269075	0.00177435	0.00488846	0.00361299	0.00261255	0.00901011	0.00333745	0.00809326	0.00350996	0.00257967	0.0051983	0.00381431	0.0029952	0.00941324	0.00396246	0.00856911	0.0052417	0.00374069	0.0051983
MYO6	LOF	AD	MYO6-AD	Monogenic hearing loss	Ear	Deafness, autosomal dominant 22 (606346) (AD);Deafness, autosomal dominant 22, with hypertrophic cardiomyopathy (606346) (AD);Deafness, autosomal recessive 37 (607821) (AR)	0.00269075	0.00177435	0.00488846	0.00361299	0.00261255	0.00901011	0.00333745	0.00809326	0.00350996	0.00257967	0.0051983	0.00381431	0.0029952	0.00941324	0.00396246	0.00856911	0.0052417	0.00374069	0.0051983	0.00396526	0.00310754	0.0103022	0.0104002	0.00952138	0.00269075	0.00177435	0.00488846	0.00361299	0.00261255	0.00901011	0.00333745	0.00809326	0.00350996	0.00257967	0.0051983	0.00381431	0.0029952	0.00941324	0.00396246	0.00856911	0.0052417	0.00374069	0.0051983
NR2E3	LOF	AD	NR2E3-AD	Retinal disorders	Eye	Enhanced S-cone syndrome (268100) (AR);Retinitis pigmentosa 37 (611131) (AD, AR)	0.00261158	0.00192689	0.0119837	0.000587904	0.000198227	0.00287167	0.00129379	0.001354	0.00296172	0.00255298	0.0125964	0.000903248	0.000275177	0.0038962	0.00242455	0.00178263	0.0036529	0.00259765	0.012672	0.00147026	0.000915657	0.00432842	0.00317782	0.00285739	0.00261158	0.00192689	0.0119837	0.000587904	0.000198227	0.00287167	0.00129379	0.001354	0.00296172	0.00255298	0.0125964	0.000903248	0.000275177	0.0038962	0.00242455	0.00178263	0.0036529	0.00259765	0.012672
PALB2	LOF	AD	PALB2-AD	Severe Paediatric Disorders	Severe Paediatric Disorders	{Breast-ovarian cancer, familial, susceptibility to, 5} (620442) (AD);{Pancreatic cancer, susceptibility to, 3} (613348) (AD);Fanconi anemia, complementation group N (610832)	0.00243911	0.00152232	0.000306462	0.000554844	0.00351327	0.00168392	0.00104332	0.00143571	0.00313102	0.00187955	0.000459461	0.00126007	0.00362522	0.00186717	0.00127633	0.00155509	0.00313102	0.00187955	0.000459461	0.00126007	0.00362522	0.00187435	0.00127633	0.00155509	0.00243911	0.00152232	0.000306462	0.000554844	0.00351327	0.00168392	0.00104332	0.00143571	0.00313102	0.00187955	0.000459461	0.00126007	0.00362522	0.00186717	0.00127633	0.00155509	0.00313102	0.00187955	0.000459461
PALB2	LOF	AD	PALB2-AD	Familial breast cancer	Neoplasm	{Breast-ovarian cancer, familial, susceptibility to, 5} (620442) (AD);{Pancreatic cancer, susceptibility to, 3} (613348) (AD);Fanconi anemia, complementation group N (610832)	0.00243911	0.00152232	0.000306462	0.000554844	0.00351327	0.00168392	0.00104332	0.00143571	0.00313102	0.00187955	0.000459461	0.00126007	0.00362522	0.00186717	0.00127633	0.00155509	0.00313102	0.00187955	0.000459461	0.00126007	0.00362522	0.00187435	0.00127633	0.00155509	0.00243911	0.00152232	0.000306462	0.000554844	0.00351327	0.00168392	0.00104332	0.00143571	0.00313102	0.00187955	0.000459461	0.00126007	0.00362522	0.00186717	0.00127633	0.00155509	0.00313102	0.00187955	0.000459461
RPGRIP1	LOF	AD	RPGRIP1-AD	Severe Paediatric Disorders	Severe Paediatric Disorders	Cone-rod dystrophy 13 (608194) (AR);Leber congenital amaurosis 6 (613826) (AR)	0.00242748	0.00179919	0.000306786	0.00217595	0.000714291	0.000905269	0.000584996	0.00109854	0.00502594	0.00242612	0.00138975	0.0028837	0.000751728	0.0013931	0.00131868	0.00201216	0.00502594	0.00247169	0.00138975	0.0030848	0.000827064	0.00145489	0.00377818	0.00207227	0.00242748	0.00179919	0.000306786	0.00217595	0.000714291	0.000905269	0.000584996	0.00109854	0.00502594	0.00242612	0.00138975	0.0028837	0.000751728	0.0013931	0.00131868	0.00201216	0.00502594	0.00247169	0.00138975
MFN2	LOF	AD	MFN2-AD	DDG2P	Congenital/Developmental	Charcot-Marie-Tooth disease, axonal, type 2A2A (609260) (AD);Charcot-Marie-Tooth disease, axonal, type 2A2B (617087) (AR);Hereditary motor and sensory neuropathy VIA (601152) (AD);Lipomatosis, multiple symmetric, with or without peripheral neuropathy (151800) (AR)	0.00209643	0.000625886	0.000611995	0.000201496	0.000187199	0.00153659	0.000417288	0.000238927	0.00316329	0.00134096	0.00099436	0.000705079	0.000674051	0.0030224	0.00245494	0.00155206	0.00489	0.00423967	0.00633128	0.00151027	0.00134745	0.00454007	0.00668105	0.00381724	0.00209643	0.000625886	0.000611995	0.000201496	0.000187199	0.00153659	0.000417288	0.000238927	0.00316329	0.00134096	0.00099436	0.000705079	0.000674051	0.0030224	0.00245494	0.00155206	0.00489	0.00423967	0.00633128
MFN2	LOF	AD	MFN2-AD	Severe Paediatric Disorders	Severe Paediatric Disorders	Charcot-Marie-Tooth disease, axonal, type 2A2A (609260) (AD);Charcot-Marie-Tooth disease, axonal, type 2A2B (617087) (AR);Hereditary motor and sensory neuropathy VIA (601152) (AD);Lipomatosis, multiple symmetric, with or without peripheral neuropathy (151800) (AR)	0.00209643	0.000625886	0.000611995	0.000201496	0.000187199	0.00153659	0.000417288	0.000238927	0.00316329	0.00134096	0.00099436	0.000705079	0.000674051	0.0030224	0.00245494	0.00155206	0.00489	0.00423967	0.00633128	0.00151027	0.00134745	0.00454007	0.00668105	0.00381724	0.00209643	0.000625886	0.000611995	0.000201496	0.000187199	0.00153659	0.000417288	0.000238927	0.00316329	0.00134096	0.00099436	0.000705079	0.000674051	0.0030224	0.00245494	0.00155206	0.00489	0.00423967	0.00633128
MFN2	LOF	AD	MFN2-AD	Hereditary ataxia with onset in adulthood	Neurological	Charcot-Marie-Tooth disease, axonal, type 2A2A (609260) (AD);Charcot-Marie-Tooth disease, axonal, type 2A2B (617087) (AR);Hereditary motor and sensory neuropathy VIA (601152) (AD);Lipomatosis, multiple symmetric, with or without peripheral neuropathy (151800) (AR)	0.00209643	0.000625886	0.000611995	0.000201496	0.000187199	0.00153659	0.000417288	0.000238927	0.00316329	0.00134096	0.00099436	0.000705079	0.000674051	0.0030224	0.00245494	0.00155206	0.00489	0.00423967	0.00633128	0.00151027	0.00134745	0.00454007	0.00668105	0.00381724	0.00209643	0.000625886	0.000611995	0.000201496	0.000187199	0.00153659	0.000417288	0.000238927	0.00316329	0.00134096	0.00099436	0.000705079	0.000674051	0.0030224	0.00245494	0.00155206	0.00489	0.00423967	0.00633128
MFN2	LOF	AD	MFN2-AD	Mitochondrial DNA maintenance disorder	Mitochrondrial	Charcot-Marie-Tooth disease, axonal, type 2A2A (609260) (AD);Charcot-Marie-Tooth disease, axonal, type 2A2B (617087) (AR);Hereditary motor and sensory neuropathy VIA (601152) (AD);Lipomatosis, multiple symmetric, with or without peripheral neuropathy (151800) (AR)	0.00209643	0.000625886	0.000611995	0.000201496	0.000187199	0.00153659	0.000417288	0.000238927	0.00316329	0.00134096	0.00099436	0.000705079	0.000674051	0.0030224	0.00245494	0.00155206	0.00489	0.00423967	0.00633128	0.00151027	0.00134745	0.00454007	0.00668105	0.00381724	0.00209643	0.000625886	0.000611995	0.000201496	0.000187199	0.00153659	0.000417288	0.000238927	0.00316329	0.00134096	0.00099436	0.000705079	0.000674051	0.0030224	0.00245494	0.00155206	0.00489	0.00423967	0.00633128
MFN2	LOF	AD	MFN2-AD	Undiagnosed metabolic disorders	Metabolic	Charcot-Marie-Tooth disease, axonal, type 2A2A (609260) (AD);Charcot-Marie-Tooth disease, axonal, type 2A2B (617087) (AR);Hereditary motor and sensory neuropathy VIA (601152) (AD);Lipomatosis, multiple symmetric, with or without peripheral neuropathy (151800) (AR)	0.00209643	0.000625886	0.000611995	0.000201496	0.000187199	0.00153659	0.000417288	0.000238927	0.00316329	0.00134096	0.00099436	0.000705079	0.000674051	0.0030224	0.00245494	0.00155206	0.00489	0.00423967	0.00633128	0.00151027	0.00134745	0.00454007	0.00668105	0.00381724	0.00209643	0.000625886	0.000611995	0.000201496	0.000187199	0.00153659	0.000417288	0.000238927	0.00316329	0.00134096	0.00099436	0.000705079	0.000674051	0.0030224	0.00245494	0.00155206	0.00489	0.00423967	0.00633128
MFN2	LOF	AD	MFN2-AD	Optic neuropathy	Eye	Charcot-Marie-Tooth disease, axonal, type 2A2A (609260) (AD);Charcot-Marie-Tooth disease, axonal, type 2A2B (617087) (AR);Hereditary motor and sensory neuropathy VIA (601152) (AD);Lipomatosis, multiple symmetric, with or without peripheral neuropathy (151800) (AR)	0.00209643	0.000625886	0.000611995	0.000201496	0.000187199	0.00153659	0.000417288	0.000238927	0.00316329	0.00134096	0.00099436	0.000705079	0.000674051	0.0030224	0.00245494	0.00155206	0.00489	0.00423967	0.00633128	0.00151027	0.00134745	0.00454007	0.00668105	0.00381724	0.00209643	0.000625886	0.000611995	0.000201496	0.000187199	0.00153659	0.000417288	0.000238927	0.00316329	0.00134096	0.00099436	0.000705079	0.000674051	0.0030224	0.00245494	0.00155206	0.00489	0.00423967	0.00633128
LZTR1	LOF	AD	LZTR1-AD	Fetal hydrops	Congenital/Developmental	{Schwannomatosis-2, susceptibility to} (615670) (AD);Noonan syndrome 10 (616564) (AD);Noonan syndrome 2 (605275) (AR)	0.00208738	0.00180133	0.00069965	0.00199228	0.00376051	0.00170981	0.00191372	0.00282171	0.00312561	0.00259389	0.00108354	0.00290605	0.00444493	0.00237215	0.00285519	0.00407668	0.0034712	0.00278222	0.00154929	0.00363944	0.00509962	0.0026266	0.00349622	0.00419566	0.00208738	0.00180133	0.00069965	0.00199228	0.00376051	0.00170981	0.00191372	0.00282171	0.00312561	0.00259389	0.00108354	0.00290605	0.00444493	0.00237215	0.00285519	0.00407668	0.0034712	0.00278222	0.00154929
LZTR1	LOF	AD	LZTR1-AD	Severe Paediatric Disorders	Severe Paediatric Disorders	{Schwannomatosis-2, susceptibility to} (615670) (AD);Noonan syndrome 10 (616564) (AD);Noonan syndrome 2 (605275) (AR)	0.00208738	0.00180133	0.00069965	0.00199228	0.00376051	0.00170981	0.00191372	0.00282171	0.00312561	0.00259389	0.00108354	0.00290605	0.00444493	0.00237215	0.00285519	0.00407668	0.0034712	0.00278222	0.00154929	0.00363944	0.00509962	0.0026266	0.00349622	0.00419566	0.00208738	0.00180133	0.00069965	0.00199228	0.00376051	0.00170981	0.00191372	0.00282171	0.00312561	0.00259389	0.00108354	0.00290605	0.00444493	0.00237215	0.00285519	0.00407668	0.0034712	0.00278222	0.00154929
LZTR1	LOF	AD	LZTR1-AD	Intellectual disability - microarray and sequencing	Neurological	{Schwannomatosis-2, susceptibility to} (615670) (AD);Noonan syndrome 10 (616564) (AD);Noonan syndrome 2 (605275) (AR)	0.00208738	0.00180133	0.00069965	0.00199228	0.00376051	0.00170981	0.00191372	0.00282171	0.00312561	0.00259389	0.00108354	0.00290605	0.00444493	0.00237215	0.00285519	0.00407668	0.0034712	0.00278222	0.00154929	0.00363944	0.00509962	0.0026266	0.00349622	0.00419566	0.00208738	0.00180133	0.00069965	0.00199228	0.00376051	0.00170981	0.00191372	0.00282171	0.00312561	0.00259389	0.00108354	0.00290605	0.00444493	0.00237215	0.00285519	0.00407668	0.0034712	0.00278222	0.00154929
LZTR1	LOF	AD	LZTR1-AD	Primary lymphoedema	Cardiovascular	{Schwannomatosis-2, susceptibility to} (615670) (AD);Noonan syndrome 10 (616564) (AD);Noonan syndrome 2 (605275) (AR)	0.00208738	0.00180133	0.00069965	0.00199228	0.00376051	0.00170981	0.00191372	0.00282171	0.00312561	0.00259389	0.00108354	0.00290605	0.00444493	0.00237215	0.00285519	0.00407668	0.0034712	0.00278222	0.00154929	0.00363944	0.00509962	0.0026266	0.00349622	0.00419566	0.00208738	0.00180133	0.00069965	0.00199228	0.00376051	0.00170981	0.00191372	0.00282171	0.00312561	0.00259389	0.00108354	0.00290605	0.00444493	0.00237215	0.00285519	0.00407668	0.0034712	0.00278222	0.00154929
LZTR1	LOF	AD	LZTR1-AD	Familial Tumours Syndromes of the central & peripheral Nervous system	Neoplasm	{Schwannomatosis-2, susceptibility to} (615670) (AD);Noonan syndrome 10 (616564) (AD);Noonan syndrome 2 (605275) (AR)	0.00208738	0.00180133	0.00069965	0.00199228	0.00376051	0.00170981	0.00191372	0.00282171	0.00312561	0.00259389	0.00108354	0.00290605	0.00444493	0.00237215	0.00285519	0.00407668	0.0034712	0.00278222	0.00154929	0.00363944	0.00509962	0.0026266	0.00349622	0.00419566	0.00208738	0.00180133	0.00069965	0.00199228	0.00376051	0.00170981	0.00191372	0.00282171	0.00312561	0.00259389	0.00108354	0.00290605	0.00444493	0.00237215	0.00285519	0.00407668	0.0034712	0.00278222	0.00154929
LZTR1	LOF	AD	LZTR1-AD	Pigmentary skin disorders	Skin	{Schwannomatosis-2, susceptibility to} (615670) (AD);Noonan syndrome 10 (616564) (AD);Noonan syndrome 2 (605275) (AR)	0.00208738	0.00180133	0.00069965	0.00199228	0.00376051	0.00170981	0.00191372	0.00282171	0.00312561	0.00259389	0.00108354	0.00290605	0.00444493	0.00237215	0.00285519	0.00407668	0.0034712	0.00278222	0.00154929	0.00363944	0.00509962	0.0026266	0.00349622	0.00419566	0.00208738	0.00180133	0.00069965	0.00199228	0.00376051	0.00170981	0.00191372	0.00282171	0.00312561	0.00259389	0.00108354	0.00290605	0.00444493	0.00237215	0.00285519	0.00407668	0.0034712	0.00278222	0.00154929
SLC5A2	LOF	AD	SLC5A2-AD	Severe Paediatric Disorders	Severe Paediatric Disorders	Renal glucosuria (233100) (AD, AR)	0.00208105	0.000898935	0.00199584	0.00015114	0.000156183	0.00121993	0.00165068	0.000418098	0.00312571	0.00210564	0.00207222	0.000755524	0.00105562	0.00226706	0.00278552	0.00173151	0.00695705	0.00366759	0.00314376	0.00301936	0.00148386	0.00362862	0.00532761	0.00292403	0.00208105	0.000898935	0.00199584	0.00015114	0.000156183	0.00121993	0.00165068	0.000418098	0.00312571	0.00210564	0.00207222	0.000755524	0.00105562	0.00226706	0.00278552	0.00173151	0.00695705	0.00366759	0.00314376
SLC5A2	LOF	AD	SLC5A2-AD	Renal tubulopathies	Kidney/Urinary System	Renal glucosuria (233100) (AD, AR)	0.00208105	0.000898935	0.00199584	0.00015114	0.000156183	0.00121993	0.00165068	0.000418098	0.00312571	0.00210564	0.00207222	0.000755524	0.00105562	0.00226706	0.00278552	0.00173151	0.00695705	0.00366759	0.00314376	0.00301936	0.00148386	0.00362862	0.00532761	0.00292403	0.00208105	0.000898935	0.00199584	0.00015114	0.000156183	0.00121993	0.00165068	0.000418098	0.00312571	0.00210564	0.00207222	0.000755524	0.00105562	0.00226706	0.00278552	0.00173151	0.00695705	0.00366759	0.00314376
TNFRSF13B	LOF	AD	TNFRSF13B-AD	Severe Paediatric Disorders	Severe Paediatric Disorders	Immunodeficiency, common variable, 2 (240500) (AD, AR);Immunoglobulin A deficiency 2 (609529)	0.00207996	0.00174257	0.009975	0.000251949	0.000262158	0.00161739	0.000347763	0.000298641	0.00277176	0.00317022	0.0144976	0.00286768	0.000563265	0.00321463	0.00129844	0.000657129	0.00863645	0.0142079	0.021934	0.00502552	0.052214	0.0288433	0.0019929	0.00447058	0.00207996	0.00174257	0.009975	0.000251949	0.000262158	0.00161739	0.000347763	0.000298641	0.00277176	0.00317022	0.0144976	0.00286768	0.000563265	0.00321463	0.00129844	0.000657129	0.00863645	0.0142079	0.021934
TNFRSF13B	LOF	AD	TNFRSF13B-AD	COVID-19 research	Immune System/Infectious	Immunodeficiency, common variable, 2 (240500) (AD, AR);Immunoglobulin A deficiency 2 (609529)	0.00207996	0.00174257	0.009975	0.000251949	0.000262158	0.00161739	0.000347763	0.000298641	0.00277176	0.00317022	0.0144976	0.00286768	0.000563265	0.00321463	0.00129844	0.000657129	0.00863645	0.0142079	0.021934	0.00502552	0.052214	0.0288433	0.0019929	0.00447058	0.00207996	0.00174257	0.009975	0.000251949	0.000262158	0.00161739	0.000347763	0.000298641	0.00277176	0.00317022	0.0144976	0.00286768	0.000563265	0.00321463	0.00129844	0.000657129	0.00863645	0.0142079	0.021934
SLC34A1	LOF	AD	SLC34A1-AD	Skeletal dysplasia	Skeletal/Connective Tissue	?Fanconi renotubular syndrome 2 (613388) (AR);Hypercalcemia, infantile, 2 (616963) (AR);Nephrolithiasis/osteoporosis, hypophosphatemic, 1 (612286) (AD)	0.00207924	0.000223651	0	0.000654761	0.000113423	0.00045528	0.00030149	0.00047794	0.00380783	0.00107309	0.000306044	0.000856166	0.000230751	0.00201852	0.00289496	0.00161209	0.00415319	0.00165365	0.00137656	0.00166135	0.000343128	0.00283503	0.00344973	0.00226797	0.00207924	0.000223651	0	0.000654761	0.000113423	0.00045528	0.00030149	0.00047794	0.00380783	0.00107309	0.000306044	0.000856166	0.000230751	0.00201852	0.00289496	0.00161209	0.00415319	0.00165365	0.00137656
SLC34A1	LOF	AD	SLC34A1-AD	Hypophosphataemia or rickets	Metabolic	?Fanconi renotubular syndrome 2 (613388) (AR);Hypercalcemia, infantile, 2 (616963) (AR);Nephrolithiasis/osteoporosis, hypophosphatemic, 1 (612286) (AD)	0.00207924	0.000223651	0	0.000654761	0.000113423	0.00045528	0.00030149	0.00047794	0.00380783	0.00107309	0.000306044	0.000856166	0.000230751	0.00201852	0.00289496	0.00161209	0.00415319	0.00165365	0.00137656	0.00166135	0.000343128	0.00283503	0.00344973	0.00226797	0.00207924	0.000223651	0	0.000654761	0.000113423	0.00045528	0.00030149	0.00047794	0.00380783	0.00107309	0.000306044	0.000856166	0.000230751	0.00201852	0.00289496	0.00161209	0.00415319	0.00165365	0.00137656
SLC34A1	LOF	AD	SLC34A1-AD	Nephrocalcinosis or nephrolithiasis	Kidney/Urinary System	?Fanconi renotubular syndrome 2 (613388) (AR);Hypercalcemia, infantile, 2 (616963) (AR);Nephrolithiasis/osteoporosis, hypophosphatemic, 1 (612286) (AD)	0.00207924	0.000223651	0	0.000654761	0.000113423	0.00045528	0.00030149	0.00047794	0.00380783	0.00107309	0.000306044	0.000856166	0.000230751	0.00201852	0.00289496	0.00161209	0.00415319	0.00165365	0.00137656	0.00166135	0.000343128	0.00283503	0.00344973	0.00226797	0.00207924	0.000223651	0	0.000654761	0.000113423	0.00045528	0.00030149	0.00047794	0.00380783	0.00107309	0.000306044	0.000856166	0.000230751	0.00201852	0.00289496	0.00161209	0.00415319	0.00165365	0.00137656
SLC7A9	LOF	AD	SLC7A9-AD	Severe Paediatric Disorders	Severe Paediatric Disorders	Cystinuria (220100) (AD, AR);Cystinuria (220100) (AD, AR)	0.00207876	0.000536483	0.000229589	0.000453331	0	0.00391204	0.00044051	0.000776471	0.00242472	0.00187644	0.000688573	0.00211378	0.00130991	0.00590255	0.00162193	0.00173113	0.00854375	0.00481838	0.0147364	0.00296805	0.00273003	0.018406	0.00307961	0.00524393	0.00207876	0.000536483	0.000229589	0.000453331	0	0.00391204	0.00044051	0.000776471	0.00242472	0.00187644	0.000688573	0.00211378	0.00130991	0.00590255	0.00162193	0.00173113	0.00854375	0.00481838	0.0147364
SLC7A9	LOF	AD	SLC7A9-AD	Undiagnosed metabolic disorders	Metabolic	Cystinuria (220100) (AD, AR);Cystinuria (220100) (AD, AR)	0.00207876	0.000536483	0.000229589	0.000453331	0	0.00391204	0.00044051	0.000776471	0.00242472	0.00187644	0.000688573	0.00211378	0.00130991	0.00590255	0.00162193	0.00173113	0.00854375	0.00481838	0.0147364	0.00296805	0.00273003	0.018406	0.00307961	0.00524393	0.00207876	0.000536483	0.000229589	0.000453331	0	0.00391204	0.00044051	0.000776471	0.00242472	0.00187644	0.000688573	0.00211378	0.00130991	0.00590255	0.00162193	0.00173113	0.00854375	0.00481838	0.0147364
SLC7A9	LOF	AD	SLC7A9-AD	Nephrocalcinosis or nephrolithiasis	Kidney/Urinary System	Cystinuria (220100) (AD, AR);Cystinuria (220100) (AD, AR)	0.00207876	0.000536483	0.000229589	0.000453331	0	0.00391204	0.00044051	0.000776471	0.00242472	0.00187644	0.000688573	0.00211378	0.00130991	0.00590255	0.00162193	0.00173113	0.00854375	0.00481838	0.0147364	0.00296805	0.00273003	0.018406	0.00307961	0.00524393	0.00207876	0.000536483	0.000229589	0.000453331	0	0.00391204	0.00044051	0.000776471	0.00242472	0.00187644	0.000688573	0.00211378	0.00130991	0.00590255	0.00162193	0.00173113	0.00854375	0.00481838	0.0147364
EPCAM	LOF	AD	EPCAM-AD	Adult solid tumours for rare disease	Neoplasm	Diarrhea 5, with tufting enteropathy, congenital (613217) (AR);Lynch syndrome 8 (613244) (AD)	0.00185647	0.00081399	0.000343909	0.000210738	3.74904e-05	0.000333232	0.000420872	0.000201365	0.00297122	0.000862904	0.000343909	0.00071646	3.74904e-05	0.00050987	0.000560176	0.000500976	0.00297122	0.000862904	0.000343909	0.000818498	0.0021712	0.000681448	0.000881944	0.000500976	0.00185647	0.00081399	0.000343909	0.000210738	3.74904e-05	0.000333232	0.000420872	0.000201365	0.00297122	0.000862904	0.000343909	0.00071646	3.74904e-05	0.00050987	0.000560176	0.000500976	0.00297122	0.000862904	0.000343909
CDK13	LOF	AD	CDK13-AD	Fetal anomalies	Congenital/Developmental	Congenital heart defects, dysmorphic facial features, and intellectual developmental disorder (617360) (AD)	0.00178451	0.00575749	0.00100253	0.000151035	7.49907e-05	0.000230496	0.000801289	0.00145654	0.00213262	0.00599661	0.00152619	0.000311513	0.000475728	0.000385826	0.00123205	0.00151619	0.00248025	0.00613025	0.00152619	0.000419697	0.000514959	0.000415063	0.00123205	0.00174239	0.00178451	0.00575749	0.00100253	0.000151035	7.49907e-05	0.000230496	0.000801289	0.00145654	0.00213262	0.00599661	0.00152619	0.000311513	0.000475728	0.000385826	0.00123205	0.00151619	0.00248025	0.00613025	0.00152619
CDK13	LOF	AD	CDK13-AD	Rare syndromic craniosynostosis or isolated multisuture synostosis	Skeletal/Connective Tissue	Congenital heart defects, dysmorphic facial features, and intellectual developmental disorder (617360) (AD)	0.00178451	0.00575749	0.00100253	0.000151035	7.49907e-05	0.000230496	0.000801289	0.00145654	0.00213262	0.00599661	0.00152619	0.000311513	0.000475728	0.000385826	0.00123205	0.00151619	0.00248025	0.00613025	0.00152619	0.000419697	0.000514959	0.000415063	0.00123205	0.00174239	0.00178451	0.00575749	0.00100253	0.000151035	7.49907e-05	0.000230496	0.000801289	0.00145654	0.00213262	0.00599661	0.00152619	0.000311513	0.000475728	0.000385826	0.00123205	0.00151619	0.00248025	0.00613025	0.00152619
CDK13	LOF	AD	CDK13-AD	Severe Paediatric Disorders	Severe Paediatric Disorders	Congenital heart defects, dysmorphic facial features, and intellectual developmental disorder (617360) (AD)	0.00178451	0.00575749	0.00100253	0.000151035	7.49907e-05	0.000230496	0.000801289	0.00145654	0.00213262	0.00599661	0.00152619	0.000311513	0.000475728	0.000385826	0.00123205	0.00151619	0.00248025	0.00613025	0.00152619	0.000419697	0.000514959	0.000415063	0.00123205	0.00174239	0.00178451	0.00575749	0.00100253	0.000151035	7.49907e-05	0.000230496	0.000801289	0.00145654	0.00213262	0.00599661	0.00152619	0.000311513	0.000475728	0.000385826	0.00123205	0.00151619	0.00248025	0.00613025	0.00152619
CDK13	LOF	AD	CDK13-AD	Malformations of cortical development	Neurological	Congenital heart defects, dysmorphic facial features, and intellectual developmental disorder (617360) (AD)	0.00178451	0.00575749	0.00100253	0.000151035	7.49907e-05	0.000230496	0.000801289	0.00145654	0.00213262	0.00599661	0.00152619	0.000311513	0.000475728	0.000385826	0.00123205	0.00151619	0.00248025	0.00613025	0.00152619	0.000419697	0.000514959	0.000415063	0.00123205	0.00174239	0.00178451	0.00575749	0.00100253	0.000151035	7.49907e-05	0.000230496	0.000801289	0.00145654	0.00213262	0.00599661	0.00152619	0.000311513	0.000475728	0.000385826	0.00123205	0.00151619	0.00248025	0.00613025	0.00152619
NLRP12	LOF	AD	NLRP12-AD	Severe Paediatric Disorders	Severe Paediatric Disorders	Familial cold autoinflammatory syndrome 2 (611762) (AD)	0.00177598	0.000536481	0	0.000352583	0	0.000167527	0.00067261	0.00351835	0.00764307	0.00241192	0	0.00397215	0.000263207	0.00300478	0.00331067	0.0076766	0.00764307	0.00339319	0	0.00397215	0.000263207	0.00306216	0.00702431	0.0135872	0.00177598	0.000536481	0	0.000352583	0	0.000167527	0.00067261	0.00351835	0.00764307	0.00241192	0	0.00397215	0.000263207	0.00300478	0.00331067	0.0076766	0.00764307	0.00339319	0
NLRP12	LOF	AD	NLRP12-AD	Periodic fever syndromes	Rheumatic	Familial cold autoinflammatory syndrome 2 (611762) (AD)	0.00177598	0.000536481	0	0.000352583	0	0.000167527	0.00067261	0.00351835	0.00764307	0.00241192	0	0.00397215	0.000263207	0.00300478	0.00331067	0.0076766	0.00764307	0.00339319	0	0.00397215	0.000263207	0.00306216	0.00702431	0.0135872	0.00177598	0.000536481	0	0.000352583	0	0.000167527	0.00067261	0.00351835	0.00764307	0.00241192	0	0.00397215	0.000263207	0.00300478	0.00331067	0.0076766	0.00764307	0.00339319	0
NLRP12	LOF	AD	NLRP12-AD	COVID-19 research	Immune System/Infectious	Familial cold autoinflammatory syndrome 2 (611762) (AD)	0.00177598	0.000536481	0	0.000352583	0	0.000167527	0.00067261	0.00351835	0.00764307	0.00241192	0	0.00397215	0.000263207	0.00300478	0.00331067	0.0076766	0.00764307	0.00339319	0	0.00397215	0.000263207	0.00306216	0.00702431	0.0135872	0.00177598	0.000536481	0	0.000352583	0	0.000167527	0.00067261	0.00351835	0.00764307	0.00241192	0	0.00397215	0.000263207	0.00300478	0.00331067	0.0076766	0.00764307	0.00339319	0
CYP11B1	LOF	AD	CYP11B1-AD	Severe Paediatric Disorders	Severe Paediatric Disorders	Adrenal hyperplasia, congenital, due to 11-beta-hydroxylase deficiency (202010) (AR);Aldosteronism, glucocorticoid-remediable (103900) (AD)	0.00174057	0.000760937	0	0.000202004	0.000187209	0.00118104	0.000718932	0.00465956	0.00208664	0.00107372	0.000153069	0.000453889	0.000262087	0.00259389	0.00169223	0.00537283	0.00277843	0.00125241	0.000153069	0.000806324	0.000411822	0.002793	0.00543833	0.00584807	0.00174057	0.000760937	0	0.000202004	0.000187209	0.00118104	0.000718932	0.00465956	0.00208664	0.00107372	0.000153069	0.000453889	0.000262087	0.00259389	0.00169223	0.00537283	0.00277843	0.00125241	0.000153069
CYP11B1	LOF	AD	CYP11B1-AD	Extreme early-onset hypertension	Cardiovascular	Adrenal hyperplasia, congenital, due to 11-beta-hydroxylase deficiency (202010) (AR);Aldosteronism, glucocorticoid-remediable (103900) (AD)	0.00174057	0.000760937	0	0.000202004	0.000187209	0.00118104	0.000718932	0.00465956	0.00208664	0.00107372	0.000153069	0.000453889	0.000262087	0.00259389	0.00169223	0.00537283	0.00277843	0.00125241	0.000153069	0.000806324	0.000411822	0.002793	0.00543833	0.00584807	0.00174057	0.000760937	0	0.000202004	0.000187209	0.00118104	0.000718932	0.00465956	0.00208664	0.00107372	0.000153069	0.000453889	0.000262087	0.00259389	0.00169223	0.00537283	0.00277843	0.00125241	0.000153069
DNMT3A	Both	AD	DNMT3A-AD	Beckwith-Wiedemann syndrome BWS and other congenital overgrowth disorders	Congenital/Developmental	Acute myeloid leukemia, somatic (601626);Heyn-Sproul-Jackson syndrome (618724) (AD);Tatton-Brown-Rahman syndrome (615879) (AD);Acute myeloid leukemia, somatic (601626);Heyn-Sproul-Jackson syndrome (618724) (AD);Tatton-Brown-Rahman syndrome (615879) (AD);Acute myeloid leukemia, somatic (601626);Heyn-Sproul-Jackson syndrome (618724) (AD);Tatton-Brown-Rahman syndrome (615879) (AD);Acute myeloid leuk…	0.00173521	0.00152152	0.00429199	0.001774	0.00143027	0.00210775	0.00139251	0.00257114	0.00277914	0.00293997	0.00872106	0.0034831	0.0035078	0.00430596	0.00261426	0.00550171	0.00485707	0.0037434	0.0113157	0.00399561	0.00433202	0.00529516	0.00316973	0.00645201	0.00173521	0.00152152	0.00429199	0.001774	0.00143027	0.00210775	0.00139251	0.00257114	0.00277914	0.00293997	0.00872106	0.0034831	0.0035078	0.00430596	0.00261426	0.00550171	0.00485707	0.0037434	0.0113157
DNMT3A	Both	AD	DNMT3A-AD	Skeletal dysplasia	Skeletal/Connective Tissue	Acute myeloid leukemia, somatic (601626);Heyn-Sproul-Jackson syndrome (618724) (AD);Tatton-Brown-Rahman syndrome (615879) (AD);Acute myeloid leukemia, somatic (601626);Heyn-Sproul-Jackson syndrome (618724) (AD);Tatton-Brown-Rahman syndrome (615879) (AD);Acute myeloid leukemia, somatic (601626);Heyn-Sproul-Jackson syndrome (618724) (AD);Tatton-Brown-Rahman syndrome (615879) (AD);Acute myeloid leuk…	0.00173521	0.00152152	0.00429199	0.001774	0.00143027	0.00210775	0.00139251	0.00257114	0.00277914	0.00293997	0.00872106	0.0034831	0.0035078	0.00430596	0.00261426	0.00550171	0.00485707	0.0037434	0.0113157	0.00399561	0.00433202	0.00529516	0.00316973	0.00645201	0.00173521	0.00152152	0.00429199	0.001774	0.00143027	0.00210775	0.00139251	0.00257114	0.00277914	0.00293997	0.00872106	0.0034831	0.0035078	0.00430596	0.00261426	0.00550171	0.00485707	0.0037434	0.0113157
DNMT3A	Both	AD	DNMT3A-AD	Severe Paediatric Disorders	Severe Paediatric Disorders	Acute myeloid leukemia, somatic (601626);Heyn-Sproul-Jackson syndrome (618724) (AD);Tatton-Brown-Rahman syndrome (615879) (AD);Acute myeloid leukemia, somatic (601626);Heyn-Sproul-Jackson syndrome (618724) (AD);Tatton-Brown-Rahman syndrome (615879) (AD);Acute myeloid leukemia, somatic (601626);Heyn-Sproul-Jackson syndrome (618724) (AD);Tatton-Brown-Rahman syndrome (615879) (AD);Acute myeloid leuk…	0.00173521	0.00152152	0.00429199	0.001774	0.00143027	0.00210775	0.00139251	0.00257114	0.00277914	0.00293997	0.00872106	0.0034831	0.0035078	0.00430596	0.00261426	0.00550171	0.00485707	0.0037434	0.0113157	0.00399561	0.00433202	0.00529516	0.00316973	0.00645201	0.00173521	0.00152152	0.00429199	0.001774	0.00143027	0.00210775	0.00139251	0.00257114	0.00277914	0.00293997	0.00872106	0.0034831	0.0035078	0.00430596	0.00261426	0.00550171	0.00485707	0.0037434	0.0113157
DNMT3A	Both	AD	DNMT3A-AD	Severe microcephaly	Neurological	Acute myeloid leukemia, somatic (601626);Heyn-Sproul-Jackson syndrome (618724) (AD);Tatton-Brown-Rahman syndrome (615879) (AD);Acute myeloid leukemia, somatic (601626);Heyn-Sproul-Jackson syndrome (618724) (AD);Tatton-Brown-Rahman syndrome (615879) (AD);Acute myeloid leukemia, somatic (601626);Heyn-Sproul-Jackson syndrome (618724) (AD);Tatton-Brown-Rahman syndrome (615879) (AD);Acute myeloid leuk…	0.00173521	0.00152152	0.00429199	0.001774	0.00143027	0.00210775	0.00139251	0.00257114	0.00277914	0.00293997	0.00872106	0.0034831	0.0035078	0.00430596	0.00261426	0.00550171	0.00485707	0.0037434	0.0113157	0.00399561	0.00433202	0.00529516	0.00316973	0.00645201	0.00173521	0.00152152	0.00429199	0.001774	0.00143027	0.00210775	0.00139251	0.00257114	0.00277914	0.00293997	0.00872106	0.0034831	0.0035078	0.00430596	0.00261426	0.00550171	0.00485707	0.0037434	0.0113157
MYO7A	LOF	AD	MYO7A-AD	Severe Paediatric Disorders	Severe Paediatric Disorders	Deafness, autosomal dominant 11 (601317) (AD);Deafness, autosomal recessive 2 (600060) (AR);Usher syndrome, type 1B (276900) (AR)	0.00173376	0.00237562	0.00184388	0.00164668	0.00263285	0.00507313	0.00284644	0.0024073	0.00277749	0.00416516	0.0039884	0.00434844	0.00574602	0.00902956	0.00645681	0.00487836	0.00838452	0.0121049	0.019346	0.0145117	0.00905864	0.0167733	0.0155872	0.0144936	0.00173376	0.00237562	0.00184388	0.00164668	0.00263285	0.00507313	0.00284644	0.0024073	0.00277749	0.00416516	0.0039884	0.00434844	0.00574602	0.00902956	0.00645681	0.00487836	0.00838452	0.0121049	0.019346
MYO7A	LOF	AD	MYO7A-AD	Monogenic hearing loss	Ear	Deafness, autosomal dominant 11 (601317) (AD);Deafness, autosomal recessive 2 (600060) (AR);Usher syndrome, type 1B (276900) (AR)	0.00173376	0.00237562	0.00184388	0.00164668	0.00263285	0.00507313	0.00284644	0.0024073	0.00277749	0.00416516	0.0039884	0.00434844	0.00574602	0.00902956	0.00645681	0.00487836	0.00838452	0.0121049	0.019346	0.0145117	0.00905864	0.0167733	0.0155872	0.0144936	0.00173376	0.00237562	0.00184388	0.00164668	0.00263285	0.00507313	0.00284644	0.0024073	0.00277749	0.00416516	0.0039884	0.00434844	0.00574602	0.00902956	0.00645681	0.00487836	0.00838452	0.0121049	0.019346
BRCA1	LOF	AD	BRCA1-AD	Familial breast cancer	Neoplasm	{Breast-ovarian cancer, familial, 1} (604370) (AD, Mu);{Pancreatic cancer, susceptibility to, 4} (614320);Fanconi anemia, complementation group S (617883) (AR)	0.00173256	0.00134192	0.0107399	0.00206475	0.0006371	0.00154009	0.00234069	0.00161381	0.00173256	0.00134192	0.0107399	0.00256874	0.000674525	0.00167691	0.00275772	0.0018527	0.00207888	0.00134192	0.0107399	0.00256874	0.000711941	0.00178827	0.00280403	0.0018527	0.00173256	0.00134192	0.0107399	0.00206475	0.0006371	0.00154009	0.00234069	0.00161381	0.00173256	0.00134192	0.0107399	0.00256874	0.000674525	0.00167691	0.00275772	0.0018527	0.00207888	0.00134192	0.0107399
BRCA1	LOF	AD	BRCA1-AD	Additional findings health related - adult specific	Neoplasm	{Breast-ovarian cancer, familial, 1} (604370) (AD, Mu);{Pancreatic cancer, susceptibility to, 4} (614320);Fanconi anemia, complementation group S (617883) (AR)	0.00173256	0.00134192	0.0107399	0.00206475	0.0006371	0.00154009	0.00234069	0.00161381	0.00173256	0.00134192	0.0107399	0.00256874	0.000674525	0.00167691	0.00275772	0.0018527	0.00207888	0.00134192	0.0107399	0.00256874	0.000711941	0.00178827	0.00280403	0.0018527	0.00173256	0.00134192	0.0107399	0.00206475	0.0006371	0.00154009	0.00234069	0.00161381	0.00173256	0.00134192	0.0107399	0.00256874	0.000674525	0.00167691	0.00275772	0.0018527	0.00207888	0.00134192	0.0107399
BRCA1	LOF	AD	BRCA1-AD	Severe Paediatric Disorders	Severe Paediatric Disorders	{Breast-ovarian cancer, familial, 1} (604370) (AD, Mu);{Pancreatic cancer, susceptibility to, 4} (614320);Fanconi anemia, complementation group S (617883) (AR)	0.00173256	0.00134192	0.0107399	0.00206475	0.0006371	0.00154009	0.00234069	0.00161381	0.00173256	0.00134192	0.0107399	0.00256874	0.000674525	0.00167691	0.00275772	0.0018527	0.00207888	0.00134192	0.0107399	0.00256874	0.000711941	0.00178827	0.00280403	0.0018527	0.00173256	0.00134192	0.0107399	0.00206475	0.0006371	0.00154009	0.00234069	0.00161381	0.00173256	0.00134192	0.0107399	0.00256874	0.000674525	0.00167691	0.00275772	0.0018527	0.00207888	0.00134192	0.0107399
TTR	GOF	AD	TTR-AD	Severe Paediatric Disorders	Severe Paediatric Disorders	[Dystransthyretinemic hyperthyroxinemia] (145680) (AD);Amyloidosis, hereditary, transthyretin-related (105210) (AD);Carpal tunnel syndrome, familial (115430) (AD)	0.0017322	0.00174252	0	5.03816e-05	0.000149785	0.000206817	0.000347733	0.0344509	0.00277008	0.00303628	0	0.00025187	0.000262083	0.000598746	0.000509968	0.0349119	0.00277008	0.00303628	0	0.0003526	0.000299515	0.000641885	0.000533142	0.0361212	0.0017322	0.00174252	0	5.03816e-05	0.000149785	0.000206817	0.000347733	0.0344509	0.00277008	0.00303628	0	0.00025187	0.000262083	0.000598746	0.000509968	0.0349119	0.00277008	0.00303628	0
TTR	GOF	AD	TTR-AD	Periodic fever syndromes	Rheumatic	[Dystransthyretinemic hyperthyroxinemia] (145680) (AD);Amyloidosis, hereditary, transthyretin-related (105210) (AD);Carpal tunnel syndrome, familial (115430) (AD)	0.0017322	0.00174252	0	5.03816e-05	0.000149785	0.000206817	0.000347733	0.0344509	0.00277008	0.00303628	0	0.00025187	0.000262083	0.000598746	0.000509968	0.0349119	0.00277008	0.00303628	0	0.0003526	0.000299515	0.000641885	0.000533142	0.0361212	0.0017322	0.00174252	0	5.03816e-05	0.000149785	0.000206817	0.000347733	0.0344509	0.00277008	0.00303628	0	0.00025187	0.000262083	0.000598746	0.000509968	0.0349119	0.00277008	0.00303628	0
TTR	GOF	AD	TTR-AD	Adult onset leukodystrophy	Neurological	[Dystransthyretinemic hyperthyroxinemia] (145680) (AD);Amyloidosis, hereditary, transthyretin-related (105210) (AD);Carpal tunnel syndrome, familial (115430) (AD)	0.0017322	0.00174252	0	5.03816e-05	0.000149785	0.000206817	0.000347733	0.0344509	0.00277008	0.00303628	0	0.00025187	0.000262083	0.000598746	0.000509968	0.0349119	0.00277008	0.00303628	0	0.0003526	0.000299515	0.000641885	0.000533142	0.0361212	0.0017322	0.00174252	0	5.03816e-05	0.000149785	0.000206817	0.000347733	0.0344509	0.00277008	0.00303628	0	0.00025187	0.000262083	0.000598746	0.000509968	0.0349119	0.00277008	0.00303628	0
TTR	GOF	AD	TTR-AD	Hyperthyroidism	Endocrine	[Dystransthyretinemic hyperthyroxinemia] (145680) (AD);Amyloidosis, hereditary, transthyretin-related (105210) (AD);Carpal tunnel syndrome, familial (115430) (AD)	0.0017322	0.00174252	0	5.03816e-05	0.000149785	0.000206817	0.000347733	0.0344509	0.00277008	0.00303628	0	0.00025187	0.000262083	0.000598746	0.000509968	0.0349119	0.00277008	0.00303628	0	0.0003526	0.000299515	0.000641885	0.000533142	0.0361212	0.0017322	0.00174252	0	5.03816e-05	0.000149785	0.000206817	0.000347733	0.0344509	0.00277008	0.00303628	0	0.00025187	0.000262083	0.000598746	0.000509968	0.0349119	0.00277008	0.00303628	0
TTR	GOF	AD	TTR-AD	Progressive cardiac conduction disease	Cardiovascular	[Dystransthyretinemic hyperthyroxinemia] (145680) (AD);Amyloidosis, hereditary, transthyretin-related (105210) (AD);Carpal tunnel syndrome, familial (115430) (AD)	0.0017322	0.00174252	0	5.03816e-05	0.000149785	0.000206817	0.000347733	0.0344509	0.00277008	0.00303628	0	0.00025187	0.000262083	0.000598746	0.000509968	0.0349119	0.00277008	0.00303628	0	0.0003526	0.000299515	0.000641885	0.000533142	0.0361212	0.0017322	0.00174252	0	5.03816e-05	0.000149785	0.000206817	0.000347733	0.0344509	0.00277008	0.00303628	0	0.00025187	0.000262083	0.000598746	0.000509968	0.0349119	0.00277008	0.00303628	0
CRYAA	LOF	AD	CRYAA-AD	Fetal anomalies	Congenital/Developmental	Cataract 9, multiple types (604219) (AD, AR)	0.001524	0	0	0	0	5.7092e-06	0	0	0.001524	0	0.00119003	0	0	4.66291e-05	7.98265e-05	0.000443606	0.001524	0	0.00119003	0.000157554	6.62581e-05	4.95904e-05	7.98265e-05	0.000443606	0.001524	0	0	0	0	5.7092e-06	0	0	0.001524	0	0.00119003	0	0	4.66291e-05	7.98265e-05	0.000443606	0.001524	0	0.00119003
CRYAA	LOF	AD	CRYAA-AD	Severe Paediatric Disorders	Severe Paediatric Disorders	Cataract 9, multiple types (604219) (AD, AR)	0.001524	0	0	0	0	5.7092e-06	0	0	0.001524	0	0.00119003	0	0	4.66291e-05	7.98265e-05	0.000443606	0.001524	0	0.00119003	0.000157554	6.62581e-05	4.95904e-05	7.98265e-05	0.000443606	0.001524	0	0	0	0	5.7092e-06	0	0	0.001524	0	0.00119003	0	0	4.66291e-05	7.98265e-05	0.000443606	0.001524	0	0.00119003
CRYAA	LOF	AD	CRYAA-AD	Bilateral congenital or childhood onset cataracts	Eye	Cataract 9, multiple types (604219) (AD, AR)	0.001524	0	0	0	0	5.7092e-06	0	0	0.001524	0	0.00119003	0	0	4.66291e-05	7.98265e-05	0.000443606	0.001524	0	0.00119003	0.000157554	6.62581e-05	4.95904e-05	7.98265e-05	0.000443606	0.001524	0	0	0	0	5.7092e-06	0	0	0.001524	0	0.00119003	0	0	4.66291e-05	7.98265e-05	0.000443606	0.001524	0	0.00119003
MFRP	LOF	AD	MFRP-AD	Severe Paediatric Disorders	Severe Paediatric Disorders	Microphthalmia, isolated 5 (611040) (AR);Nanophthalmos 2 (609549)	0.00141187	0.00116351	0	0.000661138	0.000607328	0.0013345	0.00046528	0.00101521	0.00175806	0.00197406	0.00015304	0.00151801	0.000872684	0.00227742	0.00157781	0.00131365	0.00175806	0.00273252	0.00015304	0.00156831	0.000872684	0.00235278	0.00162411	0.00131365	0.00141187	0.00116351	0	0.000661138	0.000607328	0.0013345	0.00046528	0.00101521	0.00175806	0.00197406	0.00015304	0.00151801	0.000872684	0.00227742	0.00157781	0.00131365	0.00175806	0.00273252	0.00015304
BEST1	LOF	AD	BEST1-AD	Structural eye disease	Eye	?Microcornea, rod-cone dystrophy, cataract, and posterior staphyloma 2 (193220) (AD);Bestrophinopathy, autosomal recessive (611809);Macular dystrophy, vitelliform, 2 (153700) (AD);Retinitis pigmentosa-50 (613194);Retinitis pigmentosa, concentric (613194);Vitreoretinochoroidopathy (193220) (AD)	0.00139818	0.00194447	0.00285375	0.0065335	0.00608267	0.00241386	0.000824846	0.00150698	0.00174692	0.00321655	0.00293005	0.00725116	0.00634804	0.00338449	0.00227554	0.00265045	0.00278478	0.00370757	0.00354025	0.00793906	0.00655069	0.00378085	0.00295483	0.00313764	0.00139818	0.00194447	0.00285375	0.0065335	0.00608267	0.00241386	0.000824846	0.00150698	0.00174692	0.00321655	0.00293005	0.00725116	0.00634804	0.00338449	0.00227554	0.00265045	0.00278478	0.00370757	0.00354025
KCNQ1	Both	AD	KCNQ1-AD	Severe Paediatric Disorders	Severe Paediatric Disorders	{Long QT syndrome 1, acquired, susceptibility to} (192500) (AD);Atrial fibrillation, familial, 3 (607554) (AD);Jervell and Lange-Nielsen syndrome (220400) (AR);Long QT syndrome 1 (192500) (AD);Short QT syndrome 2 (609621) (AD)	0.00139703	0.0014911	0.000308991	0.00121434	0.0017595	0.00219176	0.00194711	0.00125557	0.00278313	0.00301408	0.000844611	0.00262581	0.00228767	0.00322239	0.00294582	0.00184643	0.00589337	0.00460203	0.00244905	0.00548052	0.00335396	0.00488878	0.00574614	0.00350027	0.00139703	0.0014911	0.000308991	0.00121434	0.0017595	0.00219176	0.00194711	0.00125557	0.00278313	0.00301408	0.000844611	0.00262581	0.00228767	0.00322239	0.00294582	0.00184643	0.00589337	0.00460203	0.00244905
KCNQ1	Both	AD	KCNQ1-AD	Short QT syndrome	Cardiovascular	{Long QT syndrome 1, acquired, susceptibility to} (192500) (AD);Atrial fibrillation, familial, 3 (607554) (AD);Jervell and Lange-Nielsen syndrome (220400) (AR);Long QT syndrome 1 (192500) (AD);Short QT syndrome 2 (609621) (AD)	0.00139703	0.0014911	0.000308991	0.00121434	0.0017595	0.00219176	0.00194711	0.00125557	0.00278313	0.00301408	0.000844611	0.00262581	0.00228767	0.00322239	0.00294582	0.00184643	0.00589337	0.00460203	0.00244905	0.00548052	0.00335396	0.00488878	0.00574614	0.00350027	0.00139703	0.0014911	0.000308991	0.00121434	0.0017595	0.00219176	0.00194711	0.00125557	0.00278313	0.00301408	0.000844611	0.00262581	0.00228767	0.00322239	0.00294582	0.00184643	0.00589337	0.00460203	0.00244905
COL4A4	LOF	AD	COL4A4-AD	Severe Paediatric Disorders	Severe Paediatric Disorders	Alport syndrome 2, autosomal recessive (203780) (AR);Hematuria, familial benign, 1 (141200) (AD)	0.00139332	0.00098341	0.000535833	0.00135991	0.000187274	0.00169389	0.00185657	0.00083612	0.00563746	0.003489	0.0017614	0.00407861	0.000863414	0.00404043	0.00648428	0.00493581	0.00667827	0.0102883	0.00580344	0.00538234	0.00146191	0.00494558	0.00785016	0.00630248	0.00139332	0.00098341	0.000535833	0.00135991	0.000187274	0.00169389	0.00185657	0.00083612	0.00563746	0.003489	0.0017614	0.00407861	0.000863414	0.00404043	0.00648428	0.00493581	0.00667827	0.0102883	0.00580344
COL4A4	LOF	AD	COL4A4-AD	Unexplained kidney failure in young people	Kidney/Urinary System	Alport syndrome 2, autosomal recessive (203780) (AR);Hematuria, familial benign, 1 (141200) (AD)	0.00139332	0.00098341	0.000535833	0.00135991	0.000187274	0.00169389	0.00185657	0.00083612	0.00563746	0.003489	0.0017614	0.00407861	0.000863414	0.00404043	0.00648428	0.00493581	0.00667827	0.0102883	0.00580344	0.00538234	0.00146191	0.00494558	0.00785016	0.00630248	0.00139332	0.00098341	0.000535833	0.00135991	0.000187274	0.00169389	0.00185657	0.00083612	0.00563746	0.003489	0.0017614	0.00407861	0.000863414	0.00404043	0.00648428	0.00493581	0.00667827	0.0102883	0.00580344
MYBPC3	LOF	AD	MYBPC3-AD	Left Ventricular Noncompaction Cardiomyopathy	Cardiovascular	Cardiomyopathy, dilated, 1MM (615396) (AD);Cardiomyopathy, hypertrophic, 4 (115197) (AD, AR);Left ventricular noncompaction 10 (615396) (AD)	0.00138841	0.00120677	0.000627967	0.00124196	0.000782821	0.0012142	0.00170502	0.00193031	0.00211477	0.00247009	0.000780934	0.00190651	0.00118318	0.00217023	0.00272875	0.00254051	0.00211477	0.00278251	0.000780934	0.00341426	0.00118318	0.00257604	0.00317184	0.00266013	0.00138841	0.00120677	0.000627967	0.00124196	0.000782821	0.0012142	0.00170502	0.00193031	0.00211477	0.00247009	0.000780934	0.00190651	0.00118318	0.00217023	0.00272875	0.00254051	0.00211477	0.00278251	0.000780934
EIF2AK4	LOF	AD	EIF2AK4-AD	Pulmonary arterial hypertension	Cardiovascular	Pulmonary venoocclusive disease 2 (234810) (AR)	0.00138792	0.000224714	7.65961e-05	0.000403319	0.00030175	0.000996978	0.000584661	0.00131984	0.00208165	0.00110115	0.000535838	0.000974633	0.0006562	0.00209198	0.001379	0.00191767	0.00415559	0.00119068	0.00237028	0.00107588	0.000814534	0.00235413	0.00166033	0.00227826	0.00138792	0.000224714	7.65961e-05	0.000403319	0.00030175	0.000996978	0.000584661	0.00131984	0.00208165	0.00110115	0.000535838	0.000974633	0.0006562	0.00209198	0.001379	0.00191767	0.00415559	0.00119068	0.00237028
LAMA3	LOF	AD	LAMA3-AD	Amelogenesis imperfecta	Skeletal/Connective Tissue	Epidermolysis bullosa, junctional 2A, intermediate (619783) (AR);Epidermolysis bullosa, junctional 2B, severe (619784) (AR);Epidermolysis bullosa, junctional 2C, laryngoonychocutaneous (245660) (AR)	0.00138757	0.00196591	0.000229959	0.0013095	0.000273648	0.0011188	0.00129993	0.00155928	0.00318292	0.00309473	0.000385155	0.00783123	0.00138317	0.00251333	0.0024886	0.00329552	0.00353189	0.00481586	0.00367272	0.0113942	0.00179489	0.00320789	0.00422986	0.00365884	0.00138757	0.00196591	0.000229959	0.0013095	0.000273648	0.0011188	0.00129993	0.00155928	0.00318292	0.00309473	0.000385155	0.00783123	0.00138317	0.00251333	0.0024886	0.00329552	0.00353189	0.00481586	0.00367272
SLC6A19	LOF	AD	SLC6A19-AD	Severe Paediatric Disorders	Severe Paediatric Disorders	Hartnup disorder (234500) (AR)	0.0013872	0.00035777	7.65667e-05	0.00130914	0.00250723	0.00134331	0.000927185	0.00155213	0.0013872	0.000849539	0.000229747	0.00206356	0.00322784	0.00246908	0.00189972	0.00268485	0.00207972	0.00160905	0.000306249	0.004123	0.00357346	0.0035186	0.00250135	0.00322131	0.0013872	0.00035777	7.65667e-05	0.00130914	0.00250723	0.00134331	0.000927185	0.00155213	0.0013872	0.000849539	0.000229747	0.00206356	0.00322784	0.00246908	0.00189972	0.00268485	0.00207972	0.00160905	0.000306249
SLC6A19	LOF	AD	SLC6A19-AD	Undiagnosed metabolic disorders	Metabolic	Hartnup disorder (234500) (AR)	0.0013872	0.00035777	7.65667e-05	0.00130914	0.00250723	0.00134331	0.000927185	0.00155213	0.0013872	0.000849539	0.000229747	0.00206356	0.00322784	0.00246908	0.00189972	0.00268485	0.00207972	0.00160905	0.000306249	0.004123	0.00357346	0.0035186	0.00250135	0.00322131	0.0013872	0.00035777	7.65667e-05	0.00130914	0.00250723	0.00134331	0.000927185	0.00155213	0.0013872	0.000849539	0.000229747	0.00206356	0.00322784	0.00246908	0.00189972	0.00268485	0.00207972	0.00160905	0.000306249
ABCC8	LOF	AD	ABCC8-AD	Severe Paediatric Disorders	Severe Paediatric Disorders	Diabetes mellitus, noninsulin-dependent (125853) (AD);Diabetes mellitus, permanent neonatal 3, with or without neurologic features (618857) (AD, AR);Diabetes mellitus, transient neonatal 2 (610374);Hyperinsulinemic hypoglycemia, familial, 1 (256450) (AD, AR);Hypoglycemia of infancy, leucine-sensitive (240800) (AD);Diabetes mellitus, noninsulin-dependent (125853) (AD);Diabetes mellitus, permanent …	0.00138696	0.00273596	0.0140632	0.0022413	0.00351221	0.00192034	0.00161365	0.00132485	0.00381738	0.00411019	0.017168	0.00421486	0.00442422	0.00341735	0.00393514	0.00299872	0.00661035	0.00609252	0.0177705	0.0069271	0.00517777	0.00628532	0.00701678	0.005441	0.00138696	0.00273596	0.0140632	0.0022413	0.00351221	0.00192034	0.00161365	0.00132485	0.00381738	0.00411019	0.017168	0.00421486	0.00442422	0.00341735	0.00393514	0.00299872	0.00661035	0.00609252	0.0177705
ABCC8	LOF	AD	ABCC8-AD	Diabetes with additional phenotypes suggestive of a monogenic aetiology	Endocrine	Diabetes mellitus, noninsulin-dependent (125853) (AD);Diabetes mellitus, permanent neonatal 3, with or without neurologic features (618857) (AD, AR);Diabetes mellitus, transient neonatal 2 (610374);Hyperinsulinemic hypoglycemia, familial, 1 (256450) (AD, AR);Hypoglycemia of infancy, leucine-sensitive (240800) (AD);Diabetes mellitus, noninsulin-dependent (125853) (AD);Diabetes mellitus, permanent …	0.00138696	0.00273596	0.0140632	0.0022413	0.00351221	0.00192034	0.00161365	0.00132485	0.00381738	0.00411019	0.017168	0.00421486	0.00442422	0.00341735	0.00393514	0.00299872	0.00661035	0.00609252	0.0177705	0.0069271	0.00517777	0.00628532	0.00701678	0.005441	0.00138696	0.00273596	0.0140632	0.0022413	0.00351221	0.00192034	0.00161365	0.00132485	0.00381738	0.00411019	0.017168	0.00421486	0.00442422	0.00341735	0.00393514	0.00299872	0.00661035	0.00609252	0.0177705
TTC21B	LOF	AD	TTC21B-AD	Severe Paediatric Disorders	Severe Paediatric Disorders	Nephronophthisis 12 (613820) (AD, AR);Short-rib thoracic dysplasia 4 with or without polydactyly (613819) (AR)	0.00138684	0.00185653	0.00191275	0.0009591	0.000337933	0.00144401	0.00102049	0.00157269	0.0017334	0.00350957	0.00214196	0.00186669	0.00131389	0.0019876	0.00286607	0.00246348	0.0017334	0.00350957	0.00214196	0.00186669	0.00131389	0.00201273	0.00293549	0.00252315	0.00138684	0.00185653	0.00191275	0.0009591	0.000337933	0.00144401	0.00102049	0.00157269	0.0017334	0.00350957	0.00214196	0.00186669	0.00131389	0.0019876	0.00286607	0.00246348	0.0017334	0.00350957	0.00214196
CPT2	LOF	AD	CPT2-AD	Severe Paediatric Disorders	Severe Paediatric Disorders	{Encephalopathy, acute, infection-induced, 4, susceptibility to} (614212) (AD, AR);CPT II deficiency, infantile (600649) (AR);CPT II deficiency, lethal neonatal (608836) (AR);CPT II deficiency, myopathic, stress-induced (255110) (AD, AR)	0.00138672	0.00346136	0.0287498	0.0026167	0.00519363	0.00520822	0.00135865	0.00311429	0.00138672	0.00404055	0.0287498	0.00352073	0.00537558	0.00567008	0.00180058	0.00329294	0.002079	0.00542027	0.0288991	0.00448141	0.00600851	0.00707132	0.00221732	0.00501826	0.00138672	0.00346136	0.0287498	0.0026167	0.00519363	0.00520822	0.00135865	0.00311429	0.00138672	0.00404055	0.0287498	0.00352073	0.00537558	0.00567008	0.00180058	0.00329294	0.002079	0.00542027	0.0288991
CPT2	LOF	AD	CPT2-AD	Rhabdomyolysis and metabolic muscle disorders	Neuromuscular	{Encephalopathy, acute, infection-induced, 4, susceptibility to} (614212) (AD, AR);CPT II deficiency, infantile (600649) (AR);CPT II deficiency, lethal neonatal (608836) (AR);CPT II deficiency, myopathic, stress-induced (255110) (AD, AR)	0.00138672	0.00346136	0.0287498	0.0026167	0.00519363	0.00520822	0.00135865	0.00311429	0.00138672	0.00404055	0.0287498	0.00352073	0.00537558	0.00567008	0.00180058	0.00329294	0.002079	0.00542027	0.0288991	0.00448141	0.00600851	0.00707132	0.00221732	0.00501826	0.00138672	0.00346136	0.0287498	0.0026167	0.00519363	0.00520822	0.00135865	0.00311429	0.00138672	0.00404055	0.0287498	0.00352073	0.00537558	0.00567008	0.00180058	0.00329294	0.002079	0.00542027	0.0288991
CPT2	LOF	AD	CPT2-AD	Undiagnosed metabolic disorders	Metabolic	{Encephalopathy, acute, infection-induced, 4, susceptibility to} (614212) (AD, AR);CPT II deficiency, infantile (600649) (AR);CPT II deficiency, lethal neonatal (608836) (AR);CPT II deficiency, myopathic, stress-induced (255110) (AD, AR)	0.00138672	0.00346136	0.0287498	0.0026167	0.00519363	0.00520822	0.00135865	0.00311429	0.00138672	0.00404055	0.0287498	0.00352073	0.00537558	0.00567008	0.00180058	0.00329294	0.002079	0.00542027	0.0288991	0.00448141	0.00600851	0.00707132	0.00221732	0.00501826	0.00138672	0.00346136	0.0287498	0.0026167	0.00519363	0.00520822	0.00135865	0.00311429	0.00138672	0.00404055	0.0287498	0.00352073	0.00537558	0.00567008	0.00180058	0.00329294	0.002079	0.00542027	0.0288991
CPT2	LOF	AD	CPT2-AD	Paediatric or syndromic cardiomyopathy	Cardiovascular	{Encephalopathy, acute, infection-induced, 4, susceptibility to} (614212) (AD, AR);CPT II deficiency, infantile (600649) (AR);CPT II deficiency, lethal neonatal (608836) (AR);CPT II deficiency, myopathic, stress-induced (255110) (AD, AR)	0.00138672	0.00346136	0.0287498	0.0026167	0.00519363	0.00520822	0.00135865	0.00311429	0.00138672	0.00404055	0.0287498	0.00352073	0.00537558	0.00567008	0.00180058	0.00329294	0.002079	0.00542027	0.0288991	0.00448141	0.00600851	0.00707132	0.00221732	0.00501826	0.00138672	0.00346136	0.0287498	0.0026167	0.00519363	0.00520822	0.00135865	0.00311429	0.00138672	0.00404055	0.0287498	0.00352073	0.00537558	0.00567008	0.00180058	0.00329294	0.002079	0.00542027	0.0288991
SLC37A4	LOF	AD	SLC37A4-AD	DDG2P	Congenital/Developmental	Congenital disorder of glycosylation, type IIw (619525) (AD);Glycogen storage disease Ib (232220) (AR);Glycogen storage disease Ic (232240) (AR)	0.00138624	0.000901935	0.000689177	0.00121222	0.000452769	0.00109125	0.00058854	0.00107702	0.00138624	0.000947659	0.000765656	0.00202275	0.000683747	0.00155215	0.0010782	0.00162655	0.00138624	0.000947659	0.000765656	0.00207326	0.000683747	0.00157193	0.0010782	0.00180546	0.00138624	0.000901935	0.000689177	0.00121222	0.000452769	0.00109125	0.00058854	0.00107702	0.00138624	0.000947659	0.000765656	0.00202275	0.000683747	0.00155215	0.0010782	0.00162655	0.00138624	0.000947659	0.000765656
SLC37A4	LOF	AD	SLC37A4-AD	Congenital disorders of glycosylation	Metabolic	Congenital disorder of glycosylation, type IIw (619525) (AD);Glycogen storage disease Ib (232220) (AR);Glycogen storage disease Ic (232240) (AR)	0.00138624	0.000901935	0.000689177	0.00121222	0.000452769	0.00109125	0.00058854	0.00107702	0.00138624	0.000947659	0.000765656	0.00202275	0.000683747	0.00155215	0.0010782	0.00162655	0.00138624	0.000947659	0.000765656	0.00207326	0.000683747	0.00157193	0.0010782	0.00180546	0.00138624	0.000901935	0.000689177	0.00121222	0.000452769	0.00109125	0.00058854	0.00107702	0.00138624	0.000947659	0.000765656	0.00202275	0.000683747	0.00155215	0.0010782	0.00162655	0.00138624	0.000947659	0.000765656
MSH6	LOF	AD	MSH6-AD	Genodermatoses with malignancies	Neoplasm	{Endometrial cancer, familial} (608089) (AD, SMu);Lynch syndrome 5 (614350) (AD);Mismatch repair cancer syndrome 3 (619097) (AR);{Endometrial cancer, familial} (608089) (AD, SMu);Lynch syndrome 5 (614350) (AD);Mismatch repair cancer syndrome 3 (619097) (AR);{Endometrial cancer, familial} (608089) (AD, SMu);Lynch syndrome 5 (614350) (AD);Mismatch repair cancer syndrome 3 (619097) (AR)	0.00138612	0.000783941	0.00183562	0.000957188	0.00113118	0.000993611	0.000974268	0.00101529	0.00138612	0.000783941	0.001912	0.00115859	0.00131822	0.00121009	0.00111382	0.00125413	0.00173232	0.000917995	0.00198837	0.00176228	0.00154253	0.00140825	0.00129909	0.00137345	0.00138612	0.000783941	0.00183562	0.000957188	0.00113118	0.000993611	0.000974268	0.00101529	0.00138612	0.000783941	0.001912	0.00115859	0.00131822	0.00121009	0.00111382	0.00125413	0.00173232	0.000917995	0.00198837
MSH6	LOF	AD	MSH6-AD	Additional findings health related - adult specific	Neoplasm	{Endometrial cancer, familial} (608089) (AD, SMu);Lynch syndrome 5 (614350) (AD);Mismatch repair cancer syndrome 3 (619097) (AR);{Endometrial cancer, familial} (608089) (AD, SMu);Lynch syndrome 5 (614350) (AD);Mismatch repair cancer syndrome 3 (619097) (AR);{Endometrial cancer, familial} (608089) (AD, SMu);Lynch syndrome 5 (614350) (AD);Mismatch repair cancer syndrome 3 (619097) (AR)	0.00138612	0.000783941	0.00183562	0.000957188	0.00113118	0.000993611	0.000974268	0.00101529	0.00138612	0.000783941	0.001912	0.00115859	0.00131822	0.00121009	0.00111382	0.00125413	0.00173232	0.000917995	0.00198837	0.00176228	0.00154253	0.00140825	0.00129909	0.00137345	0.00138612	0.000783941	0.00183562	0.000957188	0.00113118	0.000993611	0.000974268	0.00101529	0.00138612	0.000783941	0.001912	0.00115859	0.00131822	0.00121009	0.00111382	0.00125413	0.00173232	0.000917995	0.00198837
MSH6	LOF	AD	MSH6-AD	Severe Paediatric Disorders	Severe Paediatric Disorders	{Endometrial cancer, familial} (608089) (AD, SMu);Lynch syndrome 5 (614350) (AD);Mismatch repair cancer syndrome 3 (619097) (AR);{Endometrial cancer, familial} (608089) (AD, SMu);Lynch syndrome 5 (614350) (AD);Mismatch repair cancer syndrome 3 (619097) (AR);{Endometrial cancer, familial} (608089) (AD, SMu);Lynch syndrome 5 (614350) (AD);Mismatch repair cancer syndrome 3 (619097) (AR)	0.00138612	0.000783941	0.00183562	0.000957188	0.00113118	0.000993611	0.000974268	0.00101529	0.00138612	0.000783941	0.001912	0.00115859	0.00131822	0.00121009	0.00111382	0.00125413	0.00173232	0.000917995	0.00198837	0.00176228	0.00154253	0.00140825	0.00129909	0.00137345	0.00138612	0.000783941	0.00183562	0.000957188	0.00113118	0.000993611	0.000974268	0.00101529	0.00138612	0.000783941	0.001912	0.00115859	0.00131822	0.00121009	0.00111382	0.00125413	0.00173232	0.000917995	0.00198837
BICRA	LOF	AD	BICRA-AD	DDG2P	Congenital/Developmental	Coffin-Siris syndrome 12 (619325) (AD)	0.00122424	0.000177961	0.000535382	0.000447187	0.000453739	0.00165772	0.000392401	0.000774402	0.00350155	0.000926529	0.00156139	0.00113324	0.00359089	0.00316276	0.00184847	0.00221815	0.00350155	0.000926529	0.00156139	0.00113324	0.00359089	0.00320764	0.00184847	0.00221815	0.00122424	0.000177961	0.000535382	0.000447187	0.000453739	0.00165772	0.000392401	0.000774402	0.00350155	0.000926529	0.00156139	0.00113324	0.00359089	0.00316276	0.00184847	0.00221815	0.00350155	0.000926529	0.00156139
BICRA	LOF	AD	BICRA-AD	Intellectual disability - microarray and sequencing	Neurological	Coffin-Siris syndrome 12 (619325) (AD)	0.00122424	0.000177961	0.000535382	0.000447187	0.000453739	0.00165772	0.000392401	0.000774402	0.00350155	0.000926529	0.00156139	0.00113324	0.00359089	0.00316276	0.00184847	0.00221815	0.00350155	0.000926529	0.00156139	0.00113324	0.00359089	0.00320764	0.00184847	0.00221815	0.00122424	0.000177961	0.000535382	0.000447187	0.000453739	0.00165772	0.000392401	0.000774402	0.00350155	0.000926529	0.00156139	0.00113324	0.00359089	0.00316276	0.00184847	0.00221815	0.00350155	0.000926529	0.00156139
COL17A1	LOF	AD	COL17A1-AD	Epidermolysis bullosa	Skin	Epidermolysis bullosa, junctional 4, intermediate (619787) (AR);Epithelial recurrent erosion dystrophy (122400) (AD)	0.00115174	0.00129681	0.00709305	0.000605171	0.00202951	0.000803111	0.00121298	0.0024499	0.00541376	0.0024128	0.00716903	0.00281866	0.00274969	0.00174014	0.00258293	0.00821433	0.00541376	0.0024128	0.00716903	0.00287238	0.00274969	0.00175452	0.00265316	0.00827357	0.00115174	0.00129681	0.00709305	0.000605171	0.00202951	0.000803111	0.00121298	0.0024499	0.00541376	0.0024128	0.00716903	0.00281866	0.00274969	0.00174014	0.00258293	0.00821433	0.00541376	0.0024128	0.00716903
COL17A1	LOF	AD	COL17A1-AD	Amelogenesis imperfecta	Skeletal/Connective Tissue	Epidermolysis bullosa, junctional 4, intermediate (619787) (AR);Epithelial recurrent erosion dystrophy (122400) (AD)	0.00115174	0.00129681	0.00709305	0.000605171	0.00202951	0.000803111	0.00121298	0.0024499	0.00541376	0.0024128	0.00716903	0.00281866	0.00274969	0.00174014	0.00258293	0.00821433	0.00541376	0.0024128	0.00716903	0.00287238	0.00274969	0.00175452	0.00265316	0.00827357	0.00115174	0.00129681	0.00709305	0.000605171	0.00202951	0.000803111	0.00121298	0.0024499	0.00541376	0.0024128	0.00716903	0.00281866	0.00274969	0.00174014	0.00258293	0.00821433	0.00541376	0.0024128	0.00716903
COL17A1	LOF	AD	COL17A1-AD	Severe Paediatric Disorders	Severe Paediatric Disorders	Epidermolysis bullosa, junctional 4, intermediate (619787) (AR);Epithelial recurrent erosion dystrophy (122400) (AD)	0.00115174	0.00129681	0.00709305	0.000605171	0.00202951	0.000803111	0.00121298	0.0024499	0.00541376	0.0024128	0.00716903	0.00281866	0.00274969	0.00174014	0.00258293	0.00821433	0.00541376	0.0024128	0.00716903	0.00287238	0.00274969	0.00175452	0.00265316	0.00827357	0.00115174	0.00129681	0.00709305	0.000605171	0.00202951	0.000803111	0.00121298	0.0024499	0.00541376	0.0024128	0.00716903	0.00281866	0.00274969	0.00174014	0.00258293	0.00821433	0.00541376	0.0024128	0.00716903
COL17A1	LOF	AD	COL17A1-AD	Corneal dystrophy	Eye	Epidermolysis bullosa, junctional 4, intermediate (619787) (AR);Epithelial recurrent erosion dystrophy (122400) (AD)	0.00115174	0.00129681	0.00709305	0.000605171	0.00202951	0.000803111	0.00121298	0.0024499	0.00541376	0.0024128	0.00716903	0.00281866	0.00274969	0.00174014	0.00258293	0.00821433	0.00541376	0.0024128	0.00716903	0.00287238	0.00274969	0.00175452	0.00265316	0.00827357	0.00115174	0.00129681	0.00709305	0.000605171	0.00202951	0.000803111	0.00121298	0.0024499	0.00541376	0.0024128	0.00716903	0.00281866	0.00274969	0.00174014	0.00258293	0.00821433	0.00541376	0.0024128	0.00716903
SLC12A6	LOF	AD	SLC12A6-AD	Fetal anomalies	Congenital/Developmental	Agenesis of the corpus callosum with peripheral neuropathy (218000) (AR);Charcot-Marie-Tooth disease, axonal, type 2II (620068) (AD)	0.00108676	0.00111776	0.000544343	0.00020226	0.000224697	0.000288182	0.000116445	0.000179614	0.00143342	0.00129679	0.000851446	0.000405654	0.00041185	0.000801839	0.000702878	0.000659042	0.00212603	0.0022343	0.00146315	0.000859305	0.000749125	0.00160804	0.0015843	0.00113973	0.00108676	0.00111776	0.000544343	0.00020226	0.000224697	0.000288182	0.000116445	0.000179614	0.00143342	0.00129679	0.000851446	0.000405654	0.00041185	0.000801839	0.000702878	0.000659042	0.00212603	0.0022343	0.00146315
SLC12A6	LOF	AD	SLC12A6-AD	Hereditary neuropathy	Neurological	Agenesis of the corpus callosum with peripheral neuropathy (218000) (AR);Charcot-Marie-Tooth disease, axonal, type 2II (620068) (AD)	0.00108676	0.00111776	0.000544343	0.00020226	0.000224697	0.000288182	0.000116445	0.000179614	0.00143342	0.00129679	0.000851446	0.000405654	0.00041185	0.000801839	0.000702878	0.000659042	0.00212603	0.0022343	0.00146315	0.000859305	0.000749125	0.00160804	0.0015843	0.00113973	0.00108676	0.00111776	0.000544343	0.00020226	0.000224697	0.000288182	0.000116445	0.000179614	0.00143342	0.00129679	0.000851446	0.000405654	0.00041185	0.000801839	0.000702878	0.000659042	0.00212603	0.0022343	0.00146315
CCM2	LOF	AD	CCM2-AD	Cerebral vascular malformations	Congenital/Developmental	Cerebral cavernous malformations-2 (603284) (AD)	0.00108676	0	0	5.03766e-05	0	5.25169e-05	0.000162329	0	0.00108676	0	0	5.03766e-05	7.55245e-05	0.000104995	0.000185527	0.000119603	0.00108676	0	0	5.03766e-05	7.55245e-05	0.000104995	0.000185527	0.000119603	0.00108676	0	0	5.03766e-05	0	5.25169e-05	0.000162329	0	0.00108676	0	0	5.03766e-05	7.55245e-05	0.000104995	0.000185527	0.000119603	0.00108676	0	0
CACNA1S	LOF	AD	CACNA1S-AD	Severe Paediatric Disorders	Severe Paediatric Disorders	{Malignant hyperthermia susceptibility 5} (601887) (AD);{Thyrotoxic periodic paralysis, susceptibility to, 1} (188580) (AD);Congenital myopathy 18 due to dihydropyridine receptor defect (620246) (AD, AR);Hypokalemic periodic paralysis, type 1 (170400) (AD)	0.00104917	0.00125142	0.00107128	0.000202038	0.000188349	0.000495237	0.000418177	0.000358416	0.00209664	0.00267974	0.00114772	0.00151191	0.000450672	0.00114457	0.0016021	0.00447878	0.00452112	0.00481831	0.00130063	0.00518619	0.0011622	0.00353679	0.00704305	0.00602671	0.00104917	0.00125142	0.00107128	0.000202038	0.000188349	0.000495237	0.000418177	0.000358416	0.00209664	0.00267974	0.00114772	0.00151191	0.000450672	0.00114457	0.0016021	0.00447878	0.00452112	0.00481831	0.00130063
CACNA1S	LOF	AD	CACNA1S-AD	Rhabdomyolysis and metabolic muscle disorders	Neuromuscular	{Malignant hyperthermia susceptibility 5} (601887) (AD);{Thyrotoxic periodic paralysis, susceptibility to, 1} (188580) (AD);Congenital myopathy 18 due to dihydropyridine receptor defect (620246) (AD, AR);Hypokalemic periodic paralysis, type 1 (170400) (AD)	0.00104917	0.00125142	0.00107128	0.000202038	0.000188349	0.000495237	0.000418177	0.000358416	0.00209664	0.00267974	0.00114772	0.00151191	0.000450672	0.00114457	0.0016021	0.00447878	0.00452112	0.00481831	0.00130063	0.00518619	0.0011622	0.00353679	0.00704305	0.00602671	0.00104917	0.00125142	0.00107128	0.000202038	0.000188349	0.000495237	0.000418177	0.000358416	0.00209664	0.00267974	0.00114772	0.00151191	0.000450672	0.00114457	0.0016021	0.00447878	0.00452112	0.00481831	0.00130063
CACNA1S	LOF	AD	CACNA1S-AD	Malignant hyperthermia	Neuromuscular	{Malignant hyperthermia susceptibility 5} (601887) (AD);{Thyrotoxic periodic paralysis, susceptibility to, 1} (188580) (AD);Congenital myopathy 18 due to dihydropyridine receptor defect (620246) (AD, AR);Hypokalemic periodic paralysis, type 1 (170400) (AD)	0.00104917	0.00125142	0.00107128	0.000202038	0.000188349	0.000495237	0.000418177	0.000358416	0.00209664	0.00267974	0.00114772	0.00151191	0.000450672	0.00114457	0.0016021	0.00447878	0.00452112	0.00481831	0.00130063	0.00518619	0.0011622	0.00353679	0.00704305	0.00602671	0.00104917	0.00125142	0.00107128	0.000202038	0.000188349	0.000495237	0.000418177	0.000358416	0.00209664	0.00267974	0.00114772	0.00151191	0.000450672	0.00114457	0.0016021	0.00447878	0.00452112	0.00481831	0.00130063
TMC1	LOF	AD	TMC1-AD	Severe Paediatric Disorders	Severe Paediatric Disorders	Deafness, autosomal dominant 36 (606705) (AD);Deafness, autosomal recessive 7 (600974) (AR)	0.00104867	0.000895885	0.000153098	0.000403794	0.00731116	0.00109923	0.000906573	0.00149542	0.00312644	0.00129795	0.00069025	0.00211515	0.00753459	0.00170653	0.0013934	0.00191302	0.00347204	0.00259235	0.00069025	0.00286921	0.010503	0.00436549	0.00245983	0.00376028	0.00104867	0.000895885	0.000153098	0.000403794	0.00731116	0.00109923	0.000906573	0.00149542	0.00312644	0.00129795	0.00069025	0.00211515	0.00753459	0.00170653	0.0013934	0.00191302	0.00347204	0.00259235	0.00069025
TMC1	LOF	AD	TMC1-AD	Monogenic hearing loss	Ear	Deafness, autosomal dominant 36 (606705) (AD);Deafness, autosomal recessive 7 (600974) (AR)	0.00104867	0.000895885	0.000153098	0.000403794	0.00731116	0.00109923	0.000906573	0.00149542	0.00312644	0.00129795	0.00069025	0.00211515	0.00753459	0.00170653	0.0013934	0.00191302	0.00347204	0.00259235	0.00069025	0.00286921	0.010503	0.00436549	0.00245983	0.00376028	0.00104867	0.000895885	0.000153098	0.000403794	0.00731116	0.00109923	0.000906573	0.00149542	0.00312644	0.00129795	0.00069025	0.00211515	0.00753459	0.00170653	0.0013934	0.00191302	0.00347204	0.00259235	0.00069025
WNK4	LOF	AD	WNK4-AD	Renal tubulopathies	Kidney/Urinary System	Pseudohypoaldosteronism, type IIB (614491) (AD)	0.00104804	0.000492442	7.65199e-05	0.000807049	0.000122206	0.000773331	0.0008577	0.00119425	0.00208856	0.00206207	0.000383972	0.00363676	0.00281216	0.00275787	0.00176191	0.00286716	0.00278071	0.00228667	0.000383972	0.00378746	0.00292648	0.00351322	0.00178544	0.00286716	0.00104804	0.000492442	7.65199e-05	0.000807049	0.000122206	0.000773331	0.0008577	0.00119425	0.00208856	0.00206207	0.000383972	0.00363676	0.00281216	0.00275787	0.00176191	0.00286716	0.00278071	0.00228667	0.000383972
WNK4	LOF	AD	WNK4-AD	Extreme early-onset hypertension	Cardiovascular	Pseudohypoaldosteronism, type IIB (614491) (AD)	0.00104804	0.000492442	7.65199e-05	0.000807049	0.000122206	0.000773331	0.0008577	0.00119425	0.00208856	0.00206207	0.000383972	0.00363676	0.00281216	0.00275787	0.00176191	0.00286716	0.00278071	0.00228667	0.000383972	0.00378746	0.00292648	0.00351322	0.00178544	0.00286716	0.00104804	0.000492442	7.65199e-05	0.000807049	0.000122206	0.000773331	0.0008577	0.00119425	0.00208856	0.00206207	0.000383972	0.00363676	0.00281216	0.00275787	0.00176191	0.00286716	0.00278071	0.00228667	0.000383972
COL7A1	LOF	AD	COL7A1-AD	Severe Paediatric Disorders	Severe Paediatric Disorders	Epidermolysis bullosa dystrophica inversa (226600) (AR);Epidermolysis bullosa dystrophica, autosomal dominant (131750) (AD);Epidermolysis bullosa dystrophica, autosomal recessive (226600) (AR);Epidermolysis bullosa dystrophica, Bart type (132000) (AD);Epidermolysis bullosa dystrophica, localisata variant (226600) (AR);Epidermolysis bullosa pruriginosa (604129) (AD, AR);Epidermolysis bullosa, pret…	0.00104697	0.00385433	0.00236953	0.00161565	0.000944548	0.00255862	0.00169632	0.00173149	0.00278148	0.00552648	0.00298009	0.00418312	0.00278302	0.00435662	0.00412747	0.00244705	0.00485577	0.00659395	0.00389914	0.00433605	0.00278302	0.00475657	0.00459176	0.00262581	0.00104697	0.00385433	0.00236953	0.00161565	0.000944548	0.00255862	0.00169632	0.00173149	0.00278148	0.00552648	0.00298009	0.00418312	0.00278302	0.00435662	0.00412747	0.00244705	0.00485577	0.00659395	0.00389914
COL7A1	LOF	AD	COL7A1-AD	Epidermolysis bullosa	Skin	Epidermolysis bullosa dystrophica inversa (226600) (AR);Epidermolysis bullosa dystrophica, autosomal dominant (131750) (AD);Epidermolysis bullosa dystrophica, autosomal recessive (226600) (AR);Epidermolysis bullosa dystrophica, Bart type (132000) (AD);Epidermolysis bullosa dystrophica, localisata variant (226600) (AR);Epidermolysis bullosa pruriginosa (604129) (AD, AR);Epidermolysis bullosa, pret…	0.00104697	0.00385433	0.00236953	0.00161565	0.000944548	0.00255862	0.00169632	0.00173149	0.00278148	0.00552648	0.00298009	0.00418312	0.00278302	0.00435662	0.00412747	0.00244705	0.00485577	0.00659395	0.00389914	0.00433605	0.00278302	0.00475657	0.00459176	0.00262581	0.00104697	0.00385433	0.00236953	0.00161565	0.000944548	0.00255862	0.00169632	0.00173149	0.00278148	0.00552648	0.00298009	0.00418312	0.00278302	0.00435662	0.00412747	0.00244705	0.00485577	0.00659395	0.00389914
BRIP1	LOF	AD	BRIP1-AD	Ovarian cancer pertinent cancer susceptibility	Neoplasm	{Breast cancer, early-onset, susceptibility to} (114480) (AD, SMu);Fanconi anemia, complementation group J (609054);{Breast cancer, early-onset, susceptibility to} (114480) (AD, SMu);Fanconi anemia, complementation group J (609054);{Breast cancer, early-onset, susceptibility to} (114480) (AD, SMu);Fanconi anemia, complementation group J (609054);{Breast cancer, early-onset, susceptibility to} (11…	0.00104652	0.000851943	7.65374e-05	0.00136128	0.0021165	0.0018908	0.0010942	0.00203116	0.00139296	0.00139015	0.000229595	0.00211647	0.00237802	0.00254371	0.00153462	0.00286682	0.00173915	0.00156876	0.000306115	0.00271971	0.00241537	0.00294016	0.00176623	0.0029264	0.00104652	0.000851943	7.65374e-05	0.00136128	0.0021165	0.0018908	0.0010942	0.00203116	0.00139296	0.00139015	0.000229595	0.00211647	0.00237802	0.00254371	0.00153462	0.00286682	0.00173915	0.00156876	0.000306115
SRCAP	LOF	AD	SRCAP-AD	IUGR and IGF abnormalities	Congenital/Developmental	Developmental delay, hypotonia, musculoskeletal defects, and behavioral abnormalities (619595) (AD);Floating-Harbor syndrome (136140) (AD)	0.00104574	0.000858543	0.0012377	0	0.00296698	0.000315907	0.000515162	0.000659295	0.00104574	0.000903259	0.00146907	5.03766e-05	0.00311693	0.000398658	0.000631614	0.000778744	0.00104574	0.000903259	0.00146907	0.000100751	0.00315425	0.000418518	0.000678544	0.000778744	0.00104574	0.000858543	0.0012377	0	0.00296698	0.000315907	0.000515162	0.000659295	0.00104574	0.000903259	0.00146907	5.03766e-05	0.00311693	0.000398658	0.000631614	0.000778744	0.00104574	0.000903259	0.00146907
SRCAP	LOF	AD	SRCAP-AD	Severe Paediatric Disorders	Severe Paediatric Disorders	Developmental delay, hypotonia, musculoskeletal defects, and behavioral abnormalities (619595) (AD);Floating-Harbor syndrome (136140) (AD)	0.00104574	0.000858543	0.0012377	0	0.00296698	0.000315907	0.000515162	0.000659295	0.00104574	0.000903259	0.00146907	5.03766e-05	0.00311693	0.000398658	0.000631614	0.000778744	0.00104574	0.000903259	0.00146907	0.000100751	0.00315425	0.000418518	0.000678544	0.000778744	0.00104574	0.000858543	0.0012377	0	0.00296698	0.000315907	0.000515162	0.000659295	0.00104574	0.000903259	0.00146907	5.03766e-05	0.00311693	0.000398658	0.000631614	0.000778744	0.00104574	0.000903259	0.00146907
SRCAP	LOF	AD	SRCAP-AD	Intellectual disability - microarray and sequencing	Neurological	Developmental delay, hypotonia, musculoskeletal defects, and behavioral abnormalities (619595) (AD);Floating-Harbor syndrome (136140) (AD)	0.00104574	0.000858543	0.0012377	0	0.00296698	0.000315907	0.000515162	0.000659295	0.00104574	0.000903259	0.00146907	5.03766e-05	0.00311693	0.000398658	0.000631614	0.000778744	0.00104574	0.000903259	0.00146907	0.000100751	0.00315425	0.000418518	0.000678544	0.000778744	0.00104574	0.000858543	0.0012377	0	0.00296698	0.000315907	0.000515162	0.000659295	0.00104574	0.000903259	0.00146907	5.03766e-05	0.00311693	0.000398658	0.000631614	0.000778744	0.00104574	0.000903259	0.00146907
CHRNE	LOF	AD	CHRNE-AD	Fetal anomalies	Congenital/Developmental	Myasthenic syndrome, congenital, 4A, slow-channel (605809) (AD, AR);Myasthenic syndrome, congenital, 4B, fast-channel (616324) (AR);Myasthenic syndrome, congenital, 4C, associated with acetylcholine receptor deficiency (608931) (AR)	0.00104439	0.00326775	0.00669759	0.000505115	0.000163143	0.00287657	0.000721879	0.000956317	0.00277911	0.00340159	0.00684964	0.000913637	0.000405033	0.00338393	0.0017448	0.00350402	0.00381891	0.00349074	0.00707841	0.00096397	0.000405033	0.00352336	0.00396037	0.00356375	0.00104439	0.00326775	0.00669759	0.000505115	0.000163143	0.00287657	0.000721879	0.000956317	0.00277911	0.00340159	0.00684964	0.000913637	0.000405033	0.00338393	0.0017448	0.00350402	0.00381891	0.00349074	0.00707841
CHRNE	LOF	AD	CHRNE-AD	Severe Paediatric Disorders	Severe Paediatric Disorders	Myasthenic syndrome, congenital, 4A, slow-channel (605809) (AD, AR);Myasthenic syndrome, congenital, 4B, fast-channel (616324) (AR);Myasthenic syndrome, congenital, 4C, associated with acetylcholine receptor deficiency (608931) (AR)	0.00104439	0.00326775	0.00669759	0.000505115	0.000163143	0.00287657	0.000721879	0.000956317	0.00277911	0.00340159	0.00684964	0.000913637	0.000405033	0.00338393	0.0017448	0.00350402	0.00381891	0.00349074	0.00707841	0.00096397	0.000405033	0.00352336	0.00396037	0.00356375	0.00104439	0.00326775	0.00669759	0.000505115	0.000163143	0.00287657	0.000721879	0.000956317	0.00277911	0.00340159	0.00684964	0.000913637	0.000405033	0.00338393	0.0017448	0.00350402	0.00381891	0.00349074	0.00707841
CHRNE	LOF	AD	CHRNE-AD	Other rare neuromuscular disorders	Neuromuscular	Myasthenic syndrome, congenital, 4A, slow-channel (605809) (AD, AR);Myasthenic syndrome, congenital, 4B, fast-channel (616324) (AR);Myasthenic syndrome, congenital, 4C, associated with acetylcholine receptor deficiency (608931) (AR)	0.00104439	0.00326775	0.00669759	0.000505115	0.000163143	0.00287657	0.000721879	0.000956317	0.00277911	0.00340159	0.00684964	0.000913637	0.000405033	0.00338393	0.0017448	0.00350402	0.00381891	0.00349074	0.00707841	0.00096397	0.000405033	0.00352336	0.00396037	0.00356375	0.00104439	0.00326775	0.00669759	0.000505115	0.000163143	0.00287657	0.000721879	0.000956317	0.00277911	0.00340159	0.00684964	0.000913637	0.000405033	0.00338393	0.0017448	0.00350402	0.00381891	0.00349074	0.00707841
PDE6B	LOF	AD	PDE6B-AD	Retinal disorders	Eye	Night blindness, congenital stationary, autosomal dominant 2 (163500) (AD);Retinitis pigmentosa-40 (613801) (AR)	0.00104379	0.00160875	0.00130293	0.00251968	0.000116673	0.00179087	0.000679804	0.00187633	0.00139387	0.00265547	0.00137936	0.00393498	0.00042314	0.00234377	0.00189306	0.00337685	0.00347945	0.00405619	0.00169295	0.00540488	0.0170765	0.00357966	0.00329035	0.00537813	0.00104379	0.00160875	0.00130293	0.00251968	0.000116673	0.00179087	0.000679804	0.00187633	0.00139387	0.00265547	0.00137936	0.00393498	0.00042314	0.00234377	0.00189306	0.00337685	0.00347945	0.00405619	0.00169295
COL4A3	LOF	AD	COL4A3-AD	DDG2P	Congenital/Developmental	Alport syndrome 3A, autosomal dominant (104200) (AD);Alport syndrome 3B, autosomal recessive (620536);Hematuria, benign familial, 2 (620320) (AD)	0.00104355	0.00309735	0.00272416	0.00142604	0.000786398	0.00189005	0.00140134	0.00149383	0.00417673	0.00692609	0.00371608	0.00454569	0.00138649	0.00530478	0.00541549	0.00399962	0.00624906	0.00865928	0.00379232	0.00750488	0.00187281	0.00629467	0.00724087	0.00537058	0.00104355	0.00309735	0.00272416	0.00142604	0.000786398	0.00189005	0.00140134	0.00149383	0.00417673	0.00692609	0.00371608	0.00454569	0.00138649	0.00530478	0.00541549	0.00399962	0.00624906	0.00865928	0.00379232
COL4A3	LOF	AD	COL4A3-AD	Severe Paediatric Disorders	Severe Paediatric Disorders	Alport syndrome 3A, autosomal dominant (104200) (AD);Alport syndrome 3B, autosomal recessive (620536);Hematuria, benign familial, 2 (620320) (AD)	0.00104355	0.00309735	0.00272416	0.00142604	0.000786398	0.00189005	0.00140134	0.00149383	0.00417673	0.00692609	0.00371608	0.00454569	0.00138649	0.00530478	0.00541549	0.00399962	0.00624906	0.00865928	0.00379232	0.00750488	0.00187281	0.00629467	0.00724087	0.00537058	0.00104355	0.00309735	0.00272416	0.00142604	0.000786398	0.00189005	0.00140134	0.00149383	0.00417673	0.00692609	0.00371608	0.00454569	0.00138649	0.00530478	0.00541549	0.00399962	0.00624906	0.00865928	0.00379232
COL4A3	LOF	AD	COL4A3-AD	Unexplained kidney failure in young people	Kidney/Urinary System	Alport syndrome 3A, autosomal dominant (104200) (AD);Alport syndrome 3B, autosomal recessive (620536);Hematuria, benign familial, 2 (620320) (AD)	0.00104355	0.00309735	0.00272416	0.00142604	0.000786398	0.00189005	0.00140134	0.00149383	0.00417673	0.00692609	0.00371608	0.00454569	0.00138649	0.00530478	0.00541549	0.00399962	0.00624906	0.00865928	0.00379232	0.00750488	0.00187281	0.00629467	0.00724087	0.00537058	0.00104355	0.00309735	0.00272416	0.00142604	0.000786398	0.00189005	0.00140134	0.00149383	0.00417673	0.00692609	0.00371608	0.00454569	0.00138649	0.00530478	0.00541549	0.00399962	0.00624906	0.00865928	0.00379232
ASXL1	LOF	AD	ASXL1-AD	Fetal anomalies	Congenital/Developmental	Bohring-Opitz syndrome (605039) (AD);Myelodysplastic syndrome, somatic (614286);Bohring-Opitz syndrome (605039) (AD);Myelodysplastic syndrome, somatic (614286);Bohring-Opitz syndrome (605039) (AD);Myelodysplastic syndrome, somatic (614286);Bohring-Opitz syndrome (605039) (AD);Myelodysplastic syndrome, somatic (614286);Bohring-Opitz syndrome (605039) (AD);Myelodysplastic syndrome, somatic (614286)	0.00104258	0.000818145	0.000690174	0.00116577	0.00189243	0.00124288	0.000699676	0.000481464	0.00242726	0.00176294	0.00168441	0.00212448	0.00294936	0.00226318	0.00132576	0.00101963	0.00242726	0.00180757	0.00168441	0.00212448	0.00294936	0.00226318	0.00132576	0.00101963	0.00104258	0.000818145	0.000690174	0.00116577	0.00189243	0.00124288	0.000699676	0.000481464	0.00242726	0.00176294	0.00168441	0.00212448	0.00294936	0.00226318	0.00132576	0.00101963	0.00242726	0.00180757	0.00168441
ASXL1	LOF	AD	ASXL1-AD	Limb disorders	Skeletal/Connective Tissue	Bohring-Opitz syndrome (605039) (AD);Myelodysplastic syndrome, somatic (614286);Bohring-Opitz syndrome (605039) (AD);Myelodysplastic syndrome, somatic (614286);Bohring-Opitz syndrome (605039) (AD);Myelodysplastic syndrome, somatic (614286);Bohring-Opitz syndrome (605039) (AD);Myelodysplastic syndrome, somatic (614286);Bohring-Opitz syndrome (605039) (AD);Myelodysplastic syndrome, somatic (614286)	0.00104258	0.000818145	0.000690174	0.00116577	0.00189243	0.00124288	0.000699676	0.000481464	0.00242726	0.00176294	0.00168441	0.00212448	0.00294936	0.00226318	0.00132576	0.00101963	0.00242726	0.00180757	0.00168441	0.00212448	0.00294936	0.00226318	0.00132576	0.00101963	0.00104258	0.000818145	0.000690174	0.00116577	0.00189243	0.00124288	0.000699676	0.000481464	0.00242726	0.00176294	0.00168441	0.00212448	0.00294936	0.00226318	0.00132576	0.00101963	0.00242726	0.00180757	0.00168441
ASXL1	LOF	AD	ASXL1-AD	Severe Paediatric Disorders	Severe Paediatric Disorders	Bohring-Opitz syndrome (605039) (AD);Myelodysplastic syndrome, somatic (614286);Bohring-Opitz syndrome (605039) (AD);Myelodysplastic syndrome, somatic (614286);Bohring-Opitz syndrome (605039) (AD);Myelodysplastic syndrome, somatic (614286);Bohring-Opitz syndrome (605039) (AD);Myelodysplastic syndrome, somatic (614286);Bohring-Opitz syndrome (605039) (AD);Myelodysplastic syndrome, somatic (614286)	0.00104258	0.000818145	0.000690174	0.00116577	0.00189243	0.00124288	0.000699676	0.000481464	0.00242726	0.00176294	0.00168441	0.00212448	0.00294936	0.00226318	0.00132576	0.00101963	0.00242726	0.00180757	0.00168441	0.00212448	0.00294936	0.00226318	0.00132576	0.00101963	0.00104258	0.000818145	0.000690174	0.00116577	0.00189243	0.00124288	0.000699676	0.000481464	0.00242726	0.00176294	0.00168441	0.00212448	0.00294936	0.00226318	0.00132576	0.00101963	0.00242726	0.00180757	0.00168441
ASXL1	LOF	AD	ASXL1-AD	Arthrogryposis	Neuromuscular	Bohring-Opitz syndrome (605039) (AD);Myelodysplastic syndrome, somatic (614286);Bohring-Opitz syndrome (605039) (AD);Myelodysplastic syndrome, somatic (614286);Bohring-Opitz syndrome (605039) (AD);Myelodysplastic syndrome, somatic (614286);Bohring-Opitz syndrome (605039) (AD);Myelodysplastic syndrome, somatic (614286);Bohring-Opitz syndrome (605039) (AD);Myelodysplastic syndrome, somatic (614286)	0.00104258	0.000818145	0.000690174	0.00116577	0.00189243	0.00124288	0.000699676	0.000481464	0.00242726	0.00176294	0.00168441	0.00212448	0.00294936	0.00226318	0.00132576	0.00101963	0.00242726	0.00180757	0.00168441	0.00212448	0.00294936	0.00226318	0.00132576	0.00101963	0.00104258	0.000818145	0.000690174	0.00116577	0.00189243	0.00124288	0.000699676	0.000481464	0.00242726	0.00176294	0.00168441	0.00212448	0.00294936	0.00226318	0.00132576	0.00101963	0.00242726	0.00180757	0.00168441
ASXL1	LOF	AD	ASXL1-AD	Intellectual disability - microarray and sequencing	Neurological	Bohring-Opitz syndrome (605039) (AD);Myelodysplastic syndrome, somatic (614286);Bohring-Opitz syndrome (605039) (AD);Myelodysplastic syndrome, somatic (614286);Bohring-Opitz syndrome (605039) (AD);Myelodysplastic syndrome, somatic (614286);Bohring-Opitz syndrome (605039) (AD);Myelodysplastic syndrome, somatic (614286);Bohring-Opitz syndrome (605039) (AD);Myelodysplastic syndrome, somatic (614286)	0.00104258	0.000818145	0.000690174	0.00116577	0.00189243	0.00124288	0.000699676	0.000481464	0.00242726	0.00176294	0.00168441	0.00212448	0.00294936	0.00226318	0.00132576	0.00101963	0.00242726	0.00180757	0.00168441	0.00212448	0.00294936	0.00226318	0.00132576	0.00101963	0.00104258	0.000818145	0.000690174	0.00116577	0.00189243	0.00124288	0.000699676	0.000481464	0.00242726	0.00176294	0.00168441	0.00212448	0.00294936	0.00226318	0.00132576	0.00101963	0.00242726	0.00180757	0.00168441
LBR	LOF	AD	LBR-AD	Severe Paediatric Disorders	Severe Paediatric Disorders	?Reynolds syndrome (613471) (AD);Greenberg skeletal dysplasia (215140) (AR);Pelger-Huet anomaly (169400) (AD);Rhizomelic skeletal dysplasia with or without Pelger-Huet anomaly (618019) (AR)	0.00104257	4.47177e-05	7.69853e-05	0.000100758	3.86093e-05	0.000111721	9.27509e-05	0.00023892	0.00104257	0.000268358	0.000536485	0.000604427	0.000188435	0.000282711	0.000278928	0.000659905	0.00104257	0.000582061	0.000536485	0.00090658	0.000188435	0.000534601	0.000441653	0.0011384	0.00104257	4.47177e-05	7.69853e-05	0.000100758	3.86093e-05	0.000111721	9.27509e-05	0.00023892	0.00104257	0.000268358	0.000536485	0.000604427	0.000188435	0.000282711	0.000278928	0.000659905	0.00104257	0.000582061	0.000536485
LBR	LOF	AD	LBR-AD	Undiagnosed metabolic disorders	Metabolic	?Reynolds syndrome (613471) (AD);Greenberg skeletal dysplasia (215140) (AR);Pelger-Huet anomaly (169400) (AD);Rhizomelic skeletal dysplasia with or without Pelger-Huet anomaly (618019) (AR)	0.00104257	4.47177e-05	7.69853e-05	0.000100758	3.86093e-05	0.000111721	9.27509e-05	0.00023892	0.00104257	0.000268358	0.000536485	0.000604427	0.000188435	0.000282711	0.000278928	0.000659905	0.00104257	0.000582061	0.000536485	0.00090658	0.000188435	0.000534601	0.000441653	0.0011384	0.00104257	4.47177e-05	7.69853e-05	0.000100758	3.86093e-05	0.000111721	9.27509e-05	0.00023892	0.00104257	0.000268358	0.000536485	0.000604427	0.000188435	0.000282711	0.000278928	0.000659905	0.00104257	0.000582061	0.000536485
IFT140	LOF	AD	IFT140-AD	Cystic kidney disease	Kidney/Urinary System	Retinitis pigmentosa 80 (617781) (AR);Short-rib thoracic dysplasia 9 with or without polydactyly (266920) (AR)	0.00104064	0.0010822	0.00389507	0.000609023	7.53978e-05	0.00101035	0.00154225	0.000779607	0.0020841	0.00190025	0.00435373	0.00142916	0.000427162	0.00205197	0.00226745	0.00234477	0.0020841	0.00198953	0.00550958	0.00142916	0.000427162	0.00229072	0.0025247	0.00246401	0.00104064	0.0010822	0.00389507	0.000609023	7.53978e-05	0.00101035	0.00154225	0.000779607	0.0020841	0.00190025	0.00435373	0.00142916	0.000427162	0.00205197	0.00226745	0.00234477	0.0020841	0.00198953	0.00550958
GLRA1	LOF	AD	GLRA1-AD	DDG2P	Congenital/Developmental	Hyperekplexia 1 (149400) (AD, AR)	0.00104052	0.00111744	0	0.000503855	3.74385e-05	0.000377765	0.000255549	0.000478292	0.00104052	0.00151942	7.65199e-05	0.00115842	0.000187184	0.000788051	0.000811911	0.000777798	0.00242616	0.00227827	0.00206471	0.00171185	0.000336929	0.002323	0.0017615	0.00215052	0.00104052	0.00111744	0	0.000503855	3.74385e-05	0.000377765	0.000255549	0.000478292	0.00104052	0.00151942	7.65199e-05	0.00115842	0.000187184	0.000788051	0.000811911	0.000777798	0.00242616	0.00227827	0.00206471
GLRA1	LOF	AD	GLRA1-AD	Severe Paediatric Disorders	Severe Paediatric Disorders	Hyperekplexia 1 (149400) (AD, AR)	0.00104052	0.00111744	0	0.000503855	3.74385e-05	0.000377765	0.000255549	0.000478292	0.00104052	0.00151942	7.65199e-05	0.00115842	0.000187184	0.000788051	0.000811911	0.000777798	0.00242616	0.00227827	0.00206471	0.00171185	0.000336929	0.002323	0.0017615	0.00215052	0.00104052	0.00111744	0	0.000503855	3.74385e-05	0.000377765	0.000255549	0.000478292	0.00104052	0.00151942	7.65199e-05	0.00115842	0.000187184	0.000788051	0.000811911	0.000777798	0.00242616	0.00227827	0.00206471
GLRA1	LOF	AD	GLRA1-AD	Brain channelopathy	Neurological	Hyperekplexia 1 (149400) (AD, AR)	0.00104052	0.00111744	0	0.000503855	3.74385e-05	0.000377765	0.000255549	0.000478292	0.00104052	0.00151942	7.65199e-05	0.00115842	0.000187184	0.000788051	0.000811911	0.000777798	0.00242616	0.00227827	0.00206471	0.00171185	0.000336929	0.002323	0.0017615	0.00215052	0.00104052	0.00111744	0	0.000503855	3.74385e-05	0.000377765	0.000255549	0.000478292	0.00104052	0.00151942	7.65199e-05	0.00115842	0.000187184	0.000788051	0.000811911	0.000777798	0.00242616	0.00227827	0.00206471
GLRA1	LOF	AD	GLRA1-AD	Undiagnosed metabolic disorders	Metabolic	Hyperekplexia 1 (149400) (AD, AR)	0.00104052	0.00111744	0	0.000503855	3.74385e-05	0.000377765	0.000255549	0.000478292	0.00104052	0.00151942	7.65199e-05	0.00115842	0.000187184	0.000788051	0.000811911	0.000777798	0.00242616	0.00227827	0.00206471	0.00171185	0.000336929	0.002323	0.0017615	0.00215052	0.00104052	0.00111744	0	0.000503855	3.74385e-05	0.000377765	0.000255549	0.000478292	0.00104052	0.00151942	7.65199e-05	0.00115842	0.000187184	0.000788051	0.000811911	0.000777798	0.00242616	0.00227827	0.00206471
CLCN1	LOF	AD	CLCN1-AD	Skeletal Muscle Channelopathies	Neuromuscular	Myotonia congenita, dominant (160800) (AD);Myotonia congenita, recessive (255700) (AR);Myotonia levior (160800) (AD)	0.00104016	0.00343763	0.00397156	0.00130901	0.00548958	0.00437673	0.0016253	0.0024502	0.0034716	0.00440259	0.0040478	0.00388148	0.00720766	0.00558771	0.00422175	0.00352722	0.00633134	0.00605941	0.00412401	0.00780038	0.00739352	0.0070266	0.00659947	0.00614773	0.00104016	0.00343763	0.00397156	0.00130901	0.00548958	0.00437673	0.0016253	0.0024502	0.0034716	0.00440259	0.0040478	0.00388148	0.00720766	0.00558771	0.00422175	0.00352722	0.00633134	0.00605941	0.00412401
CHRND	LOF	AD	CHRND-AD	Severe Paediatric Disorders	Severe Paediatric Disorders	?Myasthenic syndrome, congenital, 3A, slow-channel (616321) (AD);?Myasthenic syndrome, congenital, 3C, associated with acetylcholine receptor deficiency (616323) (AR);Multiple pterygium syndrome, lethal type (253290) (AR);Myasthenic syndrome, congenital, 3B, fast-channel (616322) (AR)	0.00104004	0.000312988	0	0.000251863	0.00146755	0.000655395	0.000278205	0.000119753	0.00104004	0.00071525	0.000153075	0.000805794	0.00214098	0.00103463	0.000996601	0.000776774	0.00138636	0.00156395	0.000994354	0.00145997	0.00258922	0.00200988	0.0020847	0.00185081	0.00104004	0.000312988	0	0.000251863	0.00146755	0.000655395	0.000278205	0.000119753	0.00104004	0.00071525	0.000153075	0.000805794	0.00214098	0.00103463	0.000996601	0.000776774	0.00138636	0.00156395	0.000994354
CHRND	LOF	AD	CHRND-AD	Other rare neuromuscular disorders	Neuromuscular	?Myasthenic syndrome, congenital, 3A, slow-channel (616321) (AD);?Myasthenic syndrome, congenital, 3C, associated with acetylcholine receptor deficiency (616323) (AR);Multiple pterygium syndrome, lethal type (253290) (AR);Myasthenic syndrome, congenital, 3B, fast-channel (616322) (AR)	0.00104004	0.000312988	0	0.000251863	0.00146755	0.000655395	0.000278205	0.000119753	0.00104004	0.00071525	0.000153075	0.000805794	0.00214098	0.00103463	0.000996601	0.000776774	0.00138636	0.00156395	0.000994354	0.00145997	0.00258922	0.00200988	0.0020847	0.00185081	0.00104004	0.000312988	0	0.000251863	0.00146755	0.000655395	0.000278205	0.000119753	0.00104004	0.00071525	0.000153075	0.000805794	0.00214098	0.00103463	0.000996601	0.000776774	0.00138636	0.00156395	0.000994354
RAD51D	LOF	AD	RAD51D-AD	Familial breast cancer	Neoplasm	{Breast-ovarian cancer, familial, susceptibility to, 4} (614291)	0.00103992	0.000134149	0.000613721	0.00272651	3.74806e-05	0.000417901	0.000927641	0.000721587	0.00173244	0.00026829	0.000613721	0.00312965	3.74806e-05	0.000479264	0.00115927	0.000781308	0.00173244	0.00026829	0.000613721	0.00323082	3.74806e-05	0.000522179	0.0012297	0.000781308	0.00103992	0.000134149	0.000613721	0.00272651	3.74806e-05	0.000417901	0.000927641	0.000721587	0.00173244	0.00026829	0.000613721	0.00312965	3.74806e-05	0.000479264	0.00115927	0.000781308	0.00173244	0.00026829	0.000613721
EVC2	LOF	AD	EVC2-AD	Severe Paediatric Disorders	Severe Paediatric Disorders	Ellis-van Creveld syndrome (225500) (AR);Weyers acrofacial dysostosis (193530) (AD)	0.00103968	0.00184217	0.00503785	0.000956807	0.00116004	0.00148846	0.000974778	0.00131354	0.00207828	0.00251999	0.00519012	0.00191303	0.00359457	0.00205783	0.00176645	0.0019698	0.00207828	0.00251999	0.00519012	0.00191303	0.00359457	0.002074	0.00183594	0.00202941	0.00103968	0.00184217	0.00503785	0.000956807	0.00116004	0.00148846	0.000974778	0.00131354	0.00207828	0.00251999	0.00519012	0.00191303	0.00359457	0.00205783	0.00176645	0.0019698	0.00207828	0.00251999	0.00519012
RAG1	LOF	AD	RAG1-AD	Severe Paediatric Disorders	Severe Paediatric Disorders	Alpha/beta T-cell lymphopenia with gamma/delta T-cell expansion, severe cytomegalovirus infection, and autoimmunity (609889);Combined cellular and humoral immune defects with granulomas (233650) (AR);Omenn syndrome (603554) (AR);Severe combined immunodeficiency, B cell-negative (601457) (AR);Alpha/beta T-cell lymphopenia with gamma/delta T-cell expansion, severe cytomegalovirus infection, and aut…	0.00103968	0.00143002	0.000382541	0.000755397	0.000973379	0.00196208	0.00159858	0.00119403	0.001386	0.00183183	0.000611995	0.00166113	0.00146002	0.00242331	0.00236222	0.00179051	0.00415223	0.00428384	0.0070913	0.00347014	0.00213298	0.00473154	0.00384154	0.00333969	0.00103968	0.00143002	0.000382541	0.000755397	0.000973379	0.00196208	0.00159858	0.00119403	0.001386	0.00183183	0.000611995	0.00166113	0.00146002	0.00242331	0.00236222	0.00179051	0.00415223	0.00428384	0.0070913
AIRE	LOF	AD	AIRE-AD	Severe Paediatric Disorders	Severe Paediatric Disorders	Autoimmune polyendocrinopathy syndrome , type I, with or without reversible metaphyseal dysplasia (240300) (AD, AR)	0.00103968	0.000590809	0.000309283	0.00183875	0.0101847	0.00450764	0.000853233	0.000725067	0.00242472	0.000590809	0.000309283	0.00199193	0.0104302	0.00483666	0.00113565	0.000964114	0.00452777	0.00175137	0.000465185	0.00316481	0.024706	0.00794909	0.0035076	0.00258084	0.00103968	0.000590809	0.000309283	0.00183875	0.0101847	0.00450764	0.000853233	0.000725067	0.00242472	0.000590809	0.000309283	0.00199193	0.0104302	0.00483666	0.00113565	0.000964114	0.00452777	0.00175137	0.000465185
AIRE	LOF	AD	AIRE-AD	Autoimmune Polyendocrine Syndrome	Rheumatic	Autoimmune polyendocrinopathy syndrome , type I, with or without reversible metaphyseal dysplasia (240300) (AD, AR)	0.00103968	0.000590809	0.000309283	0.00183875	0.0101847	0.00450764	0.000853233	0.000725067	0.00242472	0.000590809	0.000309283	0.00199193	0.0104302	0.00483666	0.00113565	0.000964114	0.00452777	0.00175137	0.000465185	0.00316481	0.024706	0.00794909	0.0035076	0.00258084	0.00103968	0.000590809	0.000309283	0.00183875	0.0101847	0.00450764	0.000853233	0.000725067	0.00242472	0.000590809	0.000309283	0.00199193	0.0104302	0.00483666	0.00113565	0.000964114	0.00452777	0.00175137	0.000465185
AIRE	LOF	AD	AIRE-AD	COVID-19 research	Immune System/Infectious	Autoimmune polyendocrinopathy syndrome , type I, with or without reversible metaphyseal dysplasia (240300) (AD, AR)	0.00103968	0.000590809	0.000309283	0.00183875	0.0101847	0.00450764	0.000853233	0.000725067	0.00242472	0.000590809	0.000309283	0.00199193	0.0104302	0.00483666	0.00113565	0.000964114	0.00452777	0.00175137	0.000465185	0.00316481	0.024706	0.00794909	0.0035076	0.00258084	0.00103968	0.000590809	0.000309283	0.00183875	0.0101847	0.00450764	0.000853233	0.000725067	0.00242472	0.000590809	0.000309283	0.00199193	0.0104302	0.00483666	0.00113565	0.000964114	0.00452777	0.00175137	0.000465185
AIRE	LOF	AD	AIRE-AD	Retinal disorders	Eye	Autoimmune polyendocrinopathy syndrome , type I, with or without reversible metaphyseal dysplasia (240300) (AD, AR)	0.00103968	0.000590809	0.000309283	0.00183875	0.0101847	0.00450764	0.000853233	0.000725067	0.00242472	0.000590809	0.000309283	0.00199193	0.0104302	0.00483666	0.00113565	0.000964114	0.00452777	0.00175137	0.000465185	0.00316481	0.024706	0.00794909	0.0035076	0.00258084	0.00103968	0.000590809	0.000309283	0.00183875	0.0101847	0.00450764	0.000853233	0.000725067	0.00242472	0.000590809	0.000309283	0.00199193	0.0104302	0.00483666	0.00113565	0.000964114	0.00452777	0.00175137	0.000465185
AIRE	LOF	AD	AIRE-AD	Familial hypoparathyroidism	Endocrine	Autoimmune polyendocrinopathy syndrome , type I, with or without reversible metaphyseal dysplasia (240300) (AD, AR)	0.00103968	0.000590809	0.000309283	0.00183875	0.0101847	0.00450764	0.000853233	0.000725067	0.00242472	0.000590809	0.000309283	0.00199193	0.0104302	0.00483666	0.00113565	0.000964114	0.00452777	0.00175137	0.000465185	0.00316481	0.024706	0.00794909	0.0035076	0.00258084	0.00103968	0.000590809	0.000309283	0.00183875	0.0101847	0.00450764	0.000853233	0.000725067	0.00242472	0.000590809	0.000309283	0.00199193	0.0104302	0.00483666	0.00113565	0.000964114	0.00452777	0.00175137	0.000465185
EVC	LOF	AD	EVC-AD	Severe Paediatric Disorders	Severe Paediatric Disorders	?Weyers acrofacial dysostosis (193530) (AD);Ellis-van Creveld syndrome (225500) (AR)	0.00103968	0.000536507	0.000306362	0.000456006	0.000562258	0.00101107	0.000570242	0.000418101	0.00242472	0.00125182	0.000385718	0.000815074	0.000599677	0.00166496	0.00119691	0.00179339	0.00242472	0.00160346	0.000385718	0.00086542	0.000599677	0.00175118	0.00129058	0.00179339	0.00103968	0.000536507	0.000306362	0.000456006	0.000562258	0.00101107	0.000570242	0.000418101	0.00242472	0.00125182	0.000385718	0.000815074	0.000599677	0.00166496	0.00119691	0.00179339	0.00242472	0.00160346	0.000385718
HSPB1	LOF	AD	HSPB1-AD	Severe Paediatric Disorders	Severe Paediatric Disorders	Charcot-Marie-Tooth disease, axonal, type 2F (606595) (AD);Neuronopathy, distal hereditary motor, autosomal dominant 3 (608634) (AD)	0.000885739	0	0	0	0.00011373	0.000191491	0.000191568	0.00011971	0.00170234	0.00037081	0.00061638	0.0004541	0.000483378	0.000450758	0.000750498	0.000424639	0.00283175	0.00059449	0.000694723	0.00100949	0.000863279	0.000750731	0.00252987	0.000963439	0.000885739	0	0	0	0.00011373	0.000191491	0.000191568	0.00011971	0.00170234	0.00037081	0.00061638	0.0004541	0.000483378	0.000450758	0.000750498	0.000424639	0.00283175	0.00059449	0.000694723
HSPB1	LOF	AD	HSPB1-AD	Distal myopathies	Neuromuscular	Charcot-Marie-Tooth disease, axonal, type 2F (606595) (AD);Neuronopathy, distal hereditary motor, autosomal dominant 3 (608634) (AD)	0.000885739	0	0	0	0.00011373	0.000191491	0.000191568	0.00011971	0.00170234	0.00037081	0.00061638	0.0004541	0.000483378	0.000450758	0.000750498	0.000424639	0.00283175	0.00059449	0.000694723	0.00100949	0.000863279	0.000750731	0.00252987	0.000963439	0.000885739	0	0	0	0.00011373	0.000191491	0.000191568	0.00011971	0.00170234	0.00037081	0.00061638	0.0004541	0.000483378	0.000450758	0.000750498	0.000424639	0.00283175	0.00059449	0.000694723
HSPB1	LOF	AD	HSPB1-AD	Hereditary neuropathy	Neurological	Charcot-Marie-Tooth disease, axonal, type 2F (606595) (AD);Neuronopathy, distal hereditary motor, autosomal dominant 3 (608634) (AD)	0.000885739	0	0	0	0.00011373	0.000191491	0.000191568	0.00011971	0.00170234	0.00037081	0.00061638	0.0004541	0.000483378	0.000450758	0.000750498	0.000424639	0.00283175	0.00059449	0.000694723	0.00100949	0.000863279	0.000750731	0.00252987	0.000963439	0.000885739	0	0	0	0.00011373	0.000191491	0.000191568	0.00011971	0.00170234	0.00037081	0.00061638	0.0004541	0.000483378	0.000450758	0.000750498	0.000424639	0.00283175	0.00059449	0.000694723
CRYBB1	LOF	AD	CRYBB1-AD	Fetal anomalies	Congenital/Developmental	Cataract 17, multiple types (611544) (AD, AR)	0.000815671	0	0	0	0	1.25917e-05	2.32107e-05	5.98677e-05	0.00116207	0.000491805	0	0.000201534	0.000674385	0.00027885	6.96398e-05	0.000419189	0.00151322	0.000536501	0.000153034	0.000352626	0.00157238	0.000354368	0.000185557	0.0004789	0.000815671	0	0	0	0	1.25917e-05	2.32107e-05	5.98677e-05	0.00116207	0.000491805	0	0.000201534	0.000674385	0.00027885	6.96398e-05	0.000419189	0.00151322	0.000536501	0.000153034
CRYBB1	LOF	AD	CRYBB1-AD	Severe Paediatric Disorders	Severe Paediatric Disorders	Cataract 17, multiple types (611544) (AD, AR)	0.000815671	0	0	0	0	1.25917e-05	2.32107e-05	5.98677e-05	0.00116207	0.000491805	0	0.000201534	0.000674385	0.00027885	6.96398e-05	0.000419189	0.00151322	0.000536501	0.000153034	0.000352626	0.00157238	0.000354368	0.000185557	0.0004789	0.000815671	0	0	0	0	1.25917e-05	2.32107e-05	5.98677e-05	0.00116207	0.000491805	0	0.000201534	0.000674385	0.00027885	6.96398e-05	0.000419189	0.00151322	0.000536501	0.000153034
CRYBB1	LOF	AD	CRYBB1-AD	Bilateral congenital or childhood onset cataracts	Eye	Cataract 17, multiple types (611544) (AD, AR)	0.000815671	0	0	0	0	1.25917e-05	2.32107e-05	5.98677e-05	0.00116207	0.000491805	0	0.000201534	0.000674385	0.00027885	6.96398e-05	0.000419189	0.00151322	0.000536501	0.000153034	0.000352626	0.00157238	0.000354368	0.000185557	0.0004789	0.000815671	0	0	0	0	1.25917e-05	2.32107e-05	5.98677e-05	0.00116207	0.000491805	0	0.000201534	0.000674385	0.00027885	6.96398e-05	0.000419189	0.00151322	0.000536501	0.000153034
DMXL2	LOF	AD	DMXL2-AD	Monogenic hearing loss	Ear	?Deafness, autosomal dominant 71 (617605) (AD);?Polyendocrine-polyneuropathy syndrome (616113) (AR);Developmental and epileptic encephalopathy 81 (618663) (AR)	0.000791766	0.00148534	0.000157437	0.000259491	0.000114397	0.000173306	0.000605326	0.00050468	0.000791766	0.00215369	0.0013987	0.000727355	0.000716525	0.00117268	0.00137111	0.00125643	0.000791766	0.00289344	0.0013987	0.00077771	0.000716525	0.00130783	0.00139427	0.00125643	0.000791766	0.00148534	0.000157437	0.000259491	0.000114397	0.000173306	0.000605326	0.00050468	0.000791766	0.00215369	0.0013987	0.000727355	0.000716525	0.00117268	0.00137111	0.00125643	0.000791766	0.00289344	0.0013987
RDH12	LOF	AD	RDH12-AD	Retinal disorders	Eye	Leber congenital amaurosis 13 (612712) (AD, AR)	0.000751763	0.00285812	7.65199e-05	0.00100741	0.000198719	0.00156279	0.00111261	0.00161275	0.000751763	0.00308111	0.000153046	0.00110809	0.000236205	0.0017749	0.00139065	0.00459272	0.00144448	0.00392858	0.000688497	0.00347094	0.000574096	0.00275303	0.00245634	0.00542599	0.000751763	0.00285812	7.65199e-05	0.00100741	0.000198719	0.00156279	0.00111261	0.00161275	0.000751763	0.00308111	0.000153046	0.00110809	0.000236205	0.0017749	0.00139065	0.00459272	0.00144448	0.00392858	0.000688497
CDKN2A	LOF	AD	CDKN2A-AD	Melanoma pertinent cancer susceptibility	Neoplasm	{Melanoma and neural system tumor syndrome} (155755) (AD);{Melanoma-pancreatic cancer syndrome} (606719) (AD);{Melanoma, cutaneous malignant, 2} (155601) (AD)	0.000744726	0.000134838	0	0	0	0.000124187	4.64177e-05	5.98677e-05	0.00110192	0.000404228	0	0.000203507	0.000320953	0.000552303	0.000162469	0.000298941	0.00110192	0.000629597	7.6643e-05	0.000253876	0.000452742	0.000764955	0.000162469	0.000598015	0.000744726	0.000134838	0	0	0	0.000124187	4.64177e-05	5.98677e-05	0.00110192	0.000404228	0	0.000203507	0.000320953	0.000552303	0.000162469	0.000298941	0.00110192	0.000629597	7.6643e-05
CDKN2A	LOF	AD	CDKN2A-AD	Pigmentary skin disorders	Skin	{Melanoma and neural system tumor syndrome} (155755) (AD);{Melanoma-pancreatic cancer syndrome} (606719) (AD);{Melanoma, cutaneous malignant, 2} (155601) (AD)	0.000744726	0.000134838	0	0	0	0.000124187	4.64177e-05	5.98677e-05	0.00110192	0.000404228	0	0.000203507	0.000320953	0.000552303	0.000162469	0.000298941	0.00110192	0.000629597	7.6643e-05	0.000253876	0.000452742	0.000764955	0.000162469	0.000598015	0.000744726	0.000134838	0	0	0	0.000124187	4.64177e-05	5.98677e-05	0.00110192	0.000404228	0	0.000203507	0.000320953	0.000552303	0.000162469	0.000298941	0.00110192	0.000629597	7.6643e-05
PROM1	LOF	AD	PROM1-AD	Retinal disorders	Eye	Cone-rod dystrophy 12 (612657) (AD, AR);Macular dystrophy, retinal, 2 (608051) (AD);Retinitis pigmentosa 41 (612095) (AR);Stargardt disease 4 (603786) (AD)	0.000719424	0.00176312	0	0.000554535	0.000337714	0.0021726	0.000338253	0.000853479	0.00182264	0.00363252	0.000322223	0.00132816	0.000645736	0.00320116	0.0014814	0.0017054	0.00182264	0.00363252	0.000322223	0.00132816	0.000645736	0.00327938	0.00150488	0.00218541	0.000719424	0.00176312	0	0.000554535	0.000337714	0.0021726	0.000338253	0.000853479	0.00182264	0.00363252	0.000322223	0.00132816	0.000645736	0.00320116	0.0014814	0.0017054	0.00182264	0.00363252	0.000322223
RNF213	LOF	AD	RNF213-AD	Cerebral vascular malformations	Congenital/Developmental	{Moyamoya disease 2, susceptibility to} (607151) (AD, AR)	0.00071508	0.00176809	0.000535528	0.0027672	0.000582116	0.00112792	0.00496805	0.000792738	0.00510951	0.0055286	0.00240022	0.0169494	0.00228553	0.00339038	0.0102606	0.0152009	0.00579944	0.00584574	0.00240022	0.0172962	0.00232297	0.00364533	0.0106375	0.0152598	0.00071508	0.00176809	0.000535528	0.0027672	0.000582116	0.00112792	0.00496805	0.000792738	0.00510951	0.0055286	0.00240022	0.0169494	0.00228553	0.00339038	0.0102606	0.0152009	0.00579944	0.00584574	0.00240022
CPT1C	Both	AD	CPT1C-AD	Childhood onset hereditary spastic paraplegia	Neurological	?Spastic paraplegia 73, autosomal dominant (616282) (AD)	0.000714899	8.94454e-05	7.65199e-05	0.000302486	0.000150233	0.000356349	0.000400648	0.000179668	0.000714899	0.000251545	0.00015304	0.000604628	0.000501217	0.000567787	0.000777747	0.000299121	0.000714899	0.000251545	0.00015304	0.000707066	0.00465416	0.000629636	0.0010096	0.000358902	0.000714899	8.94454e-05	7.65199e-05	0.000302486	0.000150233	0.000356349	0.000400648	0.000179668	0.000714899	0.000251545	0.00015304	0.000604628	0.000501217	0.000567787	0.000777747	0.000299121	0.000714899	0.000251545	0.00015304
CRB1	LOF	AD	CRB1-AD	Severe Paediatric Disorders	Severe Paediatric Disorders	Leber congenital amaurosis 8 (613835) (AR);Pigmented paravenous chorioretinal atrophy (172870) (AD);Retinitis pigmentosa-12 (600105) (AR)	0.000698722	0.00165405	0.000306368	0.00216399	0.000299533	0.00211676	0.000953038	0.00155251	0.0031215	0.00281496	0.000691869	0.00402286	0.000449453	0.00413781	0.00268958	0.00363873	0.00415793	0.00433135	0.000928687	0.00557735	0.00153546	0.00490966	0.00585363	0.00471076	0.000698722	0.00165405	0.000306368	0.00216399	0.000299533	0.00211676	0.000953038	0.00155251	0.0031215	0.00281496	0.000691869	0.00402286	0.000449453	0.00413781	0.00268958	0.00363873	0.00415793	0.00433135	0.000928687
SYNE2	LOF	AD	SYNE2-AD	Limb girdle muscular dystrophies, myofibrillar myopathies and distal myopathies	Neuromuscular	Emery-Dreifuss muscular dystrophy 5, autosomal dominant (612999) (AD)	0.000698114	0.000357716	0.0002298	0.000856438	0.000262212	0.000601079	0.00084128	0.000298684	0.00104455	0.00296203	0.000551398	0.0024968	0.00178899	0.00201367	0.00227914	0.0110512	0.00420959	0.00403394	0.000857514	0.00511207	0.00201328	0.00277798	0.00290867	0.0115241	0.000698114	0.000357716	0.0002298	0.000856438	0.000262212	0.000601079	0.00084128	0.000298684	0.00104455	0.00296203	0.000551398	0.0024968	0.00178899	0.00201367	0.00227914	0.0110512	0.00420959	0.00403394	0.000857514
OPA3	LOF	AD	OPA3-AD	Severe Paediatric Disorders	Severe Paediatric Disorders	3-methylglutaconic aciduria, type III (258501) (AR);Optic atrophy 3 with cataract (165300) (AD)	0.00069735	0	7.65199e-05	0	3.74427e-05	1.08465e-05	9.27407e-05	0	0.00069735	0.000314153	7.65199e-05	0	3.74427e-05	0.000102603	0.000162344	0.000418383	0.00104439	0.00053813	0.000153298	0.000604542	0.000112977	0.000257358	0.000394153	0.000597529	0.00069735	0	7.65199e-05	0	3.74427e-05	1.08465e-05	9.27407e-05	0	0.00069735	0.000314153	7.65199e-05	0	3.74427e-05	0.000102603	0.000162344	0.000418383	0.00104439	0.00053813	0.000153298
OPA3	LOF	AD	OPA3-AD	Hereditary neuropathy	Neurological	3-methylglutaconic aciduria, type III (258501) (AR);Optic atrophy 3 with cataract (165300) (AD)	0.00069735	0	7.65199e-05	0	3.74427e-05	1.08465e-05	9.27407e-05	0	0.00069735	0.000314153	7.65199e-05	0	3.74427e-05	0.000102603	0.000162344	0.000418383	0.00104439	0.00053813	0.000153298	0.000604542	0.000112977	0.000257358	0.000394153	0.000597529	0.00069735	0	7.65199e-05	0	3.74427e-05	1.08465e-05	9.27407e-05	0	0.00069735	0.000314153	7.65199e-05	0	3.74427e-05	0.000102603	0.000162344	0.000418383	0.00104439	0.00053813	0.000153298
OPA3	LOF	AD	OPA3-AD	Possible mitochondrial disorder - nuclear genes	Mitochrondrial	3-methylglutaconic aciduria, type III (258501) (AR);Optic atrophy 3 with cataract (165300) (AD)	0.00069735	0	7.65199e-05	0	3.74427e-05	1.08465e-05	9.27407e-05	0	0.00069735	0.000314153	7.65199e-05	0	3.74427e-05	0.000102603	0.000162344	0.000418383	0.00104439	0.00053813	0.000153298	0.000604542	0.000112977	0.000257358	0.000394153	0.000597529	0.00069735	0	7.65199e-05	0	3.74427e-05	1.08465e-05	9.27407e-05	0	0.00069735	0.000314153	7.65199e-05	0	3.74427e-05	0.000102603	0.000162344	0.000418383	0.00104439	0.00053813	0.000153298
OPA3	LOF	AD	OPA3-AD	Undiagnosed metabolic disorders	Metabolic	3-methylglutaconic aciduria, type III (258501) (AR);Optic atrophy 3 with cataract (165300) (AD)	0.00069735	0	7.65199e-05	0	3.74427e-05	1.08465e-05	9.27407e-05	0	0.00069735	0.000314153	7.65199e-05	0	3.74427e-05	0.000102603	0.000162344	0.000418383	0.00104439	0.00053813	0.000153298	0.000604542	0.000112977	0.000257358	0.000394153	0.000597529	0.00069735	0	7.65199e-05	0	3.74427e-05	1.08465e-05	9.27407e-05	0	0.00069735	0.000314153	7.65199e-05	0	3.74427e-05	0.000102603	0.000162344	0.000418383	0.00104439	0.00053813	0.000153298
OPA3	LOF	AD	OPA3-AD	Bilateral congenital or childhood onset cataracts	Eye	3-methylglutaconic aciduria, type III (258501) (AR);Optic atrophy 3 with cataract (165300) (AD)	0.00069735	0	7.65199e-05	0	3.74427e-05	1.08465e-05	9.27407e-05	0	0.00069735	0.000314153	7.65199e-05	0	3.74427e-05	0.000102603	0.000162344	0.000418383	0.00104439	0.00053813	0.000153298	0.000604542	0.000112977	0.000257358	0.000394153	0.000597529	0.00069735	0	7.65199e-05	0	3.74427e-05	1.08465e-05	9.27407e-05	0	0.00069735	0.000314153	7.65199e-05	0	3.74427e-05	0.000102603	0.000162344	0.000418383	0.00104439	0.00053813	0.000153298
GUCY2C	Both	AD	GUCY2C-AD	Fetal anomalies	Congenital/Developmental	Diarrhea 6 (614616) (AD);Meconium ileus (614665) (AR)	0.000696379	0.000134686	0	0.000101505	0	0.000193839	0.000202567	6.14383e-05	0.00333258	0.00194351	7.93871e-05	0.00186725	0.000417222	0.00131098	0.00228483	0.00280139	0.00333258	0.00212964	7.93871e-05	0.00232021	0.000454681	0.00149124	0.00251657	0.00321947	0.000696379	0.000134686	0	0.000101505	0	0.000193839	0.000202567	6.14383e-05	0.00333258	0.00194351	7.93871e-05	0.00186725	0.000417222	0.00131098	0.00228483	0.00280139	0.00333258	0.00212964	7.93871e-05
GUCY2C	Both	AD	GUCY2C-AD	Severe Paediatric Disorders	Severe Paediatric Disorders	Diarrhea 6 (614616) (AD);Meconium ileus (614665) (AR)	0.000696379	0.000134686	0	0.000101505	0	0.000193839	0.000202567	6.14383e-05	0.00333258	0.00194351	7.93871e-05	0.00186725	0.000417222	0.00131098	0.00228483	0.00280139	0.00333258	0.00212964	7.93871e-05	0.00232021	0.000454681	0.00149124	0.00251657	0.00321947	0.000696379	0.000134686	0	0.000101505	0	0.000193839	0.000202567	6.14383e-05	0.00333258	0.00194351	7.93871e-05	0.00186725	0.000417222	0.00131098	0.00228483	0.00280139	0.00333258	0.00212964	7.93871e-05
GUCY2C	Both	AD	GUCY2C-AD	Primary immunodeficiency or monogenic inflammatory bowel disease	Immune System/Infectious	Diarrhea 6 (614616) (AD);Meconium ileus (614665) (AR)	0.000696379	0.000134686	0	0.000101505	0	0.000193839	0.000202567	6.14383e-05	0.00333258	0.00194351	7.93871e-05	0.00186725	0.000417222	0.00131098	0.00228483	0.00280139	0.00333258	0.00212964	7.93871e-05	0.00232021	0.000454681	0.00149124	0.00251657	0.00321947	0.000696379	0.000134686	0	0.000101505	0	0.000193839	0.000202567	6.14383e-05	0.00333258	0.00194351	7.93871e-05	0.00186725	0.000417222	0.00131098	0.00228483	0.00280139	0.00333258	0.00212964	7.93871e-05
GUCY2C	Both	AD	GUCY2C-AD	Infantile enterocolitis & monogenic inflammatory bowel disease	Gastrointestinal	Diarrhea 6 (614616) (AD);Meconium ileus (614665) (AR)	0.000696379	0.000134686	0	0.000101505	0	0.000193839	0.000202567	6.14383e-05	0.00333258	0.00194351	7.93871e-05	0.00186725	0.000417222	0.00131098	0.00228483	0.00280139	0.00333258	0.00212964	7.93871e-05	0.00232021	0.000454681	0.00149124	0.00251657	0.00321947	0.000696379	0.000134686	0	0.000101505	0	0.000193839	0.000202567	6.14383e-05	0.00333258	0.00194351	7.93871e-05	0.00186725	0.000417222	0.00131098	0.00228483	0.00280139	0.00333258	0.00212964	7.93871e-05
CRYGD	LOF	AD	CRYGD-AD	Severe Paediatric Disorders	Severe Paediatric Disorders	Cataract 4, multiple types (115700) (AD)	0.000696136	0	0	0	0	0	0	0	0.000696136	0.000625894	0	5.03766e-05	0	0.000267996	9.28327e-05	0.000179431	0.000696136	0.000731626	0	0.000626219	0	0.000324134	0.000208903	0.000240065	0.000696136	0	0	0	0	0	0	0	0.000696136	0.000625894	0	5.03766e-05	0	0.000267996	9.28327e-05	0.000179431	0.000696136	0.000731626	0
CRYGD	LOF	AD	CRYGD-AD	Bilateral congenital or childhood onset cataracts	Eye	Cataract 4, multiple types (115700) (AD)	0.000696136	0	0	0	0	0	0	0	0.000696136	0.000625894	0	5.03766e-05	0	0.000267996	9.28327e-05	0.000179431	0.000696136	0.000731626	0	0.000626219	0	0.000324134	0.000208903	0.000240065	0.000696136	0	0	0	0	0	0	0	0.000696136	0.000625894	0	5.03766e-05	0	0.000267996	9.28327e-05	0.000179431	0.000696136	0.000731626	0
CRYGD	LOF	AD	CRYGD-AD	Fetal anomalies	Congenital/Developmental	Cataract 4, multiple types (115700) (AD)	0.000696136	0	0	0	0	0	0	0	0.000696136	0.000625894	0	5.03766e-05	0	0.000267996	9.28327e-05	0.000179431	0.000696136	0.000731626	0	0.000626219	0	0.000324134	0.000208903	0.000240065	0.000696136	0	0	0	0	0	0	0	0.000696136	0.000625894	0	5.03766e-05	0	0.000267996	9.28327e-05	0.000179431	0.000696136	0.000731626	0
CNTNAP2	LOF	AD	CNTNAP2-AD	Severe Paediatric Disorders	Severe Paediatric Disorders	{Autism susceptibility 15} (612100);Pitt-Hopkins like syndrome 1 (610042) (AR)	0.000694446	0.000313042	0.000229601	0.000408431	0.000224645	0.000369081	0.000115962	0.000119517	0.000694446	0.000357748	0.000229601	0.000509148	0.000262075	0.000572818	0.000349848	0.000242534	0.000694446	0.000536603	0.000229601	0.000509148	0.000262075	0.000617822	0.000349848	0.000242534	0.000694446	0.000313042	0.000229601	0.000408431	0.000224645	0.000369081	0.000115962	0.000119517	0.000694446	0.000357748	0.000229601	0.000509148	0.000262075	0.000572818	0.000349848	0.000242534	0.000694446	0.000536603	0.000229601
LHCGR	Both	AD	LHCGR-AD	Disorders of sex development	Endocrine	Leydig cell adenoma, somatic, with precocious puberty (176410);Leydig cell hypoplasia with hypergonadotropic hypogonadism (238320) (AR);Leydig cell hypoplasia with pseudohermaphroditism (238320) (AR);Luteinizing hormone resistance, female (238320) (AR);Precocious puberty, male (176410) (AD)	0.000694444	0.000402387	7.68669e-05	0	0	0.000400714	0.000119286	0.000247904	0.000694444	0.000983496	0.000229889	0.00086391	0.000561629	0.00140288	0.00107002	0.000785915	0.00118732	0.00120684	0.00122709	0.000964576	0.00128877	0.00215049	0.00174572	0.00210604	0.000694444	0.000402387	7.68669e-05	0	0	0.000400714	0.000119286	0.000247904	0.000694444	0.000983496	0.000229889	0.00086391	0.000561629	0.00140288	0.00107002	0.000785915	0.00118732	0.00120684	0.00122709
FIG4	LOF	AD	FIG4-AD	Severe Paediatric Disorders	Severe Paediatric Disorders	?Polymicrogyria, bilateral temporooccipital (612691) (AR);Amyotrophic lateral sclerosis 11 (612577) (AD);Charcot-Marie-Tooth disease, type 4J (611228) (AR);Yunis-Varon syndrome (216340) (AR)	0.000694444	0.00318152	0	0.00156156	0.000564599	0.00545535	0.000673012	0.000838088	0.00209218	0.00402895	0	0.00338145	0.000602306	0.00614534	0.00216922	0.00137656	0.00209218	0.00429622	7.84899e-05	0.00378433	0.000752134	0.0067375	0.00230953	0.00173585	0.000694444	0.00318152	0	0.00156156	0.000564599	0.00545535	0.000673012	0.000838088	0.00209218	0.00402895	0	0.00338145	0.000602306	0.00614534	0.00216922	0.00137656	0.00209218	0.00429622	7.84899e-05
FIG4	LOF	AD	FIG4-AD	Amyotrophic lateral sclerosis/motor neuron disease	Neuromuscular	?Polymicrogyria, bilateral temporooccipital (612691) (AR);Amyotrophic lateral sclerosis 11 (612577) (AD);Charcot-Marie-Tooth disease, type 4J (611228) (AR);Yunis-Varon syndrome (216340) (AR)	0.000694444	0.00318152	0	0.00156156	0.000564599	0.00545535	0.000673012	0.000838088	0.00209218	0.00402895	0	0.00338145	0.000602306	0.00614534	0.00216922	0.00137656	0.00209218	0.00429622	7.84899e-05	0.00378433	0.000752134	0.0067375	0.00230953	0.00173585	0.000694444	0.00318152	0	0.00156156	0.000564599	0.00545535	0.000673012	0.000838088	0.00209218	0.00402895	0	0.00338145	0.000602306	0.00614534	0.00216922	0.00137656	0.00209218	0.00429622	7.84899e-05
FIG4	LOF	AD	FIG4-AD	Hereditary neuropathy	Neurological	?Polymicrogyria, bilateral temporooccipital (612691) (AR);Amyotrophic lateral sclerosis 11 (612577) (AD);Charcot-Marie-Tooth disease, type 4J (611228) (AR);Yunis-Varon syndrome (216340) (AR)	0.000694444	0.00318152	0	0.00156156	0.000564599	0.00545535	0.000673012	0.000838088	0.00209218	0.00402895	0	0.00338145	0.000602306	0.00614534	0.00216922	0.00137656	0.00209218	0.00429622	7.84899e-05	0.00378433	0.000752134	0.0067375	0.00230953	0.00173585	0.000694444	0.00318152	0	0.00156156	0.000564599	0.00545535	0.000673012	0.000838088	0.00209218	0.00402895	0	0.00338145	0.000602306	0.00614534	0.00216922	0.00137656	0.00209218	0.00429622	7.84899e-05
SPTA1	LOF	AD	SPTA1-AD	Severe Paediatric Disorders	Severe Paediatric Disorders	Elliptocytosis-2 (130600) (AD);Pyropoikilocytosis (266140) (AR);Spherocytosis, type 3 (270970) (AR)	0.000693962	0.00298887	0.000306651	0.000352661	0.00185934	0.0180959	0.000416515	0.00620558	0.00104161	0.0040142	0.000798688	0.00129436	0.00227938	0.020123	0.00142125	0.00907122	0.00104161	0.00419235	0.000876041	0.00139504	0.00227938	0.0202892	0.00146778	0.00925289	0.000693962	0.00298887	0.000306651	0.000352661	0.00185934	0.0180959	0.000416515	0.00620558	0.00104161	0.0040142	0.000798688	0.00129436	0.00227938	0.020123	0.00142125	0.00907122	0.00104161	0.00419235	0.000876041
SPTA1	LOF	AD	SPTA1-AD	Cytopenias and congenital anaemias	Hematologic	Elliptocytosis-2 (130600) (AD);Pyropoikilocytosis (266140) (AR);Spherocytosis, type 3 (270970) (AR)	0.000693962	0.00298887	0.000306651	0.000352661	0.00185934	0.0180959	0.000416515	0.00620558	0.00104161	0.0040142	0.000798688	0.00129436	0.00227938	0.020123	0.00142125	0.00907122	0.00104161	0.00419235	0.000876041	0.00139504	0.00227938	0.0202892	0.00146778	0.00925289	0.000693962	0.00298887	0.000306651	0.000352661	0.00185934	0.0180959	0.000416515	0.00620558	0.00104161	0.0040142	0.000798688	0.00129436	0.00227938	0.020123	0.00142125	0.00907122	0.00104161	0.00419235	0.000876041
ELP1	LOF	AD	ELP1-AD	Childhood solid tumours	Neoplasm	{Medulloblastoma} (155255) (AD, AR, SMu);Dysautonomia, familial (223900) (AR);{Medulloblastoma} (155255) (AD, AR, SMu);Dysautonomia, familial (223900) (AR);{Medulloblastoma} (155255) (AD, AR, SMu);Dysautonomia, familial (223900) (AR);{Medulloblastoma} (155255) (AD, AR, SMu);Dysautonomia, familial (223900) (AR)	0.000693962	0.00116211	0.000306302	0.000604577	0.000262142	0.000583051	0.000672611	0.000477994	0.00154941	0.00187666	0.0304671	0.00131102	0.00123719	0.00144836	0.00176256	0.00114213	0.00154941	0.00192145	0.0306896	0.00131102	0.00123719	0.00151728	0.00178576	0.00241266	0.000693962	0.00116211	0.000306302	0.000604577	0.000262142	0.000583051	0.000672611	0.000477994	0.00154941	0.00187666	0.0304671	0.00131102	0.00123719	0.00144836	0.00176256	0.00114213	0.00154941	0.00192145	0.0306896
NTRK1	LOF	AD	NTRK1-AD	Severe Paediatric Disorders	Severe Paediatric Disorders	Insensitivity to pain, congenital, with anhidrosis (256800) (AR)	0.000693843	0.000312982	7.65374e-05	0.00337581	0.000459086	0.000345629	0.000210931	5.97389e-05	0.00174205	0.000701935	7.65374e-05	0.00403385	0.000615796	0.000676855	0.000690864	0.000361897	0.00278112	0.00152201	0.000306309	0.00503696	0.000842978	0.00113723	0.00149702	0.000839807	0.000693843	0.000312982	7.65374e-05	0.00337581	0.000459086	0.000345629	0.000210931	5.97389e-05	0.00174205	0.000701935	7.65374e-05	0.00403385	0.000615796	0.000676855	0.000690864	0.000361897	0.00278112	0.00152201	0.000306309
LPL	LOF	AD	LPL-AD	Severe Paediatric Disorders	Severe Paediatric Disorders	[High density lipoprotein cholesterol level QTL 11] (238600) (AR);Combined hyperlipidemia, familial (144250) (AD);Lipoprotein lipase deficiency (238600) (AR)	0.000693722	0.00107342	0	0.0017114	0.000187181	0.000846956	0.000649307	0.00023892	0.00277056	0.00236878	0.00068855	0.00321901	0.000224613	0.00212932	0.00157617	0.00238695	0.00311628	0.00263711	0.000765017	0.00347006	0.000374336	0.00223722	0.00208535	0.00363828	0.000693722	0.00107342	0	0.0017114	0.000187181	0.000846956	0.000649307	0.00023892	0.00277056	0.00236878	0.00068855	0.00321901	0.000224613	0.00212932	0.00157617	0.00238695	0.00311628	0.00263711	0.000765017
LPL	LOF	AD	LPL-AD	Severe hypertriglyceridaemia	Metabolic	[High density lipoprotein cholesterol level QTL 11] (238600) (AR);Combined hyperlipidemia, familial (144250) (AD);Lipoprotein lipase deficiency (238600) (AR)	0.000693722	0.00107342	0	0.0017114	0.000187181	0.000846956	0.000649307	0.00023892	0.00277056	0.00236878	0.00068855	0.00321901	0.000224613	0.00212932	0.00157617	0.00238695	0.00311628	0.00263711	0.000765017	0.00347006	0.000374336	0.00223722	0.00208535	0.00363828	0.000693722	0.00107342	0	0.0017114	0.000187181	0.000846956	0.000649307	0.00023892	0.00277056	0.00236878	0.00068855	0.00321901	0.000224613	0.00212932	0.00157617	0.00238695	0.00311628	0.00263711	0.000765017
CCDC50	LOF	AD	CCDC50-AD	Monogenic hearing loss	Ear	?Deafness, autosomal dominant 44 (607453) (AD)	0.000693722	0.000134263	0	0.000403104	0	0.000203246	0.0019923	0.00023907	0.00106639	0.000496804	0.000482039	0.00141338	0	0.00205774	0.00326023	0.00123891	0.00106639	0.000496804	0.000482039	0.00146378	0	0.00207212	0.00326023	0.00123891	0.000693722	0.000134263	0	0.000403104	0	0.000203246	0.0019923	0.00023907	0.00106639	0.000496804	0.000482039	0.00141338	0	0.00205774	0.00326023	0.00123891	0.00106639	0.000496804	0.000482039
COL9A1	LOF	AD	COL9A1-AD	Fetal anomalies	Congenital/Developmental	?Epiphyseal dysplasia, multiple, 6 (614135) (AD);Stickler syndrome, type IV (614134) (AR)	0.000693722	0.000357978	0.000459764	0.000352672	0.000149848	0.00129189	0.000210413	0.000358684	0.00104016	0.000849852	0.000612916	0.00141085	0.000450507	0.00206722	0.00153549	0.00143353	0.00104016	0.000983909	0.000612916	0.00141085	0.000450507	0.00210851	0.00155864	0.0014932	0.000693722	0.000357978	0.000459764	0.000352672	0.000149848	0.00129189	0.000210413	0.000358684	0.00104016	0.000849852	0.000612916	0.00141085	0.000450507	0.00206722	0.00153549	0.00143353	0.00104016	0.000983909	0.000612916
COL9A1	LOF	AD	COL9A1-AD	Skeletal dysplasia	Skeletal/Connective Tissue	?Epiphyseal dysplasia, multiple, 6 (614135) (AD);Stickler syndrome, type IV (614134) (AR)	0.000693722	0.000357978	0.000459764	0.000352672	0.000149848	0.00129189	0.000210413	0.000358684	0.00104016	0.000849852	0.000612916	0.00141085	0.000450507	0.00206722	0.00153549	0.00143353	0.00104016	0.000983909	0.000612916	0.00141085	0.000450507	0.00210851	0.00155864	0.0014932	0.000693722	0.000357978	0.000459764	0.000352672	0.000149848	0.00129189	0.000210413	0.000358684	0.00104016	0.000849852	0.000612916	0.00141085	0.000450507	0.00206722	0.00153549	0.00143353	0.00104016	0.000983909	0.000612916
COL9A1	LOF	AD	COL9A1-AD	Severe Paediatric Disorders	Severe Paediatric Disorders	?Epiphyseal dysplasia, multiple, 6 (614135) (AD);Stickler syndrome, type IV (614134) (AR)	0.000693722	0.000357978	0.000459764	0.000352672	0.000149848	0.00129189	0.000210413	0.000358684	0.00104016	0.000849852	0.000612916	0.00141085	0.000450507	0.00206722	0.00153549	0.00143353	0.00104016	0.000983909	0.000612916	0.00141085	0.000450507	0.00210851	0.00155864	0.0014932	0.000693722	0.000357978	0.000459764	0.000352672	0.000149848	0.00129189	0.000210413	0.000358684	0.00104016	0.000849852	0.000612916	0.00141085	0.000450507	0.00206722	0.00153549	0.00143353	0.00104016	0.000983909	0.000612916
CYP11B2	LOF	AD	CYP11B2-AD	Extreme early-onset hypertension	Cardiovascular	{Low renin hypertension, susceptibility to};Aldosterone to renin ratio raised;Hypoaldosteronism, congenital, due to CMO I deficiency (203400) (AR);Hypoaldosteronism, congenital, due to CMO II deficiency (610600) (AR)	0.000693602	0.000491869	0	0.000403015	0.000187241	0.000503522	0.000718708	0.000299804	0.00139168	0.000849563	7.6555e-05	0.000555052	0.000524106	0.00148365	0.00136834	0.000598363	0.00139168	0.000983602	7.6555e-05	0.000605408	0.000524106	0.00149802	0.00173896	0.000598363	0.000693602	0.000491869	0	0.000403015	0.000187241	0.000503522	0.000718708	0.000299804	0.00139168	0.000849563	7.6555e-05	0.000555052	0.000524106	0.00148365	0.00136834	0.000598363	0.00139168	0.000983602	7.6555e-05
TBC1D1	LOF	AD	TBC1D1-AD	CAKUT	Kidney/Urinary System	-	0.000693481	0.000227218	0.000153134	0.000352855	7.48783e-05	0.000282882	0.000188859	0.00101519	0.00210723	0.00145564	0.000306986	0.0011341	0.000390834	0.00107968	0.000879728	0.00251346	0.00279985	0.00150098	0.000384245	0.0014888	0.000390834	0.00125643	0.00157826	0.00257311	0.000693481	0.000227218	0.000153134	0.000352855	7.48783e-05	0.000282882	0.000188859	0.00101519	0.00210723	0.00145564	0.000306986	0.0011341	0.000390834	0.00107968	0.000879728	0.00251346	0.00279985	0.00150098	0.000384245
SH3TC2	LOF	AD	SH3TC2-AD	Severe Paediatric Disorders	Severe Paediatric Disorders	Charcot-Marie-Tooth disease, type 4C (601596) (AR);Mononeuropathy of the median nerve, mild (613353) (AD)	0.000693481	0.000625878	0.000153034	0.000605505	0.00104862	0.00334515	0.0024788	0.00125378	0.00208141	0.00130104	0.000229542	0.00131028	0.00194717	0.00385421	0.00326495	0.00328413	0.00242749	0.00139036	0.000229542	0.00251703	0.00198461	0.00411419	0.00351913	0.00328413	0.000693481	0.000625878	0.000153034	0.000605505	0.00104862	0.00334515	0.0024788	0.00125378	0.00208141	0.00130104	0.000229542	0.00131028	0.00194717	0.00385421	0.00326495	0.00328413	0.00242749	0.00139036	0.000229542
SH3TC2	LOF	AD	SH3TC2-AD	Hereditary neuropathy	Neurological	Charcot-Marie-Tooth disease, type 4C (601596) (AR);Mononeuropathy of the median nerve, mild (613353) (AD)	0.000693481	0.000625878	0.000153034	0.000605505	0.00104862	0.00334515	0.0024788	0.00125378	0.00208141	0.00130104	0.000229542	0.00131028	0.00194717	0.00385421	0.00326495	0.00328413	0.00242749	0.00139036	0.000229542	0.00251703	0.00198461	0.00411419	0.00351913	0.00328413	0.000693481	0.000625878	0.000153034	0.000605505	0.00104862	0.00334515	0.0024788	0.00125378	0.00208141	0.00130104	0.000229542	0.00131028	0.00194717	0.00385421	0.00326495	0.00328413	0.00242749	0.00139036	0.000229542
ERCC6	LOF	AD	ERCC6-AD	Severe Paediatric Disorders	Severe Paediatric Disorders	?De Sanctis-Cacchione syndrome (278800) (AR);{Lung cancer, susceptibility to} (211980) (AD, SMu);{Macular degeneration, age-related, susceptibility to, 5} (613761);Cerebrooculofacioskeletal syndrome 1 (214150) (AR);Cockayne syndrome, type B (133540) (AR);Premature ovarian failure 11 (616946) (AD);UV-sensitive syndrome 1 (600630) (AR);?De Sanctis-Cacchione syndrome (278800) (AR);{Lung cancer, susc…	0.000693481	0.00111746	0	0.000655109	0.00269294	0.00233324	0.000788167	0.0017912	0.00103992	0.00236749	7.66783e-05	0.00141028	0.00358896	0.0038551	0.00150665	0.00306918	0.00103992	0.00267976	0.000459219	0.0015109	0.00366358	0.00439791	0.0016224	0.00342648	0.000693481	0.00111746	0	0.000655109	0.00269294	0.00233324	0.000788167	0.0017912	0.00103992	0.00236749	7.66783e-05	0.00141028	0.00358896	0.0038551	0.00150665	0.00306918	0.00103992	0.00267976	0.000459219
MME	LOF	AD	MME-AD	Hereditary neuropathy	Neurological	?Spinocerebellar ataxia 43 (617018) (AD);Charcot-Marie-Tooth disease, axonal, type 2T (617017) (AD, AR)	0.000693361	0.00183449	0.00137706	0.000656492	0.000112341	0.00157826	0.000140036	0.000841613	0.00173975	0.00205774	0.00137706	0.00177607	0.000225129	0.00200993	0.000534672	0.001499	0.00208631	0.00286123	0.00137706	0.00213007	0.000412365	0.0026161	0.000812943	0.00179748	0.000693361	0.00183449	0.00137706	0.000656492	0.000112341	0.00157826	0.000140036	0.000841613	0.00173975	0.00205774	0.00137706	0.00177607	0.000225129	0.00200993	0.000534672	0.001499	0.00208631	0.00286123	0.00137706
ALPL	LOF	AD	ALPL-AD	Skeletal dysplasia	Skeletal/Connective Tissue	Hypophosphatasia, adult (146300) (AD, AR);Hypophosphatasia, childhood (241510) (AR);Hypophosphatasia, infantile (241500) (AR);Odontohypophosphatasia (146300) (AD, AR)	0.000693361	0.00232295	0.000841432	0.00685451	0.0325937	0.00549941	0.00120508	0.00173096	0.0017328	0.00281693	0.00107079	0.00900517	0.0335635	0.00822711	0.00211062	0.00250595	0.00207888	0.00375764	0.00130046	0.00955417	0.0341942	0.00992521	0.00264264	0.00334094	0.000693361	0.00232295	0.000841432	0.00685451	0.0325937	0.00549941	0.00120508	0.00173096	0.0017328	0.00281693	0.00107079	0.00900517	0.0335635	0.00822711	0.00211062	0.00250595	0.00207888	0.00375764	0.00130046
ALPL	LOF	AD	ALPL-AD	Severe Paediatric Disorders	Severe Paediatric Disorders	Hypophosphatasia, adult (146300) (AD, AR);Hypophosphatasia, childhood (241510) (AR);Hypophosphatasia, infantile (241500) (AR);Odontohypophosphatasia (146300) (AD, AR)	0.000693361	0.00232295	0.000841432	0.00685451	0.0325937	0.00549941	0.00120508	0.00173096	0.0017328	0.00281693	0.00107079	0.00900517	0.0335635	0.00822711	0.00211062	0.00250595	0.00207888	0.00375764	0.00130046	0.00955417	0.0341942	0.00992521	0.00264264	0.00334094	0.000693361	0.00232295	0.000841432	0.00685451	0.0325937	0.00549941	0.00120508	0.00173096	0.0017328	0.00281693	0.00107079	0.00900517	0.0335635	0.00822711	0.00211062	0.00250595	0.00207888	0.00375764	0.00130046
ALPL	LOF	AD	ALPL-AD	Undiagnosed metabolic disorders	Metabolic	Hypophosphatasia, adult (146300) (AD, AR);Hypophosphatasia, childhood (241510) (AR);Hypophosphatasia, infantile (241500) (AR);Odontohypophosphatasia (146300) (AD, AR)	0.000693361	0.00232295	0.000841432	0.00685451	0.0325937	0.00549941	0.00120508	0.00173096	0.0017328	0.00281693	0.00107079	0.00900517	0.0335635	0.00822711	0.00211062	0.00250595	0.00207888	0.00375764	0.00130046	0.00955417	0.0341942	0.00992521	0.00264264	0.00334094	0.000693361	0.00232295	0.000841432	0.00685451	0.0325937	0.00549941	0.00120508	0.00173096	0.0017328	0.00281693	0.00107079	0.00900517	0.0335635	0.00822711	0.00211062	0.00250595	0.00207888	0.00375764	0.00130046
ALPL	LOF	AD	ALPL-AD	Fetal anomalies	Congenital/Developmental	Hypophosphatasia, adult (146300) (AD, AR);Hypophosphatasia, childhood (241510) (AR);Hypophosphatasia, infantile (241500) (AR);Odontohypophosphatasia (146300) (AD, AR)	0.000693361	0.00232295	0.000841432	0.00685451	0.0325937	0.00549941	0.00120508	0.00173096	0.0017328	0.00281693	0.00107079	0.00900517	0.0335635	0.00822711	0.00211062	0.00250595	0.00207888	0.00375764	0.00130046	0.00955417	0.0341942	0.00992521	0.00264264	0.00334094	0.000693361	0.00232295	0.000841432	0.00685451	0.0325937	0.00549941	0.00120508	0.00173096	0.0017328	0.00281693	0.00107079	0.00900517	0.0335635	0.00822711	0.00211062	0.00250595	0.00207888	0.00375764	0.00130046
DSP	LOF	AD	DSP-AD	Palmoplantar keratoderma and erythrokeratodermas	Skin	Arrhythmogenic right ventricular dysplasia 8 (607450) (AD);Cardiomyopathy, dilated, with woolly hair and keratoderma (605676) (AR);Dilated cardiomyopathy with woolly hair, keratoderma, and tooth agenesis (615821) (AD);Epidermolysis bullosa, lethal acantholytic (609638) (AR);Keratosis palmoplantaris striata II (612908) (AD)	0.000693361	0.000635198	0.000764959	0.000251878	0.00108523	0.000395623	0.000278238	0.000418098	0.00185376	0.000903309	0.00084142	0.000663114	0.00130966	0.000742606	0.000556385	0.000777148	0.00185376	0.00108202	0.00084142	0.000763841	0.00130966	0.000796526	0.000579721	0.00107599	0.000693361	0.000635198	0.000764959	0.000251878	0.00108523	0.000395623	0.000278238	0.000418098	0.00185376	0.000903309	0.00084142	0.000663114	0.00130966	0.000742606	0.000556385	0.000777148	0.00185376	0.00108202	0.00084142
DSP	LOF	AD	DSP-AD	DDG2P	Congenital/Developmental	Arrhythmogenic right ventricular dysplasia 8 (607450) (AD);Cardiomyopathy, dilated, with woolly hair and keratoderma (605676) (AR);Dilated cardiomyopathy with woolly hair, keratoderma, and tooth agenesis (615821) (AD);Epidermolysis bullosa, lethal acantholytic (609638) (AR);Keratosis palmoplantaris striata II (612908) (AD)	0.000693361	0.000635198	0.000764959	0.000251878	0.00108523	0.000395623	0.000278238	0.000418098	0.00185376	0.000903309	0.00084142	0.000663114	0.00130966	0.000742606	0.000556385	0.000777148	0.00185376	0.00108202	0.00084142	0.000763841	0.00130966	0.000796526	0.000579721	0.00107599	0.000693361	0.000635198	0.000764959	0.000251878	0.00108523	0.000395623	0.000278238	0.000418098	0.00185376	0.000903309	0.00084142	0.000663114	0.00130966	0.000742606	0.000556385	0.000777148	0.00185376	0.00108202	0.00084142
DSP	LOF	AD	DSP-AD	Severe Paediatric Disorders	Severe Paediatric Disorders	Arrhythmogenic right ventricular dysplasia 8 (607450) (AD);Cardiomyopathy, dilated, with woolly hair and keratoderma (605676) (AR);Dilated cardiomyopathy with woolly hair, keratoderma, and tooth agenesis (615821) (AD);Epidermolysis bullosa, lethal acantholytic (609638) (AR);Keratosis palmoplantaris striata II (612908) (AD)	0.000693361	0.000635198	0.000764959	0.000251878	0.00108523	0.000395623	0.000278238	0.000418098	0.00185376	0.000903309	0.00084142	0.000663114	0.00130966	0.000742606	0.000556385	0.000777148	0.00185376	0.00108202	0.00084142	0.000763841	0.00130966	0.000796526	0.000579721	0.00107599	0.000693361	0.000635198	0.000764959	0.000251878	0.00108523	0.000395623	0.000278238	0.000418098	0.00185376	0.000903309	0.00084142	0.000663114	0.00130966	0.000742606	0.000556385	0.000777148	0.00185376	0.00108202	0.00084142
DSP	LOF	AD	DSP-AD	Arrhythmogenic right ventricular cardiomyopathy	Cardiovascular	Arrhythmogenic right ventricular dysplasia 8 (607450) (AD);Cardiomyopathy, dilated, with woolly hair and keratoderma (605676) (AR);Dilated cardiomyopathy with woolly hair, keratoderma, and tooth agenesis (615821) (AD);Epidermolysis bullosa, lethal acantholytic (609638) (AR);Keratosis palmoplantaris striata II (612908) (AD)	0.000693361	0.000635198	0.000764959	0.000251878	0.00108523	0.000395623	0.000278238	0.000418098	0.00185376	0.000903309	0.00084142	0.000663114	0.00130966	0.000742606	0.000556385	0.000777148	0.00185376	0.00108202	0.00084142	0.000763841	0.00130966	0.000796526	0.000579721	0.00107599	0.000693361	0.000635198	0.000764959	0.000251878	0.00108523	0.000395623	0.000278238	0.000418098	0.00185376	0.000903309	0.00084142	0.000663114	0.00130966	0.000742606	0.000556385	0.000777148	0.00185376	0.00108202	0.00084142
GUCY2D	LOF	AD	GUCY2D-AD	Retinal disorders	Eye	?Choroidal dystrophy, central areolar 1 (215500) (AD);Cone-rod dystrophy 6 (601777) (AD, AR);Leber congenital amaurosis 1 (204000) (AR);Night blindness, congenital stationary, type 1I (618555) (AR)	0.000693361	0.000417809	0.000153535	0.000252352	0.00843995	0.00134459	0.000262987	0.00031125	0.00242761	0.00101228	0.000153535	0.00112251	0.00866594	0.00241705	0.00135427	0.00136312	0.00348724	0.00148882	0.000995101	0.00207473	0.00870307	0.00291218	0.00186395	0.00262108	0.000693361	0.000417809	0.000153535	0.000252352	0.00843995	0.00134459	0.000262987	0.00031125	0.00242761	0.00101228	0.000153535	0.00112251	0.00866594	0.00241705	0.00135427	0.00136312	0.00348724	0.00148882	0.000995101
RDH5	LOF	AD	RDH5-AD	Retinal disorders	Eye	Fundus albipunctatus (136880) (AD, AR);Fundus albipunctatus (136880) (AD, AR);Fundus albipunctatus (136880) (AD, AR);Fundus albipunctatus (136880) (AD, AR)	0.000693361	0.003037	0.000153046	0.00130906	0.000273753	0.00128708	0.00041731	0.000477822	0.00173256	0.00352745	0.00297995	0.00236505	0.00038935	0.00186178	0.00162241	0.00101506	0.00346175	0.00432923	0.00313255	0.0032694	0.000502102	0.00279129	0.00268684	0.00202904	0.000693361	0.003037	0.000153046	0.00130906	0.000273753	0.00128708	0.00041731	0.000477822	0.00173256	0.00352745	0.00297995	0.00236505	0.00038935	0.00186178	0.00162241	0.00101506	0.00346175	0.00432923	0.00313255
POLG	LOF	AD	POLG-AD	Severe Paediatric Disorders	Severe Paediatric Disorders	Mitochondrial DNA depletion syndrome 4A (Alpers type) (203700) (AR);Mitochondrial DNA depletion syndrome 4B (MNGIE type) (613662) (AR);Mitochondrial recessive ataxia syndrome (includes SANDO and SCAE) (607459) (AR);Progressive external ophthalmoplegia, autosomal dominant 1 (157640) (AD);Progressive external ophthalmoplegia, autosomal recessive 1 (258450) (AR)	0.000693241	0.00209964	0.00221672	0.00110787	0.0137691	0.0106803	0.00208524	0.00589865	0.00760771	0.00536923	0.00701571	0.00237333	0.0157527	0.0170979	0.00536806	0.00940324	0.01344	0.0120395	0.0106562	0.017783	0.0202169	0.0253976	0.0112801	0.0129711	0.000693241	0.00209964	0.00221672	0.00110787	0.0137691	0.0106803	0.00208524	0.00589865	0.00760771	0.00536923	0.00701571	0.00237333	0.0157527	0.0170979	0.00536806	0.00940324	0.01344	0.0120395	0.0106562
POLG	LOF	AD	POLG-AD	Other rare neuromuscular disorders	Neuromuscular	Mitochondrial DNA depletion syndrome 4A (Alpers type) (203700) (AR);Mitochondrial DNA depletion syndrome 4B (MNGIE type) (613662) (AR);Mitochondrial recessive ataxia syndrome (includes SANDO and SCAE) (607459) (AR);Progressive external ophthalmoplegia, autosomal dominant 1 (157640) (AD);Progressive external ophthalmoplegia, autosomal recessive 1 (258450) (AR)	0.000693241	0.00209964	0.00221672	0.00110787	0.0137691	0.0106803	0.00208524	0.00589865	0.00760771	0.00536923	0.00701571	0.00237333	0.0157527	0.0170979	0.00536806	0.00940324	0.01344	0.0120395	0.0106562	0.017783	0.0202169	0.0253976	0.0112801	0.0129711	0.000693241	0.00209964	0.00221672	0.00110787	0.0137691	0.0106803	0.00208524	0.00589865	0.00760771	0.00536923	0.00701571	0.00237333	0.0157527	0.0170979	0.00536806	0.00940324	0.01344	0.0120395	0.0106562
POLG	LOF	AD	POLG-AD	Ataxia and cerebellar anomalies - narrow panel	Neurological	Mitochondrial DNA depletion syndrome 4A (Alpers type) (203700) (AR);Mitochondrial DNA depletion syndrome 4B (MNGIE type) (613662) (AR);Mitochondrial recessive ataxia syndrome (includes SANDO and SCAE) (607459) (AR);Progressive external ophthalmoplegia, autosomal dominant 1 (157640) (AD);Progressive external ophthalmoplegia, autosomal recessive 1 (258450) (AR)	0.000693241	0.00209964	0.00221672	0.00110787	0.0137691	0.0106803	0.00208524	0.00589865	0.00760771	0.00536923	0.00701571	0.00237333	0.0157527	0.0170979	0.00536806	0.00940324	0.01344	0.0120395	0.0106562	0.017783	0.0202169	0.0253976	0.0112801	0.0129711	0.000693241	0.00209964	0.00221672	0.00110787	0.0137691	0.0106803	0.00208524	0.00589865	0.00760771	0.00536923	0.00701571	0.00237333	0.0157527	0.0170979	0.00536806	0.00940324	0.01344	0.0120395	0.0106562
POLG	LOF	AD	POLG-AD	Mitochondrial liver disease, including transient infantile liver failure	Mitochrondrial	Mitochondrial DNA depletion syndrome 4A (Alpers type) (203700) (AR);Mitochondrial DNA depletion syndrome 4B (MNGIE type) (613662) (AR);Mitochondrial recessive ataxia syndrome (includes SANDO and SCAE) (607459) (AR);Progressive external ophthalmoplegia, autosomal dominant 1 (157640) (AD);Progressive external ophthalmoplegia, autosomal recessive 1 (258450) (AR)	0.000693241	0.00209964	0.00221672	0.00110787	0.0137691	0.0106803	0.00208524	0.00589865	0.00760771	0.00536923	0.00701571	0.00237333	0.0157527	0.0170979	0.00536806	0.00940324	0.01344	0.0120395	0.0106562	0.017783	0.0202169	0.0253976	0.0112801	0.0129711	0.000693241	0.00209964	0.00221672	0.00110787	0.0137691	0.0106803	0.00208524	0.00589865	0.00760771	0.00536923	0.00701571	0.00237333	0.0157527	0.0170979	0.00536806	0.00940324	0.01344	0.0120395	0.0106562
POLG	LOF	AD	POLG-AD	Undiagnosed metabolic disorders	Metabolic	Mitochondrial DNA depletion syndrome 4A (Alpers type) (203700) (AR);Mitochondrial DNA depletion syndrome 4B (MNGIE type) (613662) (AR);Mitochondrial recessive ataxia syndrome (includes SANDO and SCAE) (607459) (AR);Progressive external ophthalmoplegia, autosomal dominant 1 (157640) (AD);Progressive external ophthalmoplegia, autosomal recessive 1 (258450) (AR)	0.000693241	0.00209964	0.00221672	0.00110787	0.0137691	0.0106803	0.00208524	0.00589865	0.00760771	0.00536923	0.00701571	0.00237333	0.0157527	0.0170979	0.00536806	0.00940324	0.01344	0.0120395	0.0106562	0.017783	0.0202169	0.0253976	0.0112801	0.0129711	0.000693241	0.00209964	0.00221672	0.00110787	0.0137691	0.0106803	0.00208524	0.00589865	0.00760771	0.00536923	0.00701571	0.00237333	0.0157527	0.0170979	0.00536806	0.00940324	0.01344	0.0120395	0.0106562
POLG	LOF	AD	POLG-AD	Bilateral congenital or childhood onset cataracts	Eye	Mitochondrial DNA depletion syndrome 4A (Alpers type) (203700) (AR);Mitochondrial DNA depletion syndrome 4B (MNGIE type) (613662) (AR);Mitochondrial recessive ataxia syndrome (includes SANDO and SCAE) (607459) (AR);Progressive external ophthalmoplegia, autosomal dominant 1 (157640) (AD);Progressive external ophthalmoplegia, autosomal recessive 1 (258450) (AR)	0.000693241	0.00209964	0.00221672	0.00110787	0.0137691	0.0106803	0.00208524	0.00589865	0.00760771	0.00536923	0.00701571	0.00237333	0.0157527	0.0170979	0.00536806	0.00940324	0.01344	0.0120395	0.0106562	0.017783	0.0202169	0.0253976	0.0112801	0.0129711	0.000693241	0.00209964	0.00221672	0.00110787	0.0137691	0.0106803	0.00208524	0.00589865	0.00760771	0.00536923	0.00701571	0.00237333	0.0157527	0.0170979	0.00536806	0.00940324	0.01344	0.0120395	0.0106562
POLG	LOF	AD	POLG-AD	Primary ovarian insufficiency	Endocrine	Mitochondrial DNA depletion syndrome 4A (Alpers type) (203700) (AR);Mitochondrial DNA depletion syndrome 4B (MNGIE type) (613662) (AR);Mitochondrial recessive ataxia syndrome (includes SANDO and SCAE) (607459) (AR);Progressive external ophthalmoplegia, autosomal dominant 1 (157640) (AD);Progressive external ophthalmoplegia, autosomal recessive 1 (258450) (AR)	0.000693241	0.00209964	0.00221672	0.00110787	0.0137691	0.0106803	0.00208524	0.00589865	0.00760771	0.00536923	0.00701571	0.00237333	0.0157527	0.0170979	0.00536806	0.00940324	0.01344	0.0120395	0.0106562	0.017783	0.0202169	0.0253976	0.0112801	0.0129711	0.000693241	0.00209964	0.00221672	0.00110787	0.0137691	0.0106803	0.00208524	0.00589865	0.00760771	0.00536923	0.00701571	0.00237333	0.0157527	0.0170979	0.00536806	0.00940324	0.01344	0.0120395	0.0106562
ABCA1	LOF	AD	ABCA1-AD	Severe Paediatric Disorders	Severe Paediatric Disorders	HDL deficiency, familial, 1 (604091) (AD);Tangier disease (205400) (AR)	0.000693241	0.00049992	0.00198855	0.000201562	7.49008e-05	0.00113844	0.000441671	0.000239006	0.00115069	0.00113516	0.00219645	0.00153433	0.00190319	0.00191048	0.00111367	0.000830673	0.00350114	0.00931783	0.00514255	0.00482153	0.00804769	0.00394479	0.00583195	0.0037017	0.000693241	0.00049992	0.00198855	0.000201562	7.49008e-05	0.00113844	0.000441671	0.000239006	0.00115069	0.00113516	0.00219645	0.00153433	0.00190319	0.00191048	0.00111367	0.000830673	0.00350114	0.00931783	0.00514255
PMS2	LOF	AD	PMS2-AD	Brain cancer pertinent cancer susceptibility	Neoplasm	Lynch syndrome 4 (614337);Mismatch repair cancer syndrome 4 (619101) (AR)	0.000693241	0.000769405	0.000464937	0.000555891	0.000190485	0.0008896	0.000984983	0.000846991	0.000693241	0.000903718	0.000464937	0.00101786	0.000190485	0.00148582	0.00144956	0.00102685	0.000693241	0.000956581	0.000464937	0.00152226	0.000190485	0.0015523	0.00147275	0.00102685	0.000693241	0.000769405	0.000464937	0.000555891	0.000190485	0.0008896	0.000984983	0.000846991	0.000693241	0.000903718	0.000464937	0.00101786	0.000190485	0.00148582	0.00144956	0.00102685	0.000693241	0.000956581	0.000464937
PMS2	LOF	AD	PMS2-AD	Severe Paediatric Disorders	Severe Paediatric Disorders	Lynch syndrome 4 (614337);Mismatch repair cancer syndrome 4 (619101) (AR)	0.000693241	0.000769405	0.000464937	0.000555891	0.000190485	0.0008896	0.000984983	0.000846991	0.000693241	0.000903718	0.000464937	0.00101786	0.000190485	0.00148582	0.00144956	0.00102685	0.000693241	0.000956581	0.000464937	0.00152226	0.000190485	0.0015523	0.00147275	0.00102685	0.000693241	0.000769405	0.000464937	0.000555891	0.000190485	0.0008896	0.000984983	0.000846991	0.000693241	0.000903718	0.000464937	0.00101786	0.000190485	0.00148582	0.00144956	0.00102685	0.000693241	0.000956581	0.000464937
LAMB3	LOF	AD	LAMB3-AD	Amelogenesis imperfecta	Skeletal/Connective Tissue	Amelogenesis imperfecta, type IA (104530) (AD);Epidermolysis bullosa, junctional 1A, intermediate (226650) (AR);Epidermolysis bullosa, junctional 1B, severe (226700) (AR)	0.000693241	0.000939336	0.000384377	0.000705125	0.000937166	0.00298564	0.00134461	0.00274963	0.00145478	0.00120738	0.000690902	0.00105747	0.00104955	0.00324792	0.00185836	0.00316677	0.00145478	0.00120738	0.000690902	0.00105747	0.00104955	0.00324971	0.0018815	0.00316677	0.000693241	0.000939336	0.000384377	0.000705125	0.000937166	0.00298564	0.00134461	0.00274963	0.00145478	0.00120738	0.000690902	0.00105747	0.00104955	0.00324792	0.00185836	0.00316677	0.00145478	0.00120738	0.000690902
LAMB3	LOF	AD	LAMB3-AD	Severe Paediatric Disorders	Severe Paediatric Disorders	Amelogenesis imperfecta, type IA (104530) (AD);Epidermolysis bullosa, junctional 1A, intermediate (226650) (AR);Epidermolysis bullosa, junctional 1B, severe (226700) (AR)	0.000693241	0.000939336	0.000384377	0.000705125	0.000937166	0.00298564	0.00134461	0.00274963	0.00145478	0.00120738	0.000690902	0.00105747	0.00104955	0.00324792	0.00185836	0.00316677	0.00145478	0.00120738	0.000690902	0.00105747	0.00104955	0.00324971	0.0018815	0.00316677	0.000693241	0.000939336	0.000384377	0.000705125	0.000937166	0.00298564	0.00134461	0.00274963	0.00145478	0.00120738	0.000690902	0.00105747	0.00104955	0.00324792	0.00185836	0.00316677	0.00145478	0.00120738	0.000690902
CNGA1	LOF	AD	CNGA1-AD	Retinal disorders	Eye	Retinitis pigmentosa 49 (613756) (AR)	0.000693241	0.00152057	0.000383529	0.00342175	0.00130996	0.00515475	0.0014369	0.00250676	0.00624898	0.00210097	0.000460025	0.00563219	0.00158073	0.00607136	0.00243848	0.00399884	0.00831422	0.00446335	0.00664101	0.00753549	0.00550098	0.00717843	0.00534976	0.00613988	0.000693241	0.00152057	0.000383529	0.00342175	0.00130996	0.00515475	0.0014369	0.00250676	0.00624898	0.00210097	0.000460025	0.00563219	0.00158073	0.00607136	0.00243848	0.00399884	0.00831422	0.00446335	0.00664101
BLK	LOF	AD	BLK-AD	COVID-19 research	Immune System/Infectious	Maturity-onset diabetes of the young, type 11 (613375) (AD)	0.000693241	0.000224164	0.000229565	0.000201491	0.000187479	0.000226764	0.000492856	0.000298677	0.0013866	0.000447686	0.000382588	0.00176271	0.000415522	0.000825548	0.0011666	0.000537554	0.0013866	0.000894613	0.00579944	0.00186328	0.000415522	0.00101066	0.00146766	0.000656971	0.000693241	0.000224164	0.000229565	0.000201491	0.000187479	0.000226764	0.000492856	0.000298677	0.0013866	0.000447686	0.000382588	0.00176271	0.000415522	0.000825548	0.0011666	0.000537554	0.0013866	0.000894613	0.00579944
FGA	LOF	AD	FGA-AD	Inherited bleeding disorders	Hematologic	Afibrinogenemia, congenital (202400) (AR);Amyloidosis, hereditary systemic 2 (105200) (AD);Dysfibrinogenemia, congenital (616004);Hypodysfibrinogenemia, congenital (616004)	0.000693241	0.000268288	7.65257e-05	5.04248e-05	0	0.000584539	0.000302079	0.000358981	0.000693241	0.000759963	7.65257e-05	0.000659293	3.74427e-05	0.000852546	0.000860294	0.000657543	0.00691077	0.00111739	0.00015304	0.000659293	3.74427e-05	0.000954985	0.000906633	0.00071725	0.000693241	0.000268288	7.65257e-05	5.04248e-05	0	0.000584539	0.000302079	0.000358981	0.000693241	0.000759963	7.65257e-05	0.000659293	3.74427e-05	0.000852546	0.000860294	0.000657543	0.00691077	0.00111739	0.00015304
FGA	LOF	AD	FGA-AD	Severe Paediatric Disorders	Severe Paediatric Disorders	Afibrinogenemia, congenital (202400) (AR);Amyloidosis, hereditary systemic 2 (105200) (AD);Dysfibrinogenemia, congenital (616004);Hypodysfibrinogenemia, congenital (616004)	0.000693241	0.000268288	7.65257e-05	5.04248e-05	0	0.000584539	0.000302079	0.000358981	0.000693241	0.000759963	7.65257e-05	0.000659293	3.74427e-05	0.000852546	0.000860294	0.000657543	0.00691077	0.00111739	0.00015304	0.000659293	3.74427e-05	0.000954985	0.000906633	0.00071725	0.000693241	0.000268288	7.65257e-05	5.04248e-05	0	0.000584539	0.000302079	0.000358981	0.000693241	0.000759963	7.65257e-05	0.000659293	3.74427e-05	0.000852546	0.000860294	0.000657543	0.00691077	0.00111739	0.00015304
FGA	LOF	AD	FGA-AD	Periodic fever syndromes	Rheumatic	Afibrinogenemia, congenital (202400) (AR);Amyloidosis, hereditary systemic 2 (105200) (AD);Dysfibrinogenemia, congenital (616004);Hypodysfibrinogenemia, congenital (616004)	0.000693241	0.000268288	7.65257e-05	5.04248e-05	0	0.000584539	0.000302079	0.000358981	0.000693241	0.000759963	7.65257e-05	0.000659293	3.74427e-05	0.000852546	0.000860294	0.000657543	0.00691077	0.00111739	0.00015304	0.000659293	3.74427e-05	0.000954985	0.000906633	0.00071725	0.000693241	0.000268288	7.65257e-05	5.04248e-05	0	0.000584539	0.000302079	0.000358981	0.000693241	0.000759963	7.65257e-05	0.000659293	3.74427e-05	0.000852546	0.000860294	0.000657543	0.00691077	0.00111739	0.00015304
ITGB3	Both	AD	ITGB3-AD	Inherited bleeding disorders	Hematologic	{Myocardial infarction, susceptibility to} (608446);Bleeding disorder, platelet-type, 24, autosomal dominant (619271) (AD);Glanzmann thrombasthenia 2 (619267) (AR);Purpura, posttransfusion;Thrombocytopenia, neonatal alloimmune;{Myocardial infarction, susceptibility to} (608446);Bleeding disorder, platelet-type, 24, autosomal dominant (619271) (AD);Glanzmann thrombasthenia 2 (619267) (AR);Purpura,…	0.000693241	0.00143011	7.65199e-05	0.00171144	9.89618e-05	0.000689228	0.000664592	0.00194265	0.001386	0.0016915	0.00024551	0.00196287	0.000519011	0.000866	0.000882102	0.00249561	0.001386	0.00200397	0.00024551	0.00341989	0.000519011	0.00103543	0.0014611	0.00267447	0.000693241	0.00143011	7.65199e-05	0.00171144	9.89618e-05	0.000689228	0.000664592	0.00194265	0.001386	0.0016915	0.00024551	0.00196287	0.000519011	0.000866	0.000882102	0.00249561	0.001386	0.00200397	0.00024551
ITGB3	Both	AD	ITGB3-AD	Severe Paediatric Disorders	Severe Paediatric Disorders	{Myocardial infarction, susceptibility to} (608446);Bleeding disorder, platelet-type, 24, autosomal dominant (619271) (AD);Glanzmann thrombasthenia 2 (619267) (AR);Purpura, posttransfusion;Thrombocytopenia, neonatal alloimmune;{Myocardial infarction, susceptibility to} (608446);Bleeding disorder, platelet-type, 24, autosomal dominant (619271) (AD);Glanzmann thrombasthenia 2 (619267) (AR);Purpura,…	0.000693241	0.00143011	7.65199e-05	0.00171144	9.89618e-05	0.000689228	0.000664592	0.00194265	0.001386	0.0016915	0.00024551	0.00196287	0.000519011	0.000866	0.000882102	0.00249561	0.001386	0.00200397	0.00024551	0.00341989	0.000519011	0.00103543	0.0014611	0.00267447	0.000693241	0.00143011	7.65199e-05	0.00171144	9.89618e-05	0.000689228	0.000664592	0.00194265	0.001386	0.0016915	0.00024551	0.00196287	0.000519011	0.000866	0.000882102	0.00249561	0.001386	0.00200397	0.00024551
PCSK9	LOF	AD	PCSK9-AD	Severe Paediatric Disorders	Severe Paediatric Disorders	{Low density lipoprotein cholesterol level QTL 1} (603776) (AD);Hypercholesterolemia, familial, 3 (603776) (AD)	0.000693241	0.00022404	0	0.0109414	0	4.32266e-05	0.000165488	5.97354e-05	0.00428778	0.00167197	0.00191138	0.012308	0.00044313	0.000895784	0.00239218	0.00679756	0.00580293	0.00302948	0.00191138	0.0137498	0.000518663	0.0023219	0.00454681	0.00768725	0.000693241	0.00022404	0	0.0109414	0	4.32266e-05	0.000165488	5.97354e-05	0.00428778	0.00167197	0.00191138	0.012308	0.00044313	0.000895784	0.00239218	0.00679756	0.00580293	0.00302948	0.00191138
PCSK9	LOF	AD	PCSK9-AD	Familial hypercholesterolaemia	Metabolic	{Low density lipoprotein cholesterol level QTL 1} (603776) (AD);Hypercholesterolemia, familial, 3 (603776) (AD)	0.000693241	0.00022404	0	0.0109414	0	4.32266e-05	0.000165488	5.97354e-05	0.00428778	0.00167197	0.00191138	0.012308	0.00044313	0.000895784	0.00239218	0.00679756	0.00580293	0.00302948	0.00191138	0.0137498	0.000518663	0.0023219	0.00454681	0.00768725	0.000693241	0.00022404	0	0.0109414	0	4.32266e-05	0.000165488	5.97354e-05	0.00428778	0.00167197	0.00191138	0.012308	0.00044313	0.000895784	0.00239218	0.00679756	0.00580293	0.00302948	0.00191138
PCSK9	LOF	AD	PCSK9-AD	Additional findings health related - children	Metabolic	{Low density lipoprotein cholesterol level QTL 1} (603776) (AD);Hypercholesterolemia, familial, 3 (603776) (AD)	0.000693241	0.00022404	0	0.0109414	0	4.32266e-05	0.000165488	5.97354e-05	0.00428778	0.00167197	0.00191138	0.012308	0.00044313	0.000895784	0.00239218	0.00679756	0.00580293	0.00302948	0.00191138	0.0137498	0.000518663	0.0023219	0.00454681	0.00768725	0.000693241	0.00022404	0	0.0109414	0	4.32266e-05	0.000165488	5.97354e-05	0.00428778	0.00167197	0.00191138	0.012308	0.00044313	0.000895784	0.00239218	0.00679756	0.00580293	0.00302948	0.00191138
MAT1A	LOF	AD	MAT1A-AD	Severe Paediatric Disorders	Severe Paediatric Disorders	Hypermethioninemia, persistent, autosomal dominant, due to methionine adenosyltransferase I/III deficiency (250850) (AD, AR);Methionine adenosyltransferase deficiency, autosomal recessive (250850) (AD, AR)	0.000693241	0.000503958	0	0.0004144	0.000114465	0.000187813	0.000213374	0.000180932	0.00138648	0.000727526	7.65316e-05	0.00157524	0.00337282	0.000578442	0.000867141	0.00107953	0.00244803	0.00112962	0.000153057	0.00253506	0.00359984	0.000976136	0.00161045	0.00137789	0.000693241	0.000503958	0	0.0004144	0.000114465	0.000187813	0.000213374	0.000180932	0.00138648	0.000727526	7.65316e-05	0.00157524	0.00337282	0.000578442	0.000867141	0.00107953	0.00244803	0.00112962	0.000153057
MAT1A	LOF	AD	MAT1A-AD	Intellectual disability - microarray and sequencing	Neurological	Hypermethioninemia, persistent, autosomal dominant, due to methionine adenosyltransferase I/III deficiency (250850) (AD, AR);Methionine adenosyltransferase deficiency, autosomal recessive (250850) (AD, AR)	0.000693241	0.000503958	0	0.0004144	0.000114465	0.000187813	0.000213374	0.000180932	0.00138648	0.000727526	7.65316e-05	0.00157524	0.00337282	0.000578442	0.000867141	0.00107953	0.00244803	0.00112962	0.000153057	0.00253506	0.00359984	0.000976136	0.00161045	0.00137789	0.000693241	0.000503958	0	0.0004144	0.000114465	0.000187813	0.000213374	0.000180932	0.00138648	0.000727526	7.65316e-05	0.00157524	0.00337282	0.000578442	0.000867141	0.00107953	0.00244803	0.00112962	0.000153057
MAT1A	LOF	AD	MAT1A-AD	Undiagnosed metabolic disorders	Metabolic	Hypermethioninemia, persistent, autosomal dominant, due to methionine adenosyltransferase I/III deficiency (250850) (AD, AR);Methionine adenosyltransferase deficiency, autosomal recessive (250850) (AD, AR)	0.000693241	0.000503958	0	0.0004144	0.000114465	0.000187813	0.000213374	0.000180932	0.00138648	0.000727526	7.65316e-05	0.00157524	0.00337282	0.000578442	0.000867141	0.00107953	0.00244803	0.00112962	0.000153057	0.00253506	0.00359984	0.000976136	0.00161045	0.00137789	0.000693241	0.000503958	0	0.0004144	0.000114465	0.000187813	0.000213374	0.000180932	0.00138648	0.000727526	7.65316e-05	0.00157524	0.00337282	0.000578442	0.000867141	0.00107953	0.00244803	0.00112962	0.000153057
TSC1	LOF	AD	TSC1-AD	Fetal anomalies	Congenital/Developmental	Focal cortical dysplasia, type II, somatic (607341);Lymphangioleiomyomatosis (606690);Tuberous sclerosis-1 (191100) (AD);Focal cortical dysplasia, type II, somatic (607341);Lymphangioleiomyomatosis (606690);Tuberous sclerosis-1 (191100) (AD);Focal cortical dysplasia, type II, somatic (607341);Lymphangioleiomyomatosis (606690);Tuberous sclerosis-1 (191100) (AD)	0.000620925	0.000370488	0	5.03766e-05	0.000130973	6.02379e-05	6.08251e-05	0.000161663	0.000620925	0.00062127	0.000956196	0.000963527	0.00113462	0.000534533	0.000197014	0.000729843	0.00124146	0.00066596	0.000956196	0.00108081	0.00135888	0.000664806	0.000243377	0.000789535	0.000620925	0.000370488	0	5.03766e-05	0.000130973	6.02379e-05	6.08251e-05	0.000161663	0.000620925	0.00062127	0.000956196	0.000963527	0.00113462	0.000534533	0.000197014	0.000729843	0.00124146	0.00066596	0.000956196
TSC1	LOF	AD	TSC1-AD	Severe Paediatric Disorders	Severe Paediatric Disorders	Focal cortical dysplasia, type II, somatic (607341);Lymphangioleiomyomatosis (606690);Tuberous sclerosis-1 (191100) (AD);Focal cortical dysplasia, type II, somatic (607341);Lymphangioleiomyomatosis (606690);Tuberous sclerosis-1 (191100) (AD);Focal cortical dysplasia, type II, somatic (607341);Lymphangioleiomyomatosis (606690);Tuberous sclerosis-1 (191100) (AD)	0.000620925	0.000370488	0	5.03766e-05	0.000130973	6.02379e-05	6.08251e-05	0.000161663	0.000620925	0.00062127	0.000956196	0.000963527	0.00113462	0.000534533	0.000197014	0.000729843	0.00124146	0.00066596	0.000956196	0.00108081	0.00135888	0.000664806	0.000243377	0.000789535	0.000620925	0.000370488	0	5.03766e-05	0.000130973	6.02379e-05	6.08251e-05	0.000161663	0.000620925	0.00062127	0.000956196	0.000963527	0.00113462	0.000534533	0.000197014	0.000729843	0.00124146	0.00066596	0.000956196
TSC1	LOF	AD	TSC1-AD	Pneumothorax - familial	Pulmonary	Focal cortical dysplasia, type II, somatic (607341);Lymphangioleiomyomatosis (606690);Tuberous sclerosis-1 (191100) (AD);Focal cortical dysplasia, type II, somatic (607341);Lymphangioleiomyomatosis (606690);Tuberous sclerosis-1 (191100) (AD);Focal cortical dysplasia, type II, somatic (607341);Lymphangioleiomyomatosis (606690);Tuberous sclerosis-1 (191100) (AD)	0.000620925	0.000370488	0	5.03766e-05	0.000130973	6.02379e-05	6.08251e-05	0.000161663	0.000620925	0.00062127	0.000956196	0.000963527	0.00113462	0.000534533	0.000197014	0.000729843	0.00124146	0.00066596	0.000956196	0.00108081	0.00135888	0.000664806	0.000243377	0.000789535	0.000620925	0.000370488	0	5.03766e-05	0.000130973	6.02379e-05	6.08251e-05	0.000161663	0.000620925	0.00062127	0.000956196	0.000963527	0.00113462	0.000534533	0.000197014	0.000729843	0.00124146	0.00066596	0.000956196
TSC1	LOF	AD	TSC1-AD	Classical tuberous sclerosis	Neurological	Focal cortical dysplasia, type II, somatic (607341);Lymphangioleiomyomatosis (606690);Tuberous sclerosis-1 (191100) (AD);Focal cortical dysplasia, type II, somatic (607341);Lymphangioleiomyomatosis (606690);Tuberous sclerosis-1 (191100) (AD);Focal cortical dysplasia, type II, somatic (607341);Lymphangioleiomyomatosis (606690);Tuberous sclerosis-1 (191100) (AD)	0.000620925	0.000370488	0	5.03766e-05	0.000130973	6.02379e-05	6.08251e-05	0.000161663	0.000620925	0.00062127	0.000956196	0.000963527	0.00113462	0.000534533	0.000197014	0.000729843	0.00124146	0.00066596	0.000956196	0.00108081	0.00135888	0.000664806	0.000243377	0.000789535	0.000620925	0.000370488	0	5.03766e-05	0.000130973	6.02379e-05	6.08251e-05	0.000161663	0.000620925	0.00062127	0.000956196	0.000963527	0.00113462	0.000534533	0.000197014	0.000729843	0.00124146	0.00066596	0.000956196
TSC1	LOF	AD	TSC1-AD	Cystic kidney disease	Kidney/Urinary System	Focal cortical dysplasia, type II, somatic (607341);Lymphangioleiomyomatosis (606690);Tuberous sclerosis-1 (191100) (AD);Focal cortical dysplasia, type II, somatic (607341);Lymphangioleiomyomatosis (606690);Tuberous sclerosis-1 (191100) (AD);Focal cortical dysplasia, type II, somatic (607341);Lymphangioleiomyomatosis (606690);Tuberous sclerosis-1 (191100) (AD)	0.000620925	0.000370488	0	5.03766e-05	0.000130973	6.02379e-05	6.08251e-05	0.000161663	0.000620925	0.00062127	0.000956196	0.000963527	0.00113462	0.000534533	0.000197014	0.000729843	0.00124146	0.00066596	0.000956196	0.00108081	0.00135888	0.000664806	0.000243377	0.000789535	0.000620925	0.000370488	0	5.03766e-05	0.000130973	6.02379e-05	6.08251e-05	0.000161663	0.000620925	0.00062127	0.000956196	0.000963527	0.00113462	0.000534533	0.000197014	0.000729843	0.00124146	0.00066596	0.000956196
TSC1	LOF	AD	TSC1-AD	Primary lymphoedema	Cardiovascular	Focal cortical dysplasia, type II, somatic (607341);Lymphangioleiomyomatosis (606690);Tuberous sclerosis-1 (191100) (AD);Focal cortical dysplasia, type II, somatic (607341);Lymphangioleiomyomatosis (606690);Tuberous sclerosis-1 (191100) (AD);Focal cortical dysplasia, type II, somatic (607341);Lymphangioleiomyomatosis (606690);Tuberous sclerosis-1 (191100) (AD)	0.000620925	0.000370488	0	5.03766e-05	0.000130973	6.02379e-05	6.08251e-05	0.000161663	0.000620925	0.00062127	0.000956196	0.000963527	0.00113462	0.000534533	0.000197014	0.000729843	0.00124146	0.00066596	0.000956196	0.00108081	0.00135888	0.000664806	0.000243377	0.000789535	0.000620925	0.000370488	0	5.03766e-05	0.000130973	6.02379e-05	6.08251e-05	0.000161663	0.000620925	0.00062127	0.000956196	0.000963527	0.00113462	0.000534533	0.000197014	0.000729843	0.00124146	0.00066596	0.000956196
TSC1	LOF	AD	TSC1-AD	Adult solid tumours for rare disease	Neoplasm	Focal cortical dysplasia, type II, somatic (607341);Lymphangioleiomyomatosis (606690);Tuberous sclerosis-1 (191100) (AD);Focal cortical dysplasia, type II, somatic (607341);Lymphangioleiomyomatosis (606690);Tuberous sclerosis-1 (191100) (AD);Focal cortical dysplasia, type II, somatic (607341);Lymphangioleiomyomatosis (606690);Tuberous sclerosis-1 (191100) (AD)	0.000620925	0.000370488	0	5.03766e-05	0.000130973	6.02379e-05	6.08251e-05	0.000161663	0.000620925	0.00062127	0.000956196	0.000963527	0.00113462	0.000534533	0.000197014	0.000729843	0.00124146	0.00066596	0.000956196	0.00108081	0.00135888	0.000664806	0.000243377	0.000789535	0.000620925	0.000370488	0	5.03766e-05	0.000130973	6.02379e-05	6.08251e-05	0.000161663	0.000620925	0.00062127	0.000956196	0.000963527	0.00113462	0.000534533	0.000197014	0.000729843	0.00124146	0.00066596	0.000956196
TSC1	LOF	AD	TSC1-AD	Pigmentary skin disorders	Skin	Focal cortical dysplasia, type II, somatic (607341);Lymphangioleiomyomatosis (606690);Tuberous sclerosis-1 (191100) (AD);Focal cortical dysplasia, type II, somatic (607341);Lymphangioleiomyomatosis (606690);Tuberous sclerosis-1 (191100) (AD);Focal cortical dysplasia, type II, somatic (607341);Lymphangioleiomyomatosis (606690);Tuberous sclerosis-1 (191100) (AD)	0.000620925	0.000370488	0	5.03766e-05	0.000130973	6.02379e-05	6.08251e-05	0.000161663	0.000620925	0.00062127	0.000956196	0.000963527	0.00113462	0.000534533	0.000197014	0.000729843	0.00124146	0.00066596	0.000956196	0.00108081	0.00135888	0.000664806	0.000243377	0.000789535	0.000620925	0.000370488	0	5.03766e-05	0.000130973	6.02379e-05	6.08251e-05	0.000161663	0.000620925	0.00062127	0.000956196	0.000963527	0.00113462	0.000534533	0.000197014	0.000729843	0.00124146	0.00066596	0.000956196
DNM1	LOF	AD	DNM1-AD	DDG2P	Congenital/Developmental	Developmental and epileptic encephalopathy 31A, autosomal dominant (616346) (AD);Developmental and epileptic encephalopathy 31B, autosomal recessive (620352) (AR)	0.000612557	8.94694e-05	0.000362202	0.000423266	6.48824e-05	0.000369518	0	0.000259437	0.000612557	0.000273754	0.000362202	0.000423266	0.000227353	0.000527281	0.000185283	0.000576739	0.000959266	0.000842083	0.00167161	0.00187057	0.00102499	0.00124192	0.00132978	0.00143893	0.000612557	8.94694e-05	0.000362202	0.000423266	6.48824e-05	0.000369518	0	0.000259437	0.000612557	0.000273754	0.000362202	0.000423266	0.000227353	0.000527281	0.000185283	0.000576739	0.000959266	0.000842083	0.00167161
DNM1	LOF	AD	DNM1-AD	Severe Paediatric Disorders	Severe Paediatric Disorders	Developmental and epileptic encephalopathy 31A, autosomal dominant (616346) (AD);Developmental and epileptic encephalopathy 31B, autosomal recessive (620352) (AR)	0.000612557	8.94694e-05	0.000362202	0.000423266	6.48824e-05	0.000369518	0	0.000259437	0.000612557	0.000273754	0.000362202	0.000423266	0.000227353	0.000527281	0.000185283	0.000576739	0.000959266	0.000842083	0.00167161	0.00187057	0.00102499	0.00124192	0.00132978	0.00143893	0.000612557	8.94694e-05	0.000362202	0.000423266	6.48824e-05	0.000369518	0	0.000259437	0.000612557	0.000273754	0.000362202	0.000423266	0.000227353	0.000527281	0.000185283	0.000576739	0.000959266	0.000842083	0.00167161
DNM1	LOF	AD	DNM1-AD	Early onset or syndromic epilepsy	Neurological	Developmental and epileptic encephalopathy 31A, autosomal dominant (616346) (AD);Developmental and epileptic encephalopathy 31B, autosomal recessive (620352) (AR)	0.000612557	8.94694e-05	0.000362202	0.000423266	6.48824e-05	0.000369518	0	0.000259437	0.000612557	0.000273754	0.000362202	0.000423266	0.000227353	0.000527281	0.000185283	0.000576739	0.000959266	0.000842083	0.00167161	0.00187057	0.00102499	0.00124192	0.00132978	0.00143893	0.000612557	8.94694e-05	0.000362202	0.000423266	6.48824e-05	0.000369518	0	0.000259437	0.000612557	0.000273754	0.000362202	0.000423266	0.000227353	0.000527281	0.000185283	0.000576739	0.000959266	0.000842083	0.00167161
SMARCC2	LOF	AD	SMARCC2-AD	Severe Paediatric Disorders	Severe Paediatric Disorders	Coffin-Siris syndrome 8 (618362) (AD)	0.00055417	0.00082804	0.000206186	0.000380853	0.005894	0.000170412	0.000598734	0.000750469	0.000910035	0.00124122	0.000282883	0.000431211	0.00632106	0.000353845	0.000698149	0.00119792	0.000910035	0.00124122	0.000282883	0.000431211	0.00632106	0.000382647	0.000698149	0.00125769	0.00055417	0.00082804	0.000206186	0.000380853	0.005894	0.000170412	0.000598734	0.000750469	0.000910035	0.00124122	0.000282883	0.000431211	0.00632106	0.000353845	0.000698149	0.00119792	0.000910035	0.00124122	0.000282883
SMARCC2	LOF	AD	SMARCC2-AD	Early onset or syndromic epilepsy	Neurological	Coffin-Siris syndrome 8 (618362) (AD)	0.00055417	0.00082804	0.000206186	0.000380853	0.005894	0.000170412	0.000598734	0.000750469	0.000910035	0.00124122	0.000282883	0.000431211	0.00632106	0.000353845	0.000698149	0.00119792	0.000910035	0.00124122	0.000282883	0.000431211	0.00632106	0.000382647	0.000698149	0.00125769	0.00055417	0.00082804	0.000206186	0.000380853	0.005894	0.000170412	0.000598734	0.000750469	0.000910035	0.00124122	0.000282883	0.000431211	0.00632106	0.000353845	0.000698149	0.00119792	0.000910035	0.00124122	0.000282883
SMARCC2	LOF	AD	SMARCC2-AD	DDG2P	Congenital/Developmental	Coffin-Siris syndrome 8 (618362) (AD)	0.00055417	0.00082804	0.000206186	0.000380853	0.005894	0.000170412	0.000598734	0.000750469	0.000910035	0.00124122	0.000282883	0.000431211	0.00632106	0.000353845	0.000698149	0.00119792	0.000910035	0.00124122	0.000282883	0.000431211	0.00632106	0.000382647	0.000698149	0.00125769	0.00055417	0.00082804	0.000206186	0.000380853	0.005894	0.000170412	0.000598734	0.000750469	0.000910035	0.00124122	0.000282883	0.000431211	0.00632106	0.000353845	0.000698149	0.00119792	0.000910035	0.00124122	0.000282883
FOXG1	LOF	AD	FOXG1-AD	Fetal anomalies	Congenital/Developmental	Rett syndrome, congenital variant (613454) (AD)	0.000530645	0	0	0	6.59261e-05	2.81502e-05	0	0	0.000530645	0.000124836	0	0.000365321	0.000246373	0.000117773	0	0.000267283	0.000530645	0.000249447	7.65433e-05	0.000415684	0.000400912	0.000171737	2.31865e-05	0.000327003	0.000530645	0	0	0	6.59261e-05	2.81502e-05	0	0	0.000530645	0.000124836	0	0.000365321	0.000246373	0.000117773	0	0.000267283	0.000530645	0.000249447	7.65433e-05
FOXG1	LOF	AD	FOXG1-AD	Severe Paediatric Disorders	Severe Paediatric Disorders	Rett syndrome, congenital variant (613454) (AD)	0.000530645	0	0	0	6.59261e-05	2.81502e-05	0	0	0.000530645	0.000124836	0	0.000365321	0.000246373	0.000117773	0	0.000267283	0.000530645	0.000249447	7.65433e-05	0.000415684	0.000400912	0.000171737	2.31865e-05	0.000327003	0.000530645	0	0	0	6.59261e-05	2.81502e-05	0	0	0.000530645	0.000124836	0	0.000365321	0.000246373	0.000117773	0	0.000267283	0.000530645	0.000249447	7.65433e-05
FOXG1	LOF	AD	FOXG1-AD	Early onset dystonia	Neurological	Rett syndrome, congenital variant (613454) (AD)	0.000530645	0	0	0	6.59261e-05	2.81502e-05	0	0	0.000530645	0.000124836	0	0.000365321	0.000246373	0.000117773	0	0.000267283	0.000530645	0.000249447	7.65433e-05	0.000415684	0.000400912	0.000171737	2.31865e-05	0.000327003	0.000530645	0	0	0	6.59261e-05	2.81502e-05	0	0	0.000530645	0.000124836	0	0.000365321	0.000246373	0.000117773	0	0.000267283	0.000530645	0.000249447	7.65433e-05
TGFB2	LOF	AD	TGFB2-AD	Fetal anomalies	Congenital/Developmental	Loeys-Dietz syndrome 4 (614816) (AD)	0.000485791	0.0001241	8.97143e-05	0	0.000212789	2.94553e-05	0.000360916	0.000320897	0.000485791	0.0001241	8.97143e-05	0	0.000362574	0.000101638	0.000407945	0.000380613	0.000832303	0.000258662	8.97143e-05	0	0.000400032	0.00044333	0.000407945	0.000559804	0.000485791	0.0001241	8.97143e-05	0	0.000212789	2.94553e-05	0.000360916	0.000320897	0.000485791	0.0001241	8.97143e-05	0	0.000362574	0.000101638	0.000407945	0.000380613	0.000832303	0.000258662	8.97143e-05
TGFB2	LOF	AD	TGFB2-AD	Skeletal dysplasia	Skeletal/Connective Tissue	Loeys-Dietz syndrome 4 (614816) (AD)	0.000485791	0.0001241	8.97143e-05	0	0.000212789	2.94553e-05	0.000360916	0.000320897	0.000485791	0.0001241	8.97143e-05	0	0.000362574	0.000101638	0.000407945	0.000380613	0.000832303	0.000258662	8.97143e-05	0	0.000400032	0.00044333	0.000407945	0.000559804	0.000485791	0.0001241	8.97143e-05	0	0.000212789	2.94553e-05	0.000360916	0.000320897	0.000485791	0.0001241	8.97143e-05	0	0.000362574	0.000101638	0.000407945	0.000380613	0.000832303	0.000258662	8.97143e-05
TGFB2	LOF	AD	TGFB2-AD	Severe Paediatric Disorders	Severe Paediatric Disorders	Loeys-Dietz syndrome 4 (614816) (AD)	0.000485791	0.0001241	8.97143e-05	0	0.000212789	2.94553e-05	0.000360916	0.000320897	0.000485791	0.0001241	8.97143e-05	0	0.000362574	0.000101638	0.000407945	0.000380613	0.000832303	0.000258662	8.97143e-05	0	0.000400032	0.00044333	0.000407945	0.000559804	0.000485791	0.0001241	8.97143e-05	0	0.000212789	2.94553e-05	0.000360916	0.000320897	0.000485791	0.0001241	8.97143e-05	0	0.000362574	0.000101638	0.000407945	0.000380613	0.000832303	0.000258662	8.97143e-05
TGFB2	LOF	AD	TGFB2-AD	Pneumothorax - familial	Pulmonary	Loeys-Dietz syndrome 4 (614816) (AD)	0.000485791	0.0001241	8.97143e-05	0	0.000212789	2.94553e-05	0.000360916	0.000320897	0.000485791	0.0001241	8.97143e-05	0	0.000362574	0.000101638	0.000407945	0.000380613	0.000832303	0.000258662	8.97143e-05	0	0.000400032	0.00044333	0.000407945	0.000559804	0.000485791	0.0001241	8.97143e-05	0	0.000212789	2.94553e-05	0.000360916	0.000320897	0.000485791	0.0001241	8.97143e-05	0	0.000362574	0.000101638	0.000407945	0.000380613	0.000832303	0.000258662	8.97143e-05
TGFB2	LOF	AD	TGFB2-AD	Arthrogryposis	Neuromuscular	Loeys-Dietz syndrome 4 (614816) (AD)	0.000485791	0.0001241	8.97143e-05	0	0.000212789	2.94553e-05	0.000360916	0.000320897	0.000485791	0.0001241	8.97143e-05	0	0.000362574	0.000101638	0.000407945	0.000380613	0.000832303	0.000258662	8.97143e-05	0	0.000400032	0.00044333	0.000407945	0.000559804	0.000485791	0.0001241	8.97143e-05	0	0.000212789	2.94553e-05	0.000360916	0.000320897	0.000485791	0.0001241	8.97143e-05	0	0.000362574	0.000101638	0.000407945	0.000380613	0.000832303	0.000258662	8.97143e-05
TGFB2	LOF	AD	TGFB2-AD	Thoracic aortic aneurysm or dissection GMS	Cardiovascular	Loeys-Dietz syndrome 4 (614816) (AD)	0.000485791	0.0001241	8.97143e-05	0	0.000212789	2.94553e-05	0.000360916	0.000320897	0.000485791	0.0001241	8.97143e-05	0	0.000362574	0.000101638	0.000407945	0.000380613	0.000832303	0.000258662	8.97143e-05	0	0.000400032	0.00044333	0.000407945	0.000559804	0.000485791	0.0001241	8.97143e-05	0	0.000212789	2.94553e-05	0.000360916	0.000320897	0.000485791	0.0001241	8.97143e-05	0	0.000362574	0.000101638	0.000407945	0.000380613	0.000832303	0.000258662	8.97143e-05
PAFAH1B1	LOF	AD	PAFAH1B1-AD	Fetal anomalies	Congenital/Developmental	Lissencephaly 1 (607432) (AD);Subcortical laminar heterotopia (607432) (AD)	0.00048158	0.000502669	0.000165948	0.000266056	0.000327946	0.000110336	0.000150346	6.40718e-05	0.00048158	0.000551716	0.000165948	0.000266056	0.000327946	0.0001159	0.000150346	6.40718e-05	0.00048158	0.000596415	0.000165948	0.000369637	0.000443919	0.000257467	0.000407884	0.000247676	0.00048158	0.000502669	0.000165948	0.000266056	0.000327946	0.000110336	0.000150346	6.40718e-05	0.00048158	0.000551716	0.000165948	0.000266056	0.000327946	0.0001159	0.000150346	6.40718e-05	0.00048158	0.000596415	0.000165948
PAFAH1B1	LOF	AD	PAFAH1B1-AD	Severe Paediatric Disorders	Severe Paediatric Disorders	Lissencephaly 1 (607432) (AD);Subcortical laminar heterotopia (607432) (AD)	0.00048158	0.000502669	0.000165948	0.000266056	0.000327946	0.000110336	0.000150346	6.40718e-05	0.00048158	0.000551716	0.000165948	0.000266056	0.000327946	0.0001159	0.000150346	6.40718e-05	0.00048158	0.000596415	0.000165948	0.000369637	0.000443919	0.000257467	0.000407884	0.000247676	0.00048158	0.000502669	0.000165948	0.000266056	0.000327946	0.000110336	0.000150346	6.40718e-05	0.00048158	0.000551716	0.000165948	0.000266056	0.000327946	0.0001159	0.000150346	6.40718e-05	0.00048158	0.000596415	0.000165948
PAFAH1B1	LOF	AD	PAFAH1B1-AD	White matter disorders and cerebral calcification - narrow panel	Neurological	Lissencephaly 1 (607432) (AD);Subcortical laminar heterotopia (607432) (AD)	0.00048158	0.000502669	0.000165948	0.000266056	0.000327946	0.000110336	0.000150346	6.40718e-05	0.00048158	0.000551716	0.000165948	0.000266056	0.000327946	0.0001159	0.000150346	6.40718e-05	0.00048158	0.000596415	0.000165948	0.000369637	0.000443919	0.000257467	0.000407884	0.000247676	0.00048158	0.000502669	0.000165948	0.000266056	0.000327946	0.000110336	0.000150346	6.40718e-05	0.00048158	0.000551716	0.000165948	0.000266056	0.000327946	0.0001159	0.000150346	6.40718e-05	0.00048158	0.000596415	0.000165948
F13B	LOF	AD	F13B-AD	Inherited bleeding disorders	Hematologic	Factor XIIIB deficiency (613235) (AR)	0.000479271	8.95035e-05	0.000315856	5.04096e-05	3.7623e-05	3.28256e-05	0.00104357	0	0.000826749	0.00107627	0.000469023	0.00196753	0.00030058	0.000779086	0.00169242	0.000542245	0.000826749	0.00107627	0.000469023	0.002125	0.00037548	0.000912962	0.00179011	0.000846306	0.000479271	8.95035e-05	0.000315856	5.04096e-05	3.7623e-05	3.28256e-05	0.00104357	0	0.000826749	0.00107627	0.000469023	0.00196753	0.00030058	0.000779086	0.00169242	0.000542245	0.000826749	0.00107627	0.000469023
HNRNPU	LOF	AD	HNRNPU-AD	DDG2P	Congenital/Developmental	Developmental and epileptic encephalopathy 54 (617391) (AD)	0.000460936	0.000106363	0	0.000228637	5.71445e-05	7.33879e-05	0	6.96888e-05	0.000460936	0.000250371	0.000229689	0.000228637	0.0001592	0.000114949	0.000194454	6.96888e-05	0.000460936	0.000250371	0.000229689	0.000279032	0.0001592	0.000114949	0.000194454	6.96888e-05	0.000460936	0.000106363	0	0.000228637	5.71445e-05	7.33879e-05	0	6.96888e-05	0.000460936	0.000250371	0.000229689	0.000228637	0.0001592	0.000114949	0.000194454	6.96888e-05	0.000460936	0.000250371	0.000229689
HNRNPU	LOF	AD	HNRNPU-AD	Severe Paediatric Disorders	Severe Paediatric Disorders	Developmental and epileptic encephalopathy 54 (617391) (AD)	0.000460936	0.000106363	0	0.000228637	5.71445e-05	7.33879e-05	0	6.96888e-05	0.000460936	0.000250371	0.000229689	0.000228637	0.0001592	0.000114949	0.000194454	6.96888e-05	0.000460936	0.000250371	0.000229689	0.000279032	0.0001592	0.000114949	0.000194454	6.96888e-05	0.000460936	0.000106363	0	0.000228637	5.71445e-05	7.33879e-05	0	6.96888e-05	0.000460936	0.000250371	0.000229689	0.000228637	0.0001592	0.000114949	0.000194454	6.96888e-05	0.000460936	0.000250371	0.000229689
HNRNPU	LOF	AD	HNRNPU-AD	Early onset or syndromic epilepsy	Neurological	Developmental and epileptic encephalopathy 54 (617391) (AD)	0.000460936	0.000106363	0	0.000228637	5.71445e-05	7.33879e-05	0	6.96888e-05	0.000460936	0.000250371	0.000229689	0.000228637	0.0001592	0.000114949	0.000194454	6.96888e-05	0.000460936	0.000250371	0.000229689	0.000279032	0.0001592	0.000114949	0.000194454	6.96888e-05	0.000460936	0.000106363	0	0.000228637	5.71445e-05	7.33879e-05	0	6.96888e-05	0.000460936	0.000250371	0.000229689	0.000228637	0.0001592	0.000114949	0.000194454	6.96888e-05	0.000460936	0.000250371	0.000229689
ARFGEF1	LOF	AD	ARFGEF1-AD	DDG2P	Congenital/Developmental	Developmental delay, impaired speech, and behavioral abnormalities, with or without seizures (619964) (AD)	0.000457771	0.000138948	0	0.000107845	3.75185e-05	1.84744e-05	0.00011341	0.000134829	0.000809536	0.000459058	0.0002301	0.00229216	0.000226285	0.000377682	0.00178465	0.000873682	0.000809536	0.000459058	0.000317642	0.00239279	0.000263735	0.000500444	0.0020696	0.00099365	0.000457771	0.000138948	0	0.000107845	3.75185e-05	1.84744e-05	0.00011341	0.000134829	0.000809536	0.000459058	0.0002301	0.00229216	0.000226285	0.000377682	0.00178465	0.000873682	0.000809536	0.000459058	0.000317642
ARFGEF1	LOF	AD	ARFGEF1-AD	Early onset or syndromic epilepsy	Neurological	Developmental delay, impaired speech, and behavioral abnormalities, with or without seizures (619964) (AD)	0.000457771	0.000138948	0	0.000107845	3.75185e-05	1.84744e-05	0.00011341	0.000134829	0.000809536	0.000459058	0.0002301	0.00229216	0.000226285	0.000377682	0.00178465	0.000873682	0.000809536	0.000459058	0.000317642	0.00239279	0.000263735	0.000500444	0.0020696	0.00099365	0.000457771	0.000138948	0	0.000107845	3.75185e-05	1.84744e-05	0.00011341	0.000134829	0.000809536	0.000459058	0.0002301	0.00229216	0.000226285	0.000377682	0.00178465	0.000873682	0.000809536	0.000459058	0.000317642
HCN2	Both	AD	HCN2-AD	Severe Paediatric Disorders	Severe Paediatric Disorders	{Epilepsy, idiopathic generalized, susceptibility to, 17} (602477) (AD);Febrile seizures, familial, 2 (602477) (AD);Generalized epilepsy with febrile seizures plus, type 11 (602477) (AD)	0.000451977	0.00105749	0.000110187	0.000953991	0.000140954	0.00014655	0.00116189	0.000226389	0.000451977	0.00105749	0.000255277	0.00109968	0.000178877	0.000390966	0.00131036	0.000690404	0.000811462	0.00119848	0.000255277	0.0011662	0.000347295	0.000548336	0.00146813	0.000809874	0.000451977	0.00105749	0.000110187	0.000953991	0.000140954	0.00014655	0.00116189	0.000226389	0.000451977	0.00105749	0.000255277	0.00109968	0.000178877	0.000390966	0.00131036	0.000690404	0.000811462	0.00119848	0.000255277
HCN2	Both	AD	HCN2-AD	Early onset or syndromic epilepsy	Neurological	{Epilepsy, idiopathic generalized, susceptibility to, 17} (602477) (AD);Febrile seizures, familial, 2 (602477) (AD);Generalized epilepsy with febrile seizures plus, type 11 (602477) (AD)	0.000451977	0.00105749	0.000110187	0.000953991	0.000140954	0.00014655	0.00116189	0.000226389	0.000451977	0.00105749	0.000255277	0.00109968	0.000178877	0.000390966	0.00131036	0.000690404	0.000811462	0.00119848	0.000255277	0.0011662	0.000347295	0.000548336	0.00146813	0.000809874	0.000451977	0.00105749	0.000110187	0.000953991	0.000140954	0.00014655	0.00116189	0.000226389	0.000451977	0.00105749	0.000255277	0.00109968	0.000178877	0.000390966	0.00131036	0.000690404	0.000811462	0.00119848	0.000255277
F12	Both	AD	F12-AD	Vascular skin disorders	Skin	Angioedema, hereditary, 3 (610618) (AD);Factor XII deficiency (234000) (AR)	0.000451365	0.000182456	0.00980969	5.07421e-05	3.83605e-05	0.000649564	7.23037e-05	6.03118e-05	0.00114429	0.00032453	0.00988578	0.000415661	0.000267809	0.000913036	0.00086935	0.000540091	0.00114429	0.000875491	0.00988578	0.0010703	0.000267809	0.00123731	0.00117212	0.00078502	0.000451365	0.000182456	0.00980969	5.07421e-05	3.83605e-05	0.000649564	7.23037e-05	6.03118e-05	0.00114429	0.00032453	0.00988578	0.000415661	0.000267809	0.000913036	0.00086935	0.000540091	0.00114429	0.000875491	0.00988578
F12	Both	AD	F12-AD	Severe Paediatric Disorders	Severe Paediatric Disorders	Angioedema, hereditary, 3 (610618) (AD);Factor XII deficiency (234000) (AR)	0.000451365	0.000182456	0.00980969	5.07421e-05	3.83605e-05	0.000649564	7.23037e-05	6.03118e-05	0.00114429	0.00032453	0.00988578	0.000415661	0.000267809	0.000913036	0.00086935	0.000540091	0.00114429	0.000875491	0.00988578	0.0010703	0.000267809	0.00123731	0.00117212	0.00078502	0.000451365	0.000182456	0.00980969	5.07421e-05	3.83605e-05	0.000649564	7.23037e-05	6.03118e-05	0.00114429	0.00032453	0.00988578	0.000415661	0.000267809	0.000913036	0.00086935	0.000540091	0.00114429	0.000875491	0.00988578
F12	Both	AD	F12-AD	COVID-19 research	Immune System/Infectious	Angioedema, hereditary, 3 (610618) (AD);Factor XII deficiency (234000) (AR)	0.000451365	0.000182456	0.00980969	5.07421e-05	3.83605e-05	0.000649564	7.23037e-05	6.03118e-05	0.00114429	0.00032453	0.00988578	0.000415661	0.000267809	0.000913036	0.00086935	0.000540091	0.00114429	0.000875491	0.00988578	0.0010703	0.000267809	0.00123731	0.00117212	0.00078502	0.000451365	0.000182456	0.00980969	5.07421e-05	3.83605e-05	0.000649564	7.23037e-05	6.03118e-05	0.00114429	0.00032453	0.00988578	0.000415661	0.000267809	0.000913036	0.00086935	0.000540091	0.00114429	0.000875491	0.00988578
F12	Both	AD	F12-AD	Inherited bleeding disorders	Hematologic	Angioedema, hereditary, 3 (610618) (AD);Factor XII deficiency (234000) (AR)	0.000451365	0.000182456	0.00980969	5.07421e-05	3.83605e-05	0.000649564	7.23037e-05	6.03118e-05	0.00114429	0.00032453	0.00988578	0.000415661	0.000267809	0.000913036	0.00086935	0.000540091	0.00114429	0.000875491	0.00988578	0.0010703	0.000267809	0.00123731	0.00117212	0.00078502	0.000451365	0.000182456	0.00980969	5.07421e-05	3.83605e-05	0.000649564	7.23037e-05	6.03118e-05	0.00114429	0.00032453	0.00988578	0.000415661	0.000267809	0.000913036	0.00086935	0.000540091	0.00114429	0.000875491	0.00988578
GDF1	LOF	AD	GDF1-AD	Laterality disorders and isomerism	Congenital/Developmental	Congenital heart defects, multiple types, 6 (613854) (AD);Right atrial isomerism (Ivemark) (208530) (AR)	0.000438885	0.00011301	0	0.00028542	0.00230189	0.00261034	0.000202848	0.000420855	0.000438885	0.000768242	0.015586	0.00175902	0.00267587	0.0036159	0.000562436	0.00126414	0.000438885	0.000768242	0.015586	0.00214417	0.00267587	0.00394756	0.00068572	0.00144886	0.000438885	0.00011301	0	0.00028542	0.00230189	0.00261034	0.000202848	0.000420855	0.000438885	0.000768242	0.015586	0.00175902	0.00267587	0.0036159	0.000562436	0.00126414	0.000438885	0.000768242	0.015586
GDF1	LOF	AD	GDF1-AD	Paediatric disorders - additional genes	Congenital/Developmental	Congenital heart defects, multiple types, 6 (613854) (AD);Right atrial isomerism (Ivemark) (208530) (AR)	0.000438885	0.00011301	0	0.00028542	0.00230189	0.00261034	0.000202848	0.000420855	0.000438885	0.000768242	0.015586	0.00175902	0.00267587	0.0036159	0.000562436	0.00126414	0.000438885	0.000768242	0.015586	0.00214417	0.00267587	0.00394756	0.00068572	0.00144886	0.000438885	0.00011301	0	0.00028542	0.00230189	0.00261034	0.000202848	0.000420855	0.000438885	0.000768242	0.015586	0.00175902	0.00267587	0.0036159	0.000562436	0.00126414	0.000438885	0.000768242	0.015586
GDF1	LOF	AD	GDF1-AD	Familial non syndromic congenital heart disease	Ear	Congenital heart defects, multiple types, 6 (613854) (AD);Right atrial isomerism (Ivemark) (208530) (AR)	0.000438885	0.00011301	0	0.00028542	0.00230189	0.00261034	0.000202848	0.000420855	0.000438885	0.000768242	0.015586	0.00175902	0.00267587	0.0036159	0.000562436	0.00126414	0.000438885	0.000768242	0.015586	0.00214417	0.00267587	0.00394756	0.00068572	0.00144886	0.000438885	0.00011301	0	0.00028542	0.00230189	0.00261034	0.000202848	0.000420855	0.000438885	0.000768242	0.015586	0.00175902	0.00267587	0.0036159	0.000562436	0.00126414	0.000438885	0.000768242	0.015586
TRIO	LOF	AD	TRIO-AD	DDG2P	Congenital/Developmental	Intellectual developmental disorder, autosomal dominant 44, with microcephaly (617061) (AD);Intellectual developmental disorder, autosomal dominant 63, with macrocephaly (618825) (AD)	0.000433369	0.00130565	0.000861194	0.000206675	0.000273821	0.000185436	0.00101885	0.000246985	0.00078002	0.0019506	0.00144768	0.000616888	0.000677701	0.000655693	0.0025318	0.000778279	0.00078002	0.0020399	0.00152417	0.000918966	0.000677701	0.000850569	0.00276418	0.00113839	0.000433369	0.00130565	0.000861194	0.000206675	0.000273821	0.000185436	0.00101885	0.000246985	0.00078002	0.0019506	0.00144768	0.000616888	0.000677701	0.000655693	0.0025318	0.000778279	0.00078002	0.0020399	0.00152417
TRIO	LOF	AD	TRIO-AD	Severe Paediatric Disorders	Severe Paediatric Disorders	Intellectual developmental disorder, autosomal dominant 44, with microcephaly (617061) (AD);Intellectual developmental disorder, autosomal dominant 63, with macrocephaly (618825) (AD)	0.000433369	0.00130565	0.000861194	0.000206675	0.000273821	0.000185436	0.00101885	0.000246985	0.00078002	0.0019506	0.00144768	0.000616888	0.000677701	0.000655693	0.0025318	0.000778279	0.00078002	0.0020399	0.00152417	0.000918966	0.000677701	0.000850569	0.00276418	0.00113839	0.000433369	0.00130565	0.000861194	0.000206675	0.000273821	0.000185436	0.00101885	0.000246985	0.00078002	0.0019506	0.00144768	0.000616888	0.000677701	0.000655693	0.0025318	0.000778279	0.00078002	0.0020399	0.00152417
TRIO	LOF	AD	TRIO-AD	Severe microcephaly	Neurological	Intellectual developmental disorder, autosomal dominant 44, with microcephaly (617061) (AD);Intellectual developmental disorder, autosomal dominant 63, with macrocephaly (618825) (AD)	0.000433369	0.00130565	0.000861194	0.000206675	0.000273821	0.000185436	0.00101885	0.000246985	0.00078002	0.0019506	0.00144768	0.000616888	0.000677701	0.000655693	0.0025318	0.000778279	0.00078002	0.0020399	0.00152417	0.000918966	0.000677701	0.000850569	0.00276418	0.00113839	0.000433369	0.00130565	0.000861194	0.000206675	0.000273821	0.000185436	0.00101885	0.000246985	0.00078002	0.0019506	0.00144768	0.000616888	0.000677701	0.000655693	0.0025318	0.000778279	0.00078002	0.0020399	0.00152417
ESPN	LOF	AD	ESPN-AD	Monogenic hearing loss	Ear	?Usher syndrome, type 1M (618632) (AR);Deafness, autosomal recessive 36 (609006) (AR);Deafness, neurosensory, without vestibular involvement, autosomal dominant (609006) (AR)	0.000421852	0.000348371	0	0.000100761	5.70597e-05	0.000240461	0.000759922	5.98176e-05	0.000421852	0.000748876	0.000179654	0.00176583	5.70597e-05	0.000471343	0.00155051	0.000827941	0.000421852	0.00101695	0.00025928	0.00176583	5.70597e-05	0.000545301	0.00162345	0.000947309	0.000421852	0.000348371	0	0.000100761	5.70597e-05	0.000240461	0.000759922	5.98176e-05	0.000421852	0.000748876	0.000179654	0.00176583	5.70597e-05	0.000471343	0.00155051	0.000827941	0.000421852	0.00101695	0.00025928
POLE	LOF	AD	POLE-AD	Colorectal cancer pertinent cancer susceptibility	Neoplasm	{Colorectal cancer, susceptibility to, 12} (615083) (AD);FILS syndrome (615139) (AR);IMAGE-I syndrome (618336) (AR)	0.000405597	0.000783922	8.73859e-05	0.000405069	0.000155812	0.000596769	0.000629823	0.000552445	0.00179248	0.00225761	0.000858702	0.00191631	0.00112921	0.00201102	0.00160306	0.00235356	0.00219702	0.00250264	0.000858702	0.00197867	0.00138573	0.00223343	0.00165603	0.00249346	0.000405597	0.000783922	8.73859e-05	0.000405069	0.000155812	0.000596769	0.000629823	0.000552445	0.00179248	0.00225761	0.000858702	0.00191631	0.00112921	0.00201102	0.00160306	0.00235356	0.00219702	0.00250264	0.000858702
MSX1	LOF	AD	MSX1-AD	Fetal anomalies	Congenital/Developmental	Ectodermal dysplasia 3, Witkop type (189500) (AD);Orofacial cleft 5 (608874) (AD);Tooth agenesis, selective, 1, with or without orofacial cleft (106600) (AD)	0.0003944	0	0	0	0	1.79858e-06	0	0	0.0003944	8.94334e-05	8.73401e-05	0.000388751	0.000237851	8.7226e-05	0.000206875	5.97389e-05	0.0003944	0.000134147	8.73401e-05	0.000388751	0.000464304	0.000727266	0.000253237	0.000119474	0.0003944	0	0	0	0	1.79858e-06	0	0	0.0003944	8.94334e-05	8.73401e-05	0.000388751	0.000237851	8.7226e-05	0.000206875	5.97389e-05	0.0003944	0.000134147	8.73401e-05
MSX1	LOF	AD	MSX1-AD	Clefting	Skeletal/Connective Tissue	Ectodermal dysplasia 3, Witkop type (189500) (AD);Orofacial cleft 5 (608874) (AD);Tooth agenesis, selective, 1, with or without orofacial cleft (106600) (AD)	0.0003944	0	0	0	0	1.79858e-06	0	0	0.0003944	8.94334e-05	8.73401e-05	0.000388751	0.000237851	8.7226e-05	0.000206875	5.97389e-05	0.0003944	0.000134147	8.73401e-05	0.000388751	0.000464304	0.000727266	0.000253237	0.000119474	0.0003944	0	0	0	0	1.79858e-06	0	0	0.0003944	8.94334e-05	8.73401e-05	0.000388751	0.000237851	8.7226e-05	0.000206875	5.97389e-05	0.0003944	0.000134147	8.73401e-05
MSX1	LOF	AD	MSX1-AD	Severe Paediatric Disorders	Severe Paediatric Disorders	Ectodermal dysplasia 3, Witkop type (189500) (AD);Orofacial cleft 5 (608874) (AD);Tooth agenesis, selective, 1, with or without orofacial cleft (106600) (AD)	0.0003944	0	0	0	0	1.79858e-06	0	0	0.0003944	8.94334e-05	8.73401e-05	0.000388751	0.000237851	8.7226e-05	0.000206875	5.97389e-05	0.0003944	0.000134147	8.73401e-05	0.000388751	0.000464304	0.000727266	0.000253237	0.000119474	0.0003944	0	0	0	0	1.79858e-06	0	0	0.0003944	8.94334e-05	8.73401e-05	0.000388751	0.000237851	8.7226e-05	0.000206875	5.97389e-05	0.0003944	0.000134147	8.73401e-05
MSX1	LOF	AD	MSX1-AD	Ectodermal dysplasia	Skin	Ectodermal dysplasia 3, Witkop type (189500) (AD);Orofacial cleft 5 (608874) (AD);Tooth agenesis, selective, 1, with or without orofacial cleft (106600) (AD)	0.0003944	0	0	0	0	1.79858e-06	0	0	0.0003944	8.94334e-05	8.73401e-05	0.000388751	0.000237851	8.7226e-05	0.000206875	5.97389e-05	0.0003944	0.000134147	8.73401e-05	0.000388751	0.000464304	0.000727266	0.000253237	0.000119474	0.0003944	0	0	0	0	1.79858e-06	0	0	0.0003944	8.94334e-05	8.73401e-05	0.000388751	0.000237851	8.7226e-05	0.000206875	5.97389e-05	0.0003944	0.000134147	8.73401e-05
SCN4A	Both	AD	SCN4A-AD	Fetal anomalies	Congenital/Developmental	Congenital myopathy 22A, classic (620351) (AR);Congenital myopathy 22B, severe fetal (620369) (AR);Hyperkalemic periodic paralysis (170500) (AD);Hypokalemic periodic paralysis, type 2 (613345) (AD);Myasthenic syndrome, congenital, 16 (614198) (AR);Myotonia congenita, atypical, acetazolamide-responsive (608390) (AD);Paramyotonia congenita (168300) (AD)	0.000389181	0.000514333	7.65199e-05	0.000354444	0.00157252	0.000440024	0.000443708	0.000299777	0.00142954	0.00127751	0.000552937	0.00136806	0.0036684	0.00153227	0.00173569	0.00174916	0.00527729	0.00294468	0.00379143	0.00316508	0.00438346	0.00351462	0.00487716	0.00378809	0.000389181	0.000514333	7.65199e-05	0.000354444	0.00157252	0.000440024	0.000443708	0.000299777	0.00142954	0.00127751	0.000552937	0.00136806	0.0036684	0.00153227	0.00173569	0.00174916	0.00527729	0.00294468	0.00379143
SCN4A	Both	AD	SCN4A-AD	Severe Paediatric Disorders	Severe Paediatric Disorders	Congenital myopathy 22A, classic (620351) (AR);Congenital myopathy 22B, severe fetal (620369) (AR);Hyperkalemic periodic paralysis (170500) (AD);Hypokalemic periodic paralysis, type 2 (613345) (AD);Myasthenic syndrome, congenital, 16 (614198) (AR);Myotonia congenita, atypical, acetazolamide-responsive (608390) (AD);Paramyotonia congenita (168300) (AD)	0.000389181	0.000514333	7.65199e-05	0.000354444	0.00157252	0.000440024	0.000443708	0.000299777	0.00142954	0.00127751	0.000552937	0.00136806	0.0036684	0.00153227	0.00173569	0.00174916	0.00527729	0.00294468	0.00379143	0.00316508	0.00438346	0.00351462	0.00487716	0.00378809	0.000389181	0.000514333	7.65199e-05	0.000354444	0.00157252	0.000440024	0.000443708	0.000299777	0.00142954	0.00127751	0.000552937	0.00136806	0.0036684	0.00153227	0.00173569	0.00174916	0.00527729	0.00294468	0.00379143
SCN4A	Both	AD	SCN4A-AD	Skeletal Muscle Channelopathies	Neuromuscular	Congenital myopathy 22A, classic (620351) (AR);Congenital myopathy 22B, severe fetal (620369) (AR);Hyperkalemic periodic paralysis (170500) (AD);Hypokalemic periodic paralysis, type 2 (613345) (AD);Myasthenic syndrome, congenital, 16 (614198) (AR);Myotonia congenita, atypical, acetazolamide-responsive (608390) (AD);Paramyotonia congenita (168300) (AD)	0.000389181	0.000514333	7.65199e-05	0.000354444	0.00157252	0.000440024	0.000443708	0.000299777	0.00142954	0.00127751	0.000552937	0.00136806	0.0036684	0.00153227	0.00173569	0.00174916	0.00527729	0.00294468	0.00379143	0.00316508	0.00438346	0.00351462	0.00487716	0.00378809	0.000389181	0.000514333	7.65199e-05	0.000354444	0.00157252	0.000440024	0.000443708	0.000299777	0.00142954	0.00127751	0.000552937	0.00136806	0.0036684	0.00153227	0.00173569	0.00174916	0.00527729	0.00294468	0.00379143
QRICH1	LOF	AD	QRICH1-AD	Fetal anomalies	Congenital/Developmental	Ververi-Brady syndrome (617982) (AD)	0.000387822	0	0	5.53113e-05	7.49008e-05	1.44902e-05	0	0	0.000387822	9.00127e-05	0.000158277	0.0001584	7.49008e-05	7.43876e-05	0.000266727	0.000124241	0.000387822	0.000241765	0.000240653	0.000310048	0.000187258	0.000185392	0.000291557	0.000186436	0.000387822	0	0	5.53113e-05	7.49008e-05	1.44902e-05	0	0	0.000387822	9.00127e-05	0.000158277	0.0001584	7.49008e-05	7.43876e-05	0.000266727	0.000124241	0.000387822	0.000241765	0.000240653
QRICH1	LOF	AD	QRICH1-AD	Severe Paediatric Disorders	Severe Paediatric Disorders	Ververi-Brady syndrome (617982) (AD)	0.000387822	0	0	5.53113e-05	7.49008e-05	1.44902e-05	0	0	0.000387822	9.00127e-05	0.000158277	0.0001584	7.49008e-05	7.43876e-05	0.000266727	0.000124241	0.000387822	0.000241765	0.000240653	0.000310048	0.000187258	0.000185392	0.000291557	0.000186436	0.000387822	0	0	5.53113e-05	7.49008e-05	1.44902e-05	0	0	0.000387822	9.00127e-05	0.000158277	0.0001584	7.49008e-05	7.43876e-05	0.000266727	0.000124241	0.000387822	0.000241765	0.000240653
QRICH1	LOF	AD	QRICH1-AD	Intellectual disability - microarray and sequencing	Neurological	Ververi-Brady syndrome (617982) (AD)	0.000387822	0	0	5.53113e-05	7.49008e-05	1.44902e-05	0	0	0.000387822	9.00127e-05	0.000158277	0.0001584	7.49008e-05	7.43876e-05	0.000266727	0.000124241	0.000387822	0.000241765	0.000240653	0.000310048	0.000187258	0.000185392	0.000291557	0.000186436	0.000387822	0	0	5.53113e-05	7.49008e-05	1.44902e-05	0	0	0.000387822	9.00127e-05	0.000158277	0.0001584	7.49008e-05	7.43876e-05	0.000266727	0.000124241	0.000387822	0.000241765	0.000240653
KCNH2	LOF	AD	KCNH2-AD	Short QT syndrome	Cardiovascular	Long QT syndrome 2 (613688) (AD);Short QT syndrome 1 (609620);Long QT syndrome 2 (613688) (AD);Short QT syndrome 1 (609620)	0.000381025	0.000256445	0.000372925	0.000101475	0.00191008	0.000332715	0.000235171	0.000119471	0.00144534	0.000610381	0.00267704	0.00145641	0.00253799	0.00100713	0.000978239	0.000358366	0.00400987	0.00210308	0.0032919	0.00279017	0.00507087	0.00268332	0.0024452	0.00193899	0.000381025	0.000256445	0.000372925	0.000101475	0.00191008	0.000332715	0.000235171	0.000119471	0.00144534	0.000610381	0.00267704	0.00145641	0.00253799	0.00100713	0.000978239	0.000358366	0.00400987	0.00210308	0.0032919
MYH10	LOF	AD	MYH10-AD	Fetal anomalies	Congenital/Developmental	-	0.000377715	0.000134351	0	0	7.49584e-05	1.64217e-05	0.000139295	0	0.000377715	0.000269874	0.000387909	0	0.000265868	0.000175592	0.000717209	0.000185339	0.000724385	0.00083119	0.00237963	0.000101234	0.000378343	0.000323284	0.00114304	0.000427855	0.000377715	0.000134351	0	0	7.49584e-05	1.64217e-05	0.000139295	0	0.000377715	0.000269874	0.000387909	0	0.000265868	0.000175592	0.000717209	0.000185339	0.000724385	0.00083119	0.00237963
MYH10	LOF	AD	MYH10-AD	Severe Paediatric Disorders	Severe Paediatric Disorders	-	0.000377715	0.000134351	0	0	7.49584e-05	1.64217e-05	0.000139295	0	0.000377715	0.000269874	0.000387909	0	0.000265868	0.000175592	0.000717209	0.000185339	0.000724385	0.00083119	0.00237963	0.000101234	0.000378343	0.000323284	0.00114304	0.000427855	0.000377715	0.000134351	0	0	7.49584e-05	1.64217e-05	0.000139295	0	0.000377715	0.000269874	0.000387909	0	0.000265868	0.000175592	0.000717209	0.000185339	0.000724385	0.00083119	0.00237963
MYH7	LOF	AD	MYH7-AD	Fetal anomalies	Congenital/Developmental	Cardiomyopathy, dilated, 1S (613426) (AD);Cardiomyopathy, hypertrophic, 1 (192600) (AD, DD);Congenital myopathy 7A, myosin storage, autosomal dominant (608358) (AD);Congenital myopathy 7B, myosin storage, autosomal recessive (255160) (AR);Laing distal myopathy (160500) (AD);Left ventricular noncompaction 5 (613426) (AD);Cardiomyopathy, dilated, 1S (613426) (AD);Cardiomyopathy, hypertrophic, 1 (19…	0.000375446	0.00067056	0.000841397	0.00156089	0.00127881	0.00126549	0.000880845	0.000358384	0.0046184	0.00223567	0.00114718	0.00291804	0.00213913	0.00301221	0.00245502	0.00179061	0.00897851	0.00638376	0.0024464	0.00698071	0.00378289	0.00751392	0.00726294	0.007442	0.000375446	0.00067056	0.000841397	0.00156089	0.00127881	0.00126549	0.000880845	0.000358384	0.0046184	0.00223567	0.00114718	0.00291804	0.00213913	0.00301221	0.00245502	0.00179061	0.00897851	0.00638376	0.0024464
MYH7	LOF	AD	MYH7-AD	Severe Paediatric Disorders	Severe Paediatric Disorders	Cardiomyopathy, dilated, 1S (613426) (AD);Cardiomyopathy, hypertrophic, 1 (192600) (AD, DD);Congenital myopathy 7A, myosin storage, autosomal dominant (608358) (AD);Congenital myopathy 7B, myosin storage, autosomal recessive (255160) (AR);Laing distal myopathy (160500) (AD);Left ventricular noncompaction 5 (613426) (AD);Cardiomyopathy, dilated, 1S (613426) (AD);Cardiomyopathy, hypertrophic, 1 (19…	0.000375446	0.00067056	0.000841397	0.00156089	0.00127881	0.00126549	0.000880845	0.000358384	0.0046184	0.00223567	0.00114718	0.00291804	0.00213913	0.00301221	0.00245502	0.00179061	0.00897851	0.00638376	0.0024464	0.00698071	0.00378289	0.00751392	0.00726294	0.007442	0.000375446	0.00067056	0.000841397	0.00156089	0.00127881	0.00126549	0.000880845	0.000358384	0.0046184	0.00223567	0.00114718	0.00291804	0.00213913	0.00301221	0.00245502	0.00179061	0.00897851	0.00638376	0.0024464
MYH7	LOF	AD	MYH7-AD	Distal myopathies	Neuromuscular	Cardiomyopathy, dilated, 1S (613426) (AD);Cardiomyopathy, hypertrophic, 1 (192600) (AD, DD);Congenital myopathy 7A, myosin storage, autosomal dominant (608358) (AD);Congenital myopathy 7B, myosin storage, autosomal recessive (255160) (AR);Laing distal myopathy (160500) (AD);Left ventricular noncompaction 5 (613426) (AD);Cardiomyopathy, dilated, 1S (613426) (AD);Cardiomyopathy, hypertrophic, 1 (19…	0.000375446	0.00067056	0.000841397	0.00156089	0.00127881	0.00126549	0.000880845	0.000358384	0.0046184	0.00223567	0.00114718	0.00291804	0.00213913	0.00301221	0.00245502	0.00179061	0.00897851	0.00638376	0.0024464	0.00698071	0.00378289	0.00751392	0.00726294	0.007442	0.000375446	0.00067056	0.000841397	0.00156089	0.00127881	0.00126549	0.000880845	0.000358384	0.0046184	0.00223567	0.00114718	0.00291804	0.00213913	0.00301221	0.00245502	0.00179061	0.00897851	0.00638376	0.0024464
MYH7	LOF	AD	MYH7-AD	Left Ventricular Noncompaction Cardiomyopathy	Cardiovascular	Cardiomyopathy, dilated, 1S (613426) (AD);Cardiomyopathy, hypertrophic, 1 (192600) (AD, DD);Congenital myopathy 7A, myosin storage, autosomal dominant (608358) (AD);Congenital myopathy 7B, myosin storage, autosomal recessive (255160) (AR);Laing distal myopathy (160500) (AD);Left ventricular noncompaction 5 (613426) (AD);Cardiomyopathy, dilated, 1S (613426) (AD);Cardiomyopathy, hypertrophic, 1 (19…	0.000375446	0.00067056	0.000841397	0.00156089	0.00127881	0.00126549	0.000880845	0.000358384	0.0046184	0.00223567	0.00114718	0.00291804	0.00213913	0.00301221	0.00245502	0.00179061	0.00897851	0.00638376	0.0024464	0.00698071	0.00378289	0.00751392	0.00726294	0.007442	0.000375446	0.00067056	0.000841397	0.00156089	0.00127881	0.00126549	0.000880845	0.000358384	0.0046184	0.00223567	0.00114718	0.00291804	0.00213913	0.00301221	0.00245502	0.00179061	0.00897851	0.00638376	0.0024464
MYH7	LOF	AD	MYH7-AD	Paediatric disorders - additional genes	Cardiovascular	Cardiomyopathy, dilated, 1S (613426) (AD);Cardiomyopathy, hypertrophic, 1 (192600) (AD, DD);Congenital myopathy 7A, myosin storage, autosomal dominant (608358) (AD);Congenital myopathy 7B, myosin storage, autosomal recessive (255160) (AR);Laing distal myopathy (160500) (AD);Left ventricular noncompaction 5 (613426) (AD);Cardiomyopathy, dilated, 1S (613426) (AD);Cardiomyopathy, hypertrophic, 1 (19…	0.000375446	0.00067056	0.000841397	0.00156089	0.00127881	0.00126549	0.000880845	0.000358384	0.0046184	0.00223567	0.00114718	0.00291804	0.00213913	0.00301221	0.00245502	0.00179061	0.00897851	0.00638376	0.0024464	0.00698071	0.00378289	0.00751392	0.00726294	0.007442	0.000375446	0.00067056	0.000841397	0.00156089	0.00127881	0.00126549	0.000880845	0.000358384	0.0046184	0.00223567	0.00114718	0.00291804	0.00213913	0.00301221	0.00245502	0.00179061	0.00897851	0.00638376	0.0024464
CEACAM16	LOF	AD	CEACAM16-AD	Monogenic hearing loss	Ear	Deafness, autosomal dominant 4B (614614) (AD);Deafness, autosomal recessive 113 (618410) (AR)	0.000371402	4.47177e-05	0	0	0	0.000101491	0.000607668	0	0.00142146	0.000318873	0	5.14258e-05	0.000137255	0.000278251	0.00084928	5.97354e-05	0.00142146	0.000408732	0	0.00010582	0.000137255	0.00031833	0.000872478	5.97354e-05	0.000371402	4.47177e-05	0	0	0	0.000101491	0.000607668	0	0.00142146	0.000318873	0	5.14258e-05	0.000137255	0.000278251	0.00084928	5.97354e-05	0.00142146	0.000408732	0
WFS1	LOF	AD	WFS1-AD	DDG2P	Congenital/Developmental	?Cataract 41 (116400) (AD);{Diabetes mellitus, noninsulin-dependent, association with} (125853) (AD);Deafness, autosomal dominant 6/14/38 (600965) (AD);Wolfram syndrome 1 (222300) (AR);Wolfram-like syndrome, autosomal dominant (614296) (AD);?Cataract 41 (116400) (AD);{Diabetes mellitus, noninsulin-dependent, association with} (125853) (AD);Deafness, autosomal dominant 6/14/38 (600965) (AD);Wolfra…	0.000364631	0.00189058	0.000229542	0.00141136	0.000688629	0.00154686	0.000889662	0.00125583	0.00451995	0.00444261	0.0276157	0.00387401	0.00321229	0.00514681	0.00297559	0.00399878	0.00831062	0.00644537	0.0318459	0.0063834	0.00385827	0.00734268	0.00671604	0.00584158	0.000364631	0.00189058	0.000229542	0.00141136	0.000688629	0.00154686	0.000889662	0.00125583	0.00451995	0.00444261	0.0276157	0.00387401	0.00321229	0.00514681	0.00297559	0.00399878	0.00831062	0.00644537	0.0318459
WFS1	LOF	AD	WFS1-AD	Severe Paediatric Disorders	Severe Paediatric Disorders	?Cataract 41 (116400) (AD);{Diabetes mellitus, noninsulin-dependent, association with} (125853) (AD);Deafness, autosomal dominant 6/14/38 (600965) (AD);Wolfram syndrome 1 (222300) (AR);Wolfram-like syndrome, autosomal dominant (614296) (AD);?Cataract 41 (116400) (AD);{Diabetes mellitus, noninsulin-dependent, association with} (125853) (AD);Deafness, autosomal dominant 6/14/38 (600965) (AD);Wolfra…	0.000364631	0.00189058	0.000229542	0.00141136	0.000688629	0.00154686	0.000889662	0.00125583	0.00451995	0.00444261	0.0276157	0.00387401	0.00321229	0.00514681	0.00297559	0.00399878	0.00831062	0.00644537	0.0318459	0.0063834	0.00385827	0.00734268	0.00671604	0.00584158	0.000364631	0.00189058	0.000229542	0.00141136	0.000688629	0.00154686	0.000889662	0.00125583	0.00451995	0.00444261	0.0276157	0.00387401	0.00321229	0.00514681	0.00297559	0.00399878	0.00831062	0.00644537	0.0318459
WFS1	LOF	AD	WFS1-AD	Undiagnosed metabolic disorders	Metabolic	?Cataract 41 (116400) (AD);{Diabetes mellitus, noninsulin-dependent, association with} (125853) (AD);Deafness, autosomal dominant 6/14/38 (600965) (AD);Wolfram syndrome 1 (222300) (AR);Wolfram-like syndrome, autosomal dominant (614296) (AD);?Cataract 41 (116400) (AD);{Diabetes mellitus, noninsulin-dependent, association with} (125853) (AD);Deafness, autosomal dominant 6/14/38 (600965) (AD);Wolfra…	0.000364631	0.00189058	0.000229542	0.00141136	0.000688629	0.00154686	0.000889662	0.00125583	0.00451995	0.00444261	0.0276157	0.00387401	0.00321229	0.00514681	0.00297559	0.00399878	0.00831062	0.00644537	0.0318459	0.0063834	0.00385827	0.00734268	0.00671604	0.00584158	0.000364631	0.00189058	0.000229542	0.00141136	0.000688629	0.00154686	0.000889662	0.00125583	0.00451995	0.00444261	0.0276157	0.00387401	0.00321229	0.00514681	0.00297559	0.00399878	0.00831062	0.00644537	0.0318459
WFS1	LOF	AD	WFS1-AD	Bilateral congenital or childhood onset cataracts	Eye	?Cataract 41 (116400) (AD);{Diabetes mellitus, noninsulin-dependent, association with} (125853) (AD);Deafness, autosomal dominant 6/14/38 (600965) (AD);Wolfram syndrome 1 (222300) (AR);Wolfram-like syndrome, autosomal dominant (614296) (AD);?Cataract 41 (116400) (AD);{Diabetes mellitus, noninsulin-dependent, association with} (125853) (AD);Deafness, autosomal dominant 6/14/38 (600965) (AD);Wolfra…	0.000364631	0.00189058	0.000229542	0.00141136	0.000688629	0.00154686	0.000889662	0.00125583	0.00451995	0.00444261	0.0276157	0.00387401	0.00321229	0.00514681	0.00297559	0.00399878	0.00831062	0.00644537	0.0318459	0.0063834	0.00385827	0.00734268	0.00671604	0.00584158	0.000364631	0.00189058	0.000229542	0.00141136	0.000688629	0.00154686	0.000889662	0.00125583	0.00451995	0.00444261	0.0276157	0.00387401	0.00321229	0.00514681	0.00297559	0.00399878	0.00831062	0.00644537	0.0318459
WFS1	LOF	AD	WFS1-AD	Neonatal diabetes	Endocrine	?Cataract 41 (116400) (AD);{Diabetes mellitus, noninsulin-dependent, association with} (125853) (AD);Deafness, autosomal dominant 6/14/38 (600965) (AD);Wolfram syndrome 1 (222300) (AR);Wolfram-like syndrome, autosomal dominant (614296) (AD);?Cataract 41 (116400) (AD);{Diabetes mellitus, noninsulin-dependent, association with} (125853) (AD);Deafness, autosomal dominant 6/14/38 (600965) (AD);Wolfra…	0.000364631	0.00189058	0.000229542	0.00141136	0.000688629	0.00154686	0.000889662	0.00125583	0.00451995	0.00444261	0.0276157	0.00387401	0.00321229	0.00514681	0.00297559	0.00399878	0.00831062	0.00644537	0.0318459	0.0063834	0.00385827	0.00734268	0.00671604	0.00584158	0.000364631	0.00189058	0.000229542	0.00141136	0.000688629	0.00154686	0.000889662	0.00125583	0.00451995	0.00444261	0.0276157	0.00387401	0.00321229	0.00514681	0.00297559	0.00399878	0.00831062	0.00644537	0.0318459
WFS1	LOF	AD	WFS1-AD	Monogenic hearing loss	Ear	?Cataract 41 (116400) (AD);{Diabetes mellitus, noninsulin-dependent, association with} (125853) (AD);Deafness, autosomal dominant 6/14/38 (600965) (AD);Wolfram syndrome 1 (222300) (AR);Wolfram-like syndrome, autosomal dominant (614296) (AD);?Cataract 41 (116400) (AD);{Diabetes mellitus, noninsulin-dependent, association with} (125853) (AD);Deafness, autosomal dominant 6/14/38 (600965) (AD);Wolfra…	0.000364631	0.00189058	0.000229542	0.00141136	0.000688629	0.00154686	0.000889662	0.00125583	0.00451995	0.00444261	0.0276157	0.00387401	0.00321229	0.00514681	0.00297559	0.00399878	0.00831062	0.00644537	0.0318459	0.0063834	0.00385827	0.00734268	0.00671604	0.00584158	0.000364631	0.00189058	0.000229542	0.00141136	0.000688629	0.00154686	0.000889662	0.00125583	0.00451995	0.00444261	0.0276157	0.00387401	0.00321229	0.00514681	0.00297559	0.00399878	0.00831062	0.00644537	0.0318459
BFSP2	LOF	AD	BFSP2-AD	Fetal anomalies	Congenital/Developmental	Cataract 12, multiple types (611597) (AD)	0.000363702	0.000223577	7.66313e-05	0.000151125	0.000345781	0.000201999	0.000324625	0	0.001403	0.00031299	0.00030622	0.000201499	0.000383276	0.000507666	0.000463753	0.000238931	0.001403	0.00031299	0.00030622	0.000554809	0.000383276	0.000723374	0.000463753	0.00035843	0.000363702	0.000223577	7.66313e-05	0.000151125	0.000345781	0.000201999	0.000324625	0	0.001403	0.00031299	0.00030622	0.000201499	0.000383276	0.000507666	0.000463753	0.000238931	0.001403	0.00031299	0.00030622
BFSP2	LOF	AD	BFSP2-AD	Severe Paediatric Disorders	Severe Paediatric Disorders	Cataract 12, multiple types (611597) (AD)	0.000363702	0.000223577	7.66313e-05	0.000151125	0.000345781	0.000201999	0.000324625	0	0.001403	0.00031299	0.00030622	0.000201499	0.000383276	0.000507666	0.000463753	0.000238931	0.001403	0.00031299	0.00030622	0.000554809	0.000383276	0.000723374	0.000463753	0.00035843	0.000363702	0.000223577	7.66313e-05	0.000151125	0.000345781	0.000201999	0.000324625	0	0.001403	0.00031299	0.00030622	0.000201499	0.000383276	0.000507666	0.000463753	0.000238931	0.001403	0.00031299	0.00030622
BFSP2	LOF	AD	BFSP2-AD	Bilateral congenital or childhood onset cataracts	Eye	Cataract 12, multiple types (611597) (AD)	0.000363702	0.000223577	7.66313e-05	0.000151125	0.000345781	0.000201999	0.000324625	0	0.001403	0.00031299	0.00030622	0.000201499	0.000383276	0.000507666	0.000463753	0.000238931	0.001403	0.00031299	0.00030622	0.000554809	0.000383276	0.000723374	0.000463753	0.00035843	0.000363702	0.000223577	7.66313e-05	0.000151125	0.000345781	0.000201999	0.000324625	0	0.001403	0.00031299	0.00030622	0.000201499	0.000383276	0.000507666	0.000463753	0.000238931	0.001403	0.00031299	0.00030622
KRT17	LOF	AD	KRT17-AD	Severe Paediatric Disorders	Severe Paediatric Disorders	Pachyonychia congenita 2 (167210) (AD);Steatocystoma multiplex (184500) (AD)	0.000360815	0	0	5.03867e-05	3.74413e-05	4.31755e-05	9.28037e-05	0	0.000828702	8.94454e-05	0	0.000251868	0.000187219	0.000106129	0.000232034	0.000239353	0.00214402	0.00143021	0	0.000302231	0.000336942	0.000214035	0.000533651	0.000299195	0.000360815	0	0	5.03867e-05	3.74413e-05	4.31755e-05	9.28037e-05	0	0.000828702	8.94454e-05	0	0.000251868	0.000187219	0.000106129	0.000232034	0.000239353	0.00214402	0.00143021	0
KRT17	LOF	AD	KRT17-AD	Palmoplantar keratoderma and erythrokeratodermas	Skin	Pachyonychia congenita 2 (167210) (AD);Steatocystoma multiplex (184500) (AD)	0.000360815	0	0	5.03867e-05	3.74413e-05	4.31755e-05	9.28037e-05	0	0.000828702	8.94454e-05	0	0.000251868	0.000187219	0.000106129	0.000232034	0.000239353	0.00214402	0.00143021	0	0.000302231	0.000336942	0.000214035	0.000533651	0.000299195	0.000360815	0	0	5.03867e-05	3.74413e-05	4.31755e-05	9.28037e-05	0	0.000828702	8.94454e-05	0	0.000251868	0.000187219	0.000106129	0.000232034	0.000239353	0.00214402	0.00143021	0
MYLK	LOF	AD	MYLK-AD	Thoracic aortic aneurysm or dissection GMS	Cardiovascular	Aortic aneurysm, familial thoracic 7 (613780) (AD);Megacystis-microcolon-intestinal hypoperistalsis syndrome 1 (249210) (AR)	0.000358744	8.94334e-05	7.65316e-05	5.03766e-05	0	7.01591e-05	6.96258e-05	7.28943e-05	0.0007053	0.000538542	7.65316e-05	0.000402949	0.000233314	0.000431273	0.000783285	0.000796055	0.00105174	0.000896233	0.000994313	0.00166117	0.000233314	0.00170868	0.001181	0.00133325	0.000358744	8.94334e-05	7.65316e-05	5.03766e-05	0	7.01591e-05	6.96258e-05	7.28943e-05	0.0007053	0.000538542	7.65316e-05	0.000402949	0.000233314	0.000431273	0.000783285	0.000796055	0.00105174	0.000896233	0.000994313
CRYBB3	LOF	AD	CRYBB3-AD	Fetal anomalies	Congenital/Developmental	Cataract 22 (609741) (AD, AR)	0.000357462	4.47217e-05	7.6555e-05	0.0037744	0	3.41801e-05	0.000255146	5.9814e-05	0.00312751	0.000313024	0.000153075	0.00487813	7.49106e-05	0.000223029	0.000811429	0.00512445	0.00416465	0.00218903	0.0359854	0.00552965	0.000563469	0.00146494	0.00190007	0.0125254	0.000357462	4.47217e-05	7.6555e-05	0.0037744	0	3.41801e-05	0.000255146	5.9814e-05	0.00312751	0.000313024	0.000153075	0.00487813	7.49106e-05	0.000223029	0.000811429	0.00512445	0.00416465	0.00218903	0.0359854
CRYBB3	LOF	AD	CRYBB3-AD	Severe Paediatric Disorders	Severe Paediatric Disorders	Cataract 22 (609741) (AD, AR)	0.000357462	4.47217e-05	7.6555e-05	0.0037744	0	3.41801e-05	0.000255146	5.9814e-05	0.00312751	0.000313024	0.000153075	0.00487813	7.49106e-05	0.000223029	0.000811429	0.00512445	0.00416465	0.00218903	0.0359854	0.00552965	0.000563469	0.00146494	0.00190007	0.0125254	0.000357462	4.47217e-05	7.6555e-05	0.0037744	0	3.41801e-05	0.000255146	5.9814e-05	0.00312751	0.000313024	0.000153075	0.00487813	7.49106e-05	0.000223029	0.000811429	0.00512445	0.00416465	0.00218903	0.0359854
CRYBB3	LOF	AD	CRYBB3-AD	Bilateral congenital or childhood onset cataracts	Eye	Cataract 22 (609741) (AD, AR)	0.000357462	4.47217e-05	7.6555e-05	0.0037744	0	3.41801e-05	0.000255146	5.9814e-05	0.00312751	0.000313024	0.000153075	0.00487813	7.49106e-05	0.000223029	0.000811429	0.00512445	0.00416465	0.00218903	0.0359854	0.00552965	0.000563469	0.00146494	0.00190007	0.0125254	0.000357462	4.47217e-05	7.6555e-05	0.0037744	0	3.41801e-05	0.000255146	5.9814e-05	0.00312751	0.000313024	0.000153075	0.00487813	7.49106e-05	0.000223029	0.000811429	0.00512445	0.00416465	0.00218903	0.0359854
CDK19	Both	AD	CDK19-AD	DDG2P	Congenital/Developmental	Developmental and epileptic encephalopathy 87 (618916) (AD)	0.000357462	0	0	0	0	2.11331e-06	2.47792e-05	0	0.000357462	0.00012115	7.90045e-05	5.04121e-05	0.000116586	8.46248e-05	0.00016926	0.000119485	0.000357462	0.000210595	0.000156974	0.000102273	0.000155114	0.000201869	0.000193385	0.000368715	0.000357462	0	0	0	0	2.11331e-06	2.47792e-05	0	0.000357462	0.00012115	7.90045e-05	5.04121e-05	0.000116586	8.46248e-05	0.00016926	0.000119485	0.000357462	0.000210595	0.000156974
CDK19	Both	AD	CDK19-AD	Early onset or syndromic epilepsy	Neurological	Developmental and epileptic encephalopathy 87 (618916) (AD)	0.000357462	0	0	0	0	2.11331e-06	2.47792e-05	0	0.000357462	0.00012115	7.90045e-05	5.04121e-05	0.000116586	8.46248e-05	0.00016926	0.000119485	0.000357462	0.000210595	0.000156974	0.000102273	0.000155114	0.000201869	0.000193385	0.000368715	0.000357462	0	0	0	0	2.11331e-06	2.47792e-05	0	0.000357462	0.00012115	7.90045e-05	5.04121e-05	0.000116586	8.46248e-05	0.00016926	0.000119485	0.000357462	0.000210595	0.000156974
VDR	LOF	AD	VDR-AD	Severe Paediatric Disorders	Severe Paediatric Disorders	Rickets, vitamin D-resistant, type IIA (277440) (AR)	0.000357207	0	0	0	0.000112321	2.69989e-05	9.27482e-05	5.97354e-05	0.000357207	0.00044763	0	0.000258999	0.000224666	0.000179113	0.000394109	0.000545536	0.00208891	0.00112604	0.000994653	0.000967455	0.000864616	0.000594482	0.000859396	0.00108275	0.000357207	0	0	0	0.000112321	2.69989e-05	9.27482e-05	5.97354e-05	0.000357207	0.00044763	0	0.000258999	0.000224666	0.000179113	0.000394109	0.000545536	0.00208891	0.00112604	0.000994653
COMP	LOF	AD	COMP-AD	Multiple Epiphyseal Dysplasia	Skeletal/Connective Tissue	Carpal tunnel syndrome 2 (619161) (AD);Epiphyseal dysplasia, multiple, 1 (132400) (AD);Pseudoachondroplasia (177170) (AD)	0.000356189	0.000178883	0	0	0	0.000228613	0.000139139	0.000298859	0.00209546	0.00120761	0.00176968	0.0017757	0.00257525	0.00178834	0.00213927	0.00101741	0.00624279	0.00570921	0.00695048	0.00574348	0.00304189	0.00409932	0.00492021	0.00346406	0.000356189	0.000178883	0	0	0	0.000228613	0.000139139	0.000298859	0.00209546	0.00120761	0.00176968	0.0017757	0.00257525	0.00178834	0.00213927	0.00101741	0.00624279	0.00570921	0.00695048
COMP	LOF	AD	COMP-AD	Severe Paediatric Disorders	Severe Paediatric Disorders	Carpal tunnel syndrome 2 (619161) (AD);Epiphyseal dysplasia, multiple, 1 (132400) (AD);Pseudoachondroplasia (177170) (AD)	0.000356189	0.000178883	0	0	0	0.000228613	0.000139139	0.000298859	0.00209546	0.00120761	0.00176968	0.0017757	0.00257525	0.00178834	0.00213927	0.00101741	0.00624279	0.00570921	0.00695048	0.00574348	0.00304189	0.00409932	0.00492021	0.00346406	0.000356189	0.000178883	0	0	0	0.000228613	0.000139139	0.000298859	0.00209546	0.00120761	0.00176968	0.0017757	0.00257525	0.00178834	0.00213927	0.00101741	0.00624279	0.00570921	0.00695048
TNNI3	LOF	AD	TNNI3-AD	Hypertrophic cardiomyopathy	Cardiovascular	?Cardiomyopathy, dilated, 2A (611880) (AR);Cardiomyopathy, dilated, 1FF (613286);Cardiomyopathy, familial restrictive, 1 (115210) (AD);Cardiomyopathy, hypertrophic, 7 (613690) (AD)	0.000355177	0.000313186	0	0.000353602	0	0.00012949	0.000232099	0.000238956	0.00140408	0.000814474	0.00022956	0.000558319	7.60256e-05	0.000420245	0.000700744	0.000778616	0.00278957	0.000903834	0.00022956	0.000659013	0.000226229	0.000614438	0.000978752	0.000778616	0.000355177	0.000313186	0	0.000353602	0	0.00012949	0.000232099	0.000238956	0.00140408	0.000814474	0.00022956	0.000558319	7.60256e-05	0.000420245	0.000700744	0.000778616	0.00278957	0.000903834	0.00022956
FREM1	LOF	AD	FREM1-AD	Severe Paediatric Disorders	Severe Paediatric Disorders	Bifid nose with or without anorectal and renal anomalies (608980) (AR);Manitoba oculotrichoanal syndrome (248450) (AR);Trigonocephaly 2 (614485) (AD)	0.000354421	0.000325144	0	0.00015266	0.000150703	0.000949988	0.0014655	0.000544221	0.00356232	0.00345213	0.000631605	0.00188557	0.000791454	0.00365182	0.00520915	0.00379194	0.00395765	0.00345213	0.000879947	0.00188557	0.000791454	0.00365746	0.00523229	0.004218	0.000354421	0.000325144	0	0.00015266	0.000150703	0.000949988	0.0014655	0.000544221	0.00356232	0.00345213	0.000631605	0.00188557	0.000791454	0.00365182	0.00520915	0.00379194	0.00395765	0.00345213	0.000879947
LMNA	Both	AD	LMNA-AD	DDG2P	Congenital/Developmental	Cardiomyopathy, dilated, 1A (115200) (AD);Charcot-Marie-Tooth disease, type 2B1 (605588) (AR);Emery-Dreifuss muscular dystrophy 2, autosomal dominant (181350) (AD);Emery-Dreifuss muscular dystrophy 3, autosomal recessive (616516) (AR);Heart-hand syndrome, Slovenian type (610140) (AD);Hutchinson-Gilford progeria (176670) (AD);Lipodystrophy, familial partial, type 2 (151660) (AD);Malouf syndrome (2…	0.000353544	0.000562441	7.65199e-05	0.000257264	0.00019089	0.000330207	0.000210111	0.000361694	0.00163399	0.00102779	0.00154638	0.000771901	0.000947091	0.00113878	0.000752419	0.000720234	0.00370947	0.00177373	0.00162567	0.00174199	0.0010608	0.00272203	0.00170991	0.00180098	0.000353544	0.000562441	7.65199e-05	0.000257264	0.00019089	0.000330207	0.000210111	0.000361694	0.00163399	0.00102779	0.00154638	0.000771901	0.000947091	0.00113878	0.000752419	0.000720234	0.00370947	0.00177373	0.00162567
LMNA	Both	AD	LMNA-AD	Skeletal dysplasia	Skeletal/Connective Tissue	Cardiomyopathy, dilated, 1A (115200) (AD);Charcot-Marie-Tooth disease, type 2B1 (605588) (AR);Emery-Dreifuss muscular dystrophy 2, autosomal dominant (181350) (AD);Emery-Dreifuss muscular dystrophy 3, autosomal recessive (616516) (AR);Heart-hand syndrome, Slovenian type (610140) (AD);Hutchinson-Gilford progeria (176670) (AD);Lipodystrophy, familial partial, type 2 (151660) (AD);Malouf syndrome (2…	0.000353544	0.000562441	7.65199e-05	0.000257264	0.00019089	0.000330207	0.000210111	0.000361694	0.00163399	0.00102779	0.00154638	0.000771901	0.000947091	0.00113878	0.000752419	0.000720234	0.00370947	0.00177373	0.00162567	0.00174199	0.0010608	0.00272203	0.00170991	0.00180098	0.000353544	0.000562441	7.65199e-05	0.000257264	0.00019089	0.000330207	0.000210111	0.000361694	0.00163399	0.00102779	0.00154638	0.000771901	0.000947091	0.00113878	0.000752419	0.000720234	0.00370947	0.00177373	0.00162567
LMNA	Both	AD	LMNA-AD	Severe Paediatric Disorders	Severe Paediatric Disorders	Cardiomyopathy, dilated, 1A (115200) (AD);Charcot-Marie-Tooth disease, type 2B1 (605588) (AR);Emery-Dreifuss muscular dystrophy 2, autosomal dominant (181350) (AD);Emery-Dreifuss muscular dystrophy 3, autosomal recessive (616516) (AR);Heart-hand syndrome, Slovenian type (610140) (AD);Hutchinson-Gilford progeria (176670) (AD);Lipodystrophy, familial partial, type 2 (151660) (AD);Malouf syndrome (2…	0.000353544	0.000562441	7.65199e-05	0.000257264	0.00019089	0.000330207	0.000210111	0.000361694	0.00163399	0.00102779	0.00154638	0.000771901	0.000947091	0.00113878	0.000752419	0.000720234	0.00370947	0.00177373	0.00162567	0.00174199	0.0010608	0.00272203	0.00170991	0.00180098	0.000353544	0.000562441	7.65199e-05	0.000257264	0.00019089	0.000330207	0.000210111	0.000361694	0.00163399	0.00102779	0.00154638	0.000771901	0.000947091	0.00113878	0.000752419	0.000720234	0.00370947	0.00177373	0.00162567
LMNA	Both	AD	LMNA-AD	Other rare neuromuscular disorders	Neuromuscular	Cardiomyopathy, dilated, 1A (115200) (AD);Charcot-Marie-Tooth disease, type 2B1 (605588) (AR);Emery-Dreifuss muscular dystrophy 2, autosomal dominant (181350) (AD);Emery-Dreifuss muscular dystrophy 3, autosomal recessive (616516) (AR);Heart-hand syndrome, Slovenian type (610140) (AD);Hutchinson-Gilford progeria (176670) (AD);Lipodystrophy, familial partial, type 2 (151660) (AD);Malouf syndrome (2…	0.000353544	0.000562441	7.65199e-05	0.000257264	0.00019089	0.000330207	0.000210111	0.000361694	0.00163399	0.00102779	0.00154638	0.000771901	0.000947091	0.00113878	0.000752419	0.000720234	0.00370947	0.00177373	0.00162567	0.00174199	0.0010608	0.00272203	0.00170991	0.00180098	0.000353544	0.000562441	7.65199e-05	0.000257264	0.00019089	0.000330207	0.000210111	0.000361694	0.00163399	0.00102779	0.00154638	0.000771901	0.000947091	0.00113878	0.000752419	0.000720234	0.00370947	0.00177373	0.00162567
LMNA	Both	AD	LMNA-AD	Lipodystrophy - childhood onset	Metabolic	Cardiomyopathy, dilated, 1A (115200) (AD);Charcot-Marie-Tooth disease, type 2B1 (605588) (AR);Emery-Dreifuss muscular dystrophy 2, autosomal dominant (181350) (AD);Emery-Dreifuss muscular dystrophy 3, autosomal recessive (616516) (AR);Heart-hand syndrome, Slovenian type (610140) (AD);Hutchinson-Gilford progeria (176670) (AD);Lipodystrophy, familial partial, type 2 (151660) (AD);Malouf syndrome (2…	0.000353544	0.000562441	7.65199e-05	0.000257264	0.00019089	0.000330207	0.000210111	0.000361694	0.00163399	0.00102779	0.00154638	0.000771901	0.000947091	0.00113878	0.000752419	0.000720234	0.00370947	0.00177373	0.00162567	0.00174199	0.0010608	0.00272203	0.00170991	0.00180098	0.000353544	0.000562441	7.65199e-05	0.000257264	0.00019089	0.000330207	0.000210111	0.000361694	0.00163399	0.00102779	0.00154638	0.000771901	0.000947091	0.00113878	0.000752419	0.000720234	0.00370947	0.00177373	0.00162567
LMNA	Both	AD	LMNA-AD	Diabetes with additional phenotypes suggestive of a monogenic aetiology	Endocrine	Cardiomyopathy, dilated, 1A (115200) (AD);Charcot-Marie-Tooth disease, type 2B1 (605588) (AR);Emery-Dreifuss muscular dystrophy 2, autosomal dominant (181350) (AD);Emery-Dreifuss muscular dystrophy 3, autosomal recessive (616516) (AR);Heart-hand syndrome, Slovenian type (610140) (AD);Hutchinson-Gilford progeria (176670) (AD);Lipodystrophy, familial partial, type 2 (151660) (AD);Malouf syndrome (2…	0.000353544	0.000562441	7.65199e-05	0.000257264	0.00019089	0.000330207	0.000210111	0.000361694	0.00163399	0.00102779	0.00154638	0.000771901	0.000947091	0.00113878	0.000752419	0.000720234	0.00370947	0.00177373	0.00162567	0.00174199	0.0010608	0.00272203	0.00170991	0.00180098	0.000353544	0.000562441	7.65199e-05	0.000257264	0.00019089	0.000330207	0.000210111	0.000361694	0.00163399	0.00102779	0.00154638	0.000771901	0.000947091	0.00113878	0.000752419	0.000720234	0.00370947	0.00177373	0.00162567
LMNA	Both	AD	LMNA-AD	Progressive cardiac conduction disease	Cardiovascular	Cardiomyopathy, dilated, 1A (115200) (AD);Charcot-Marie-Tooth disease, type 2B1 (605588) (AR);Emery-Dreifuss muscular dystrophy 2, autosomal dominant (181350) (AD);Emery-Dreifuss muscular dystrophy 3, autosomal recessive (616516) (AR);Heart-hand syndrome, Slovenian type (610140) (AD);Hutchinson-Gilford progeria (176670) (AD);Lipodystrophy, familial partial, type 2 (151660) (AD);Malouf syndrome (2…	0.000353544	0.000562441	7.65199e-05	0.000257264	0.00019089	0.000330207	0.000210111	0.000361694	0.00163399	0.00102779	0.00154638	0.000771901	0.000947091	0.00113878	0.000752419	0.000720234	0.00370947	0.00177373	0.00162567	0.00174199	0.0010608	0.00272203	0.00170991	0.00180098	0.000353544	0.000562441	7.65199e-05	0.000257264	0.00019089	0.000330207	0.000210111	0.000361694	0.00163399	0.00102779	0.00154638	0.000771901	0.000947091	0.00113878	0.000752419	0.000720234	0.00370947	0.00177373	0.00162567
TCF12	LOF	AD	TCF12-AD	Fetal anomalies	Congenital/Developmental	Craniosynostosis 3 (615314) (AD);Hypogonadotropic hypogonadism 26 with or without anosmia (619718) (AD, AR)	0.000352547	4.47417e-05	7.6555e-05	0.000202165	0.000149834	6.85192e-05	2.31935e-05	0.000239203	0.000352547	0.000223669	0.000233097	0.000404589	0.000299603	0.000536448	9.27612e-05	0.000657211	0.000352547	0.000357842	0.000233097	0.000404589	0.000299603	0.000586781	0.000162338	0.000895992	0.000352547	4.47417e-05	7.6555e-05	0.000202165	0.000149834	6.85192e-05	2.31935e-05	0.000239203	0.000352547	0.000223669	0.000233097	0.000404589	0.000299603	0.000536448	9.27612e-05	0.000657211	0.000352547	0.000357842	0.000233097
TCF12	LOF	AD	TCF12-AD	Common craniosynostosis syndromes	Skeletal/Connective Tissue	Craniosynostosis 3 (615314) (AD);Hypogonadotropic hypogonadism 26 with or without anosmia (619718) (AD, AR)	0.000352547	4.47417e-05	7.6555e-05	0.000202165	0.000149834	6.85192e-05	2.31935e-05	0.000239203	0.000352547	0.000223669	0.000233097	0.000404589	0.000299603	0.000536448	9.27612e-05	0.000657211	0.000352547	0.000357842	0.000233097	0.000404589	0.000299603	0.000586781	0.000162338	0.000895992	0.000352547	4.47417e-05	7.6555e-05	0.000202165	0.000149834	6.85192e-05	2.31935e-05	0.000239203	0.000352547	0.000223669	0.000233097	0.000404589	0.000299603	0.000536448	9.27612e-05	0.000657211	0.000352547	0.000357842	0.000233097
TCF12	LOF	AD	TCF12-AD	Severe Paediatric Disorders	Severe Paediatric Disorders	Craniosynostosis 3 (615314) (AD);Hypogonadotropic hypogonadism 26 with or without anosmia (619718) (AD, AR)	0.000352547	4.47417e-05	7.6555e-05	0.000202165	0.000149834	6.85192e-05	2.31935e-05	0.000239203	0.000352547	0.000223669	0.000233097	0.000404589	0.000299603	0.000536448	9.27612e-05	0.000657211	0.000352547	0.000357842	0.000233097	0.000404589	0.000299603	0.000586781	0.000162338	0.000895992	0.000352547	4.47417e-05	7.6555e-05	0.000202165	0.000149834	6.85192e-05	2.31935e-05	0.000239203	0.000352547	0.000223669	0.000233097	0.000404589	0.000299603	0.000536448	9.27612e-05	0.000657211	0.000352547	0.000357842	0.000233097
TCF12	LOF	AD	TCF12-AD	Hydrocephalus	Neurological	Craniosynostosis 3 (615314) (AD);Hypogonadotropic hypogonadism 26 with or without anosmia (619718) (AD, AR)	0.000352547	4.47417e-05	7.6555e-05	0.000202165	0.000149834	6.85192e-05	2.31935e-05	0.000239203	0.000352547	0.000223669	0.000233097	0.000404589	0.000299603	0.000536448	9.27612e-05	0.000657211	0.000352547	0.000357842	0.000233097	0.000404589	0.000299603	0.000586781	0.000162338	0.000895992	0.000352547	4.47417e-05	7.6555e-05	0.000202165	0.000149834	6.85192e-05	2.31935e-05	0.000239203	0.000352547	0.000223669	0.000233097	0.000404589	0.000299603	0.000536448	9.27612e-05	0.000657211	0.000352547	0.000357842	0.000233097
SLC6A5	LOF	AD	SLC6A5-AD	Severe Paediatric Disorders	Severe Paediatric Disorders	Hyperekplexia 3 (614618) (AD, AR)	0.000351927	0.000181185	0	0.000353143	3.74567e-05	0.000667331	0.000580343	0.000418201	0.00106154	0.000678008	0	0.000907886	3.74567e-05	0.00145645	0.00130702	0.000776421	0.00106154	0.00121424	7.65257e-05	0.00141111	0.000149795	0.00188967	0.00200151	0.00150328	0.000351927	0.000181185	0	0.000353143	3.74567e-05	0.000667331	0.000580343	0.000418201	0.00106154	0.000678008	0	0.000907886	3.74567e-05	0.00145645	0.00130702	0.000776421	0.00106154	0.00121424	7.65257e-05
SLC6A5	LOF	AD	SLC6A5-AD	Brain channelopathy	Neurological	Hyperekplexia 3 (614618) (AD, AR)	0.000351927	0.000181185	0	0.000353143	3.74567e-05	0.000667331	0.000580343	0.000418201	0.00106154	0.000678008	0	0.000907886	3.74567e-05	0.00145645	0.00130702	0.000776421	0.00106154	0.00121424	7.65257e-05	0.00141111	0.000149795	0.00188967	0.00200151	0.00150328	0.000351927	0.000181185	0	0.000353143	3.74567e-05	0.000667331	0.000580343	0.000418201	0.00106154	0.000678008	0	0.000907886	3.74567e-05	0.00145645	0.00130702	0.000776421	0.00106154	0.00121424	7.65257e-05
NPRL3	LOF	AD	NPRL3-AD	Severe Paediatric Disorders	Severe Paediatric Disorders	Epilepsy, familial focal, with variable foci 3 (617118) (AD)	0.000351927	5.50615e-05	0	0	7.53441e-05	1.82367e-05	0.000484088	0	0.000351927	0.000327642	0.000537397	0.000100773	0.000112835	0.000134011	0.000625931	0	0.000351927	0.000327642	0.000537397	0.000100773	0.000112835	0.00013581	0.000625931	0	0.000351927	5.50615e-05	0	0	7.53441e-05	1.82367e-05	0.000484088	0	0.000351927	0.000327642	0.000537397	0.000100773	0.000112835	0.000134011	0.000625931	0	0.000351927	0.000327642	0.000537397
NPRL3	LOF	AD	NPRL3-AD	Malformations of cortical development	Neurological	Epilepsy, familial focal, with variable foci 3 (617118) (AD)	0.000351927	5.50615e-05	0	0	7.53441e-05	1.82367e-05	0.000484088	0	0.000351927	0.000327642	0.000537397	0.000100773	0.000112835	0.000134011	0.000625931	0	0.000351927	0.000327642	0.000537397	0.000100773	0.000112835	0.00013581	0.000625931	0	0.000351927	5.50615e-05	0	0	7.53441e-05	1.82367e-05	0.000484088	0	0.000351927	0.000327642	0.000537397	0.000100773	0.000112835	0.000134011	0.000625931	0	0.000351927	0.000327642	0.000537397
ADCY5	Both	AD	ADCY5-AD	DDG2P	Congenital/Developmental	Dyskinesia with orofacial involvement, autosomal dominant (606703) (AD);Dyskinesia with orofacial involvement, autosomal recessive (619647) (AR);Neurodevelopmental disorder with hyperkinetic movements and dyskinesia (619651) (AR)	0.000350939	0.000262614	0	6.6558e-05	0.000239206	0.000108631	0.0001044	0	0.000350939	0.000922196	0.00044379	0.000355892	0.000450072	0.000374322	0.000393285	0.000134956	0.000697498	0.00177253	0.00136141	0.00126212	0.00213861	0.00100165	0.00125088	0.000672462	0.000350939	0.000262614	0	6.6558e-05	0.000239206	0.000108631	0.0001044	0	0.000350939	0.000922196	0.00044379	0.000355892	0.000450072	0.000374322	0.000393285	0.000134956	0.000697498	0.00177253	0.00136141
ADCY5	Both	AD	ADCY5-AD	Severe Paediatric Disorders	Severe Paediatric Disorders	Dyskinesia with orofacial involvement, autosomal dominant (606703) (AD);Dyskinesia with orofacial involvement, autosomal recessive (619647) (AR);Neurodevelopmental disorder with hyperkinetic movements and dyskinesia (619651) (AR)	0.000350939	0.000262614	0	6.6558e-05	0.000239206	0.000108631	0.0001044	0	0.000350939	0.000922196	0.00044379	0.000355892	0.000450072	0.000374322	0.000393285	0.000134956	0.000697498	0.00177253	0.00136141	0.00126212	0.00213861	0.00100165	0.00125088	0.000672462	0.000350939	0.000262614	0	6.6558e-05	0.000239206	0.000108631	0.0001044	0	0.000350939	0.000922196	0.00044379	0.000355892	0.000450072	0.000374322	0.000393285	0.000134956	0.000697498	0.00177253	0.00136141
ADCY5	Both	AD	ADCY5-AD	Skeletal Muscle Channelopathies	Neuromuscular	Dyskinesia with orofacial involvement, autosomal dominant (606703) (AD);Dyskinesia with orofacial involvement, autosomal recessive (619647) (AR);Neurodevelopmental disorder with hyperkinetic movements and dyskinesia (619651) (AR)	0.000350939	0.000262614	0	6.6558e-05	0.000239206	0.000108631	0.0001044	0	0.000350939	0.000922196	0.00044379	0.000355892	0.000450072	0.000374322	0.000393285	0.000134956	0.000697498	0.00177253	0.00136141	0.00126212	0.00213861	0.00100165	0.00125088	0.000672462	0.000350939	0.000262614	0	6.6558e-05	0.000239206	0.000108631	0.0001044	0	0.000350939	0.000922196	0.00044379	0.000355892	0.000450072	0.000374322	0.000393285	0.000134956	0.000697498	0.00177253	0.00136141
ADCY5	Both	AD	ADCY5-AD	Brain channelopathy	Neurological	Dyskinesia with orofacial involvement, autosomal dominant (606703) (AD);Dyskinesia with orofacial involvement, autosomal recessive (619647) (AR);Neurodevelopmental disorder with hyperkinetic movements and dyskinesia (619651) (AR)	0.000350939	0.000262614	0	6.6558e-05	0.000239206	0.000108631	0.0001044	0	0.000350939	0.000922196	0.00044379	0.000355892	0.000450072	0.000374322	0.000393285	0.000134956	0.000697498	0.00177253	0.00136141	0.00126212	0.00213861	0.00100165	0.00125088	0.000672462	0.000350939	0.000262614	0	6.6558e-05	0.000239206	0.000108631	0.0001044	0	0.000350939	0.000922196	0.00044379	0.000355892	0.000450072	0.000374322	0.000393285	0.000134956	0.000697498	0.00177253	0.00136141
COL12A1	LOF	AD	COL12A1-AD	Fetal anomalies	Congenital/Developmental	?Ullrich congenital muscular dystrophy 2 (616470) (AR);Bethlem myopathy 2 (616471) (AD)	0.000350816	9.01514e-05	0	0.000155581	0.000262215	7.76633e-05	2.31887e-05	6.2498e-05	0.00105233	0.0004014	0.000541973	0.000915751	0.000648458	0.000559395	0.000688275	0.000381286	0.00105233	0.000688004	0.000786093	0.00117648	0.000836325	0.000646169	0.00104504	0.000441066	0.000350816	9.01514e-05	0	0.000155581	0.000262215	7.76633e-05	2.31887e-05	6.2498e-05	0.00105233	0.0004014	0.000541973	0.000915751	0.000648458	0.000559395	0.000688275	0.000381286	0.00105233	0.000688004	0.000786093
COL12A1	LOF	AD	COL12A1-AD	Ehlers Danlos syndrome with a likely monogenic cause	Skeletal/Connective Tissue	?Ullrich congenital muscular dystrophy 2 (616470) (AR);Bethlem myopathy 2 (616471) (AD)	0.000350816	9.01514e-05	0	0.000155581	0.000262215	7.76633e-05	2.31887e-05	6.2498e-05	0.00105233	0.0004014	0.000541973	0.000915751	0.000648458	0.000559395	0.000688275	0.000381286	0.00105233	0.000688004	0.000786093	0.00117648	0.000836325	0.000646169	0.00104504	0.000441066	0.000350816	9.01514e-05	0	0.000155581	0.000262215	7.76633e-05	2.31887e-05	6.2498e-05	0.00105233	0.0004014	0.000541973	0.000915751	0.000648458	0.000559395	0.000688275	0.000381286	0.00105233	0.000688004	0.000786093
COL12A1	LOF	AD	COL12A1-AD	Severe Paediatric Disorders	Severe Paediatric Disorders	?Ullrich congenital muscular dystrophy 2 (616470) (AR);Bethlem myopathy 2 (616471) (AD)	0.000350816	9.01514e-05	0	0.000155581	0.000262215	7.76633e-05	2.31887e-05	6.2498e-05	0.00105233	0.0004014	0.000541973	0.000915751	0.000648458	0.000559395	0.000688275	0.000381286	0.00105233	0.000688004	0.000786093	0.00117648	0.000836325	0.000646169	0.00104504	0.000441066	0.000350816	9.01514e-05	0	0.000155581	0.000262215	7.76633e-05	2.31887e-05	6.2498e-05	0.00105233	0.0004014	0.000541973	0.000915751	0.000648458	0.000559395	0.000688275	0.000381286	0.00105233	0.000688004	0.000786093
COL12A1	LOF	AD	COL12A1-AD	Other rare neuromuscular disorders	Neuromuscular	?Ullrich congenital muscular dystrophy 2 (616470) (AR);Bethlem myopathy 2 (616471) (AD)	0.000350816	9.01514e-05	0	0.000155581	0.000262215	7.76633e-05	2.31887e-05	6.2498e-05	0.00105233	0.0004014	0.000541973	0.000915751	0.000648458	0.000559395	0.000688275	0.000381286	0.00105233	0.000688004	0.000786093	0.00117648	0.000836325	0.000646169	0.00104504	0.000441066	0.000350816	9.01514e-05	0	0.000155581	0.000262215	7.76633e-05	2.31887e-05	6.2498e-05	0.00105233	0.0004014	0.000541973	0.000915751	0.000648458	0.000559395	0.000688275	0.000381286	0.00105233	0.000688004	0.000786093
ALG8	LOF	AD	ALG8-AD	Ductal plate malformation	Congenital/Developmental	Congenital disorder of glycosylation, type Ih (608104) (AR);Polycystic liver disease 3 with or without kidney cysts (617874) (AD)	0.000350693	0.000268286	0	0.000151331	0.00538549	0.00053876	0.000139756	0.000372054	0.00278302	0.00155741	0.00199096	0.000668808	0.00553505	0.00169104	0.0010669	0.00218029	0.00312957	0.00178339	0.00199096	0.000971114	0.0055723	0.00187464	0.00173844	0.00229951	0.000350693	0.000268286	0	0.000151331	0.00538549	0.00053876	0.000139756	0.000372054	0.00278302	0.00155741	0.00199096	0.000668808	0.00553505	0.00169104	0.0010669	0.00218029	0.00312957	0.00178339	0.00199096
ALG8	LOF	AD	ALG8-AD	Severe Paediatric Disorders	Severe Paediatric Disorders	Congenital disorder of glycosylation, type Ih (608104) (AR);Polycystic liver disease 3 with or without kidney cysts (617874) (AD)	0.000350693	0.000268286	0	0.000151331	0.00538549	0.00053876	0.000139756	0.000372054	0.00278302	0.00155741	0.00199096	0.000668808	0.00553505	0.00169104	0.0010669	0.00218029	0.00312957	0.00178339	0.00199096	0.000971114	0.0055723	0.00187464	0.00173844	0.00229951	0.000350693	0.000268286	0	0.000151331	0.00538549	0.00053876	0.000139756	0.000372054	0.00278302	0.00155741	0.00199096	0.000668808	0.00553505	0.00169104	0.0010669	0.00218029	0.00312957	0.00178339	0.00199096
ALG8	LOF	AD	ALG8-AD	Cystic kidney disease	Kidney/Urinary System	Congenital disorder of glycosylation, type Ih (608104) (AR);Polycystic liver disease 3 with or without kidney cysts (617874) (AD)	0.000350693	0.000268286	0	0.000151331	0.00538549	0.00053876	0.000139756	0.000372054	0.00278302	0.00155741	0.00199096	0.000668808	0.00553505	0.00169104	0.0010669	0.00218029	0.00312957	0.00178339	0.00199096	0.000971114	0.0055723	0.00187464	0.00173844	0.00229951	0.000350693	0.000268286	0	0.000151331	0.00538549	0.00053876	0.000139756	0.000372054	0.00278302	0.00155741	0.00199096	0.000668808	0.00553505	0.00169104	0.0010669	0.00218029	0.00312957	0.00178339	0.00199096
ALG8	LOF	AD	ALG8-AD	Polycystic liver disease	Gastrointestinal	Congenital disorder of glycosylation, type Ih (608104) (AR);Polycystic liver disease 3 with or without kidney cysts (617874) (AD)	0.000350693	0.000268286	0	0.000151331	0.00538549	0.00053876	0.000139756	0.000372054	0.00278302	0.00155741	0.00199096	0.000668808	0.00553505	0.00169104	0.0010669	0.00218029	0.00312957	0.00178339	0.00199096	0.000971114	0.0055723	0.00187464	0.00173844	0.00229951	0.000350693	0.000268286	0	0.000151331	0.00538549	0.00053876	0.000139756	0.000372054	0.00278302	0.00155741	0.00199096	0.000668808	0.00553505	0.00169104	0.0010669	0.00218029	0.00312957	0.00178339	0.00199096
DICER1	LOF	AD	DICER1-AD	Inherited non-medullary thyroid cancer	Neoplasm	GLOW syndrome, somatic mosaic (618272);Goiter, multinodular 1, with or without Sertoli-Leydig cell tumors (138800) (AD);Pleuropulmonary blastoma (601200) (AD);Rhabdomyosarcoma, embryonal, 2 (180295)	0.000350447	8.94334e-05	7.67312e-05	0.000100763	0.000112311	5.22649e-05	9.27606e-05	5.97354e-05	0.000350447	0.000134185	7.67312e-05	0.000100763	0.000189362	0.000180169	0.000256011	0.000179213	0.000350447	0.000178899	0.000153245	0.000153118	0.000264223	0.000223329	0.000302371	0.000179213	0.000350447	8.94334e-05	7.67312e-05	0.000100763	0.000112311	5.22649e-05	9.27606e-05	5.97354e-05	0.000350447	0.000134185	7.67312e-05	0.000100763	0.000189362	0.000180169	0.000256011	0.000179213	0.000350447	0.000178899	0.000153245
TRPM4	Both	AD	TRPM4-AD	Severe Paediatric Disorders	Severe Paediatric Disorders	Erythrokeratodermia variabilis et progressiva 6 (618531) (AD);Progressive familial heart block, type IB (604559) (AD)	0.000350447	0.000134149	0	0.000256568	3.74385e-05	0.000144344	0.000115934	0.000179199	0.0028734	0.00306671	0	0.00332478	0.00414935	0.0031598	0.00138698	0.0015995	0.00946216	0.00466502	0.0287503	0.0053427	0.00442588	0.00544258	0.00334247	0.00244061	0.000350447	0.000134149	0	0.000256568	3.74385e-05	0.000144344	0.000115934	0.000179199	0.0028734	0.00306671	0	0.00332478	0.00414935	0.0031598	0.00138698	0.0015995	0.00946216	0.00466502	0.0287503
NEFL	LOF	AD	NEFL-AD	Severe Paediatric Disorders	Severe Paediatric Disorders	Charcot-Marie-Tooth disease, dominant intermediate G (617882) (AD);Charcot-Marie-Tooth disease, type 1F (607734) (AD, AR);Charcot-Marie-Tooth disease, type 2E (607684) (AD)	0.000350079	9.08865e-05	7.6932e-05	5.04096e-05	0.000599115	3.42086e-05	2.31881e-05	0	0.000696638	0.000182098	7.6932e-05	0.000201822	0.000689234	0.000136913	4.63919e-05	0.000120371	0.000696638	0.000182098	0.000154042	0.000201822	0.000689234	0.000158496	4.63919e-05	0.000120371	0.000350079	9.08865e-05	7.6932e-05	5.04096e-05	0.000599115	3.42086e-05	2.31881e-05	0	0.000696638	0.000182098	7.6932e-05	0.000201822	0.000689234	0.000136913	4.63919e-05	0.000120371	0.000696638	0.000182098	0.000154042
NEFL	LOF	AD	NEFL-AD	Hereditary neuropathy	Neurological	Charcot-Marie-Tooth disease, dominant intermediate G (617882) (AD);Charcot-Marie-Tooth disease, type 1F (607734) (AD, AR);Charcot-Marie-Tooth disease, type 2E (607684) (AD)	0.000350079	9.08865e-05	7.6932e-05	5.04096e-05	0.000599115	3.42086e-05	2.31881e-05	0	0.000696638	0.000182098	7.6932e-05	0.000201822	0.000689234	0.000136913	4.63919e-05	0.000120371	0.000696638	0.000182098	0.000154042	0.000201822	0.000689234	0.000158496	4.63919e-05	0.000120371	0.000350079	9.08865e-05	7.6932e-05	5.04096e-05	0.000599115	3.42086e-05	2.31881e-05	0	0.000696638	0.000182098	7.6932e-05	0.000201822	0.000689234	0.000136913	4.63919e-05	0.000120371	0.000696638	0.000182098	0.000154042
LRP4	LOF	AD	LRP4-AD	Limb disorders	Skeletal/Connective Tissue	?Myasthenic syndrome, congenital, 17 (616304) (AR);Cenani-Lenz syndactyly syndrome (212780) (AR);Sclerosteosis 2 (614305) (AD, AR)	0.000349711	0.000223575	7.65199e-05	0.000100794	3.74385e-05	9.55983e-05	0.000162355	0	0.000349711	0.000491803	0.000765768	0.000403096	0.000300116	0.000540327	0.000672456	0.000239149	0.000696271	0.000938726	0.000918684	0.000956893	0.000749684	0.00105991	0.00113578	0.000358613	0.000349711	0.000223575	7.65199e-05	0.000100794	3.74385e-05	9.55983e-05	0.000162355	0	0.000349711	0.000491803	0.000765768	0.000403096	0.000300116	0.000540327	0.000672456	0.000239149	0.000696271	0.000938726	0.000918684
LRP4	LOF	AD	LRP4-AD	Severe Paediatric Disorders	Severe Paediatric Disorders	?Myasthenic syndrome, congenital, 17 (616304) (AR);Cenani-Lenz syndactyly syndrome (212780) (AR);Sclerosteosis 2 (614305) (AD, AR)	0.000349711	0.000223575	7.65199e-05	0.000100794	3.74385e-05	9.55983e-05	0.000162355	0	0.000349711	0.000491803	0.000765768	0.000403096	0.000300116	0.000540327	0.000672456	0.000239149	0.000696271	0.000938726	0.000918684	0.000956893	0.000749684	0.00105991	0.00113578	0.000358613	0.000349711	0.000223575	7.65199e-05	0.000100794	3.74385e-05	9.55983e-05	0.000162355	0	0.000349711	0.000491803	0.000765768	0.000403096	0.000300116	0.000540327	0.000672456	0.000239149	0.000696271	0.000938726	0.000918684
DSTYK	LOF	AD	DSTYK-AD	Fetal anomalies	Congenital/Developmental	Congenital anomalies of kidney and urinary tract 1 (610805) (AD);Spastic paraplegia 23, autosomal recessive (270750) (AR)	0.000349711	0.0015477	0	5.0402e-05	3.76967e-05	0.000915463	0.000115992	0.00029984	0.000349711	0.00172886	0	0.000554861	7.51338e-05	0.00104502	0.00173085	0.000480537	0.000349711	0.00186279	0	0.000655556	7.51338e-05	0.00108456	0.00182343	0.000599968	0.000349711	0.0015477	0	5.0402e-05	3.76967e-05	0.000915463	0.000115992	0.00029984	0.000349711	0.00172886	0	0.000554861	7.51338e-05	0.00104502	0.00173085	0.000480537	0.000349711	0.00186279	0
[truncated: 12,073 more rows]
[truncated: 29 more columns]
